# Supplementary material for: Extracellular condensates (ECs) are endogenous modulators of HIV transcription and latency reactivation
Source: Mol Psychiatry. Author manuscript; Available in PMC 2026 May 26. (PMC12999493; doi:10.1038/s41380-025-03354-w)
Supplement: Supplemental Table 1 [file NIHMS2143136-supplement-Supplemental_Table_1.xlsx]

## Sheet: All gene pvalue 1 and above
	List of genes with Raw TPMs P values ≥1
	Gene ID	Gene Name	PBS 1	PBS 2	PBS 3	Mean PBS		Gene ID	Gene Name	VEH 1	VEH 2	VEH 3	Mean VEH		Gene ID	Gene Name	VEH/SIV 1	VEH/SIV 2	VEH/SIV 3	Mean VEH/SIV		Gene ID	Gene Name	THC/SIV 1	THC/SIV 2	THC/SIV 3	Mean THC/SIV
	ENSG00000000419	DPM1	57.7236	62.2048	65.3899	61.7728		ENSG00000000419	DPM1	47.2714	40.903	46.9535	45.0426		ENSG00000000419	DPM1	39.4796	42.7043	50.4794	44.2211		ENSG00000008988	RPS20	11260.1	11204.3	24.4321	7496.29
	ENSG00000000457	SCYL3	7.37479	7.21785	6.76849	7.12038		ENSG00000000457	SCYL3	4.75797	5.3137	4.49959	4.85708		ENSG00000000457	SCYL3	5.0093	4.64897	5.02897	4.89575		ENSG00000230795	HLA-K	1.91825	17396.4	2.57041	5800.29
	ENSG00000000460	C1orf112	12.5695	11.9294	14.6009	13.0332		ENSG00000000460	C1orf112	7.91021	9.6163	8.03967	8.52206		ENSG00000000460	C1orf112	12.5108	7.24552	7.88396	9.21342		ENSG00000230537	LINC02937	1.62582	1.69408	17245.3	5749.55
	ENSG00000000938	FGR	52.9292	54.4069	57.7082	55.0148		ENSG00000000938	FGR	32.046	35.5902	36.9666	34.8676		ENSG00000000938	FGR	31.5343	32.0374	19.0207	27.5308		ENSG00000231500	RPS18	17100.2	6.74869	116.969	5741.3
	ENSG00000001036	FUCA2	81.493	79.7185	78.25	79.8205		ENSG00000001036	FUCA2	83.2828	77.4961	78.6994	79.8261		ENSG00000001036	FUCA2	82.1461	81.5273	79.0588	80.9107		ENSG00000156299	TIAM1	3.4674	13838.7	100.914	4647.7
	ENSG00000001084	GCLC	40.9296	41.6974	40.5526	41.0599		ENSG00000001084	GCLC	44.8483	46.0005	42.8694	44.5727		ENSG00000001084	GCLC	42.3458	43.9083	38.7076	41.6539		ENSG00000156381	ANKRD9	4.91338	61.1415	13842.1	4636.06
	ENSG00000001167	NFYA	61.3592	64.958	62.8869	63.068		ENSG00000001167	NFYA	31.6064	33.0731	31.2473	31.9756		ENSG00000001167	NFYA	38.5721	35.1083	38.9043	37.5282		ENSG00000156508	EEF1A1	13651.6	18.0203	27.3696	4565.67
	ENSG00000001460	STPG1	3.67024	3.94957	3.84382	3.82121		ENSG00000001460	STPG1	1.79535	3.21084	2.61576	2.54065		ENSG00000001460	STPG1	2.55368	2.76266	12.799	6.03843		ENSG00000198841	KTI12	25.3799	12902.7	35.3379	4321.14
	ENSG00000001461	NIPAL3	15.052	16.6633	15.0949	15.6034		ENSG00000001461	NIPAL3	11.9729	13.0987	12.8565	12.6427		ENSG00000001461	NIPAL3	11.5299	11.9963	58.8173	27.4478		ENSG00000198886	MT-ND4	12480.4	15.6066	5.84743	4167.3
	ENSG00000001497	LAS1L	91.4191	90.0259	87.9595	89.8015		ENSG00000001497	LAS1L	39.3033	44.0849	45.9521	43.1134		ENSG00000001497	LAS1L	52.3861	51.3037	6.29407	36.6613		ENSG00000112208	BAG2	1.51321	5990.69	5873.42	3955.21
	ENSG00000001617	SEMA3F	7.01564	8.61192	9.02223	8.2166		ENSG00000001617	SEMA3F	6.58888	5.80916	6.8042	6.40075		ENSG00000001617	SEMA3F	7.45484	7.93152	22.5027	12.6297		ENSG00000142185	TRPM2	31.299	11021.5	31.0871	3694.63
	ENSG00000001629	ANKIB1	30.692	31.2065	28.934	30.2775		ENSG00000001629	ANKIB1	23.6505	24.9698	23.7364	24.1189		ENSG00000001629	ANKIB1	26.8577	25.712	73.7739	42.1145		ENSG00000142230	SAE1	224.104	113.599	10688.5	3675.4
	ENSG00000001630	CYP51A1	67.4129	95.9845	93.0459	85.4811		ENSG00000001630	CYP51A1	64.6956	67.445	41.6665	57.9357		ENSG00000001630	CYP51A1	73.4892	74.9561	27.9467	58.7973		ENSG00000009335	UBE3C	19.0394	18.5217	10853.8	3630.47
	ENSG00000001631	KRIT1	41.0112	41.3508	40.5862	40.9827		ENSG00000001631	KRIT1	31.5804	33.9367	31.2829	32.2667		ENSG00000001631	KRIT1	29.2809	31.3213	10.9256	23.8426		ENSG00000087086	FTL	9878.17	43.3919	16.9927	3312.85
	ENSG00000002016	RAD52	10.8818	11.7432	11.4939	11.373		ENSG00000002016	RAD52	11.986	10.5779	14.4405	12.3348		ENSG00000002016	RAD52	16.0891	12.9765	48.6935	25.9197		ENSG00000142534	RPS11	9615.51	135.292	29.6593	3260.16
	ENSG00000002330	BAD	46.017	45.7519	45.5106	45.7598		ENSG00000002330	BAD	35.7827	34.9762	36.3526	35.7038		ENSG00000002330	BAD	32.5529	42.29	37.7465	37.5298		ENSG00000142252	GEMIN7	14.4299	213.421	9517.87	3248.57
	ENSG00000002549	LAP3	56.6717	57.2827	55.4457	56.4667		ENSG00000002549	LAP3	30.3469	33.0929	30.5077	31.3159		ENSG00000002549	LAP3	35.716	35.204	279.738	116.886		ENSG00000177917	ARL6IP6	34.7434	9463.84	82.6438	3193.74
	ENSG00000002586	CD99	253.707	259.326	261.016	258.016		ENSG00000002586	CD99	251.934	260.487	263.684	258.702		ENSG00000002586	CD99	288.771	284.148	91.6097	221.51		ENSG00000086848	ALG9	15.9634	6.94758	9481.22	3168.04
	ENSG00000002822	MAD1L1	109.997	107.177	111.518	109.564		ENSG00000002822	MAD1L1	77.4705	73.0823	80.6511	77.0679		ENSG00000002822	MAD1L1	91.8223	92.2737	153.214	112.437		ENSG00000142541	RPL13A	9380.72	7.64874	30.4359	3139.6
	ENSG00000002834	LASP1	174.552	179.33	176.2	176.694		ENSG00000002834	LASP1	146.124	148.469	149.874	148.156		ENSG00000002834	LASP1	160.577	150.613	11.4003	107.53		ENSG00000182518	FAM104B	5.93053	9390.71	10.0979	3135.58
	ENSG00000002919	SNX11	20.1746	18.6316	19.1535	19.3199		ENSG00000002919	SNX11	10.0899	10.5956	11.1074	10.5976		ENSG00000002919	SNX11	11.7235	11.1058	267.005	96.6113		ENSG00000114268	PFKFB4	54.0537	4652.74	4690.31	3132.37
	ENSG00000003056	M6PR	314.839	333.693	322.254	323.595		ENSG00000003056	M6PR	262.267	291.48	284.05	279.266		ENSG00000003056	M6PR	286.807	257.672	17.7107	187.396		ENSG00000182774	RPS17	9340.04	2.49369	2.11451	3114.88
	ENSG00000003147	ICA1	17.0377	18.1083	18.6516	17.9325		ENSG00000003147	ICA1	14.6758	14.6976	14.3316	14.5683		ENSG00000003147	ICA1	16.6049	17.5703	8.45726	14.2108		ENSG00000177683	THAP5	8.29898	2.57194	9214.58	3075.15
	ENSG00000003393	ALS2	13.814	14.0497	13.9989	13.9542		ENSG00000003393	ALS2	9.63465	10.9349	9.16464	9.91139		ENSG00000003393	ALS2	10.3499	8.06961	4.29931	7.57295		ENSG00000177954	RPS27	9009.87	24.5888	21.1246	3018.53
	ENSG00000003400	CASP10	6.34542	7.46495	7.28104	7.03047		ENSG00000003400	CASP10	5.08617	3.81011	4.60163	4.4993		ENSG00000003400	CASP10	5.02995	4.28098	22.0676	10.4595		ENSG00000087008	ACOX3	8.71935	8748.38	232.883	2996.66
	ENSG00000003402	CFLAR	21.463	23.2084	21.4763	22.0493		ENSG00000003402	CFLAR	19.5767	22.8482	20.2502	20.8917		ENSG00000003402	CFLAR	24.9781	19.4656	14.9491	19.7976		ENSG00000083807	SLC27A5	15.0069	4341.25	4394.14	2916.8
	ENSG00000003509	NDUFAF7	20.6667	21.3543	18.3528	20.1246		ENSG00000003509	NDUFAF7	13.8569	17.801	17.0704	16.2428		ENSG00000003509	NDUFAF7	15.9572	16.9839	192.656	75.1992		ENSG00000182362	YBEY	3.87703	5.88171	8651.16	2886.97
	ENSG00000003756	RBM5	161.317	165.808	155.471	160.865		ENSG00000003756	RBM5	200.915	187.459	186.596	191.657		ENSG00000003756	RBM5	200.71	167.485	80.5063	149.567		ENSG00000142186	SCYL1	58.7089	7638.63	54.2777	2583.87
	ENSG00000003987	MTMR7	1.20742	1.15346	1.15396	1.17161		ENSG00000003987	MTMR7	1.57532	2.02948	1.33019	1.64499		ENSG00000003987	MTMR7	1.3599	94.6683	1.68001	32.5694		ENSG00000161692	DBF4B	20.7483	7347.6	39.23	2469.19
	ENSG00000004059	ARF5	97.8197	108.647	105.366	103.944		ENSG00000004059	ARF5	78.7514	71.6675	61.5623	70.6604		ENSG00000004059	ARF5	71.5412	1.69319	51.9965	41.7437		ENSG00000161970	RPL26	7327.41	12.6051	8.44369	2449.49
	ENSG00000004139	SARM1	3.74401	2.00971	2.59991	2.78454		ENSG00000004139	SARM1	1.26232	1.59738	1.48331	1.44767		ENSG00000004142	POLDIP2	57.5141	56.6449	148.06	87.4062		ENSG00000100316	RPL3	6950.43	301.337	2.03238	2417.93
	ENSG00000004142	POLDIP2	84.1178	80.7001	81.6817	82.1665		ENSG00000004142	POLDIP2	48.9797	49.5351	45.6617	48.0589		ENSG00000004399	PLXND1	133.042	145.257	183.37	153.89		ENSG00000161813	LARP4	16.1033	9.62336	7208.07	2411.26
	ENSG00000004399	PLXND1	105.377	79.1505	80.992	88.5064		ENSG00000004399	PLXND1	127.782	152.438	169.356	149.858		ENSG00000004455	AK2	194.74	182.943	4.06199	127.248		ENSG00000156256	USP16	17.1868	6956.61	109.82	2361.2
	ENSG00000004455	AK2	246.495	255.014	214.577	238.695		ENSG00000004455	AK2	169.67	174.501	161.611	168.594		ENSG00000004468	CD38	2.66327	3.82483	135.616	47.3682		ENSG00000124570	SERPINB6	142.56	63.5493	6845.58	2350.56
	ENSG00000004468	CD38	3.46638	3.96382	3.44944	3.62655		ENSG00000004468	CD38	1.61634	3.12195	3.0284	2.5889		ENSG00000004478	FKBP4	143.01	130.613	55.9377	109.853		ENSG00000124614	RPS10	6721.16	9.45282	194.898	2308.5
	ENSG00000004478	FKBP4	134.812	133.432	132.992	133.745		ENSG00000004478	FKBP4	128.471	127.312	124.85	126.878		ENSG00000004487	KDM1A	48.6979	49.0308	117.219	71.6493		ENSG00000156482	RPL30	6829.95	23.5092	65.5929	2306.35
	ENSG00000004487	KDM1A	72.209	71.6617	72.4522	72.1076		ENSG00000004487	KDM1A	59.6293	46.1083	51.7034	52.4803		ENSG00000004534	RBM6	111.824	102.286	11.8333	75.3144		ENSG00000100284	TOM1	55.106	1.91039	6850.94	2302.65
	ENSG00000004534	RBM6	118.428	123.185	113.084	118.232		ENSG00000004534	RBM6	108.732	108.718	116.489	111.313		ENSG00000004660	CAMKK1	13.7497	15.1784	26.2263	18.3848		ENSG00000156304	SCAF4	31.4443	7.3724	6813.19	2284
	ENSG00000004660	CAMKK1	7.05912	7.23828	7.11933	7.13891		ENSG00000004660	CAMKK1	13.9589	11.8589	13.2238	13.0139		ENSG00000004700	RECQL	22.5024	19.8556	12.2752	18.2111		ENSG00000124486	USP9X	32.0469	6677.45	136.327	2281.94
	ENSG00000004700	RECQL	33.0537	34.5614	34.1748	33.93		ENSG00000004700	RECQL	25.1965	25.3687	27.907	26.1574		ENSG00000004766	VPS50	14.5094	10.5131	1.69734	8.90659		ENSG00000100294	MCAT	2.8768	6730.68	33.6227	2255.73
	ENSG00000004766	VPS50	15.912	14.6257	14.9717	15.1698		ENSG00000004766	VPS50	14.9822	14.8603	13.2933	14.3786		ENSG00000004777	ARHGAP33	18.3816	14.1016	15.0009	15.828		ENSG00000133028	SCO1	10.453	22.6431	6656.62	2229.91
	ENSG00000004776	HSPB6	1.10893	16.6999	1.03458	6.28115		ENSG00000004777	ARHGAP33	14.7636	13.4098	1.17839	9.78392		ENSG00000004779	NDUFAB1	82.7103	128.582	98.3324	103.208		ENSG00000160949	TONSL	19.4782	1.83898	6595.88	2205.73
	ENSG00000004777	ARHGAP33	15.8866	171.781	17.0161	68.2279		ENSG00000004779	NDUFAB1	117.887	111.112	14.3276	81.109		ENSG00000004809	SLC22A16	10.7036	9.72388	11.071	10.4995		ENSG00000161016	RPL8	6480.11	6.24671	40.2842	2175.55
	ENSG00000004779	NDUFAB1	178.67	13.9548	178.568	123.731		ENSG00000004809	SLC22A16	8.66462	10.4887	94.2129	37.7888		ENSG00000004838	ZMYND10	4.53791	2.72816	4.2003	3.82212		ENSG00000163682	RPL9	6406.95	44.5523	30.7038	2160.74
	ENSG00000004809	SLC22A16	14.9966	1.86196	13.2493	10.036		ENSG00000004838	ZMYND10	3.85688	3.6431	10.9738	6.15792		ENSG00000004864	SLC25A13	28.6893	26.7586	29.7486	28.3988		ENSG00000160917	CPSF4	46.4638	6354.14	26.9037	2142.5
	ENSG00000004838	ZMYND10	1.4628	37.4451	2.16325	13.6904		ENSG00000004864	SLC25A13	28.7321	30.0272	3.62296	20.7941		ENSG00000004866	ST7	12.0406	10.0279	9.12538	10.398		ENSG00000142552	RCN3	17.0834	6371.04	11.9732	2133.37
	ENSG00000004848	ARX	1.09194	12.7259	35.7294	16.5157		ENSG00000004866	ST7	8.33975	9.49571	31.5423	16.4592		ENSG00000004897	CDC27	28.3717	26.8566	26.4606	27.2296		ENSG00000142684	ZNF593	52.6546	34.1912	6284.84	2123.9
	ENSG00000004864	SLC25A13	36.6479	50.5789	14.2858	33.8376		ENSG00000004897	CDC27	30.0959	28.9973	8.33885	22.4773		ENSG00000004961	HCCS	18.9441	16.6417	20.8548	18.8136		ENSG00000254562	LINC01493	2.39583	4.7285	6342.47	2116.53
	ENSG00000004866	ST7	13.6374	31.666	44.6907	29.998		ENSG00000004961	HCCS	17.3302	18.8399	31.0394	22.4032		ENSG00000004975	DVL2	16.5436	21.731	20.8984	19.7243		ENSG00000142937	RPS8	6209.58	109.748	26.9169	2115.42
	ENSG00000004897	CDC27	42.0056	20.8152	31.9714	31.5974		ENSG00000004975	DVL2	13.7552	15.3142	17.7344	15.6013		ENSG00000005007	UPF1	69.0403	73.7537	73.8605	72.2182		ENSG00000163605	PPP4R2	30.8988	12.8925	6285.74	2109.84
	ENSG00000004961	HCCS	30.2615	83.0509	21.1605	44.8243		ENSG00000005007	UPF1	66.5902	65.1264	15.5941	49.1036		ENSG00000005020	SKAP2	81.2826	80.3718	75.6338	79.0961		ENSG00000163608	NEPRO	33.1077	6281.39	7.05457	2107.18
	ENSG00000004975	DVL2	22.4486	118.46	83.9726	74.9603		ENSG00000005020	SKAP2	83.7711	85.4844	66.1971	78.4842		ENSG00000005022	SLC25A5	657.065	665.013	658.14	660.073		ENSG00000255062	TIRAP-AS1	1.55467	6185.41	2.92154	2063.3
	ENSG00000005007	UPF1	90.2853	762.888	116.493	323.222		ENSG00000005022	SLC25A5	625.134	627.758	89.4978	447.463		ENSG00000005059	MCUB	5.50461	6.32012	4.6783	5.50101		ENSG00000149273	RPS3	6044.1	22.8973	87.9935	2051.66
	ENSG00000005020	SKAP2	113.156	9.34131	762.778	295.092		ENSG00000005059	MCUB	5.17165	5.24917	612.962	207.794		ENSG00000005073	HOXA11	42.9445	39.3979	43.2308	41.8577		ENSG00000254772	EEF1G	6117	6.37955	4.31717	2042.57
	ENSG00000005022	SLC25A5	739.844	44.0485	8.88922	264.261		ENSG00000005073	HOXA11	41.7666	41.1973	4.56573	29.1766		ENSG00000005075	POLR2J	90.4776	83.9165	85.3388	86.5776		ENSG00000149196	HIKESHI	27.239	37.6824	6011.33	2025.42
	ENSG00000005059	MCUB	9.57384	92.3179	42.8424	48.2447		ENSG00000005075	POLR2J	73.059	72.6075	43.8336	63.1667		ENSG00000005100	DHX33	13.6857	10.4364	11.0995	11.7405		ENSG00000112306	RPS12	5941.41	3.97265	68.9009	2004.76
	ENSG00000005073	HOXA11	46.7572	27.6859	92.3821	55.6084		ENSG00000005100	DHX33	12.5344	11.9653	84.412	36.3039		ENSG00000005156	LIG3	7.6733	6.02113	5.11196	6.26879		ENSG00000063176	SPHK2	15.4207	483.112	5510.19	2002.91
	ENSG00000005075	POLR2J	97.4363	13.7911	25.7739	45.6671		ENSG00000005156	LIG3	7.01249	6.07806	9.64452	7.57836		ENSG00000005175	RPAP3	16.1155	17.4533	17.9437	17.1708		ENSG00000149016	TUT1	9.86829	5938.9	42.835	1997.2
	ENSG00000005100	DHX33	26.0313	28.7034	10.8966	21.8771		ENSG00000005175	RPAP3	16.2552	19.4893	4.49113	13.4118		ENSG00000005187	ACSM3	6.49783	10.202	7.63342	8.11109		ENSG00000140853	NLRC5	5.80122	252.887	5724.96	1994.55
	ENSG00000005156	LIG3	12.7569	15.869	25.8963	18.1741		ENSG00000005187	ACSM3	8.13866	7.88274	17.7003	11.2406		ENSG00000005189	REXO5	10.3013	12.917	13.6766	12.2983		ENSG00000132964	CDK8	17.2942	5941.4	3.37785	1987.36
	ENSG00000005175	RPAP3	27.4476	14.9705	15.0224	19.1468		ENSG00000005189	REXO5	10.7763	12.2745	8.34716	10.466		ENSG00000005194	CIAPIN1	39.029	41.8375	35.5399	38.8021		ENSG00000063241	ISOC2	58.6464	5653.6	249.077	1987.11
	ENSG00000005187	ACSM3	12.6951	63.2571	15.8894	30.6139		ENSG00000005194	CIAPIN1	36.0446	35.717	13.1619	28.3079		ENSG00000005206	SPPL2B	27.5562	28.5353	32.1795	29.4236		ENSG00000147421	HMBOX1	21.1285	5815.2	34.4155	1956.91
	ENSG00000005189	REXO5	14.7975	31.8808	60.3668	35.6817		ENSG00000005206	SPPL2B	24.3902	27.0414	36.5435	29.325		ENSG00000005238	ATOSB	4.59666	5.04388	9.30876	6.31644		ENSG00000089157	RPLP0	5562.6	242.964	65.0918	1956.89
	ENSG00000005194	CIAPIN1	62.1674	5.32332	33.7412	33.744		ENSG00000005238	ATOSB	6.49989	5.86521	22.2122	11.5258		ENSG00000005249	PRKAR2B	1.71239	1.62124	1.63902	1.65755		ENSG00000138326	RPS24	5748.25	2.26797	94.0491	1948.19
	ENSG00000005206	SPPL2B	34.9739	3.23746	6.0539	14.7551		ENSG00000005249	PRKAR2B	1.13959	1.12454	6.96847	3.07753		ENSG00000005302	MSL3	25.158	27.0388	23.3473	25.1814		ENSG00000136982	DSCC1	17.8664	5712.66	108.677	1946.4
	ENSG00000005238	ATOSB	7.50001	35.1772	3.05345	15.2435		ENSG00000005302	MSL3	27.145	27.6594	25.2993	26.7012		ENSG00000005339	CREBBP	13.0519	8.1225	11.6475	10.9406		ENSG00000089094	KDM2B	27.2548	5322.35	453.972	1934.53
	ENSG00000005249	PRKAR2B	3.5029	15.0771	39.4853	19.3551		ENSG00000005339	CREBBP	10.9101	11.6551	11.9616	11.5089		ENSG00000005379	TSPOAP1	1.82687	1.40794	2.81434	2.01638		ENSG00000147533	GOLGA7	52.212	28.5412	5646.06	1908.94
	ENSG00000005302	MSL3	37.6429	1.23899	19.3689	19.4169		ENSG00000005379	TSPOAP1	1.35257	1.65553	1.15474	1.38761		ENSG00000005436	GCFC2	3.37551	4.24482	3.77961	3.79998		ENSG00000138172	CALHM2	48.2397	26.5605	5646.69	1907.16
	ENSG00000005339	CREBBP	18.5098	5.74216	1.26527	8.50573		ENSG00000005436	GCFC2	3.15461	1.24715	1.42193	1.94123		ENSG00000005448	WDR54	5.90309	7.656	5.97456	6.51122		ENSG00000089048	ESF1	61.7846	21.8606	5586.76	1890.13
	ENSG00000005379	TSPOAP1	1.91657	5.89006	6.00247	4.60303		ENSG00000005448	WDR54	4.94209	2.98598	2.77763	3.56857		ENSG00000005483	KMT2E	43.8373	34.6372	45.0389	41.1711		ENSG00000104980	TIMM44	138.209	5367.96	156.218	1887.46
	ENSG00000005436	GCFC2	6.29043	41.7346	5.80457	17.9432		ENSG00000005483	KMT2E	37.8882	4.58028	4.79153	15.7533		ENSG00000005486	RHBDD2	44.7112	37.485	35.5414	39.2459		ENSG00000138092	CENPO	40.3914	5579.98	8.61694	1876.33
	ENSG00000005448	WDR54	5.10728	55.1048	38.9726	33.0616		ENSG00000005486	RHBDD2	39.2867	40.9788	37.2594	39.1749		ENSG00000005700	IBTK	10.1379	9.06561	7.16094	8.78816		ENSG00000137070	IL11RA	1.77248	28.3537	5596.56	1875.56
	ENSG00000005483	KMT2E	39.1679	21.9005	55.3853	38.8179		ENSG00000005700	IBTK	9.44463	38.6488	39.2678	29.1204		ENSG00000005801	ZNF195	14.4652	14.7598	15.098	14.7743		ENSG00000137154	RPS6	5607.38	11.6156	3.91687	1874.3
	ENSG00000005486	RHBDD2	53.3564	17.9861	22.3359	31.2262		ENSG00000005801	ZNF195	12.2874	10.2339	9.97913	10.8335		ENSG00000005810	MYCBP2	53.4362	47.3596	72.2083	57.668		ENSG00000147604	RPL7	5530.75	6.12722	50.6801	1862.52
	ENSG00000005700	IBTK	20.8815	80.6445	17.2168	39.5809		ENSG00000005810	MYCBP2	46.2205	15.1472	13.2119	24.8599		ENSG00000005812	FBXL3	23.8321	25.6811	25.3779	24.9637		ENSG00000104964	TLE5	188.185	4.7492	5391.41	1861.45
	ENSG00000005801	ZNF195	19.3335	40.8952	82.8774	47.702		ENSG00000005812	FBXL3	25.0579	58.2034	45.6968	42.9861		ENSG00000005844	ITGAL	231.007	217.586	234.263	227.618		ENSG00000063177	RPL18	5481.6	5.47106	16.7647	1834.61
	ENSG00000005810	MYCBP2	74.7755	239.929	38.8854	117.863		ENSG00000005844	ITGAL	225.003	26.1108	24.9187	92.0108		ENSG00000005882	PDK2	4.94868	4.77872	5.42366	5.05035		ENSG00000140829	DHX38	55.4453	5425.33	2.03567	1827.6
	ENSG00000005812	FBXL3	40.7522	8.29698	224.658	91.2358		ENSG00000005882	PDK2	4.48569	228.188	228.148	153.607		ENSG00000005884	ITGA3	12.8035	12.5082	12.0692	12.4603		ENSG00000070669	ASNS	56.3107	2577.09	2800.2	1811.2
	ENSG00000005844	ITGAL	224.554	15.5416	6.99913	82.365		ENSG00000005884	ITGA3	11.8484	5.23346	5.31204	7.46464		ENSG00000005889	ZFX	16.0046	12.7433	16.1003	14.9494		ENSG00000105472	CLEC11A	331.505	23.0328	5003.58	1786.04
	ENSG00000005882	PDK2	7.94616	19.5018	14.4803	13.9761		ENSG00000005889	ZFX	16.8785	10.0472	10.411	12.4456		ENSG00000005893	LAMP2	89.8774	88.7903	90.2448	89.6375		ENSG00000171861	MRM3	19.544	5307.17	11.7746	1779.5
	ENSG00000005884	ITGA3	14.781	111.806	20.1498	48.9124		ENSG00000005893	LAMP2	90.7581	17.1543	16.8789	41.5971		ENSG00000006007	GDE1	70.3153	69.8356	70.7147	70.2885		ENSG00000205542	TMSB4X	5315.54	6.16881	2.38617	1774.7
	ENSG00000005889	ZFX	19.7602	80.401	104.32	68.1602		ENSG00000006007	GDE1	69.7334	94.7379	98.8763	87.7825		ENSG00000006015	REX1BD	7.70342	15.0532	12.5327	11.7631		ENSG00000107957	SH3PXD2A	45.189	95.9069	5158.21	1766.44
	ENSG00000005893	LAMP2	109.002	20.5799	80.6764	70.0862		ENSG00000006015	REX1BD	9.98594	71.3996	72.414	51.2665		ENSG00000006016	CRLF1	3.17943	5.44173	4.6304	4.41719		ENSG00000133112	TPT1	5178.83	54.9826	46.8304	1760.21
	ENSG00000006007	GDE1	83.4067	6.22994	19.353	36.3299		ENSG00000006016	CRLF1	3.1799	7.62324	8.99669	6.59994		ENSG00000006025	OSBPL7	11.4816	12.7007	13.8015	12.6613		ENSG00000205084	TMEM231	3.24433	2.63835	5267.36	1757.75
	ENSG00000006015	REX1BD	21.8095	10.7978	5.0579	12.5551		ENSG00000006025	OSBPL7	11.6013	5.81201	3.26615	6.89315		ENSG00000006062	MAP3K14	5.63521	2.56469	6.84866	5.01619		ENSG00000142330	CAPN10	11.5208	5175.29	80.1519	1755.66
	ENSG00000006016	CRLF1	4.80276	5.96039	11.9402	7.56778		ENSG00000006062	MAP3K14	3.27131	10.606	10.2949	8.05741		ENSG00000006125	AP2B1	58.4271	57.1419	59.4301	58.333		ENSG00000140988	RPS2	5136.64	93.3903	18.3828	1749.47
	ENSG00000006025	OSBPL7	10.5255	91.3477	5.39474	35.756		ENSG00000006125	AP2B1	58.1048	3.23535	3.8864	21.7422		ENSG00000006194	ZNF263	12.6115	20.8745	20.2585	17.9148		ENSG00000105518	TMEM205	52.9286	5116.97	73.4044	1747.77
	ENSG00000006062	MAP3K14	5.80666	26.0917	90.1085	40.669		ENSG00000006194	ZNF263	18.168	54.597	58.6678	43.811		ENSG00000006282	SPATA20	11.171	10.0465	12.3695	11.1957		ENSG00000205221	VIT	3.22491	5233.58	2.62874	1746.48
	ENSG00000006125	AP2B1	90.2034	11.1954	26.056	42.4849		ENSG00000006282	SPATA20	10.0908	17.5783	17.9698	15.213		ENSG00000006327	TNFRSF12A	16.919	20.1078	22.3426	19.7898		ENSG00000105640	RPL18A	5053.23	59.9653	62.857	1725.35
	ENSG00000006194	ZNF263	25.9633	49.4064	11.6202	28.9966		ENSG00000006327	TNFRSF12A	15.6932	10.3081	9.11285	11.7047		ENSG00000006432	MAP3K9	1.36745	48.1594	49.9597	33.1622		ENSG00000171792	RHNO1	33.7084	24.1478	5103.96	1720.6
	ENSG00000006282	SPATA20	11.6874	1.33015	50.231	21.0829		ENSG00000006432	MAP3K9	1.66663	14.7967	14.905	10.4561		ENSG00000006451	RALA	44.4971	11.6428	6.79679	20.9789		ENSG00000071054	MAP4K4	78.7784	5036.3	9.49637	1708.19
	ENSG00000006327	TNFRSF12A	55.7771	77.7724	1.22827	44.9259		ENSG00000006451	RALA	49.25	1.24015	1.43441	17.3082		ENSG00000006453	BAIAP2L1	9.17848	2.32742	3.20928	4.90506		ENSG00000134283	PPHLN1	56.4811	4552.87	502.716	1704.02
	ENSG00000006432	MAP3K9	1.46117	14.5788	78.336	31.4587		ENSG00000006453	BAIAP2L1	7.80412	47.4973	46.7418	34.0144		ENSG00000006459	KDM7A	1.767	6.17539	9.04826	5.66355		ENSG00000108021	TASOR2	11.1013	5082.11	3.75909	1698.99
	ENSG00000006451	RALA	86.7605	6.72012	15.9798	36.4868		ENSG00000006459	KDM7A	2.06245	8.13165	8.24111	6.14507		ENSG00000006468	ETV1	1.17544	67.6278	69.3718	46.0584		ENSG00000197852	INKA2	4.35583	5066.64	14.1611	1695.05
	ENSG00000006453	BAIAP2L1	13.8033	12.7172	6.66411	11.0616		ENSG00000006530	AGK	6.86776	2.74528	2.52219	4.04508		ENSG00000006530	AGK	8.95078	19.7546	17.3951	15.3668		ENSG00000143727	ACP1	123.777	4906.65	39.2917	1689.9
	ENSG00000006459	KDM7A	6.28508	80.4249	12.3715	33.0271		ENSG00000006534	ALDH3B1	61.4984	7.66665	6.14413	25.1031		ENSG00000006534	ALDH3B1	65.0204	5.64665	2.45977	24.3756		ENSG00000171863	RPS7	4981.08	62.9614	3.19536	1682.41
	ENSG00000006530	AGK	11.7893	35.1848	79.1798	42.0513		ENSG00000006576	PHTF2	21.3956	60.6872	60.4892	47.524		ENSG00000006576	PHTF2	17.5216	205.483	219.407	147.471		ENSG00000071082	RPL31	4796.18	11.8999	214.253	1674.11
	ENSG00000006534	ALDH3B1	79.547	4.7042	35.8539	40.035		ENSG00000006607	FARP2	3.38469	23.9335	19.1785	15.4989		ENSG00000006607	FARP2	3.37749	56.4478	44.8223	34.8825		ENSG00000142513	ACP4	2.33398	18.7277	4996.09	1672.38
	ENSG00000006576	PHTF2	33.5916	324.346	4.28343	120.74		ENSG00000006625	GGCT	205.425	4.1357	2.83677	70.7992		ENSG00000006625	GGCT	217.845	30.5303	29.487	92.6208		ENSG00000108298	RPL19	4981.19	5.98217	26.0025	1671.06
	ENSG00000006607	FARP2	5.31878	95.7556	313.134	138.069		ENSG00000006634	DBF4	56.4582	219.256	212.002	162.572		ENSG00000006634	DBF4	53.0562	29.8949	27.4518	36.801		ENSG00000170832	USP32	30.8407	5.36875	4884.88	1640.36
	ENSG00000006625	GGCT	296.438	20.4659	89.2204	135.375		ENSG00000006638	TBXA2R	27.7781	49.7838	63.132	46.898		ENSG00000006638	TBXA2R	26.3316	7.16397	9.04751	14.181		ENSG00000197958	RPL12	4852.62	14.4064	10.9415	1625.99
	ENSG00000006634	DBF4	86.5363	40.7497	22.3214	49.8691		ENSG00000006652	IFRD1	31.4077	14.3668	13.3924	19.7223		ENSG00000006652	IFRD1	29.8609	54.1982	60.0068	48.022		ENSG00000143786	CNIH3	6.49735	38.2671	4803.14	1615.97
	ENSG00000006638	TBXA2R	19.7355	13.8194	39.7621	24.439		ENSG00000006695	COX10	8.96719	30.2674	30.7329	23.3225		ENSG00000006695	COX10	9.26325	51.9607	58.042	39.7553		ENSG00000142676	RPL11	4753.02	45.2366	18.3414	1605.53
	ENSG00000006652	IFRD1	42.7377	75.3316	14.785	44.2848		ENSG00000006712	PAF1	60.4787	8.90364	8.08778	25.8234		ENSG00000006712	PAF1	57.5509	34.0281	40.1705	43.9165		ENSG00000134308	YWHAQ	161.209	10.9006	4557.26	1576.46
	ENSG00000006695	COX10	13.2682	73.2321	75.56	54.0201		ENSG00000006715	VPS41	58.6328	57.1222	54.5203	56.7584		ENSG00000006715	VPS41	55.5899	11.7435	15.1793	27.5042		ENSG00000170876	TMEM43	58.8939	4664.79	1.90464	1575.19
	ENSG00000006712	PAF1	77.2026	60.45	73.0417	70.2314		ENSG00000006744	ELAC2	35.0282	64.5774	58.06	52.5552		ENSG00000006744	ELAC2	41.0222	51.6752	51.3922	48.0299		ENSG00000197776	KLHDC1	1.81393	2.26035	4717.54	1573.87
	ENSG00000006715	VPS41	73.2502	14.1865	51.8719	46.4362		ENSG00000006756	ARSD	12.58	34.5238	27.0681	24.724		ENSG00000006756	ARSD	14.4798	2.64036	33.9526	17.0242		ENSG00000145425	RPS3A	4660.9	8.69233	22.6018	1564.06
	ENSG00000006744	ELAC2	50.2763	67.3574	12.7405	43.4581		ENSG00000006831	ADIPOR2	48.8608	12.7082	12.2713	24.6134		ENSG00000006831	ADIPOR2	53.1122	30.7179	166.34	83.39		ENSG00000145217	SLC26A1	2.57321	4650.84	6.57531	1553.33
	ENSG00000006756	ARSD	13.0402	2.61543	69.3892	28.3483		ENSG00000006837	CDKL3	2.01323	51.4493	52.0361	35.1662		ENSG00000006837	CDKL3	1.69461	158.959	3.12075	54.5915		ENSG00000114391	RPL24	4556.55	15.5954	25.874	1532.67
	ENSG00000006831	ADIPOR2	67.5818	42.4307	2.17492	37.3958		ENSG00000007047	MARK4	28.856	1.71018	1.23611	10.6008		ENSG00000007047	MARK4	30.7605	4.98428	37.7979	24.5142		ENSG00000136854	STXBP1	39.2016	4362.94	188.643	1530.26
	ENSG00000006837	CDKL3	2.47101	173.901	45.4843	73.9521		ENSG00000007080	CCDC124	139.167	30.6561	28.0238	65.949		ENSG00000007080	CCDC124	154.646	37.6294	65.1421	85.8057		ENSG00000266714	MYO15B	13.2655	4544.54	5.33285	1521.05
	ENSG00000007047	MARK4	40.3891	3.77023	175.82	73.3266		ENSG00000007129	CEACAM21	3.53382	133.812	133.361	90.2355		ENSG00000007129	CEACAM21	6.75106	61.0347	84.2072	50.6643		ENSG00000167967	E4F1	21.9365	1247.76	3273.12	1514.27
	ENSG00000007080	CCDC124	183.974	52.7996	4.97236	80.5821		ENSG00000007168	PAFAH1B1	37.9572	3.99895	2.91357	14.9566		ENSG00000007168	PAFAH1B1	39.3595	71.2147	91.8018	67.4587		ENSG00000148090	AUH	9.12336	4506.04	4.22226	1506.46
	ENSG00000007129	CEACAM21	3.22761	79.6658	52.1981	45.0305		ENSG00000007202	BLTP2	61.7071	38.3322	37.8935	45.9776		ENSG00000007202	BLTP2	62.8658	84.3583	10.3736	52.5326		ENSG00000148229	POLE3	71.5784	47.586	4396.46	1505.21
	ENSG00000007168	PAFAH1B1	53.0846	100.551	79.1015	77.579		ENSG00000007237	GAS7	92.0924	59.1673	55.6174	68.959		ENSG00000007237	GAS7	80.9116	11.2963	30.8116	41.0065		ENSG00000170889	RPS9	4469.59	19.589	7.78204	1498.99
	ENSG00000007202	BLTP2	76.3058	78.7431	96.6209	83.8899		ENSG00000007255	TRAPPC6A	72.6081	73.7094	82.407	76.2415		ENSG00000007255	TRAPPC6A	86.0486	33.8311	36.2391	52.0396		ENSG00000083845	RPS5	4448.61	17.6141	26.5638	1497.59
	ENSG00000007237	GAS7	95.6736	14.9457	77.1903	62.6032		ENSG00000007341	ST7L	9.1626	70.4632	72.4403	50.6887		ENSG00000007341	ST7L	10.7155	2.9749	35.5719	16.4208		ENSG00000134419	RPS15A	4450.36	36.5325	1.74744	1496.21
	ENSG00000007255	TRAPPC6A	77.6104	39.3614	13.6403	43.5374		ENSG00000007376	RPUSD1	29.77	10.624	10.2189	16.871		ENSG00000007376	RPUSD1	30.1665	35.871	11.5795	25.8723		ENSG00000143947	RPS27A	4347.91	20.3216	113.929	1494.05
	ENSG00000007341	ST7L	12.4611	1.32682	38.018	17.2686		ENSG00000007384	RHBDF1	1.26934	28.8698	28.0807	19.4066		ENSG00000007392	LUC7L	32.801	28.2875	15.7379	25.6088		ENSG00000136942	RPL35	4373.53	4.83046	75.4895	1484.62
	ENSG00000007376	RPUSD1	40.5362	31.5941	1.50838	24.5462		ENSG00000007392	LUC7L	36.8106	2.90839	1.78185	13.8336		ENSG00000007520	TSR3	29.7414	7.75557	2.75744	13.4181		ENSG00000148303	RPL7A	4293.16	105.668	24.722	1474.52
	ENSG00000007392	LUC7L	29.4929	41.1826	30.1884	33.6213		ENSG00000007520	TSR3	27.5811	37.272	35.2737	33.3756		ENSG00000007541	PIGQ	9.02	19.7922	48.7925	25.8682		ENSG00000071073	MGAT4A	9.67277	158.552	4240.02	1469.42
	ENSG00000007520	TSR3	48.5953	16.8069	43.3066	36.2362		ENSG00000007541	PIGQ	7.80858	24.9629	26.4014	19.7243		ENSG00000007545	CRAMP1	17.3328	2.60941	32.0935	17.3452		ENSG00000204514	ZNF814	11.3973	60.448	4330.46	1467.44
	ENSG00000007541	PIGQ	17.1989	16.7991	14.631	16.2096		ENSG00000007545	CRAMP1	10.4738	8.65773	7.12503	8.75217		ENSG00000007866	TEAD3	2.42996	48.1952	8.11186	19.579		ENSG00000265681	RPL17	4396.35	2.10454	1.85281	1466.77
	ENSG00000007545	CRAMP1	16.2514	4.49674	17.505	12.751		ENSG00000007866	TEAD3	2.09712	15.8718	16.7727	11.5805		ENSG00000007923	DNAJC11	53.517	30.6578	172.284	85.4861		ENSG00000197756	RPL37A	4343.33	6.28219	36.2339	1461.95
	ENSG00000007866	TEAD3	4.72566	63.8711	4.39976	24.3322		ENSG00000007923	DNAJC11	44.5157	2.22162	2.48425	16.4072		ENSG00000007944	MYLIP	33.049	7.35731	31.7157	24.0407		ENSG00000177542	SLC25A22	11.9561	4340.47	27.3062	1459.91
	ENSG00000007923	DNAJC11	61.3024	35.328	61.2531	52.6278		ENSG00000007944	MYLIP	28.4644	46.6353	46.5483	40.5493		ENSG00000007968	E2F2	7.94083	184.061	61.123	84.3749		ENSG00000204628	RACK1	4355.44	7.34728	4.76379	1455.85
	ENSG00000007944	MYLIP	34.1132	14.432	34.1927	27.5793		ENSG00000007968	E2F2	7.13551	30.3634	31.1151	22.8713		ENSG00000008018	PSMB1	156.695	29.0773	95.4015	93.7246		ENSG00000177600	RPLP2	4329.19	34.633	2.06613	1455.29
	ENSG00000007968	E2F2	14.6081	200.194	14.8393	76.5473		ENSG00000008018	PSMB1	160.66	7.73081	7.2457	58.5456		ENSG00000008083	JARID2	31.9795	1.99471	25.7729	19.9157		ENSG00000162104	ADCY9	9.57749	19.0597	4336.35	1454.99
	ENSG00000008018	PSMB1	190.586	41.0445	221.32	150.983		ENSG00000008083	JARID2	29.5278	158.853	162.087	116.823		ENSG00000008086	CDKL5	1.42762	65.7648	3.41593	23.5361		ENSG00000131469	RPL27	4058.49	206.845	62.5884	1442.64
	ENSG00000008083	JARID2	41.2546	1.32951	39.0792	27.2211		ENSG00000008086	CDKL5	1.2118	29.3252	31.3534	20.6301		ENSG00000008128	CDK11A	57.6552	95.4826	44.2264	65.7881		ENSG00000265370	MIR4682	3.7083	5.1307	4298.67	1435.84
	ENSG00000008086	CDKL5	1.52684	55.4558	1.45398	19.4789		ENSG00000008128	CDK11A	64.91	1.15657	62.0358	42.7008		ENSG00000008130	NADK	79.5117	24.4739	6.86548	36.9504		ENSG00000198663	C6orf89	31.391	4243.07	13.0646	1429.17
	ENSG00000008128	CDK11A	51.6775	72.6052	52.021	58.7679		ENSG00000008130	NADK	86.8557	66.0896	73.4003	75.4485		ENSG00000008256	CYTH3	24.8563	5.50429	37.79	22.7168		ENSG00000187187	ZNF546	2.46702	4256	14.2576	1424.24
	ENSG00000008130	NADK	68.1714	34.979	73.8987	59.0164		ENSG00000008256	CYTH3	24.1575	91.563	24.1366	46.6191		ENSG00000008277	ADAM22	3.55798	48.7475	10.027	20.7775		ENSG00000105193	RPS16	4045.01	27.0603	194.708	1422.26
	ENSG00000008256	CYTH3	35.441	6.60506	34.2158	25.4206		ENSG00000008277	ADAM22	4.29985	24.065	5.61857	11.3278		ENSG00000008282	SYPL1	41.27	9.54112	4.40353	18.4049		ENSG00000162244	RPL29	4196.31	39.0948	9.41746	1414.94
	ENSG00000008277	ADAM22	5.53818	61.3746	6.59038	24.5011		ENSG00000008282	SYPL1	42.4989	4.91061	45.3115	30.907		ENSG00000008283	CYB561	7.33711	39.0471	40.5324	28.9722		ENSG00000131269	ABCB7	35.8985	78.9977	4127.59	1414.16
	ENSG00000008282	SYPL1	60.8455	10.2744	60.7257	43.9485		ENSG00000008283	CYB561	5.70468	43.7621	5.47074	18.3125		ENSG00000008294	SPAG9	37.404	13.4416	10.4437	20.4298		ENSG00000136878	USP20	38.7442	18.4717	4176.01	1411.07
	ENSG00000008283	CYB561	11.5262	63.2256	11.0325	28.5948		ENSG00000008294	SPAG9	41.8885	7.96907	42.6271	30.8282		ENSG00000008300	CELSR3	11.0695	3.36145	146.115	53.5153		ENSG00000204520	MICA	17.5666	4196.89	13.962	1409.47
	ENSG00000008294	SPAG9	60.9878	6.95728	56.6344	41.5265		ENSG00000008300	CELSR3	8.48732	45.4773	9.08902	21.0179		ENSG00000008311	AASS	4.00562	29.3386	26.1148	19.8197		ENSG00000088876	ZNF343	9.0846	4.66144	4157.85	1390.53
	ENSG00000008300	CELSR3	7.18271	2.90885	6.69331	5.59496		ENSG00000008311	AASS	2.98871	8.6822	2.79626	4.82239		ENSG00000008324	SS18L2	38.9087	10.642	7.90017	19.1503		ENSG00000122034	GTF3A	146.67	4015.73	4.80043	1389.07
	ENSG00000008311	AASS	3.21946	24.602	3.40587	10.4091		ENSG00000008324	SS18L2	16.9919	3.39699	18.0102	12.7997		ENSG00000008382	MPND	14.7197	157.016	49.6589	73.7982		ENSG00000089009	RPL6	4147.84	2.50735	5.3673	1385.24
	ENSG00000008324	SS18L2	45.6361	8.64044	51.4421	35.2395		ENSG00000008382	MPND	4.52151	17.2762	6.13819	9.31196		ENSG00000008394	MGST1	174.897	21.4991	42.9264	79.7741		ENSG00000117748	RPA2	100.922	4040.68	1.6534	1381.09
	ENSG00000008382	MPND	6.30014	140.431	6.85525	51.1954		ENSG00000008394	MGST1	152.756	5.10699	176.489	111.451		ENSG00000008405	CRY1	22.3316	7.18458	299.497	109.671		ENSG00000122180	MYOG	2.44482	9.02845	4130.1	1380.52
	ENSG00000008394	MGST1	130.743	34.3345	128.96	98.0126		ENSG00000008405	CRY1	22.6252	161.586	22.5362	68.9159		ENSG00000008441	NFIX	7.9486	51.6849	51.0645	36.8993		ENSG00000118181	RPS25	4123.35	1.99388	8.08422	1377.81
	ENSG00000008405	CRY1	35.7229	11.9876	33.6054	27.1053		ENSG00000008441	NFIX	6.93422	23.1205	6.38486	12.1465		ENSG00000008513	ST3GAL1	51.2028	41.8948	3.46812	32.1886		ENSG00000145337	PYURF	15.9365	22.2275	4085.96	1374.71
	ENSG00000008441	NFIX	14.7917	54.7392	12.4748	27.3352		ENSG00000008513	ST3GAL1	50.7563	7.10104	51.0546	36.304		ENSG00000008516	MMP25	27.8001	354.044	40.4515	140.765		ENSG00000122406	RPL5	4064.95	15.3093	18.4	1366.22
	ENSG00000008513	ST3GAL1	50.2819	57.3598	52.0472	53.2296		ENSG00000008516	MMP25	38.0973	51.2375	21.6268	36.9872		ENSG00000008517	IL32	309.163	25.353	14.2314	116.249		ENSG00000111640	GAPDH	3913.27	141.196	41.4575	1365.31
	ENSG00000008516	MMP25	61.2982	407.118	64.4568	177.624		ENSG00000008517	IL32	282.509	27.8005	306.899	205.736		ENSG00000008710	PKD1	18.5635	3.82875	20.708	14.3667		ENSG00000111371	SLC38A1	37.8541	4011.15	25.61	1358.2
	ENSG00000008517	IL32	393.013	33.7304	390.6	272.448		ENSG00000008710	PKD1	24.5347	292.094	35.6734	117.434		ENSG00000008735	MAPK8IP2	3.02732	41.8731	52.0687	32.3231		ENSG00000088970	KIZ	12.8861	4029.83	24.9353	1355.88
	ENSG00000008710	PKD1	40.5474	2.01684	35.7064	26.0902		ENSG00000008735	MAPK8IP2	2.99644	42.7358	3.54735	16.4265		ENSG00000008838	MED24	56.2811	12.5776	11120.9	3729.92		ENSG00000177272	KCNA3	12.5855	4.1317	4031.63	1349.45
	ENSG00000008735	MAPK8IP2	2.47219	48.0446	2.16943	17.5621		ENSG00000008838	MED24	44.3183	3.76816	42.736	30.2742		ENSG00000008853	RHOBTB2	14.2347	25.1937	267.502	102.31		ENSG00000229117	RPL41	4025.34	1.7346	8.82909	1345.3
	ENSG00000008838	MED24	51.2058	18.3103	54.3149	41.277		ENSG00000008853	RHOBTB2	13.3009	46.3724	14.8496	24.841		ENSG00000008869	HEATR5B	19.5548	50.6231	21.3983	30.5254		ENSG00000186951	PPARA	6.25368	2.90424	3999.45	1336.2
	ENSG00000008853	RHOBTB2	17.8317	25.3328	18.2775	20.4807		ENSG00000008869	HEATR5B	19.7234	13.9895	20.221	17.978		ENSG00000008952	SEC62	53.485	11626.8	6.57634	3895.64		ENSG00000111424	VDR	3.3682	151.394	3849.61	1334.79
	ENSG00000008869	HEATR5B	21.1688	63.8787	18.2948	34.4474		ENSG00000008952	SEC62	72.2085	19.2262	57.8277	49.7541		ENSG00000008988	RPS20	11169.2	253.304	4.45746	3809		ENSG00000187514	PTMA	3948.59	48.1139	7.04375	1334.58
	ENSG00000008952	SEC62	60.6472	6906.82	61.909	2343.13		ENSG00000008988	RPS20	11201.7	56.083	11170.4	7476.05		ENSG00000009307	CSDE1	277.582	19.9021	68.3241	121.936		ENSG00000117877	POLR1G	25.6375	10.9694	3933.94	1323.51
	ENSG00000008988	RPS20	6776.77	327.478	6894.71	4666.32		ENSG00000009307	CSDE1	266.134	11051.6	268.955	3862.24		ENSG00000009335	UBE3C	22.8235	4.29206	5.38804	10.8345		ENSG00000198034	RPS4X	3851.21	2.24199	84.9207	1312.79
	ENSG00000009307	CSDE1	282.767	36.4544	290.393	203.205		ENSG00000009335	UBE3C	22.8375	282.147	21.6729	108.886		ENSG00000009413	REV3L	9.32587	6.18371	14.3935	9.96768		ENSG00000131187	F12	6.61007	3910.8	14.0584	1310.49
	ENSG00000009335	UBE3C	36.123	7.95632	36.7761	26.9518		ENSG00000009413	REV3L	4.95831	21.9603	7.76897	11.5625		ENSG00000009780	FAM76A	6.25702	61.3864	100.163	55.9354		ENSG00000211459	MT-RNR1	3874.4	27.4248	11.6767	1304.5
	ENSG00000009413	REV3L	7.22724	8.09835	7.83974	7.72178		ENSG00000009724	MASP2	1.35672	8.98888	7.77099	6.03886		ENSG00000009790	TRAF3IP3	68.0835	4.59825	29.1195	33.9337		ENSG00000228434	-	3.24195	3806.82	5.45942	1271.84
	ENSG00000009780	FAM76A	7.6387	82.1437	3.92407	31.2355		ENSG00000009780	FAM76A	6.04799	8.13612	65.4124	26.5322		ENSG00000009830	POMT2	5.59979	15.0246	8.18057	9.60165		ENSG00000197879	MYO1C	6.30646	10.9606	3794.43	1270.57
	ENSG00000009790	TRAF3IP3	77.7073	7.74763	7.28114	30.912		ENSG00000009790	TRAF3IP3	65.8877	68.9591	6.16284	47.0032		ENSG00000009844	VTA1	18.969	89.3042	17.5027	41.9253		ENSG00000198755	RPL10A	3675	88.7309	22.9677	1262.23
	ENSG00000009830	POMT2	7.41486	24.3034	73.9372	35.2185		ENSG00000009830	POMT2	5.17998	4.73737	17.2312	9.04952		ENSG00000009954	BAZ1B	100.327	32.2688	44.2399	58.9453		ENSG00000121749	TBC1D15	42.8123	3675.17	45.1722	1254.39
	ENSG00000009844	VTA1	24.5495	152.405	8.58173	61.8455		ENSG00000009844	VTA1	16.111	17.7942	99.7833	44.5628		ENSG00000010017	RANBP9	31.2506	7.04205	79.668	39.3202		ENSG00000197951	ZNF71	11.7614	3720.61	9.16407	1247.18
	ENSG00000009954	BAZ1B	149.29	45.5287	21.8603	72.2263		ENSG00000009954	BAZ1B	97.8126	100.954	34.9204	77.8957		ENSG00000010072	SPRTN	8.19037	14.4419	317.182	113.272		ENSG00000121864	ZNF639	19.2376	53.1914	3656.4	1242.94
	ENSG00000010017	RANBP9	44.5427	14.4099	145.592	68.1816		ENSG00000010017	RANBP9	31.039	31.6085	7.52506	23.3909		ENSG00000010165	METTL13	16.0264	48.286	64.2072	42.8399		ENSG00000074660	SCARF1	2.80837	1825.59	1862.9	1230.43
	ENSG00000010072	SPRTN	14.6278	27.1233	43.6144	28.4552		ENSG00000010072	SPRTN	6.89461	8.37712	17.8758	11.0492		ENSG00000010219	DYRK4	52.5048	73.1743	131.083	85.5875		ENSG00000186230	ZNF749	7.71198	6.26278	3654.03	1222.67
	ENSG00000010165	METTL13	25.359	50.9328	14.2538	30.1819		ENSG00000010165	METTL13	16.4889	15.8308	45.4951	25.9383		ENSG00000010244	ZNF207	88.4518	303.966	33.0238	141.814		ENSG00000228451	SDAD1P1	11.508	2.53399	3637.92	1217.32
	ENSG00000010219	DYRK4	45.8165	85.3559	26.8047	52.659		ENSG00000010219	DYRK4	48.4081	53.2222	78.3167	59.9823		ENSG00000010256	UQCRC1	320.367	68.8293	46.768	145.321		ENSG00000122026	RPL21	3495.9	10.8687	55.5865	1187.45
	ENSG00000010244	ZNF207	83.6925	439.292	46.8812	189.955		ENSG00000010244	ZNF207	79.7923	83.7946	269.488	144.358		ENSG00000010270	STARD3NL	70.589	135.058	2.11399	69.2537		ENSG00000198677	SKIC3	20.9942	5.71195	3469.53	1165.41
	ENSG00000010256	UQCRC1	437.403	101.695	88.3542	209.151		ENSG00000010256	UQCRC1	263.809	249.478	73.9901	195.759		ENSG00000010292	NCAPD2	137.041	32.4179	65.9881	78.4824		ENSG00000198846	TOX	1.82928	1.9224	3439.73	1147.83
	ENSG00000010270	STARD3NL	100.892	155.763	436.426	231.027		ENSG00000010270	STARD3NL	61.6028	64.4811	134.779	86.9543		ENSG00000010295	IFFO1	30.1349	45.9495	16.4891	30.8578		ENSG00000182648	RNF32-DT	6.91536	3390.58	14.0051	1137.17
	ENSG00000010292	NCAPD2	143.262	21.7763	100.439	88.4923		ENSG00000010292	NCAPD2	135.936	136.404	31.6069	101.316		ENSG00000010318	PHF7	44.1066	1.74035	11.4374	19.0948		ENSG00000186352	ANKRD37	20.0069	3369.12	13.4945	1134.21
	ENSG00000010295	IFFO1	23.2756	56.3679	154.977	78.2068		ENSG00000010295	IFFO1	33.8015	32.17	42.9054	36.2923		ENSG00000010319	SEMA3G	1.59729	69.4282	279.255	116.76		ENSG00000144713	RPL32	3341.99	7.13235	41.2095	1130.11
	ENSG00000010318	PHF7	55.1523	3.58299	22.6291	27.1214		ENSG00000010310	GIPR	1.31466	46.8187	1.72961	16.621		ENSG00000010322	NISCH	72.2563	7.55187	12.6976	30.8353		ENSG00000167658	EEF2	3340.75	36.6262	2.11046	1126.5
	ENSG00000010319	SEMA3G	4.61821	80.2657	52.0271	45.637		ENSG00000010318	PHF7	41.5413	1.43462	66.5504	36.5088		ENSG00000010404	IDS	10.2546	11.6018	45.8577	22.5714		ENSG00000198918	RPL39	3371.08	2.31759	5.0862	1126.16
	ENSG00000010322	NISCH	81.9558	21.7854	4.37622	36.0391		ENSG00000010319	SEMA3G	1.58218	72.0072	7.24728	26.9455		ENSG00000010539	ZNF200	11.432	294.8	38.3016	114.845		ENSG00000167566	NCKAP5L	5.10061	10.683	3356.04	1123.94
	ENSG00000010404	IDS	18.5003	15.8978	76.8188	37.0723		ENSG00000010322	NISCH	70.9346	18.4743	9.33028	32.9131		ENSG00000010610	CD4	305.185	10.5685	10.4367	108.73		ENSG00000100448	CTSG	3325.15	32.8299	8.18914	1122.06
	ENSG00000010539	ZNF200	17.5713	240.098	19.8876	92.5188		ENSG00000010404	IDS	17.7018	11.1402	291.154	106.665		ENSG00000010626	LRRC23	8.48289	42.691	4.77001	18.648		ENSG00000186468	RPS23	3308.3	47.9928	6.74836	1121.01
	ENSG00000010610	CD4	236.767	8.97027	16.88	87.5392		ENSG00000010539	ZNF200	9.09044	297.818	9.14792	105.352		ENSG00000010671	BTK	40.951	48.6119	13.4845	34.3491		ENSG00000198870	STKLD1	2.34465	3315.91	31.9865	1116.75
	ENSG00000010626	LRRC23	8.16364	67.5438	242.049	105.919		ENSG00000010610	CD4	298.379	10.0398	30.4059	112.941		ENSG00000010803	SCMH1	54.1182	8.82826	49.749	37.5652		ENSG00000198715	GLMP	8.3209	3331.01	7.44557	1115.59
	ENSG00000010671	BTK	58.5975	63.9175	9.12885	43.8813		ENSG00000010626	LRRC23	8.10691	41.8421	51.1213	33.6901		ENSG00000010810	FYN	10.4457	4.38354	12.486	9.1051		ENSG00000100417	PMM1	33.8828	12.142	3293.49	1113.17
	ENSG00000010803	SCMH1	62.9002	21.8354	65.1412	49.959		ENSG00000010671	BTK	40.1784	40.5865	12.3494	31.0381		ENSG00000010818	HIVEP2	5.85558	11.7699	110.084	42.5697		ENSG00000167615	LENG8	72.7621	3254.82	9.63493	1112.41
	ENSG00000010810	FYN	23.8399	6.21976	63.8407	31.3001		ENSG00000010803	SCMH1	41.0265	10.5958	4.48781	18.7033		ENSG00000011007	ELOA	12.5348	48.1238	41.4274	34.0287		ENSG00000197548	ATG7	35.3298	132.815	3147.55	1105.23
	ENSG00000010818	HIVEP2	5.82048	18.1304	23.0593	15.6701		ENSG00000010810	FYN	11.4499	4.27198	10.8999	8.87393		ENSG00000011009	LYPLA2	53.5351	10.6438	10.6776	24.9522		ENSG00000171766	GATM	1.81782	13.6616	3271.05	1095.51
	ENSG00000011007	ELOA	17.0753	59.4506	5.31938	27.2818		ENSG00000010818	HIVEP2	4.69609	12.5067	48.119	21.7739		ENSG00000011021	CLCN6	12.3079	106.808	15.6001	44.9054		ENSG00000171858	RPS21	3163.27	37.8369	79.6904	1093.6
	ENSG00000011009	LYPLA2	56.629	10.3336	17.5341	28.1656		ENSG00000011007	ELOA	12.188	45.4619	11.6361	23.0954		ENSG00000011028	MRC2	104.977	51.5991	6.18378	54.2533		ENSG00000100426	ZBED4	16.0469	3250.25	5.64853	1090.65
	ENSG00000011021	CLCN6	10.7371	106.939	62.5734	60.0831		ENSG00000011009	LYPLA2	47.7897	12.0812	86.187	48.686		ENSG00000011052	NME1-NME2	26.0055	1.36439	9.6373	12.3357		ENSG00000167984	NLRC3	5.95616	3205.14	42.3599	1084.48
	ENSG00000011028	MRC2	114.435	43.5467	10.702	56.2278		ENSG00000011021	CLCN6	10.445	88.075	28.7309	42.417		ENSG00000011114	BTBD7	10.699	11.0305	129.11	50.2797		ENSG00000182511	FES	92.1843	93.3216	3040.45	1075.32
	ENSG00000011052	NME1-NME2	44.4573	1.73278	110.081	52.0905		ENSG00000011028	MRC2	89.0684	22.0666	1.2937	37.4763		ENSG00000011132	APBA3	12.522	12.7606	12.1884	12.4903		ENSG00000137764	MAP2K5	23.0624	149.512	3026.66	1066.41
	ENSG00000011105	TSPAN9	1.93833	16.45	51.5633	23.3172		ENSG00000011052	NME1-NME2	29.6002	12.2958	11.2781	17.7247		ENSG00000011143	MKS1	7.60429	6.70842	45.9691	20.0939		ENSG00000168028	RPSA	2972.85	45.7617	155.329	1057.98
	ENSG00000011114	BTBD7	15.3214	19.6904	2.13417	12.382		ENSG00000011114	BTBD7	11.9048	11.7138	14.452	12.6902		ENSG00000011198	ABHD5	11.3954	12.2916	30.158	17.9483		ENSG00000164587	RPS14	2799.22	4.26963	295.29	1032.93
	ENSG00000011132	APBA3	19.0223	9.29301	15.3896	14.5683		ENSG00000011132	APBA3	14.0682	5.9813	5.62179	8.55709		ENSG00000011243	AKAP8L	99.9438	126.9	28.9544	85.2661		ENSG00000105258	POLR2I	39.3163	2974.63	79.6001	1031.18
	ENSG00000011143	MKS1	10.8166	16.1553	18.1734	15.0484		ENSG00000011143	MKS1	6.17543	11.0603	11.4077	9.5478		ENSG00000011258	MBTD1	11.1701	10.9784	168.5	63.5496		ENSG00000198064	NPIPB13	12.433	259.03	2785.96	1019.14
	ENSG00000011198	ABHD5	13.452	127.133	9.36238	49.9826		ENSG00000011198	ABHD5	10.7808	87.8346	105.784	68.1331		ENSG00000011260	UTP18	46.0445	41.791	7.49759	31.7777		ENSG00000110700	RPS13	2809.88	147.735	99.2379	1018.95
	ENSG00000011243	AKAP8L	158.168	16.448	13.634	62.7499		ENSG00000011243	AKAP8L	125.976	12.4395	12.2932	50.2364		ENSG00000011275	RNF216	30.556	31.9244	16.9843	26.4882		ENSG00000171848	RRM2	70.2082	2971.92	1.74264	1014.62
	ENSG00000011258	MBTD1	16.696	69.0739	139.284	75.018		ENSG00000011258	MBTD1	11.2247	44.8914	41.3839	32.5		ENSG00000011295	TTC19	31.0324	31.732	7.3197	23.3614		ENSG00000105372	RPS19	3019.34	4.34808	14.7276	1012.81
	ENSG00000011260	UTP18	66.0463	33.1415	16.4886	38.5588		ENSG00000011260	UTP18	45.4166	32.0446	31.2716	36.2442		ENSG00000011304	PTBP1	170.769	170.681	59.5087	133.653		ENSG00000137692	DCUN1D5	11.4936	2880.36	131.096	1007.65
	ENSG00000011275	RNF216	31.8029	46.9093	71.7371	50.1498		ENSG00000011275	RNF216	30.2887	32.8212	32.2812	31.797		ENSG00000011332	DPF1	7.0784	8.71985	68.7475	28.1819		ENSG00000164346	NSA2	80.6843	10.7843	2922.84	1004.77
	ENSG00000011295	TTC19	44.7838	273.669	31.6208	116.691		ENSG00000011295	TTC19	32.0001	145.85	155.314	111.055		ENSG00000011376	LARS2	16.1358	13.5571	15.7707	15.1546		ENSG00000105227	PRX	8.38852	10.0244	2979.38	999.264
	ENSG00000011304	PTBP1	288.741	7.98546	47.2168	114.648		ENSG00000011304	PTBP1	160.105	5.0261	5.31735	56.816		ENSG00000011405	PIK3C2A	5.02994	6.95155	14.9369	8.9728		ENSG00000110442	COMMD9	12.6012	2819.55	149.582	993.91
	ENSG00000011332	DPF1	7.76533	22.5344	264.988	98.4293		ENSG00000011332	DPF1	6.82629	13.0084	13.4347	11.0898		ENSG00000011422	PLAUR	70.3514	76.7993	21.6014	56.2507		ENSG00000174989	FBXW8	4.72485	2892.06	80.6331	992.473
	ENSG00000011376	LARS2	24.1768	9.69671	7.52335	13.7989		ENSG00000011376	LARS2	14.1339	8.0857	7.50098	9.90687		ENSG00000011426	ANLN	67.6294	66.5102	112.681	82.2736		ENSG00000198242	RPL23A	2969.76	1.70995	4.71999	992.063
	ENSG00000011405	PIK3C2A	9.32072	75.7107	23.8276	36.2863		ENSG00000011405	PIK3C2A	7.83657	53.7017	55.6518	39.0634		ENSG00000011451	WIZ	14.316	13.9214	4.67231	10.9699		ENSG00000175061	SNHG29	2934.57	4.303	15.1295	984.668
	ENSG00000011422	PLAUR	78.745	89.7975	10.0967	59.5464		ENSG00000011422	PLAUR	55.7849	68.4885	66.9461	63.7398		ENSG00000011454	RABGAP1	16.4945	13.2521	8.88541	12.8773		ENSG00000198133	TMEM229B	6.78608	2919.25	15.0196	980.353
	ENSG00000011426	ANLN	88.7602	19.6395	76.2893	61.563		ENSG00000011426	ANLN	65.7161	14.1219	14.0721	31.3034		ENSG00000011478	QPCTL	18.6171	22.5567	46.7744	29.3161		ENSG00000137818	RPLP1	2909.9	9.94921	11.605	977.15
	ENSG00000011451	WIZ	21.185	20.9119	91.3942	44.497		ENSG00000011451	WIZ	13.7767	15.5658	15.6946	15.0124		ENSG00000011485	PPP5C	109.254	107.815	33.6836	83.5842		ENSG00000174444	RPL4	2858.31	44.0757	10.1007	970.829
	ENSG00000011454	RABGAP1	20.1586	20.9739	22.3624	21.165		ENSG00000011454	RABGAP1	16.1649	16.5201	20.9267	17.8706		ENSG00000011523	CEP68	5.76665	3.53878	19.9185	9.74131		ENSG00000164338	UTP15	20.29	2874.26	16.1477	970.232
	ENSG00000011478	QPCTL	21.6865	128.731	21.6969	57.3714		ENSG00000011478	QPCTL	16.3661	93.5559	92.3822	67.4347		ENSG00000011566	MAP4K3	9.84658	8.55186	110.224	42.874		ENSG00000174839	DENND6A	12.9231	76.922	2807.17	965.672
	ENSG00000011485	PPP5C	132.521	5.95595	20.2864	52.9212		ENSG00000011485	PPP5C	92.9097	3.59059	4.13953	33.5466		ENSG00000011600	TYROBP	58.2453	59.9837	1.73238	39.9871		ENSG00000125485	DDX31	12.1082	2791.36	50.2192	951.23
	ENSG00000011523	CEP68	6.01509	11.6058	126.775	48.132		ENSG00000011523	CEP68	3.49808	9.10417	10.3072	7.63648		ENSG00000011638	LDAF1	33.6583	28.9467	13.119	25.2413		ENSG00000114784	EIF1B	75.0403	2717.99	55.9928	949.675
	ENSG00000011566	MAP4K3	13.1182	28.4255	6.00537	15.8497		ENSG00000011566	MAP4K3	10.948	47.6416	47.1318	35.2405		ENSG00000012048	BRCA1	20.8569	15.8338	16.415	17.7019		ENSG00000213654	GPSM3	111.496	4.63215	2719	945.042
	ENSG00000011600	TYROBP	23.7168	34.2513	12.2086	23.3923		ENSG00000011600	TYROBP	43.0902	31.3147	27.7196	34.0415		ENSG00000012061	ERCC1	104.632	94.6435	15.1799	71.4852		ENSG00000182899	RPL35A	2794.69	11.9773	19.4121	942.028
	ENSG00000011638	LDAF1	33.9822	34.0258	25.8946	31.3009		ENSG00000011638	LDAF1	27.6078	18.8821	20.4666	22.3189		ENSG00000012124	CD22	3.35982	3.7841	104.791	37.3116		ENSG00000197601	FAR1	9.24176	2786.19	9.17604	934.87
	ENSG00000012048	BRCA1	33.881	102.225	36.9584	57.6881		ENSG00000012048	BRCA1	18.6918	85.9489	91.9986	65.5465		ENSG00000012174	MBTPS2	12.4514	13.2315	21.9878	15.8902		ENSG00000174353	STAG3L3	2.5059	2770.76	21.2741	931.514
	ENSG00000012061	ERCC1	113.946	5.29777	32.9506	50.7313		ENSG00000012061	ERCC1	92.3681	2.71791	2.08679	32.3909		ENSG00000012211	PRICKLE3	16.5628	17.4222	34.2344	22.7398		ENSG00000115207	GTF3C2	47.3571	45.6306	2688.97	927.321
	ENSG00000012124	CD22	6.00782	1.46888	104.428	37.3015		ENSG00000012124	CD22	2.35171	14.215	14.0026	10.1898		ENSG00000012232	EXTL3	15.1686	12.435	8.73036	12.1113		ENSG00000221983	UBA52	2768.07	8.07059	2.58784	926.242
	ENSG00000012171	SEMA3B	1.03482	21.6776	5.93821	9.55021		ENSG00000012174	MBTPS2	12.5207	16.7374	15.3318	14.8633		ENSG00000012660	ELOVL5	119.054	112.532	108.66	113.415		ENSG00000240875	LINC00886	2.47482	2755.44	7.65425	921.855
	ENSG00000012174	MBTPS2	23.1725	14.7561	1.3179	13.0822		ENSG00000012211	PRICKLE3	18.6992	6.81907	11.1643	12.2275		ENSG00000012822	CALCOCO1	24.3709	19.8211	39.4915	27.8945		ENSG00000241343	RPL36A	2758.27	5.4944	1.67842	921.815
	ENSG00000012211	PRICKLE3	14.8466	11.1962	21.9733	16.0054		ENSG00000012232	EXTL3	12.3069	122.936	116.198	83.8137		ENSG00000012963	UBR7	34.3174	30.1151	62.5499	42.3274		ENSG00000198700	IPO9	17.3665	13.9787	2714.08	915.142
	ENSG00000012232	EXTL3	18.4095	138.8	13.2902	56.8333		ENSG00000012660	ELOVL5	109.833	23.2418	18.1787	50.4178		ENSG00000012983	MAP4K5	8.52137	10.0821	32.8391	17.1475		ENSG00000213741	RPS29	2668.52	7.75541	31.1837	902.486
	ENSG00000012660	ELOVL5	139.877	21.7946	19.1262	60.2661		ENSG00000012822	CALCOCO1	21.3311	31.4787	29.3859	27.3986		ENSG00000013275	PSMC4	105.978	100.955	40.6447	82.5262		ENSG00000220867	HSPE1P26	6.32884	2661.71	36.3591	901.464
	ENSG00000012822	CALCOCO1	24.5861	47.8646	141.598	71.3494		ENSG00000012963	UBR7	31.9639	9.72715	10.6139	17.435		ENSG00000013288	MAN2B2	43.8587	41.0877	11.0699	32.0054		ENSG00000110435	PDHX	22.7443	64.9137	2607.47	898.376
	ENSG00000012963	UBR7	44.116	15.5151	21.7171	27.1161		ENSG00000012983	MAP4K5	9.63035	88.1762	95.3684	64.3917		ENSG00000013306	SLC25A39	56.5769	61.9843	106.713	75.0913		ENSG00000107897	ACBD5	13.2973	23.0913	2639.62	892.003
	ENSG00000012983	MAP4K5	14.7738	154.26	44.5653	71.1995		ENSG00000013275	PSMC4	89.5751	41.3106	39.987	56.9576		ENSG00000013364	MVP	20.1612	24.6811	2.03057	15.6243		ENSG00000292334	SLC25A6	908.02	926.865	825.337	886.741
	ENSG00000013275	PSMC4	155.642	43.715	16.0205	71.7924		ENSG00000013288	MAN2B2	43.8467	49.3908	50.5326	47.9233		ENSG00000013374	NUB1	37.7665	36.3403	7.19425	27.1003		ENSG00000240230	COX19	12.2082	3.69576	2642.74	886.214
	ENSG00000013288	MAN2B2	40.5643	94.7412	150.974	95.4266		ENSG00000013306	SLC25A39	57.6059	26.9501	26.5228	37.0263		ENSG00000013375	PGM3	8.36899	9.37494	16.8571	11.5337		ENSG00000144524	COPS7B	47.1306	2554.38	40.6924	880.735
	ENSG00000013306	SLC25A39	97.2656	11.2296	41.2567	49.9173		ENSG00000013364	MVP	24.6281	38.1033	39.4301	34.0538		ENSG00000013392	RWDD2A	1.29752	100.183	13.2138	38.2315		ENSG00000167468	GPX4	601.127	2002.96	36.5992	880.228
	ENSG00000013364	MVP	11.1976	46.8162	98.6023	52.2054		ENSG00000013374	NUB1	38.9527	7.06996	9.35584	18.4595		ENSG00000013441	CLK1	97.1658	2.41813	43.5075	47.6971		ENSG00000174177	CTU2	18.4695	6.19004	2585.88	870.18
	ENSG00000013374	NUB1	44.2862	13.0287	12.9493	23.4214		ENSG00000013375	PGM3	8.3562	1.17344	1.07564	3.53509		ENSG00000013503	POLR3B	2.56496	9.21678	91.7807	34.5208		ENSG00000108107	RPL28	2585.14	14.7914	4.52731	868.152
	ENSG00000013375	PGM3	12.9811	1.5249	42.564	19.0233		ENSG00000013441	CLK1	110.148	100.949	119.081	110.059		ENSG00000013523	ANGEL1	10.5358	22.0672	226.411	86.338		ENSG00000114942	EEF1B2	2549.86	18.2697	14.607	860.911
	ENSG00000013392	RWDD2A	1.24368	51.8341	12.5783	21.8854		ENSG00000013503	POLR3B	1.84102	2.08719	2.16111	2.02977		ENSG00000013561	RNF14	18.375	15.1081	14.5002	15.9944		ENSG00000167395	ZNF646	12.9951	99.6047	2420.17	844.256
	ENSG00000013441	CLK1	41.5149	4.54227	1.13978	15.7323		ENSG00000013523	ANGEL1	8.88029	8.36921	9.15103	8.80018		ENSG00000013563	DNASE1L1	10.7386	35.4652	13.4826	19.8955		ENSG00000130052	STARD8	12.1441	89.7952	2427.64	843.194
	ENSG00000013503	POLR3B	4.14476	13.4334	49.2649	22.281		ENSG00000013561	RNF14	19.3888	16.646	16.555	17.5299		ENSG00000013573	DDX11	48.5574	93.2016	44.8385	62.1992		ENSG00000144645	OSBPL10	1.57845	1.99786	2501.74	835.106
	ENSG00000013523	ANGEL1	12.3512	24.6174	4.41653	13.7951		ENSG00000013563	DNASE1L1	13.416	11.3102	11.4162	12.0475		ENSG00000013583	HEBP1	97.8647	221.622	98.0048	139.164		ENSG00000114841	DNAH1	3.31309	32.2824	2460.98	832.191
	ENSG00000013561	RNF14	27.1067	13.1534	13.2824	17.8475		ENSG00000013573	DDX11	34.7252	37.7148	35.205	35.8817		ENSG00000013810	TACC3	220.253	10.2422	232.444	154.313		ENSG00000109107	ALDOC	9.17985	40.2311	2444.75	831.387
	ENSG00000013563	DNASE1L1	12.1072	47.1641	29.4654	29.5789		ENSG00000013583	HEBP1	91.6663	94.9039	94.2061	93.5921		ENSG00000014123	UFL1	12.9051	12.828	13.4596	13.0642		ENSG00000188559	RALGAPA2	12.2715	82.3936	2397.72	830.795
	ENSG00000013573	DDX11	52.4579	108.967	12.7677	58.0641		ENSG00000013810	TACC3	218.088	1.08237	215.886	145.019		ENSG00000014138	POLA2	11.8259	43.9281	2.1662	19.3067		ENSG00000172728	FUT10	9.43828	524.15	1957.63	830.407
	ENSG00000013583	HEBP1	106.93	229.766	50.1073	128.935		ENSG00000014123	UFL1	11.487	209.513	13.3688	78.1229		ENSG00000014164	ZC3H3	41.9542	95.4702	21.6583	53.0276		ENSG00000213648	SULT1A4	5.44943	2437.47	38.0987	827.007
	ENSG00000013810	TACC3	231.029	17.644	105.172	117.949		ENSG00000014138	POLA2	9.81325	12.1594	10.0929	10.6885		ENSG00000014216	CAPN1	99.1306	234.118	27.848	120.366		ENSG00000130255	RPL36	1985.78	430.045	11.6897	809.171
	ENSG00000014123	UFL1	16.4007	25.8417	228.882	90.3749		ENSG00000014164	ZC3H3	43.0495	11.3731	39.7411	31.3879		ENSG00000014641	MDH1	219.439	15.1197	12.849	82.4694		ENSG00000115268	RPS15	2346.05	7.47106	9.42958	787.65
	ENSG00000014138	POLA2	21.8805	42.5574	17.4353	27.2911		ENSG00000014216	CAPN1	85.8303	39.0724	84.6417	69.8481		ENSG00000014824	SLC30A9	14.5946	2.71421	27.4016	14.9035		ENSG00000109171	SLAIN2	20.2794	2327.7	10.9758	786.319
	ENSG00000014164	ZC3H3	47.0003	103.588	26.0628	58.8837		ENSG00000014641	MDH1	221.052	90.1474	223.098	178.099		ENSG00000014914	MTMR11	1.90767	22.7126	211.917	78.8459		ENSG00000070756	PABPC1	2228.98	54.3216	59.8956	781.065
	ENSG00000014216	CAPN1	103.089	1.08732	43.995	49.3905		ENSG00000014824	SLC30A9	13.7569	220.03	15.8998	83.2288		ENSG00000014919	COX15	26.7619	24.7513	35.2354	28.9162		ENSG00000188725	SMIM15	17.9958	2308.55	8.35986	778.303
	ENSG00000014641	MDH1	283.226	304.276	106.168	231.224		ENSG00000014914	MTMR11	2.30838	14.3366	2.15203	6.26569		ENSG00000015133	CCDC88C	29.5543	11.0271	33.8719	24.8178		ENSG00000125691	RPL23	2168.64	84.2827	81.3235	778.083
	ENSG00000014824	SLC30A9	25.0396	25.2014	1.10855	17.1165		ENSG00000014919	COX15	24.4762	1.40135	24.9896	16.9557		ENSG00000015153	YAF2	12.0662	29.9458	2.02028	14.6774		ENSG00000115165	CYTIP	4.49806	2302.98	6.34598	771.274
	ENSG00000014914	MTMR11	4.20199	5.03303	304.969	104.735		ENSG00000015133	CCDC88C	25.7506	24.5199	23.6189	24.6298		ENSG00000015171	ZMYND11	27.2618	192.826	18.0647	79.3841		ENSG00000174748	RPL15	2290.33	8.87073	11.8752	770.359
	ENSG00000014919	COX15	32.5959	32.8886	25.8769	30.4538		ENSG00000015153	YAF2	12.5784	23.3121	13.35	16.4135		ENSG00000015285	WAS	211.571	37.4346	3.12602	84.0438		ENSG00000109475	RPL34	2274.78	6.40376	12.6008	764.595
	ENSG00000015133	CCDC88C	29.0171	29.8829	4.52002	21.14		ENSG00000015171	ZMYND11	28.7462	13.6186	30.0861	24.1503		ENSG00000015475	BID	31.7063	68.7553	32.1693	44.2103		ENSG00000084090	STARD7	92.3229	1079.47	1105.59	759.129
	ENSG00000015153	YAF2	12.5371	12.3107	32.7252	19.191		ENSG00000015285	WAS	200.373	29.5938	205.62	145.196		ENSG00000015479	MATR3	82.9023	2.05104	54.3679	46.4404		ENSG00000221440	RNU6ATAC31P	8.31916	4.80936	2263.33	758.82
	ENSG00000015171	ZMYND11	38.6289	39.6093	29.4875	35.9086		ENSG00000015475	BID	31.8911	195.896	31.9492	86.5788		ENSG00000015520	NPC1L1	2.30824	17.6173	34.7262	18.2172		ENSG00000129993	CBFA2T3	19.1373	2184.73	36.9763	746.949
	ENSG00000015285	WAS	189.782	197.651	15.4517	134.295		ENSG00000015479	MATR3	86.7529	30.772	40.6544	52.7264		ENSG00000015532	XYLT2	17.2262	3.38763	61.392	27.3353		ENSG00000149781	FERMT3	153.931	4.64146	2061.25	739.939
	ENSG00000015475	BID	49.6749	52.1936	39.3445	47.071		ENSG00000015520	NPC1L1	1.59708	86.143	1.76943	29.8365		ENSG00000015568	RGPD5	3.56647	56.5221	11.2152	23.7679		ENSG00000125629	INSIG2	25.0632	10.8078	2179.77	738.546
	ENSG00000015479	MATR3	98.4433	108.734	185.29	130.823		ENSG00000015532	XYLT2	17.7602	2.00876	16.8802	12.2164		ENSG00000015676	NUDCD3	67.2653	58.5671	32.4141	52.7488		ENSG00000196092	PAX5	2.86165	1096.36	1091.26	730.161
	ENSG00000015532	XYLT2	14.5909	15.1597	51.8412	27.1973		ENSG00000015568	RGPD5	3.20413	17.7966	3.25166	8.08412		ENSG00000016864	GLT8D1	41.031	35.5523	18.929	31.8374		ENSG00000167526	RPL13	2159.48	25.3089	4.7833	729.859
	ENSG00000015568	RGPD5	4.7682	4.68808	105.775	38.4103		ENSG00000015676	NUDCD3	54.297	3.56039	48.6138	35.4904		ENSG00000017260	ATP2C1	32.1265	50.6603	9.86406	30.8836		ENSG00000145331	TRMT10A	3.64261	2159.74	13.1089	725.496
	ENSG00000015676	NUDCD3	38.4923	67.0659	15.8001	40.4528		ENSG00000016864	GLT8D1	42.8673	57.8763	42.2019	47.6485		ENSG00000017797	RALBP1	53.3428	8.1878	3.18534	21.572		ENSG00000149925	ALDOA	2024.1	64.6194	71.6551	720.124
	ENSG00000016864	GLT8D1	49.6389	53.0552	4.51879	35.7377		ENSG00000017260	ATP2C1	34.0836	38.5907	33.1488	35.2744		ENSG00000018189	RUFY3	8.96013	30.2459	203.409	80.8716		ENSG00000075415	SLC25A3	155.75	1984.95	18.7593	719.818
	ENSG00000017260	ATP2C1	42.7816	45.2283	64.3915	50.8005		ENSG00000017797	RALBP1	56.7743	33.6902	55.0127	48.4924		ENSG00000018510	AGPS	28.6722	17.6936	8.42196	18.2626		ENSG00000108733	PEX12	2.63019	2094.16	60.0464	718.945
	ENSG00000017797	RALBP1	65.2807	64.7132	49.3561	59.7833		ENSG00000018189	RUFY3	8.16993	57.2285	7.82932	24.4093		ENSG00000018610	STEEP1	16.9592	8.40185	9.28592	11.549		ENSG00000105373	NOP53	1746.05	349.694	59.2647	718.337
	ENSG00000018189	RUFY3	15.603	12.5228	45.07	24.3986		ENSG00000018510	AGPS	33.4696	8.61036	31.0103	24.3634		ENSG00000018699	TTC27	11.9548	1.36898	135.492	49.6053		ENSG00000183648	NDUFB1	60.4755	2.27801	2088.2	716.985
	ENSG00000018510	AGPS	52.3241	51.9677	65.2157	56.5025		ENSG00000018610	STEEP1	15.304	33.3875	16.9741	21.8885		ENSG00000019102	VSIG2	1.60645	1.78218	7.06372	3.48412		ENSG00000149577	SIDT2	2.93953	2103.57	36.0072	714.173
	ENSG00000018610	STEEP1	24.8156	24.0278	12.9191	20.5875		ENSG00000018699	TTC27	10.2761	17.5671	9.77219	12.5384		ENSG00000019144	PHLDB1	1.97261	4.69737	4.74916	3.80638		ENSG00000067208	EVI5	2.63943	1044.69	1076.71	708.014
	ENSG00000018699	TTC27	21.4061	23.7815	54.3769	33.1882		ENSG00000019102	VSIG2	1.58479	10.5903	1.59725	4.59078		ENSG00000019169	MARCO	4.16798	214.893	63.1261	94.0625		ENSG00000204264	PSMB8	145.857	598.682	1372.66	705.733
	ENSG00000019102	VSIG2	1.63287	1.87705	21.809	8.43963		ENSG00000019144	PHLDB1	2.75179	1.19389	1.68312	1.87627		ENSG00000019582	CD74	213.691	10.5364	18.0644	80.7641		ENSG00000174705	SH3PXD2B	9.30823	2052.24	45.2404	702.263
	ENSG00000019144	PHLDB1	3.95765	3.68527	20.7711	9.47135		ENSG00000019169	MARCO	5.24295	2.10321	3.19469	3.51361		ENSG00000019995	ZRANB1	10.1001	7.88194	109.068	42.3498		ENSG00000145391	SETD7	17.493	44.4381	2042.28	701.405
	ENSG00000019169	MARCO	4.34685	4.82205	2.00779	3.72556		ENSG00000019582	CD74	200.102	5.07441	218.948	141.375		ENSG00000020129	NCDN	7.91849	137.014	13.9247	52.9523		ENSG00000162076	FLYWCH2	50.0877	2030.47	21.0419	700.533
	ENSG00000019485	PRDM11	1.02938	1.1169	2.66099	1.60242		ENSG00000019995	ZRANB1	10.5357	201.528	9.49556	73.8533		ENSG00000020181	ADGRA2	55.3286	7.16884	37.437	33.3115		ENSG00000184009	ACTG1	2068.17	6.2742	2.17793	692.207
	ENSG00000019582	CD74	148.997	156.317	4.14593	103.153		ENSG00000020129	NCDN	8.22053	10.4345	6.05947	8.23816		ENSG00000020256	ZFP64	7.08356	4.59205	8.18258	6.6194		ENSG00000107949	BCCIP	40.6033	1986.06	47.5839	691.415
	ENSG00000019995	ZRANB1	12.1464	12.2948	156.367	60.2694		ENSG00000020181	ADGRA2	123.813	6.82547	123.697	84.7785		ENSG00000020426	MNAT1	4.03055	63.0311	8.58781	25.2165		ENSG00000183814	LIN9	5.30394	2026.61	17.7226	683.214
	ENSG00000020129	NCDN	14.9865	15.5894	11.4004	13.9921		ENSG00000020256	ZFP64	6.78594	115.555	6.86414	43.0683		ENSG00000020633	RUNX3	16.4577	17.9428	9.76558	14.722		ENSG00000172809	RPL38	1954.73	50.301	40.3488	681.795
	ENSG00000020181	ADGRA2	171.774	152.98	16.5834	113.779		ENSG00000020426	MNAT1	5.6258	7.26859	6.3568	6.41706		ENSG00000020922	MRE11	19.0638	107.622	97.9516	74.8792		ENSG00000108669	CYTH1	11.1063	501.15	1522.65	678.301
	ENSG00000020256	ZFP64	8.52595	8.91136	159.404	58.9473		ENSG00000020633	RUNX3	65.5595	7.15113	63.0018	45.2375		ENSG00000021355	SERPINB1	113.617	10.9677	14.8503	46.4785		ENSG00000149658	YTHDF1	46.5219	146.161	1838.67	677.118
	ENSG00000020426	MNAT1	10.4055	10.1901	8.61964	9.73839		ENSG00000020922	MRE11	18.6487	66.5253	17.9322	34.3687		ENSG00000021574	SPAST	15.068	30.0825	87.1503	44.1002		ENSG00000075624	ACTB	1973.8	15.8447	40.2748	676.639
	ENSG00000020633	RUNX3	69.1244	66.3393	9.63258	48.3654		ENSG00000021355	SERPINB1	99.3102	19.0344	100.389	72.9114		ENSG00000021762	OSBPL5	34.3227	9.69907	9.07628	17.6994		ENSG00000075413	MARK3	49.3979	3.1564	1973.64	675.397
	ENSG00000020922	MRE11	26.9016	28.175	67.262	40.7795		ENSG00000021574	SPAST	13.31	97.2015	13.6537	41.3884		ENSG00000021776	AQR	6.96727	8.64767	22.704	12.773		ENSG00000174456	C12orf76	22.653	9.12224	1990.96	674.244
	ENSG00000021355	SERPINB1	150.657	160.644	24.8416	112.048		ENSG00000021762	OSBPL5	29.7115	13.83	28.1373	23.8929		ENSG00000021826	CPS1	10.0905	9.56717	9.05468	9.57077		ENSG00000172775	PSME3IP1	68.2664	1915.61	9.81582	664.564
	ENSG00000021574	SPAST	19.5501	18.135	157.122	64.9355		ENSG00000021776	AQR	10.0305	30.2245	10.0764	16.7771		ENSG00000022267	FHL1	8.38879	88.2394	248.141	114.923		ENSG00000188846	RPL14	1975.64	2.34065	14.9083	664.298
	ENSG00000021762	OSBPL5	38.845	38.2251	18.9945	32.0216		ENSG00000021826	CPS1	8.91619	10.703	9.18023	9.5998		ENSG00000022277	RTF2	93.9366	13.2221	15.6389	40.9325		ENSG00000149806	FAU	1822.39	108.68	57.6668	662.912
	ENSG00000021776	AQR	14.0155	14.9796	36.5196	21.8382		ENSG00000022267	FHL1	7.32687	8.96288	7.7226	8.00412		ENSG00000022567	SLC45A4	13.6657	80.721	26.2196	40.2021		ENSG00000147403	RPL10	1940.91	18.4293	25.0156	661.451
	ENSG00000021826	CPS1	12.3264	12.2144	13.309	12.6166		ENSG00000022277	RTF2	95.4972	7.86506	94.524	65.9621		ENSG00000022840	RNF10	92.8502	11.9141	27.2528	44.0057		ENSG00000227063	RPL41P1	1957.6	3.97563	5.5335	655.704
	ENSG00000022267	FHL1	12.169	13.41	11.9402	12.5064		ENSG00000022567	SLC45A4	16.9383	90.4801	14.7929	40.7371		ENSG00000022976	ZNF839	16.6137	27.632	110.518	51.5878		ENSG00000226360	RPL10AP6	9.17881	1934.77	17.9497	653.968
	ENSG00000022277	RTF2	103.022	108.413	12.7943	74.7431		ENSG00000022840	RNF10	77.8301	14.917	75.3714	56.0395		ENSG00000023041	ZDHHC6	26.9444	10.0098	4.45226	13.8022		ENSG00000180773	SLC36A4	3.04945	6.30508	1938.05	649.134
	ENSG00000022567	SLC45A4	13.6242	14.9421	87.3971	38.6545		ENSG00000022976	ZNF839	11.0744	78.4733	11.867	33.8049		ENSG00000023171	GRAMD1B	11.4539	224.39	16.3531	84.0658		ENSG00000145592	RPL37	1873.4	24.7648	32.3916	643.517
	ENSG00000022840	RNF10	98.7196	98.3834	13.6298	70.2443		ENSG00000023041	ZDHHC6	23.7807	13.2451	27.5403	21.522		ENSG00000023191	RNH1	214.203	15.2455	10.2873	79.9118		ENSG00000147206	NXF3	39.1131	27.3063	1860.07	642.163
	ENSG00000022976	ZNF839	10.6083	12.7582	101.092	41.4861		ENSG00000023171	GRAMD1B	10.6389	24.7337	10.2928	15.2218		ENSG00000023228	NDUFS1	16.8434	29.4083	15.7644	20.672		ENSG00000074800	ENO1	1904.83	3.43109	15.4579	641.239
	ENSG00000023041	ZDHHC6	36.2965	47.8146	10.4765	31.5292		ENSG00000023191	RNH1	187.171	9.9923	187.72	128.295		ENSG00000023287	RB1CC1	25.8174	22.7092	131.292	59.9397		ENSG00000147121	KRBOX4	19.5178	1839.75	47.1515	635.474
	ENSG00000023171	GRAMD1B	13.5182	13.9948	46.0527	24.5219		ENSG00000023228	NDUFS1	15.5215	195.384	16.5933	75.8328		ENSG00000023318	ERP44	29.1624	113.946	4.43805	49.1823		ENSG00000122565	CBX3	233.368	942.618	726.5	634.162
	ENSG00000023191	RNH1	374.495	367.585	13.8748	251.985		ENSG00000023287	RB1CC1	29.717	16.6148	31.3893	25.9071		ENSG00000023330	ALAS1	120.455	3.99023	89.6196	71.3549		ENSG00000149547	EI24	87.5947	1810.02	3.65403	633.758
	ENSG00000023228	NDUFS1	26.7537	30.4609	370.932	142.715		ENSG00000023318	ERP44	29.6536	31.5083	29.2488	30.1369		ENSG00000023516	AKAP11	4.9014	19.0282	40.0184	21.316		ENSG00000065978	YBX1	981.032	892.554	10.2773	627.955
	ENSG00000023287	RB1CC1	40.7844	41.6336	26.9008	36.4396		ENSG00000023330	ALAS1	109.716	30.8891	113.612	84.7391		ENSG00000023572	GLRX2	13.0754	9.74188	10.7733	11.1969		ENSG00000196262	PPIA	1840.38	22.2159	20.4278	627.676
	ENSG00000023318	ERP44	28.6786	28.6725	42.308	33.2197		ENSG00000023516	AKAP11	4.67339	103.8	4.63735	37.7034		ENSG00000023608	SNAPC1	8.52313	14.7928	15.2096	12.8419		ENSG00000234523	NDUFB1P2	3.11835	1834.96	8.33359	615.471
	ENSG00000023330	ALAS1	122.618	130.695	28.8837	94.0656		ENSG00000023572	GLRX2	5.54751	4.66444	15.0114	8.40777		ENSG00000023697	DERA	19.8985	120.668	6.71724	49.0947		ENSG00000226352	PSPC1-AS2	1.91661	4.1116	1837.03	614.353
	ENSG00000023516	AKAP11	7.56651	8.31269	125.791	47.2234		ENSG00000023608	SNAPC1	10.7186	6.8985	9.94241	9.1865		ENSG00000023734	STRAP	127.906	4.36129	9.4274	47.2315		ENSG00000237166	LINC01792	2.13864	1825.15	4.10313	610.465
	ENSG00000023572	GLRX2	24.12	28.045	7.90299	20.0227		ENSG00000023697	DERA	14.5407	11.1703	14.7066	13.4725		ENSG00000023839	ABCC2	5.89668	82.5858	44.0492	44.1772		ENSG00000166326	TRIM44	17.6149	1802.22	10.3837	610.074
	ENSG00000023608	SNAPC1	13.7119	13.7342	25.2615	17.5692		ENSG00000023734	STRAP	123.905	17.0738	120.893	87.2904		ENSG00000023892	DEF6	73.6409	38.7018	32.865	48.4026		ENSG00000234741	GAS5	1817.7	1.85408	4.08518	607.881
	ENSG00000023697	DERA	30.9142	33.6683	14.7694	26.4506		ENSG00000023839	ABCC2	6.21908	125.25	5.48761	45.6522		ENSG00000023902	PLEKHO1	37.5152	11.473	7.08534	18.6912		ENSG00000123349	PFDN5	603.396	34.6615	1182.57	606.876
	ENSG00000023734	STRAP	185.018	176.673	30.7579	130.816		ENSG00000023892	DEF6	80.1478	6.27012	71.2913	52.5698		ENSG00000023909	GCLM	11.3153	15.4164	32.3164	19.6827		ENSG00000105270	CLIP3	8.36369	1703.18	99.6963	603.746
	ENSG00000023839	ABCC2	4.59251	5.27159	176.886	62.2499		ENSG00000023902	PLEKHO1	35.0391	75.4162	33.9393	48.1315		ENSG00000024048	UBR2	15.5377	6.378	6.25911	9.3916		ENSG00000196209	SIRPB2	35.0855	1717.84	38.5961	597.173
	ENSG00000023892	DEF6	85.3401	82.1996	4.24204	57.2606		ENSG00000023909	GCLM	11.9454	35.8282	12.5135	20.0957		ENSG00000024422	EHD2	7.19848	6.95029	11.7611	8.63664		ENSG00000166441	RPL27A	1751.7	33.2411	5.73542	596.891
	ENSG00000023902	PLEKHO1	45.5491	46.8522	84.9033	59.1015		ENSG00000024048	UBR2	16.2277	12.3183	15.7202	14.7554		ENSG00000024526	DEPDC1	10.2193	46.9606	4.66945	20.6164		ENSG00000196415	PRTN3	267.89	14.346	1504.44	595.56
	ENSG00000023909	GCLM	13.133	13.7811	47.2047	24.7063		ENSG00000024422	EHD2	6.85524	17.2315	8.24805	10.7783		ENSG00000024862	CCDC28A	50.0495	34.6991	42.8211	42.5233		ENSG00000196531	NACA	1742.09	29.1828	5.76602	592.345
	ENSG00000024048	UBR2	20.5792	19.6126	12.9187	17.7035		ENSG00000024526	DEPDC1	8.96546	6.33317	9.76393	8.35418		ENSG00000025039	RRAGD	36.7976	7.9116	17.4321	20.7138		ENSG00000233762	RPS15P4	17.1741	13.0904	1745.19	591.817
	ENSG00000024422	EHD2	10.9309	10.4639	21.4747	14.2899		ENSG00000024862	CCDC28A	44.5752	10.1295	44.6694	33.1247		ENSG00000025156	HSF2	9.32042	28.374	44.3644	27.353		ENSG00000105229	PIAS4	25.0259	83.7998	1631.23	580.02
	ENSG00000024526	DEPDC1	13.0933	14.4375	11.7703	13.1003		ENSG00000025039	RRAGD	32.6757	46.4731	16.6718	31.9402		ENSG00000025293	PHF20	32.057	6.08641	21.4457	19.863		ENSG00000196497	IPO4	20.4021	1597.78	5.93121	541.372
	ENSG00000024862	CCDC28A	41.7396	44.6862	13.9045	33.4434		ENSG00000025156	HSF2	8.34477	35.0382	8.64247	17.3418		ENSG00000025423	HSD17B6	4.23422	11.4	291.192	102.275		ENSG00000145604	SKP2	19.2733	24.0606	1568.74	537.356
	ENSG00000025039	RRAGD	36.6675	37.1932	42.2946	38.7185		ENSG00000025293	PHF20	33.88	8.60743	34.2801	25.5892		ENSG00000025434	NR1H3	11.9655	6.62729	1.51359	6.70213		ENSG00000145741	BTF3	1522.75	62.3103	19.1093	534.723
	ENSG00000025156	HSF2	10.5583	11.0034	37.1899	19.5838		ENSG00000025423	HSD17B6	5.83602	34.9914	5.29459	15.374		ENSG00000025708	TYMP	7.43259	45.714	98.2075	50.4513		ENSG00000108848	LUC7L3	1554.55	32.4033	2.70571	529.885
	ENSG00000025293	PHF20	35.8222	36.9191	9.62377	27.455		ENSG00000025434	NR1H3	9.98997	5.148	8.01371	7.71723		ENSG00000025770	NCAPH2	49.7207	16.6704	128.748	65.0463		ENSG00000167996	FTH1	1527.34	43.4191	14.3989	528.386
	ENSG00000025423	HSD17B6	4.25623	5.58491	34.7663	14.8692		ENSG00000025708	TYMP	6.17926	10.8071	5.37753	7.45461		ENSG00000025772	TOMM34	18.3446	45.4275	8.37802	24.05		ENSG00000279483	-	1552.11	22.6966	2.92818	525.912
	ENSG00000025434	NR1H3	12.2367	11.5624	5.29418	9.69777		ENSG00000025770	NCAPH2	38.8252	4.86072	39.0497	27.5785		ENSG00000025796	SEC63	46.9816	19.22	1.55515	22.5856		ENSG00000145414	NAF1	8.10737	1544.7	17.3498	523.387
	ENSG00000025708	TYMP	10.5876	7.51441	12.8007	10.3009		ENSG00000025772	TOMM34	15.5519	39.5396	16.6704	23.9206		ENSG00000025800	KPNA6	20.2093	316.322	10.678	115.736		ENSG00000167895	TMC8	61.1121	31.0227	1476.99	523.042
	ENSG00000025770	NCAPH2	78.0409	63.5373	6.90449	49.4942		ENSG00000025796	SEC63	50.6638	17.1109	48.5025	38.7591		ENSG00000026025	VIM	285.693	1.72461	6.70503	98.0409		ENSG00000207650	MIR570	5.02086	1481.65	81.9912	522.886
	ENSG00000025772	TOMM34	29.4986	32.8822	66.6692	43.0167		ENSG00000025800	KPNA6	20.189	52.0407	19.7099	30.6466		ENSG00000026103	FAS	1.45385	1.20276	39.8426	14.1664		ENSG00000233597	RPL19P6	3.76195	1537.14	2.69223	514.533
	ENSG00000025796	SEC63	60.7831	62.5374	32.2048	51.8418		ENSG00000026025	VIM	267.697	19.5271	173.752	153.659		ENSG00000026297	RNASET2	98.0079	111.085	7.41992	72.1708		ENSG00000207425	Y_RNA	20.123	65.8684	1446.6	510.863
	ENSG00000025800	KPNA6	15.7573	15.9158	58.7654	30.1462		ENSG00000026036	RTEL1-TNFRSF6B	1.12636	253.293	1.82761	85.4156		ENSG00000026508	CD44	125.102	118.749	2.84312	82.2313		ENSG00000232940	HCG25	2.86242	3.48079	1525.99	510.778
	ENSG00000026025	VIM	250.582	240.911	23.9649	171.819		ENSG00000026103	FAS	1.19295	1.39558	96.2889	32.9592		ENSG00000026652	AGPAT4	9.1825	6.68294	22.3949	12.7535		ENSG00000135404	CD63	655.925	38.2001	832.372	508.832
	ENSG00000026036	RTEL1-TNFRSF6B	3.32888	1.37413	240.341	81.6814		ENSG00000026297	RNASET2	97.4249	2.14	111.408	70.3244		ENSG00000026950	BTN3A1	12.4729	12.3745	65.3208	30.0561		ENSG00000034713	GABARAPL2	52.2175	1439.42	29.7477	507.127
	ENSG00000026103	FAS	2.10425	1.55439	1.54903	1.73589		ENSG00000026508	CD44	109.001	73.4392	8.08459	63.5084		ENSG00000027001	MIPEP	8.32282	7.50654	20.5513	12.1269		ENSG00000166710	B2M	1497.75	4.07974	18.476	506.769
	ENSG00000026297	RNASET2	128.623	73.295	1.54463	67.8208		ENSG00000026652	AGPAT4	8.37273	112.25	11.2485	43.9572		ENSG00000027697	IFNGR1	41.4376	36.7865	137.473	71.8991		ENSG00000080802	CNOT4	9.95327	1495.26	9.58568	504.934
	ENSG00000026508	CD44	175.194	168.043	112.096	151.778		ENSG00000026950	BTN3A1	10.5685	10.3303	6.4852	9.128		ENSG00000027847	B4GALT7	8.62461	10.1381	35.9412	18.2346		ENSG00000204387	SNHG32	1420.8	68.6115	16.5432	501.983
	ENSG00000026652	AGPAT4	8.25392	8.96117	167.778	61.6643		ENSG00000027001	MIPEP	6.10399	1.30706	38.8271	15.4127		ENSG00000027869	SH2D2A	7.42579	4.38525	34.793	15.5347		ENSG00000279631	-	1.77806	1493.61	3.84609	499.746
	ENSG00000026751	SLAMF7	6.15036	5.65358	9.40495	7.06963		ENSG00000027697	IFNGR1	38.3001	10.6632	7.26995	18.7444		ENSG00000028116	VRK2	24.2228	24.3314	7.93449	18.8296		ENSG00000196141	SPATS2L	10.3923	8.9891	1479.61	499.665
	ENSG00000026950	BTN3A1	10.7724	12.2076	6.26465	9.7482		ENSG00000027847	B4GALT7	7.49822	7.55251	3.82881	6.29318		ENSG00000028137	TNFRSF1B	61.619	62.2762	2.24684	42.0474		ENSG00000204304	PBX2	116.212	1363.08	1.84354	493.711
	ENSG00000027001	MIPEP	11.4663	11.6735	10.6217	11.2538		ENSG00000027869	SH2D2A	4.09728	39.7514	23.6278	22.4922		ENSG00000028203	VEZT	21.394	16.397	62.2511	33.3474		ENSG00000166508	MCM7	299.075	11.529	1152.79	487.799
	ENSG00000027697	IFNGR1	52.6595	58.1223	13.1241	41.302		ENSG00000028116	VRK2	24.2813	8.38142	60.4169	31.0266		ENSG00000028277	POU2F2	121.506	133.033	28.924	94.4877		ENSG00000279453	-	1.69044	2.45662	1454.37	486.171
	ENSG00000027847	B4GALT7	14.5779	13.5503	54.3669	27.4984		ENSG00000028137	TNFRSF1B	59.7268	1.38384	18.3032	26.4713		ENSG00000028310	BRD9	33.1131	32.4623	12.3286	25.968		ENSG00000034677	RNF19A	45.61	17.2019	1391.41	484.741
	ENSG00000027869	SH2D2A	9.83987	8.02736	15.0258	10.9643		ENSG00000028203	VEZT	16.3837	25.1774	123.834	55.1318		ENSG00000028528	SNX1	33.8291	31.7744	48.3369	37.9801		ENSG00000096384	HSP90AB1	1110.87	6.11366	329.862	482.283
	ENSG00000028116	VRK2	37.2223	37.7897	7.94344	27.6518		ENSG00000028277	POU2F2	134.091	59.203	30.2717	74.522		ENSG00000028839	TBPL1	7.34282	7.78972	33.4221	16.1849		ENSG00000210144	MT-TY	1413.36	22.896	9.90107	482.053
	ENSG00000028137	TNFRSF1B	55.5418	55.1335	41.2783	50.6512		ENSG00000028310	BRD9	29.7132	18.0369	27.7706	25.1736		ENSG00000029153	BMAL2	2.90455	3.32259	23.3902	9.87244		ENSG00000196683	TOMM7	1349.87	8.66551	81.8063	480.114
	ENSG00000028203	VEZT	29.0086	30.9092	55.7646	38.5608		ENSG00000028528	SNX1	29.6341	130.479	10.2405	56.7846		ENSG00000029363	BCLAF1	61.0504	66.4861	40.754	56.0968		ENSG00000207513	RNU1-3	3.76157	752.925	681.151	479.279
	ENSG00000028277	POU2F2	169.114	182.158	31.3826	127.552		ENSG00000028839	TBPL1	8.88967	30.5573	1.8616	13.7695		ENSG00000029364	SLC39A9	28.6973	26.3319	355.159	136.729		ENSG00000080824	HSP90AA1	1410.1	5.8273	14.4265	476.785
	ENSG00000028310	BRD9	46.9044	46.2639	169.632	87.6001		ENSG00000029153	BMAL2	2.2996	31.0324	66.9205	33.4175		ENSG00000029639	TFB1M	11.7712	10.7126	14.4605	12.3148		ENSG00000234745	HLA-B	1418.04	1.52994	5.99093	475.188
	ENSG00000028528	SNX1	59.1146	35.5251	45.37	46.6699		ENSG00000029363	BCLAF1	68.2307	10.3282	29.0226	35.8605		ENSG00000029725	RABEP1	50.1009	46.5861	2.2886	32.9919		ENSG00000125743	SNRPD2	1240.87	12.9599	154.314	469.38
	ENSG00000028839	TBPL1	15.7845	15.3218	41.8525	24.3196		ENSG00000029364	SLC39A9	26.7775	1.88292	10.3577	13.006		ENSG00000029993	HMGB3	34.4354	29.7492	24.2858	29.4901		ENSG00000233927	RPS28	1392.92	7.8304	1.75615	467.501
	ENSG00000029153	BMAL2	3.94501	5.9116	14.8497	8.23543		ENSG00000029639	TFB1M	10.5975	69.0612	53.3245	44.3277		ENSG00000030066	NUP160	26.3436	24.9417	164.861	72.0487		ENSG00000181163	NPM1	1367.58	23.5416	8.71022	466.61
	ENSG00000029363	BCLAF1	74.9754	73.813	4.66016	51.1495		ENSG00000029725	RABEP1	54.2381	28.0406	36.249	39.5093		ENSG00000030110	BAK1	41.4992	39.3972	51.4271	44.1078		ENSG00000104824	HNRNPL	302.686	64.6876	1017.47	461.615
	ENSG00000029364	SLC39A9	36.5684	24.4039	75.4187	45.4637		ENSG00000029993	HMGB3	32.9494	9.55294	23.4263	21.9762		ENSG00000030582	GRN	325.48	339.835	29.6716	231.662		ENSG00000108423	TUBD1	12.5559	1159.37	189.585	453.835
	ENSG00000029639	TFB1M	12.597	16.0233	24.4533	17.6912		ENSG00000030066	NUP160	22.9113	52.3742	32.2183	35.8346		ENSG00000031003	FAM13B	12.2694	11.13	29.9744	17.7913		ENSG00000166313	APBB1	1.81965	1.56076	1357.8	453.728
	ENSG00000029725	RABEP1	68.7314	65.7104	15.3931	49.9449		ENSG00000030110	BAK1	35.1357	32.9894	309.114	125.746		ENSG00000031081	ARHGAP31	1.74582	1.71248	37.0994	13.5192		ENSG00000125630	POLR1B	25.8568	1326.13	8.63579	453.54
	ENSG00000029993	HMGB3	50.0117	49.0787	67.112	55.4008		ENSG00000030582	GRN	338.082	24.8183	13.8996	125.6		ENSG00000031691	CENPQ	25.5302	24.8805	3.05753	17.8227		ENSG00000111229	ARPC3	381.932	943.755	32.5487	452.745
	ENSG00000030066	NUP160	41.2749	42.3422	48.576	44.0644		ENSG00000031003	FAM13B	13.4963	35.2166	1.68811	16.8003		ENSG00000031698	SARS1	161.985	160.13	4.47457	108.863		ENSG00000180964	TCEAL8	9.64454	1301.58	39.3343	450.185
	ENSG00000030110	BAK1	65.2179	64.9173	42.1025	57.4126		ENSG00000031081	ARHGAP31	1.69959	314.769	25.7868	114.085		ENSG00000031823	RANBP3	53.3876	51.3501	14.2774	39.6717		ENSG00000163918	RFC4	55.7689	577.23	717.156	450.051
	ENSG00000030582	GRN	241.133	235.341	61.8382	179.437		ENSG00000031691	CENPQ	23.4792	14.3701	140.554	59.4679		ENSG00000032219	ARID4A	31.605	28.24	20.5285	26.7912		ENSG00000233830	EIF4HP1	1.65443	29.0194	1308.86	446.512
	ENSG00000031003	FAM13B	24.5326	25.9096	237.289	95.9105		ENSG00000031698	SARS1	140.575	1.71875	46.7824	63.0255		ENSG00000032389	EIPR1	30.1697	25.8713	33.8404	29.9605		ENSG00000234589	RPL13AP24	7.28213	1300.67	14.6088	440.852
	ENSG00000031081	ARHGAP31	2.14831	2.34877	24.1009	9.53265		ENSG00000031823	RANBP3	48.0633	24.2579	30.9831	34.4348		ENSG00000032444	PNPLA6	33.1554	34.8605	9.85646	25.9575		ENSG00000168936	TMEM129	27.835	450.536	825.337	434.569
	ENSG00000031691	CENPQ	30.1403	31.1217	2.36524	21.2091		ENSG00000032219	ARID4A	32.8228	141.66	24.6711	66.3845		ENSG00000032742	IFT88	2.04586	2.25375	9.81741	4.70567		ENSG00000123179	EBPL	89.0469	1195.2	11.6892	431.979
	ENSG00000031698	SARS1	269.452	294.994	30.0278	198.158		ENSG00000032389	EIPR1	26.7036	43.8275	36.5121	35.6811		ENSG00000033011	ALG1	5.45022	4.84832	41.631	17.3098		ENSG00000204388	HSPA1B	431.215	9.36078	846.085	428.887
	ENSG00000031823	RANBP3	71.8866	68.722	277.667	139.425		ENSG00000032444	PNPLA6	35.7132	34.1445	4.35576	24.7378		ENSG00000033030	ZCCHC8	19.5586	21.0281	24.1604	21.5824		ENSG00000104529	EEF1D	1193.69	60.0277	19.2451	424.319
	ENSG00000032219	ARID4A	26.2678	25.0426	68.7954	40.0353		ENSG00000032742	IFT88	2.25795	21.6359	5.16602	9.68661		ENSG00000033050	ABCF2	15.3421	13.9255	11.7887	13.6854		ENSG00000034510	TMSB10	1231.47	17.7278	22.4032	423.869
	ENSG00000032389	EIPR1	45.8345	45.7338	23.921	38.4965		ENSG00000033011	ALG1	5.33216	33.9522	20.0709	19.7851		ENSG00000033100	CHPF2	39.299	40.9199	14.7925	31.6704		ENSG00000125656	CLPP	76.7593	31.1154	1154.38	420.753
	ENSG00000032444	PNPLA6	38.7769	39.1247	41.8491	39.9169		ENSG00000033030	ZCCHC8	16.8507	3.02143	15.6695	11.8472		ENSG00000033170	FUT8	6.12566	1.21021	39.2914	15.5424		ENSG00000189283	FHIT	14.6435	217.573	1014.82	415.68
	ENSG00000032742	IFT88	4.5619	4.51167	35.248	14.7738		ENSG00000033050	ABCF2	18.4998	5.85195	37.3349	20.5622		ENSG00000033178	UBA6	8.14857	6.27661	1220.96	411.795		ENSG00000196511	TPK1	2.66891	4.88781	1235.76	414.439
	ENSG00000033011	ALG1	9.64826	8.93374	5.61995	8.06732		ENSG00000033100	CHPF2	39.7335	18.9306	7.19537	21.9531		ENSG00000033327	GAB2	43.2886	8.82968	3.44794	18.5221		ENSG00000130985	UBA1	184.458	179.535	870.888	411.627
	ENSG00000033030	ZCCHC8	12.7244	15.1593	11.2033	13.029		ENSG00000033170	FUT8	7.71049	14.0968	8.95052	10.2526		ENSG00000033800	PIAS1	23.2115	40.451	41.1406	34.9344		ENSG00000185361	TNFAIP8L1	33.1133	9.01592	1189.55	410.56
	ENSG00000033050	ABCF2	36.3035	44.7984	14.3823	31.8281		ENSG00000033178	UBA6	8.86456	37.0181	14.2276	20.0368		ENSG00000033867	SLC4A7	9.05278	19.6716	13.6215	14.1153		ENSG00000196655	TRAPPC4	18.1836	1205.04	5.68303	409.637
	ENSG00000033100	CHPF2	44.9012	42.8721	41.3143	43.0292		ENSG00000033327	GAB2	44.3154	7.39424	23.7467	25.1521		ENSG00000034053	APBA2	15.9301	12.4299	66.3891	31.5831		ENSG00000005059	MCUB	4.00675	623.786	599.943	409.245
	ENSG00000033170	FUT8	8.3625	9.59548	44.503	20.8203		ENSG00000033800	PIAS1	25.5418	8.87137	11.4291	15.2807		ENSG00000034152	MAP2K3	41.448	18.3676	16.8097	25.5418		ENSG00000137309	HMGA1	1202.97	21.4196	3.02718	409.138
	ENSG00000033178	UBA6	13.6539	12.8466	8.33137	11.6106		ENSG00000033867	SLC4A7	10.1613	43.6225	18.6257	24.1365		ENSG00000034510	TMSB10	1211.56	42.0781	77.4072	443.682		ENSG00000135299	ANKRD6	1.96919	654.848	565.482	407.433
	ENSG00000033327	GAB2	19.6992	20.3351	13.5169	17.8504		ENSG00000034053	APBA2	18.9044	22.0589	37.0505	26.0046		ENSG00000034533	ASTE1	4.87526	1289.32	31.1329	441.775		ENSG00000137185	ZSCAN9	10.059	35.2996	1173.74	406.368
	ENSG00000033800	PIAS1	21.8179	21.0107	51.8306	31.5531		ENSG00000034152	MAP2K3	39.4429	11.0944	994.197	348.245		ENSG00000034677	RNF19A	34.2863	4.37278	18.2184	18.9592		ENSG00000166529	ZSCAN21	8.61234	1163.57	41.0077	404.398
	ENSG00000033867	SLC4A7	23.6954	24.4557	21.8922	23.3478		ENSG00000034510	TMSB10	1017.92	17.1934	4.69083	346.602		ENSG00000034693	PEX3	13.4025	34.8506	190.497	79.5833		ENSG00000123416	TUBA1B	1190.04	8.756	7.74842	402.183
	ENSG00000034053	APBA2	16.3851	15.7537	25.555	19.2313		ENSG00000034533	ASTE1	3.99541	38.4171	37.2666	26.5597		ENSG00000034713	GABARAPL2	75.4168	11.0762	42.6962	43.063		ENSG00000137133	HINT2	33.3242	1161.68	10.8831	401.961
	ENSG00000034152	MAP2K3	62.001	56.396	15.6569	44.6846		ENSG00000034677	RNF19A	38.0626	1029.16	12.7498	359.991		ENSG00000035115	SH3YL1	17.1301	68.8657	39.5547	41.8502		ENSG00000095739	BAMBI	8.95568	38.4448	1150.65	399.351
	ENSG00000034510	TMSB10	1111.5	1102.35	57.0056	756.953		ENSG00000034693	PEX3	10.944	4.73659	68.8638	28.1815		ENSG00000035141	FAM136A	72.0503	12.2562	47.1796	43.8287		ENSG00000067369	TP53BP1	16.815	536.104	636.151	396.357
	ENSG00000034533	ASTE1	8.89814	8.16607	1087.65	368.238		ENSG00000034713	GABARAPL2	68.6623	38.413	16.1385	41.0712		ENSG00000035403	VCL	34.3876	75.3381	25.441	45.0556		ENSG00000110848	CD69	8.1293	568.419	612.099	396.216
	ENSG00000034677	RNF19A	38.1358	32.5517	8.21942	26.3023		ENSG00000035115	SH3YL1	13.3206	12.3137	74.9467	33.527		ENSG00000035499	DEPDC1B	17.8922	29.7966	19.5935	22.4274		ENSG00000080709	KCNN2	6.77597	5.95604	1174.22	395.652
	ENSG00000034693	PEX3	20.4334	21.1786	37.3719	26.328		ENSG00000035141	FAM136A	73.333	72.4008	32.78	59.5046		ENSG00000035681	NSMAF	209.78	19.0604	4.3208	77.7205		ENSG00000185507	IRF7	2.84745	1153.6	13.9915	390.145
	ENSG00000034713	GABARAPL2	81.4401	82.522	19.5464	61.1695		ENSG00000035403	VCL	34.3223	20.085	16.39	23.5991		ENSG00000035687	ADSS2	36.0755	203.763	60.0508	99.9632		ENSG00000084207	GSTP1	1113.01	34.4039	18.7767	388.729
	ENSG00000035115	SH3YL1	24.2746	22.0275	81.2243	42.5088		ENSG00000035499	DEPDC1B	17.9348	74.0202	188.525	93.4934		ENSG00000035862	TIMP2	43.1393	37.4759	17.9365	32.8506		ENSG00000185624	P4HB	1129.82	18.2488	15.2179	387.762
	ENSG00000035141	FAM136A	104.366	104.599	25.9187	78.2946		ENSG00000035681	NSMAF	188.931	34.5841	41.034	88.1831		ENSG00000035928	RFC1	45.8537	41.3996	1.24073	29.498		ENSG00000111665	CDCA3	30.6258	31.9621	1100.44	387.676
	ENSG00000035403	VCL	38.5079	41.6452	104.112	61.4219		ENSG00000035687	ADSS2	40.0093	18.1986	43.8803	34.0294		ENSG00000036054	TBC1D23	25.9737	39.2258	31.7174	32.3056		ENSG00000242282	-	29.7831	3.65619	1127.6	387.014
	ENSG00000035499	DEPDC1B	31.9306	30.7675	38.4768	33.725		ENSG00000035862	TIMP2	44.288	196.076	47.4144	95.9261		ENSG00000036257	CUL3	19.5536	26.5566	58.0041	34.7048		ENSG00000095951	HIVEP1	2.61766	1149.3	5.61128	385.844
	ENSG00000035681	NSMAF	347.289	365.421	31.7961	248.169		ENSG00000035928	RFC1	46.9973	41.9565	28.7747	39.2428		ENSG00000036448	MYOM2	8.61618	19.4579	12.0663	13.3801		ENSG00000172197	MBOAT1	5.65949	1115.04	35.2639	385.321
	ENSG00000035687	ADSS2	77.8428	78.4488	351.653	169.315		ENSG00000036054	TBC1D23	26.8233	45.7263	25.4632	32.6709		ENSG00000036530	CYP46A1	51.6802	2.83342	11.4127	21.9755		ENSG00000104312	RIPK2	4.63618	20.9707	1103.24	376.283
	ENSG00000035862	TIMP2	36.7322	1.49903	79.296	39.1758		ENSG00000036257	CUL3	21.0102	48.7271	6.94932	25.5622		ENSG00000036549	ZZZ3	11.4819	52.5776	32.1155	32.0584		ENSG00000104853	CLPTM1	59.2351	1015.08	36.7479	370.354
	ENSG00000035928	RFC1	58.9894	35.1792	38.4876	44.2187		ENSG00000036448	MYOM2	5.89855	28.4552	49.7544	28.036		ENSG00000036672	USP2	1.76657	18.6406	7.27227	9.22649		ENSG00000196230	TUBB	1048.36	27.6439	32.2395	369.416
	ENSG00000036054	TBC1D23	33.1651	53.6107	52.6084	46.4614		ENSG00000036530	CYP46A1	52.4665	23.9544	17.7345	31.3851		ENSG00000037042	TUBG2	1.40062	32.318	1.36358	11.6941		ENSG00000108352	RAPGEFL1	1.65605	25.7565	1074.26	367.223
	ENSG00000036257	CUL3	28.7379	34.4522	31.8022	31.6641		ENSG00000036549	ZZZ3	17.1585	5.42394	1.5672	8.04987		ENSG00000037241	RPL26L1	40.345	56.1725	10.2134	35.577		ENSG00000111653	ING4	35.0037	1045.24	20.4445	366.898
	ENSG00000036448	MYOM2	4.27306	29.5152	28.9103	20.8995		ENSG00000036672	USP2	1.10754	51.0436	31.8728	28.008		ENSG00000037474	NSUN2	51.6969	12.153	28.7565	30.8688		ENSG00000108518	PFN1	1046.54	40.8156	9.32247	365.559
	ENSG00000036530	CYP46A1	65.3093	4.83299	5.66788	25.27		ENSG00000037042	TUBG2	1.38743	19.227	50.3735	23.6626		ENSG00000037637	FBXO42	11.3393	7.65903	28.2021	15.7335		ENSG00000172086	KRCC1	34.5732	6.67232	1054.79	365.345
	ENSG00000036549	ZZZ3	24.4975	62.2897	57.5765	48.1212		ENSG00000037241	RPL26L1	33.4222	1.09569	10.6666	15.0615		ENSG00000037749	MFAP3	11.0606	24.9138	32.9058	22.9601		ENSG00000100030	MAPK1	31.2306	55.3971	1005.49	364.04
	ENSG00000036672	USP2	2.63645	23.2122	25.5044	17.1177		ENSG00000037474	NSUN2	53.8473	1.24751	12.483	22.5259		ENSG00000037757	MRI1	28.146	7.77782	43.206	26.3766		ENSG00000170231	FABP6	1.81449	132.847	954.265	362.975
	ENSG00000037042	TUBG2	1.43099	2.7858	2.69114	2.30264		ENSG00000037637	FBXO42	10.6511	31.0997	26.6288	22.7932		ENSG00000037897	METTL1	7.37066	2.33834	25.855	11.8547		ENSG00000106153	CHCHD2	891.597	22.3728	164.928	359.632
	ENSG00000037241	RPL26L1	52.6991	1.35437	1.57449	18.5427		ENSG00000037749	MFAP3	12.2289	55.7939	5.69894	24.5739		ENSG00000037965	HOXC8	1.9559	8.91519	13.4548	8.10862		ENSG00000104998	IL27RA	28.2291	1015.22	33.0202	358.822
	ENSG00000037474	NSUN2	95.8064	52.277	57.3545	68.4793		ENSG00000037757	MRI1	27.7844	9.65442	1.92798	13.1223		ENSG00000038002	AGA	9.88019	27.8014	35.0415	24.241		ENSG00000111237	VPS29	55.6615	34.815	976.426	355.634
	ENSG00000037637	FBXO42	14.0522	91.3962	90.0984	65.1823		ENSG00000037897	METTL1	8.38051	12.6947	8.81775	9.96432		ENSG00000038210	PI4K2B	24.2192	29.195	5.6629	19.6924		ENSG00000043462	LCP2	87.3825	694.435	282.747	354.855
	ENSG00000037749	MFAP3	15.8849	13.6322	13.3683	14.2951		ENSG00000037965	HOXC8	2.14839	19.5918	25.7114	15.8172		ENSG00000038219	BOD1L1	30.2033	28.2418	37.5086	31.9846		ENSG00000196189	SEMA4A	4.81302	1028.64	28.563	354.004
	ENSG00000037757	MRI1	29.0089	17.2382	17.3059	21.1843		ENSG00000038002	AGA	8.30161	8.2	33.0747	16.5254		ENSG00000038274	MAT2B	33.6929	46.2513	75.5169	51.8203		ENSG00000067225	PKM	1014.79	21.8681	23.28	353.314
	ENSG00000037897	METTL1	14.6117	29.4696	20.6683	21.5832		ENSG00000038210	PI4K2B	26.5367	1.74468	33.9073	20.7296		ENSG00000038358	EDC4	45.1475	46.3461	1.42249	30.972		ENSG00000084652	TXLNA	29.7897	504.043	519.089	350.974
	ENSG00000037965	HOXC8	2.06601	18.3648	14.5569	11.6626		ENSG00000038219	BOD1L1	33.1503	7.71248	38.5645	26.4757		ENSG00000038382	TRIO	26.6519	16.4505	24.5475	22.55		ENSG00000248278	SUMO2P17	4.15709	1044.54	2.11931	350.272
	ENSG00000038002	AGA	15.6802	2.26451	1.83416	6.59296		ENSG00000038274	MAT2B	31.387	26.8325	28.3525	28.8573		ENSG00000038532	CLEC16A	15.9108	34.1617	43.2613	31.1113		ENSG00000243678	NME2	1027.5	10.5446	6.48089	348.174
	ENSG00000038210	PI4K2B	44.6676	15.4259	15.6361	25.2432		ENSG00000038358	EDC4	41.9208	37.1933	14.5423	31.2188		ENSG00000039123	MTREX	38.4281	5.63692	30.0109	24.692		ENSG00000111348	ARHGDIB	987.8	27.1635	29.3571	348.107
	ENSG00000038219	BOD1L1	29.6777	47.1001	44.1972	40.325		ENSG00000038382	TRIO	27.7711	35.7255	36.3312	33.2759		ENSG00000039319	ZFYVE16	4.33262	33.8723	4.96446	14.3898		ENSG00000129933	MAU2	58.0348	112.103	864.109	344.749
	ENSG00000038274	MAT2B	44.3038	31.3688	29.7481	35.1402		ENSG00000038532	CLEC16A	14.7766	40.8233	5.85852	20.4861		ENSG00000039523	RIPOR1	35.7748	64.4384	17.286	39.1664		ENSG00000105202	FBL	988.233	25.3204	20.2395	344.598
	ENSG00000038358	EDC4	59.5553	52.112	43.0997	51.589		ENSG00000039123	MTREX	34.6643	38.3533	33.549	35.5222		ENSG00000039650	PNKP	67.8506	25.489	14.5642	35.9679		ENSG00000207752	MIR199A1	1.89768	864.248	167.316	344.487
	ENSG00000038382	TRIO	40.5108	62.4541	61.2495	54.7381		ENSG00000039319	ZFYVE16	6.1134	15.2775	59.574	26.9883		ENSG00000040199	PHLPP2	2.36656	32.8699	20.0617	18.4327		ENSG00000169019	COMMD8	12.7686	926.865	93.2755	344.303
	ENSG00000038532	CLEC16A	21.6789	43.2599	44.9343	36.6243		ENSG00000039523	RIPOR1	34.5726	38.0471	2.1156	24.9118		ENSG00000040275	SPDL1	24.3191	27.7353	5.16012	19.0715		ENSG00000100038	TOP3B	22.9689	1000.14	9.70106	344.272
	ENSG00000039123	MTREX	62.0208	20.2536	19.8482	34.0409		ENSG00000039650	PNKP	59.9758	6.65371	26.1718	30.9338		ENSG00000040341	STAU2	49.9066	4.26038	138.601	64.2558		ENSG00000248527	MTATP6P1	1026.94	1.94451	2.20676	343.698
	ENSG00000039319	ZFYVE16	10.7041	62.8334	62.9274	45.4883		ENSG00000040199	PHLPP2	1.53145	35.8925	34.2052	23.8764		ENSG00000040487	SLC66A1	27.5549	17.0225	29.5152	24.6976		ENSG00000172236	TPSAB1	1020.6	2.34363	7.12144	343.356
	ENSG00000039523	RIPOR1	39.8509	11.4038	11.1844	20.813		ENSG00000040275	SPDL1	25.2857	57.8783	26.1316	36.4319		ENSG00000040531	CTNS	6.06074	18.7454	24.161	16.3224		ENSG00000196154	S100A4	978.228	7.13644	41.3449	342.236
	ENSG00000039650	PNKP	85.7295	37.2288	39.2936	54.084		ENSG00000040341	STAU2	37.0256	1.57812	5.11846	14.5741		ENSG00000040608	RTN4R	15.9381	19.895	32.5276	22.7869		ENSG00000204392	LSM2	138.712	849.959	36.8762	341.849
	ENSG00000040199	PHLPP2	3.02173	81.9171	82.4514	55.7967		ENSG00000040487	SLC66A1	26.2137	26.9777	13.645	22.2788		ENSG00000040633	PHF23	15.8496	6.33292	16.8504	13.011		ENSG00000116251	RPL22	842.248	20.4402	154.613	339.1
	ENSG00000040275	SPDL1	38.0824	3.09707	3.28948	14.823		ENSG00000040531	CTNS	5.614	40.361	15.9562	20.6438		ENSG00000040933	INPP4A	21.1	115.191	1.28026	45.857		ENSG00000246596	-	8.27365	2.04207	1004.13	338.15
	ENSG00000040341	STAU2	56.6289	43.217	40.0732	46.6397		ENSG00000040608	RTN4R	17.3884	25.6493	18.6353	20.5577		ENSG00000041353	RAB27B	5.83151	28.2346	4.23923	12.7684		ENSG00000186787	SPIN2B	8.02431	15.8471	983.929	335.934
	ENSG00000040487	SLC66A1	34.6418	54.3805	47.8509	45.6244		ENSG00000040633	PHF23	18.3872	6.21965	5.1746	9.92715		ENSG00000041357	PSMA4	116.335	25.5645	8.91653	50.2719		ENSG00000106031	HOXA13	23.692	965.446	16.2633	335.134
	ENSG00000040531	CTNS	10.9343	33.0172	36.056	26.6692		ENSG00000040933	INPP4A	19.7457	13.683	119.593	51.0073		ENSG00000041802	LSG1	30.5545	30.5081	11.8104	24.291		ENSG00000186918	ZNF395	62.6471	906.965	34.1748	334.596
	ENSG00000040608	RTN4R	18.0084	10.0246	9.1342	12.3891		ENSG00000041353	RAB27B	5.17677	15.2889	31.1763	17.214		ENSG00000041880	PARP3	28.462	24.9601	770.79	274.737		ENSG00000243199	RPL6P10	7.61292	986.016	2.5544	332.061
	ENSG00000040633	PHF23	29.5142	15.2597	15.9461	20.24		ENSG00000041357	PSMA4	106.03	18.0304	24.2365	49.4323		ENSG00000041988	THAP3	28.271	2.66249	279.779	103.571		ENSG00000066027	PPP2R5A	24.0781	29.1108	940.859	331.349
	ENSG00000040933	INPP4A	20.7121	28.3783	24.8737	24.6547		ENSG00000041802	LSG1	27.6114	5.574	30.9516	21.379		ENSG00000042088	TDP1	21.3287	4.39078	10.4562	12.0586		ENSG00000089220	PEBP1	209.215	738.563	45.8447	331.207
	ENSG00000041353	RAB27B	8.94646	22.7801	19.8569	17.1945		ENSG00000041880	PARP3	24.5043	117.489	21.5895	54.5277		ENSG00000042286	AIFM2	1.41771	7.52921	27.6861	12.211		ENSG00000104973	MED25	60.779	5.24425	927.23	331.084
	ENSG00000041357	PSMA4	180.876	9.4257	9.90751	66.7364		ENSG00000041988	THAP3	28.9682	29.8296	1.71989	20.1726		ENSG00000042317	SPATA7	3.26616	12.817	108.517	41.5332		ENSG00000122862	SRGN	869.758	97.7488	23.4322	330.313
	ENSG00000041802	LSG1	37.5228	219.809	229.751	162.361		ENSG00000042088	TDP1	28.347	27.3723	4.35801	20.0258		ENSG00000042429	MED17	8.83844	639.861	13.0833	220.594		ENSG00000135486	HNRNPA1	728.348	20.0638	239.098	329.17
	ENSG00000041880	PARP3	27.7668	38.2133	38.2051	34.7284		ENSG00000042286	AIFM2	1.45502	27.1916	8.96938	12.5387		ENSG00000042445	RETSAT	10.4713	274.848	21.8524	102.391		ENSG00000100097	LGALS1	946.207	28.1433	11.2785	328.543
	ENSG00000041982	TNC	1.14984	26.6139	28.6547	18.8061		ENSG00000042317	SPATA7	3.85541	23.9062	11.7373	13.1663		ENSG00000042493	CAPG	752.967	1.39093	40.2462	264.868		ENSG00000104356	POP1	3.76961	936.663	38.5064	326.313
	ENSG00000041988	THAP3	26.109	1.11411	1.49192	9.57167		ENSG00000042429	MED17	9.42207	1.53059	679.287	230.08		ENSG00000042753	AP2S1	286.838	10.1454	37.7082	111.564		ENSG00000187109	NAP1L1	960.16	10.1554	4.81328	325.043
	ENSG00000042088	TDP1	28.7973	25.6457	25.2411	26.5614		ENSG00000042445	RETSAT	11.0115	3.93471	263.807	92.9179		ENSG00000043093	DCUN1D1	9.85953	32.4236	14.984	19.089		ENSG00000063046	EIF4B	488.05	19.5687	466.209	324.609
	ENSG00000042286	AIFM2	1.31231	32.7588	29.2355	21.1022		ENSG00000042493	CAPG	684.205	9.08155	12.955	235.414		ENSG00000043143	JADE2	31.1745	104.039	187.348	107.52		ENSG00000204382	XAGE1B	589.491	373.004	7.31711	323.271
	ENSG00000042317	SPATA7	3.1663	2.48334	2.06219	2.57061		ENSG00000042753	AP2S1	270.636	12.1835	29.4741	104.098		ENSG00000043462	LCP2	111.351	7.43958	6.15333	41.6481		ENSG00000169100	SLC25A6	908.02	54.6116	6.62221	323.085
	ENSG00000042429	MED17	12.8695	4.20153	4.4715	7.18084		ENSG00000043093	DCUN1D1	12.3369	663.153	110.793	262.094		ENSG00000043514	TRIT1	11.3258	19.425	21.7835	17.5114		ENSG00000100129	EIF3L	801.794	146.557	20.5276	322.96
	ENSG00000042445	RETSAT	13.2614	12.5796	11.9989	12.6133		ENSG00000043143	JADE2	28.7135	257.62	11.8648	99.3996		ENSG00000044090	CUL7	20.3692	39.5207	15.6346	25.1748		ENSG00000111716	LDHB	964.429	2.31861	2.0413	322.929
	ENSG00000042493	CAPG	757.485	14.2746	14.3631	262.041		ENSG00000043462	LCP2	101.42	11.6912	19.7831	44.298		ENSG00000044115	CTNNA1	40.3592	38.3087	8.82646	29.1648		ENSG00000151893	CACUL1	9.83124	162.835	794.256	322.307
	ENSG00000042753	AP2S1	326.801	754.57	742.602	607.991		ENSG00000043514	TRIT1	10.6194	27.8697	36.668	25.0524		ENSG00000044446	PHKA2	45.8962	13.7859	43.8968	34.5263		ENSG00000170291	ELP5	20.5543	938.353	1.64572	320.184
	ENSG00000043093	DCUN1D1	18.3926	315.847	321.977	218.739		ENSG00000044090	CUL7	18.8355	101.752	32.7268	51.1049		ENSG00000044459	CNTLN	12.8866	178.484	59.5778	83.6494		ENSG00000197045	GMFB	8.33088	849.525	100.744	319.533
	ENSG00000043143	JADE2	33.4222	18.7328	18.1101	23.4217		ENSG00000044115	CTNNA1	38.2059	14.7648	14.9101	22.6269		ENSG00000044574	HSPA5	192.72	12.8094	6.60484	70.7115		ENSG00000104904	OAZ1	944.172	7.72347	4.8709	318.922
	ENSG00000043462	LCP2	113.93	40.0511	41.878	65.2863		ENSG00000044446	PHKA2	36.0095	22.1385	197.822	85.3234		ENSG00000046647	GEMIN8	10.894	18.9827	40.2364	23.371		ENSG00000116128	BCL9	5.2137	118.184	832.382	318.593
	ENSG00000043514	TRIT1	21.6333	113.506	113.23	82.7898		ENSG00000044459	CNTLN	15.2036	39.2046	12.7533	22.3871		ENSG00000046651	OFD1	23.0796	14.6322	10.3278	16.0132		ENSG00000122692	SMU1	12.0274	4.38391	937.341	317.917
	ENSG00000043591	ADRB1	1.92428	25.0459	16.842	14.604		ENSG00000044574	HSPA5	169.806	33.5264	24.137	75.8231		ENSG00000047056	WDR37	16.6264	8.31996	38.268	21.0714		ENSG00000130921	MTRFR	43.7282	904.106	4.35108	317.395
	ENSG00000044090	CUL7	25.7088	1.45889	1.62229	9.59665		ENSG00000046647	GEMIN8	13.3429	15.6522	15.3286	14.7746		ENSG00000047188	YTHDC2	9.46392	45.7272	11.8419	22.3444		ENSG00000178927	CYBC1	43.4307	2.44465	905.586	317.154
	ENSG00000044115	CTNNA1	58.8477	25.7001	25.0061	36.518		ENSG00000046651	OFD1	22.8204	176.509	10.1984	69.8425		ENSG00000047249	ATP6V1H	47.1225	69.0034	8.8175	41.6478		ENSG00000204525	HLA-C	897.882	32.9118	20.3721	317.055
	ENSG00000044446	PHKA2	44.4431	58.5588	58.0535	53.6851		ENSG00000047056	WDR37	16.6691	12.2106	44.8258	24.5685		ENSG00000047315	POLR2B	60.4644	9.33636	15.1424	28.3144		ENSG00000100084	HIRA	20.0203	14.1402	913.444	315.868
	ENSG00000044459	CNTLN	20.3213	52.0733	46.766	39.7202		ENSG00000047188	YTHDC2	9.79815	21.2298	68.654	33.2273		ENSG00000047346	ATOSA	7.52121	1.50301	23.8999	10.9747		ENSG00000197771	MCMBP	33.9358	10.1802	901.902	315.339
	ENSG00000044574	HSPA5	284.761	20.9513	20.3658	108.693		ENSG00000047249	ATP6V1H	47.0691	16.1367	11.7039	24.9699		ENSG00000047365	ARAP2	1.32664	38.3769	50.2565	29.9867		ENSG00000170315	UBB	933.875	3.54988	7.02149	314.815
	ENSG00000046647	GEMIN8	18.2292	262.545	243.624	174.799		ENSG00000047315	POLR2B	62.521	9.9815	1.19584	24.5661		ENSG00000047410	TPR	43.5295	7.32998	28.038	26.2992		ENSG00000203875	SNHG5	905.634	23.4607	13.0938	314.063
	ENSG00000046651	OFD1	24.5014	20.631	18.7744	21.3022		ENSG00000047346	ATOSA	10.3236	43.2448	44.2495	32.606		ENSG00000047578	KATNIP	9.1668	34.7268	23.4448	22.4461		ENSG00000100099	HPS4	53.2927	851.97	34.7757	313.346
	ENSG00000047056	WDR37	19.0392	26.225	26.1566	23.8069		ENSG00000047410	TPR	45.7537	65.7537	9.45596	40.3211		ENSG00000047579	DTNBP1	40.0767	10.1337	18.3656	22.8587		ENSG00000105997	HOXA3	2.99999	8.6084	927.814	313.141
	ENSG00000047188	YTHDC2	13.9744	18.8188	18.0719	16.955		ENSG00000047578	KATNIP	8.92395	8.88065	39.9287	19.2444		ENSG00000047597	XK	12.5522	8.02555	46.4025	22.3268		ENSG00000179218	CALR	857.289	42.6465	32.7402	310.892
	ENSG00000047249	ATP6V1H	47.5711	14.441	13.9867	25.3329		ENSG00000047579	DTNBP1	39.6753	1.20355	11.2722	17.3837		ENSG00000047621	C12orf4	8.02409	18.5105	13.9504	13.495		ENSG00000189362	NEMP2	5.84124	11.1286	915.129	310.7
	ENSG00000047315	POLR2B	72.2105	46.3807	50.0331	56.2081		ENSG00000047597	XK	11.0619	46.7812	9.57374	22.4723		ENSG00000047634	SCML1	12.8952	26.528	13.8051	17.7428		ENSG00000245910	SNHG6	897.437	7.30092	22.4056	309.048
	ENSG00000047346	ATOSA	10.5445	82.4051	74.2525	55.734		ENSG00000047621	C12orf4	11.0407	9.20472	15.5735	11.9396		ENSG00000047644	WWC3	25.4027	55.0495	4.39924	28.2838		ENSG00000116127	ALMS1	1.63095	870.346	29.9211	300.633
	ENSG00000047365	ARAP2	3.51523	9.74166	10.7468	8.00123		ENSG00000047634	SCML1	14.9524	36.0672	24.7566	25.2587		ENSG00000047849	MAP4	63.9788	26.6408	42.6037	44.4078		ENSG00000136143	SUCLA2	55.277	32.2497	811.519	299.682
	ENSG00000047410	TPR	57.0873	3.53273	3.56579	21.3953		ENSG00000047644	WWC3	26.1145	11.0555	58.066	31.7453		ENSG00000047932	GOPC	26.357	23.2969	40.0206	29.8915		ENSG00000105220	GPI	648.37	139.565	109.576	299.17
	ENSG00000047578	KATNIP	9.96836	57.1976	55.4161	40.8607		ENSG00000047849	MAP4	63.276	9.9773	30.555	34.6028		ENSG00000048028	USP28	22.1559	17.7005	11.4373	17.0979		ENSG00000136235	GPNMB	877.144	13.8918	3.33908	298.125
	ENSG00000047579	DTNBP1	44.8834	10.3258	9.97233	21.7272		ENSG00000047932	GOPC	29.3666	14.8707	23.8632	22.7001		ENSG00000048140	TSPAN17	17.453	41.1129	26.8815	28.4825		ENSG00000196152	ZNF79	3.70052	868.643	16.5887	296.311
	ENSG00000047597	XK	17.53	39.1392	45.0079	33.8923		ENSG00000048028	USP28	19.42	25.098	14.1491	19.5557		ENSG00000048162	NOP16	47.834	10.7896	49.5299	36.0512		ENSG00000210140	MT-TC	876.672	7.70038	4.08228	296.152
	ENSG00000047621	C12orf4	14.0719	16.5674	16.4506	15.6966		ENSG00000048140	TSPAN17	15.6072	60.7123	43.8196	40.0464		ENSG00000048392	RRM2B	15.9023	12.1938	36.0279	21.3747		ENSG00000210194	MT-TE	872.736	10.104	3.23827	295.359
	ENSG00000047634	SCML1	20.7841	14.5955	13.771	16.3835		ENSG00000048162	NOP16	39.1561	31.2462	13.5305	27.9776		ENSG00000048405	ZNF800	14.8617	4.82095	82.2683	33.9837		ENSG00000196205	EEF1A1P5	850.181	4.77928	29.6756	294.879
	ENSG00000047644	WWC3	29.4595	21.1281	22.1412	24.2429		ENSG00000048392	RRM2B	13.1198	19.41	16.4807	16.3368		ENSG00000048471	SNX29	6.69092	47.0942	4.91895	19.568		ENSG00000197847	SLC22A20P	4.23566	839.269	39.2854	294.263
	ENSG00000047849	MAP4	93.3027	30.1762	28.9939	50.8242		ENSG00000048405	ZNF800	15.0083	15.2441	5.06164	11.7714		ENSG00000048544	MRPS10	45.0709	27.7201	18.1922	30.3277		ENSG00000104894	CD37	522.757	64.1771	291.095	292.676
	ENSG00000047932	GOPC	39.9872	93.1679	98.2937	77.1496		ENSG00000048471	SNX29	4.56215	39.5962	40.5653	28.2412		ENSG00000048649	RSF1	30.444	10.9835	35.2083	25.5453		ENSG00000204379	XAGE1A	573.737	241.711	62.4095	292.619
	ENSG00000048028	USP28	24.0627	41.7039	41.7246	35.8304		ENSG00000048544	MRPS10	42.7745	11.6915	34.9735	29.8132		ENSG00000048707	VPS13D	9.92555	25.093	13.1127	16.0438		ENSG00000196961	AP2A1	84.7857	12.0447	778.46	291.763
	ENSG00000048140	TSPAN17	27.9716	26.0916	24.2069	26.0901		ENSG00000048649	RSF1	34.8953	15.1256	10.6294	20.2168		ENSG00000048740	CELF2	32.3354	50.2986	36.8257	39.8199		ENSG00000104976	SNAPC2	49.4308	221.03	603.616	291.359
	ENSG00000048162	NOP16	83.0142	20.85	25.823	43.2291		ENSG00000048707	VPS13D	11.5141	5.21993	24.7578	13.8306		ENSG00000048828	FAM120A	58.8988	35.429	75.7328	56.6869		ENSG00000136111	TBC1D4	3.73282	856.621	10.85	290.401
	ENSG00000048392	RRM2B	15.888	84.305	87.0851	62.4261		ENSG00000048740	CELF2	23.265	41.4333	52.4459	39.0481		ENSG00000048991	R3HDM1	40.8653	64.4351	50.4759	51.9254		ENSG00000203446	SUGCT-AS1	3.5729	818.568	43.9618	288.701
	ENSG00000048405	ZNF800	22.0553	14.7706	14.3784	17.0681		ENSG00000048828	FAM120A	48.9083	31.5179	42.3507	40.9257		ENSG00000049089	COL9A2	69.2954	6.60291	78.4907	51.463		ENSG00000179144	GIMAP7	1.84499	851.497	12.4635	288.602
	ENSG00000048471	SNX29	8.94163	20.4684	20.1508	16.5203		ENSG00000048991	R3HDM1	42.0148	11.7387	70.851	41.5348		ENSG00000049167	ERCC8	4.34174	20.1819	10.8896	11.8044		ENSG00000131143	COX4I1	818.47	13.3991	29.9651	287.278
	ENSG00000048544	MRPS10	88.6347	9.07103	8.36917	35.3583		ENSG00000049089	COL9A2	77.9177	24.3208	5.48062	35.9064		ENSG00000049239	H6PD	18.1258	33.3162	9.26552	20.2358		ENSG00000089327	FXYD5	704.103	142.383	8.06924	284.852
	ENSG00000048649	RSF1	27.8538	93.3018	94.4977	71.8844		ENSG00000049167	ERCC8	4.49695	48.2665	18.6833	23.8156		ENSG00000049245	VAMP3	31.8917	11.195	196.716	79.9341		ENSG00000125835	SNRPB	661.43	92.3912	97.7499	283.857
	ENSG00000048707	VPS13D	10.4818	34.6227	31.2121	25.4388		ENSG00000049239	H6PD	20.3129	44.1643	34.2627	32.9133		ENSG00000049246	PER3	11.7516	36.5041	1.98705	16.7476		ENSG00000232112	TMA7	633.945	14.6736	202.458	283.692
	ENSG00000048740	CELF2	45.3052	10.6069	10.4592	22.1237		ENSG00000049245	VAMP3	34.9206	71.6202	12.404	39.6483		ENSG00000049449	RCN1	31.2797	72.718	12.1605	38.7194		ENSG00000197956	S100A6	832.513	8.55315	9.84825	283.638
	ENSG00000048828	FAM120A	85.423	39.8733	39.5781	54.9581		ENSG00000049246	PER3	13.5039	6.61341	36.7457	18.9543		ENSG00000049541	RFC2	70.1223	60.9827	9.1232	46.7427		ENSG00000136100	VPS36	42.3033	42.0372	763.042	282.461
	ENSG00000048991	R3HDM1	53.3401	86.317	83.0422	74.2331		ENSG00000049449	RCN1	33.9807	14.5555	61.8821	36.8061		ENSG00000049618	ARID1B	64.8539	77.7112	10.7595	51.1082		ENSG00000238540	RNU7-93P	4.94441	2.69446	836.624	281.421
	ENSG00000049089	COL9A2	73.6214	57.0171	55.846	62.1615		ENSG00000049541	RFC2	61.3621	31.4126	44.0907	45.6218		ENSG00000049656	CLPTM1L	88.1106	11.1073	10.33	36.5159		ENSG00000106052	TAX1BP1	265.749	504.009	72.7976	280.852
	ENSG00000049167	ERCC8	9.16206	68.916	71.3631	49.8137		ENSG00000049618	ARID1B	44.3618	14.2207	72.4147	43.6657		ENSG00000049759	NEDD4L	12.5855	13.1423	66.3776	30.7018		ENSG00000160207	HSF2BP	1.76697	405.629	431.655	279.684
	ENSG00000049239	H6PD	24.3638	8.19405	9.23599	13.9313		ENSG00000049656	CLPTM1L	75.4856	35.2074	11.407	40.7		ENSG00000049769	PPP1R3F	11.3743	198.783	1.1461	70.4343		ENSG00000126107	HECTD3	25.651	99.9014	711.727	279.093
	ENSG00000049245	VAMP3	39.5695	24.1567	23.9891	29.2385		ENSG00000049759	NEDD4L	11.39	61.3742	11.564	28.1094		ENSG00000049860	HEXB	189.978	1.79312	28.5499	73.4404		ENSG00000117676	RPS6KA1	85.6159	648.639	95.9285	276.728
	ENSG00000049246	PER3	17.8541	42.2023	42.4863	34.1809		ENSG00000049769	PPP1R3F	12.8725	59.3272	206.15	92.7832		ENSG00000049883	PTCD2	1.52799	14.1496	18.621	11.4329		ENSG00000125753	VASP	135.617	17.5974	675.794	276.336
	ENSG00000049323	LTBP1	1.81342	18.1022	18.381	12.7656		ENSG00000049860	HEXB	199.061	64.1933	2.67674	88.6437		ENSG00000050130	JKAMP	13.6666	8.14961	28.4179	16.7447		ENSG00000089127	OAS1	6.26171	4.57798	818.134	276.325
	ENSG00000049449	RCN1	49.4207	1.47186	1.33083	17.4078		ENSG00000049883	PTCD2	1.82068	11.4506	11.7184	8.32992		ENSG00000050344	NFE2L3	6.67708	12.3815	371.784	130.281		ENSG00000173660	UQCRH	798.88	15.1988	13.609	275.896
	ENSG00000049541	RFC2	125.28	43.9807	45.7246	71.6619		ENSG00000050130	JKAMP	14.6076	12.7481	4.92532	10.7603		ENSG00000050393	MCUR1	8.60212	12.0975	25.4968	15.3988		ENSG00000197728	RPS26	814.075	3.38117	8.83295	275.43
	ENSG00000049618	ARID1B	73.1835	121.654	127.923	107.587		ENSG00000050344	NFE2L3	6.7779	201.361	11.2873	73.142		ENSG00000050405	LIMA1	11.9916	85.1522	13.2138	36.7858		ENSG00000129810	SGO1	34.5881	776.161	15.1466	275.299
	ENSG00000049656	CLPTM1L	102.213	78.3424	73.5761	84.7105		ENSG00000050393	MCUR1	11.4358	1.66281	10.5532	7.88394		ENSG00000050426	LETMD1	64.9027	1.20589	14.815	26.9745		ENSG00000290048	-	2.86525	805.432	14.4827	274.26
	ENSG00000049759	NEDD4L	11.5297	97.8121	100.014	69.7852		ENSG00000050405	LIMA1	10.8228	15.9143	64.218	30.3184		ENSG00000050438	SLC4A8	2.61922	27.0452	214.233	81.2992		ENSG00000173588	CEP83	17.2156	786.543	14.344	272.701
	ENSG00000049769	PPP1R3F	17.5257	10.6932	10.407	12.8753		ENSG00000050426	LETMD1	65.8069	9.78576	1.88051	25.8244		ENSG00000050748	MAPK9	31.4597	19.584	44.5064	31.8501		ENSG00000203402	-	2.03841	1.62513	814.055	272.573
	ENSG00000049860	HEXB	213.115	14.4184	15.6059	81.0464		ENSG00000050438	SLC4A8	1.52264	10.69	29.331	13.8479		ENSG00000051009	FHIP1B	21.6883	26.3695	21.3366	23.1315		ENSG00000136167	LCP1	766.171	20.2406	26.8438	271.085
	ENSG00000049883	PTCD2	5.08755	215.73	216.043	145.62		ENSG00000050748	MAPK9	28.746	10.5251	15.4384	18.2365		ENSG00000051108	HERPUD1	31.9305	369.089	14.7849	138.601		ENSG00000105048	TNNT1	248.156	546.839	11.6171	268.871
	ENSG00000050130	JKAMP	18.0426	3.93151	4.43028	8.80147		ENSG00000051009	FHIP1B	15.7557	65.317	25.917	35.6632		ENSG00000051128	HOMER3	323.07	20.45	28.4041	123.975		ENSG00000290242	-	798.079	1.51945	4.67123	268.09
	ENSG00000050344	NFE2L3	8.07048	18.4468	17.3838	14.6337		ENSG00000051108	HERPUD1	27.1571	2.10003	327.553	118.937		ENSG00000051180	RAD51	21.8648	11.3084	31.4515	21.5416		ENSG00000290102	-	3.86328	1.93885	793.432	266.411
	ENSG00000050393	MCUR1	19.238	7.06779	6.01501	10.7736		ENSG00000051128	HOMER3	311.067	29.6234	19.3412	120.01		ENSG00000051341	POLQ	14.2372	21.636	21.0875	18.9869		ENSG00000043143	JADE2	25.7838	16.8118	753.517	265.371
	ENSG00000050405	LIMA1	27.7188	18.8168	19.9708	22.1688		ENSG00000051180	RAD51	20.6378	15.1758	13.2463	16.3533		ENSG00000051382	PIK3CB	18.594	230.083	33.4125	94.0297		ENSG00000164045	CDC25A	26.8556	698.161	70.5938	265.204
	ENSG00000050426	LETMD1	62.0099	30.4793	28.5257	40.3383		ENSG00000051341	POLQ	12.6488	30.6258	20.0062	21.0936		ENSG00000051523	CYBA	187.794	45.9689	59.3189	97.6939		ENSG00000151718	WWC2	2.41303	779.3	9.42604	263.713
	ENSG00000050438	SLC4A8	1.5944	69.5372	65.0136	45.3817		ENSG00000051382	PIK3CB	18.7027	300.693	147.706	155.7		ENSG00000051596	THOC3	41.0988	19.2149	42.3268	34.2135		ENSG00000244270	RPL32P29	1.58969	2.02261	786.224	263.279
	ENSG00000050748	MAPK9	45.0481	1.68889	1.09214	15.9431		ENSG00000051523	CYBA	183.112	20.3116	30.1089	77.8443		ENSG00000051620	HEBP2	18.2335	13.6441	27.6694	19.849		ENSG00000130175	PRKCSH	777.927	7.66245	1.89883	262.496
	ENSG00000051009	FHIP1B	19.1583	42.2933	40.6809	34.0442		ENSG00000051596	THOC3	43.9302	12.5424	18.0534	24.842		ENSG00000051825	MPHOSPH9	14.861	21.9796	34.307	23.7159		ENSG00000197582	GPX1P1	75.2175	694.404	13.2578	260.96
	ENSG00000051108	HERPUD1	56.3055	19.9485	19.8842	32.046		ENSG00000051620	HEBP2	17.06	19.406	14.1399	16.8686		ENSG00000052723	SIKE1	23.3363	33.8559	3.31393	20.1687		ENSG00000152082	MZT2B	689.551	69.1923	21.0474	259.93
	ENSG00000051128	HOMER3	297.18	84.579	68.3562	150.039		ENSG00000051825	MPHOSPH9	13.9409	146.227	26.478	62.2153		ENSG00000052749	RRP12	32.5905	24.1643	70.1061	42.287		ENSG00000105583	WDR83OS	234.597	373.315	171.24	259.717
	ENSG00000051180	RAD51	34.2446	335.814	326.454	232.171		ENSG00000052723	SIKE1	23.0922	41.7167	30.933	31.914		ENSG00000052795	FNIP2	22.3894	33.6962	8.16731	21.4176		ENSG00000245532	NEAT1	6.15896	762.916	8.35374	259.143
	ENSG00000051341	POLQ	21.0395	35.7302	33.2954	30.0217		ENSG00000052749	RRP12	34.4471	17.5313	21.9703	24.6496		ENSG00000052802	MSMO1	23.9847	57.587	22.2695	34.6137		ENSG00000135387	CAPRIN1	98.5062	641.585	34.6264	258.239
	ENSG00000051382	PIK3CB	24.8622	21.8544	21.5382	22.7516		ENSG00000052795	FNIP2	23.3895	12.8134	27.8931	21.3653		ENSG00000052841	TTC17	61.0204	42.1726	20.7258	41.3063		ENSG00000198618	PPIAP22	202.602	445.859	126.137	258.199
	ENSG00000051523	CYBA	326.555	27.0392	21.5424	125.045		ENSG00000052802	MSMO1	26.4334	24.5208	61.6664	37.5402		ENSG00000053254	FOXN3	46.7648	25.9817	68.4378	47.0615		ENSG00000136059	VILL	17.7207	710.332	40.5938	256.216
	ENSG00000051596	THOC3	48.643	256.87	285.275	196.93		ENSG00000052841	TTC17	62.3886	36.0697	42.6811	47.0465		ENSG00000053371	AKR7A2	25.2736	33.4075	81.3587	46.6799		ENSG00000077152	UBE2T	73.973	559.524	134.264	255.92
	ENSG00000051620	HEBP2	31.2419	60.8853	58.1485	50.0919		ENSG00000053254	FOXN3	43.1278	24.9273	23.1824	30.4125		ENSG00000053372	MRTO4	32.1587	1.75189	71.9401	35.2835		ENSG00000163938	GNL3	120.373	613.299	31.7682	255.147
	ENSG00000051825	MPHOSPH9	20.2569	29.7962	31.3587	27.1373		ENSG00000053371	AKR7A2	20.4269	26.3096	27.9428	24.8931		ENSG00000053438	NNAT	2.83207	72.5602	3.78527	26.3925		ENSG00000111596	CNOT2	58.163	661.449	44.5478	254.72
	ENSG00000052723	SIKE1	33.9745	26.5106	24.2455	28.2435		ENSG00000053372	MRTO4	29.0305	61.8189	1.58129	30.8102		ENSG00000053501	USE1	62.1416	8.12873	26.2948	32.1884		ENSG00000225131	PSME2P2	1.5981	669.277	91.2407	254.039
	ENSG00000052749	RRP12	42.3279	32.768	34.6863	36.5941		ENSG00000053438	NNAT	1.41204	45.129	64.3215	36.9542		ENSG00000053770	AP5M1	13.0556	26.0695	21.532	20.219		ENSG00000126062	TMEM115	46.9355	709.182	5.58598	253.901
	ENSG00000052795	FNIP2	30.1656	45.7577	45.0777	40.3337		ENSG00000053501	USE1	68.588	19.5731	8.78625	32.3158		ENSG00000053900	ANAPC4	22.4299	19.3172	30.7783	24.1751		ENSG00000126267	COX6B1	701.33	3.31605	56.4317	253.693
	ENSG00000052802	MSMO1	17.9049	29.6328	28.9005	25.4794		ENSG00000053770	AP5M1	8.49835	29.2519	26.2565	21.3356		ENSG00000053918	KCNQ1	21.8243	69.0594	2.35054	31.0781		ENSG00000125734	GPR108	67.853	681.576	11.5824	253.67
	ENSG00000052841	TTC17	70.0215	17.2	17.996	35.0725		ENSG00000053900	ANAPC4	26.4102	1.40371	23.2841	17.0327		ENSG00000054116	TRAPPC3	60.109	71.2448	10.9498	47.4346		ENSG00000163374	YY1AP1	70.3005	392.686	295.895	252.961
	ENSG00000053254	FOXN3	58.1127	70.3961	70.6124	66.3737		ENSG00000053918	KCNQ1	19.9025	64.0549	63.6753	49.2109		ENSG00000054118	THRAP3	79.5851	49.8262	3.87411	44.4285		ENSG00000197579	TOPORS	7.83582	748.747	1.76344	252.782
	ENSG00000053371	AKR7A2	34.9647	61.0795	59.777	51.9404		ENSG00000054116	TRAPPC3	46.3379	8.05408	77.4962	43.9627		ENSG00000054148	PHPT1	57.095	3.25927	5.88607	22.0801		ENSG00000164733	CTSB	302.387	237.104	218.773	252.755
	ENSG00000053372	MRTO4	70.1258	30.8215	34.6745	45.2073		ENSG00000054118	THRAP3	75.0388	28.8267	49.9856	51.2837		ENSG00000054219	LY75	4.14867	24.5299	12.6953	13.7913		ENSG00000204256	BRD2	106.051	71.7226	580.437	252.737
	ENSG00000053438	NNAT	1.61799	70.2262	67.6854	46.5099		ENSG00000054148	PHPT1	50.995	20.88	3.87687	25.2506		ENSG00000054267	ARID4B	30.2292	21.9753	29.2226	27.1424		ENSG00000104408	EIF3E	625.243	29.5821	100.405	251.744
	ENSG00000053501	USE1	83.9439	78.0322	84.1561	82.0441		ENSG00000054219	LY75	4.30214	47.9073	34.2667	28.8254		ENSG00000054277	OPN3	24.1738	29.946	6.92875	20.3495		ENSG00000173511	VEGFB	4.90879	6.54545	742.975	251.476
	ENSG00000053770	AP5M1	13.1867	10.3771	8.75611	10.7733		ENSG00000054267	ARID4B	31.9578	79.6763	22.1849	44.6063		ENSG00000054282	SDCCAG8	34.4522	1.96538	78.9043	38.4406		ENSG00000178952	TUFM	300.73	136.397	317.153	251.427
	ENSG00000053900	ANAPC4	39.1487	39.4438	39.4224	39.3383		ENSG00000054277	OPN3	23.3054	40.3669	35.1783	32.9502		ENSG00000054392	HHAT	2.52369	11.9324	72.4094	28.9551		ENSG00000281383	-	79.5694	3.38259	671.153	251.368
	ENSG00000053918	KCNQ1	20.966	23.0931	20.1483	21.4024		ENSG00000054282	SDCCAG8	33.9934	3.08793	1.61467	12.8987		ENSG00000054523	KIF1B	12.9203	3.44104	46.1908	20.8507		ENSG00000147684	NDUFB9	613.611	6.14333	133.286	251.013
	ENSG00000054116	TRAPPC3	74.8856	79.8309	72.0033	75.5733		ENSG00000054392	HHAT	1.36011	33.2353	10.8435	15.1463		ENSG00000054598	FOXC1	2.96968	7.37995	5.9858	5.44514		ENSG00000077232	DNAJC10	15.9706	134.229	601.911	250.703
	ENSG00000054118	THRAP3	99.9023	100.824	99.3308	100.019		ENSG00000054523	KIF1B	10.466	21.1367	5.05631	12.2197		ENSG00000054611	TBC1D22A	5.726	13.2363	18.4891	12.4838		ENSG00000123106	CCDC91	32.3318	602.354	116.877	250.521
	ENSG00000054148	PHPT1	54.117	49.1551	52.9546	52.0756		ENSG00000054598	FOXC1	4.90662	35.062	5.50469	15.1578		ENSG00000054965	FAM168A	12.7821	26.5385	37.7613	25.694		ENSG00000197506	SLC28A3	7.01422	4.41227	736.989	249.472
	ENSG00000054219	LY75	5.37048	5.17392	5.37641	5.30694		ENSG00000054611	TBC1D22A	6.16028	1.9603	1.72144	3.28067		ENSG00000054967	RELT	26.1837	6.20598	44.5494	25.6464		ENSG00000117724	CENPF	52.6922	6.69657	685.279	248.223
	ENSG00000054267	ARID4B	25.6918	27.6877	28.1123	27.1639		ENSG00000054690	PLEKHH1	1.76612	11.396	14.7483	9.30347		ENSG00000054983	GALC	8.09819	66.4419	13.5781	29.3727		ENSG00000026025	VIM	338.055	38.3139	367.763	248.044
	ENSG00000054277	OPN3	26.5689	24.1719	29.0736	26.6048		ENSG00000054965	FAM168A	14.9828	4.50898	27.887	15.7929		ENSG00000055044	NOP58	68.397	77.0381	13.9278	53.121		ENSG00000240356	RPL23AP7	16.18	10.6657	714.633	247.16
	ENSG00000054282	SDCCAG8	30.9864	31.8515	32.249	31.6956		ENSG00000054967	RELT	25.8819	5.29965	8.00614	13.0626		ENSG00000055070	SZRD1	77.6179	47.7755	20.6092	48.6675		ENSG00000143190	POU2F1	6.81013	17.0058	716.805	246.874
	ENSG00000054392	HHAT	3.21035	3.11146	2.964	3.09527		ENSG00000054983	GALC	7.95358	14.825	78.0421	33.6069		ENSG00000055130	CUL1	45.6663	6.28067	67.0522	39.6664		ENSG00000164050	PLXNB1	5.27351	28.2081	707.094	246.859
	ENSG00000054523	KIF1B	18.2304	17.3894	18.2067	17.9422		ENSG00000055044	NOP58	75.5677	27.3193	63.9212	55.6027		ENSG00000055147	FAM114A2	9.16751	24.3243	59.1305	30.8741		ENSG00000240015	-	1.64415	726.248	12.3612	246.751
	ENSG00000054598	FOXC1	7.83325	7.10383	6.58239	7.17316		ENSG00000055070	SZRD1	64.7403	8.11847	45.8072	39.5553		ENSG00000055163	CYFIP2	19.3827	43.3387	6.63039	23.1173		ENSG00000197111	PCBP2	717.524	16.2974	3.78082	245.867
	ENSG00000054611	TBC1D22A	8.35044	6.62713	6.4322	7.13659		ENSG00000055130	CUL1	44.4548	75.7976	8.18434	42.8123		ENSG00000055208	TAB2	42.22	39.7568	33.2446	38.4071		ENSG00000143155	TIPRL	39.1656	634.74	58.2805	244.062
	ENSG00000054690	PLEKHH1	2.15822	2.62174	1.81671	2.19889		ENSG00000055147	FAM114A2	7.76125	64.5643	18.7623	30.3626		ENSG00000055211	GINM1	40.5485	15.5111	53.4939	36.5179		ENSG00000042493	CAPG	725.685	2.02608	2.48185	243.398
	ENSG00000054965	FAM168A	19.1819	20.0958	18.9214	19.3997		ENSG00000055163	CYFIP2	18.0923	46.3645	41.3159	35.2576		ENSG00000055332	EIF2AK2	15.4826	17.9128	3.35967	12.2517		ENSG00000164104	HMGB2	682.149	19.485	27.8975	243.177
	ENSG00000054967	RELT	26.4664	26.1318	24.2106	25.6029		ENSG00000055208	TAB2	38.9803	7.90128	40.4652	29.1156		ENSG00000055483	USP36	17.5148	20.0762	1.13171	12.9076		ENSG00000167363	FN3K	2.23385	623.747	103.429	243.137
	ENSG00000054983	GALC	10.8329	11.7991	12.5566	11.7295		ENSG00000055211	GINM1	45.7821	16.8491	16.6559	26.429		ENSG00000055609	KMT2C	23.2456	74.683	11.1278	36.3521		ENSG00000173812	EIF1	687.29	18.3062	22.8717	242.823
	ENSG00000055044	NOP58	118.606	122.683	124.654	121.981		ENSG00000055332	EIF2AK2	15.5543	39.7096	14.8387	23.3675		ENSG00000055917	PUM2	71.3191	57.6936	1.75605	43.5896		ENSG00000207401	Y_RNA	5.28373	10.6722	711.982	242.646
	ENSG00000055070	SZRD1	103.639	106.265	105.233	105.046		ENSG00000055483	USP36	15.3105	42.7357	19.8117	25.9526		ENSG00000055950	MRPL43	63.5759	3.58384	3.18938	23.4497		ENSG00000197746	PSAP	699.112	4.08031	23.6527	242.282
	ENSG00000055130	CUL1	62.7403	63.2947	65.0669	63.7006		ENSG00000055609	KMT2C	18.4845	14.8951	74.8753	36.085		ENSG00000055955	ITIH4	9.67319	33.322	5.81433	16.2698		ENSG00000005022	SLC25A5	574.556	78.4143	71.9066	241.626
	ENSG00000055147	FAM114A2	11.5084	12.0205	13.1428	12.2239		ENSG00000055917	PUM2	76.9936	15.5907	47.4642	46.6828		ENSG00000056050	HPF1	39.3247	48.7258	5.63127	31.2273		ENSG00000084092	NOA1	39.4244	345.391	339.547	241.454
	ENSG00000055163	CYFIP2	32.7597	34.1329	33.2809	33.3912		ENSG00000055950	MRPL43	57.1362	19.1417	3.87267	26.7169		ENSG00000056097	ZFR	47.3334	4.1243	235.216	95.5579		ENSG00000147140	NONO	675.805	2.66815	45.526	241.333
	ENSG00000055208	TAB2	54.043	51.882	54.4288	53.4513		ENSG00000055955	ITIH4	5.77748	59.5975	34.8288	33.4013		ENSG00000056277	ZNF280C	2.87092	7.61584	1.14424	3.877		ENSG00000165304	MELK	26.1921	363.628	332.012	240.611
	ENSG00000055211	GINM1	51.1914	54.6395	54.0072	53.2794		ENSG00000056050	HPF1	36.221	50.7082	48.0442	44.9911		ENSG00000056558	TRAF1	1.78994	2.27638	17.505	7.19043		ENSG00000147601	TERF1	17.515	102.139	602.151	240.602
	ENSG00000055332	EIF2AK2	20.0555	19.8214	23.5029	21.1266		ENSG00000056097	ZFR	46.6823	4.58875	3.07635	18.1158		ENSG00000056586	RC3H2	9.19765	5.27699	58.8626	24.4457		ENSG00000197535	MYO5A	5.87427	8.10388	707.63	240.536
	ENSG00000055483	USP36	17.829	21.0647	19.6063	19.5		ENSG00000056277	ZNF280C	3.60953	36.3259	1.5109	13.8154		ENSG00000056736	IL17RB	1.54505	8.08744	19.8842	9.83889		ENSG00000167291	TBC1D16	11.1668	9.29768	700.977	240.481
	ENSG00000055609	KMT2C	21.4354	21.1494	21.7987	21.4612		ENSG00000056558	TRAF1	1.24485	48.4288	10.6786	20.1174		ENSG00000056972	TRAF3IP2	7.41095	5.5092	11.7874	8.23586		ENSG00000168906	MAT2A	55.1767	655.968	6.89847	239.348
	ENSG00000055917	PUM2	98.9082	100.707	105.933	101.85		ENSG00000056586	RC3H2	10.2015	3.73455	2.24262	5.39288		ENSG00000057019	DCBLD2	6.45098	232.241	32.0243	90.2388		ENSG00000111602	TIMELESS	28.8187	8.35117	678.426	238.532
	ENSG00000055950	MRPL43	88.9033	87.5709	82.2941	86.2561		ENSG00000056736	IL17RB	2.06917	1.29781	4.71867	2.69521		ENSG00000057252	SOAT1	3.70673	1.4612	15.9992	7.05571		ENSG00000117984	CTSD	708.827	4.31195	1.57871	238.239
	ENSG00000055955	ITIH4	5.40823	5.57992	4.4487	5.14562		ENSG00000056972	TRAF3IP2	5.77382	9.9294	6.39539	7.3662		ENSG00000057608	GDI2	226.476	15.9436	118.586	120.335		ENSG00000104522	GFUS	80.8882	595.748	37.774	238.137
	ENSG00000056050	HPF1	53.9367	54.9472	51.4328	53.4389		ENSG00000057019	DCBLD2	7.17021	2.06892	5.11927	4.78613		ENSG00000057657	PRDM1	1.24212	56.2635	39.7083	32.4046		ENSG00000010256	UQCRC1	360.481	335.425	17.6571	237.854
	ENSG00000056097	ZFR	73.2419	76.8624	77.037	75.7138		ENSG00000057252	SOAT1	5.26663	5.43328	244.609	85.1031		ENSG00000057663	ATG5	14.9316	19.8761	6.45047	13.7527		ENSG00000076650	GPATCH1	31.8997	107.356	574.216	237.824
	ENSG00000056277	ZNF280C	8.17008	7.75348	8.35506	8.09288		ENSG00000057608	GDI2	230.996	7.34612	1.20856	79.8503		ENSG00000057757	PITHD1	59.0747	11.5665	14.15	28.2637		ENSG00000164032	H2AZ1	629.96	7.42702	75.836	237.741
	ENSG00000056558	TRAF1	2.50772	2.08335	2.50829	2.36645		ENSG00000057657	PRDM1	1.23409	5.03215	17.5115	7.92591		ENSG00000057935	MTA3	15.0649	29.3206	19.6653	21.3503		ENSG00000104219	ZDHHC2	10.1162	686.902	15.3806	237.466
	ENSG00000056586	RC3H2	16.1965	16.075	18.8903	17.054		ENSG00000057663	ATG5	17.2376	234.417	60.5502	104.068		ENSG00000058056	USP13	9.8958	14.9871	34.674	19.8523		ENSG00000143420	ENSA	208.044	411.365	91.9512	237.12
	ENSG00000056736	IL17RB	3.33728	1.52962	1.65284	2.17325		ENSG00000057757	PITHD1	63.1855	1.72658	19.1983	28.0368		ENSG00000058063	ATP11B	30.4104	111.215	76.7642	72.7965		ENSG00000104142	VPS18	24.24	9.28088	675.857	236.459
	ENSG00000056972	TRAF3IP2	5.4007	4.90655	6.11791	5.47506		ENSG00000057935	MTA3	18.9497	17.2982	11.1238	15.7906		ENSG00000058091	CDK14	16.5787	43.7627	15.3553	25.2322		ENSG00000231721	LINC-PINT	7.44286	698.835	1.92063	236.066
	ENSG00000057019	DCBLD2	7.47798	7.40013	7.5141	7.46407		ENSG00000058056	USP13	14.4122	64.1156	29.9551	36.161		ENSG00000058262	SEC61A1	118.013	5.17011	10.08	44.421		ENSG00000134333	LDHA	634.701	28.9023	44.459	236.021
	ENSG00000057252	SOAT1	9.33277	9.65011	9.19093	9.39127		ENSG00000058063	ATP11B	27.3972	20.7505	15.865	21.3376		ENSG00000058272	PPP1R12A	42.3541	11.3029	21.1695	24.9422		ENSG00000111676	ATN1	49.8782	353.42	303.567	235.621
	ENSG00000057608	GDI2	285.468	291.896	301.054	292.806		ENSG00000058091	CDK14	15.9766	12.1569	112.656	46.9298		ENSG00000058335	RASGRF1	6.17466	20.2095	13.2811	13.2218		ENSG00000102879	CORO1A	662.289	16.6899	21.9732	233.651
	ENSG00000057663	ATG5	24.0128	25.1572	23.6	24.2567		ENSG00000058262	SEC61A1	112.918	29.8753	50.5048	64.4328		ENSG00000058453	CROCC	12.4759	33.0112	26.746	24.0777		ENSG00000204257	HLA-DMA	6.9081	92.1131	601.128	233.383
	ENSG00000057757	PITHD1	81.4568	77.4677	78.1193	79.0146		ENSG00000058272	PPP1R12A	45.4976	15.328	7.14052	22.6554		ENSG00000058600	POLR3E	19.0829	50.5308	4.60532	24.7397		ENSG00000127603	MACF1	37.5515	6.39262	655.253	233.066
	ENSG00000057935	MTA3	26.8544	26.4489	27.0228	26.7754		ENSG00000058335	RASGRF1	5.79362	110.245	15.1575	43.7321		ENSG00000058668	ATP2B4	39.1757	10.9497	77.4856	42.537		ENSG00000051596	THOC3	33.1706	430.641	233.105	232.306
	ENSG00000058056	USP13	16.163	16.9024	15.2779	16.1144		ENSG00000058453	CROCC	16.4676	45.291	15.0999	25.6195		ENSG00000058673	ZC3H11A	61.4854	10.809	10.1932	27.4959		ENSG00000102606	ARHGEF7	74.9307	5.89822	614.494	231.774
	ENSG00000058063	ATP11B	44.3228	45.3812	45.3004	45.0014		ENSG00000058600	POLR3E	16.9441	4.68723	30.1972	17.2762		ENSG00000058729	RIOK2	13.7386	22.8479	70.9118	35.8327		ENSG00000111669	TPI1	682.045	1.68082	8.77254	230.833
	ENSG00000058091	CDK14	26.6472	26.098	26.31	26.3517		ENSG00000058668	ATP2B4	35.4932	15.0909	58.6968	36.427		ENSG00000058799	YIPF1	9.43316	14.9022	12.6654	12.3336		ENSG00000102760	RGCC	2.08797	667.102	22.5919	230.594
	ENSG00000058262	SEC61A1	158.418	160.858	162.392	160.556		ENSG00000058673	ZC3H11A	60.1802	18.2395	12.6227	30.3475		ENSG00000058804	NDC1	22.1114	33.169	15.2097	23.4967		ENSG00000143549	TPM3	298.447	339.234	53.5005	230.394
	ENSG00000058272	PPP1R12A	51.1415	52.6087	47.3549	50.3684		ENSG00000058729	RIOK2	13.3564	28.7497	9.78989	17.2986		ENSG00000058866	DGKG	12.647	6.87916	8.72535	9.41716		ENSG00000087274	ADD1	84.8372	21.6384	582.631	229.702
	ENSG00000058335	RASGRF1	8.94847	8.97773	9.37724	9.10115		ENSG00000058799	YIPF1	11.5659	65.9765	22.0899	33.2108		ENSG00000059122	FLYWCH1	30.4549	74.9416	8.33008	37.9089		ENSG00000135315	CEP162	2.29236	41.2835	638.51	227.362
	ENSG00000058453	CROCC	9.79512	9.71363	7.52743	9.01206		ENSG00000058804	NDC1	22.3366	12.0874	13.0928	15.8389		ENSG00000059145	UNKL	8.1376	9.86134	9.52681	9.17525		ENSG00000280927	CTBP1-AS	2.15971	5.78574	671.744	226.563
	ENSG00000058600	POLR3E	38.8943	37.5254	36.1516	37.5238		ENSG00000058866	DGKG	12.7918	12.929	29.6418	18.4542		ENSG00000059377	TBXAS1	74.8814	67.8575	79.3796	74.0395		ENSG00000122705	CLTA	632.791	35.8593	10.9365	226.529
	ENSG00000058668	ATP2B4	38.8888	28.2203	46.0783	37.7292		ENSG00000059122	FLYWCH1	32.4156	24.5049	5.56409	20.8282		ENSG00000059378	PARP12	11.4835	16.0265	1.88251	9.79752		ENSG00000280739	EIF1B-AS1	3.94677	2.84431	671.2	225.997
	ENSG00000058673	ZC3H11A	100.424	97.1146	91.1895	96.2428		ENSG00000059145	UNKL	7.37236	11.5861	75.7487	31.5691		ENSG00000059573	ALDH18A1	69.0473	13.5213	39.9066	40.8251		ENSG00000241468	ATP5MF	653.142	5.57586	17.1285	225.282
	ENSG00000058729	RIOK2	19.0688	17.9049	18.8758	18.6165		ENSG00000059377	TBXAS1	69.9441	28.8313	10.6693	36.4816		ENSG00000059588	TARBP1	14.2048	8.77743	52.3972	25.1265		ENSG00000122484	RPAP2	3.3929	669.359	1.73748	224.83
	ENSG00000058799	YIPF1	12.0826	12.9141	13.0275	12.6747		ENSG00000059378	PARP12	10.1505	5.88692	57.9224	24.6533		ENSG00000059691	GATB	13.6768	7.97552	77.1733	32.9419		ENSG00000163993	S100P	663.128	3.98397	6.44003	224.517
	ENSG00000058804	NDC1	32.1452	34.6732	33.454	33.4241		ENSG00000059573	ALDH18A1	58.4896	75.6424	13.0724	49.0681		ENSG00000059728	MXD1	8.85279	5.1632	43.682	19.2326		ENSG00000196924	FLNA	665.55	3.00388	4.64241	224.399
	ENSG00000058866	DGKG	18.1777	19.1189	17.5222	18.2729		ENSG00000059588	TARBP1	13.0202	10.0194	12.3481	11.7959		ENSG00000059758	CDK17	9.24248	46.4047	42.4703	32.7058		ENSG00000177410	ZFAS1	591.605	73.9739	6.20102	223.927
	ENSG00000059122	FLYWCH1	35.2968	31.1739	33.1195	33.1967		ENSG00000059691	GATB	13.0108	58.0516	8.57401	26.5455		ENSG00000059769	DNAJC25	6.69813	2.27023	4.99368	4.65401		ENSG00000163378	EOGT	8.99578	291.854	370.006	223.618
	ENSG00000059145	UNKL	6.85433	5.52552	5.99959	6.12648		ENSG00000059728	MXD1	9.55428	13.3701	9.14749	10.6906		ENSG00000059804	SLC2A3	68.7962	37.2056	2.10343	36.0351		ENSG00000240342	RPS2P5	655.164	7.95939	7.67912	223.601
	ENSG00000059377	TBXAS1	71.8619	69.8005	67.9026	69.855		ENSG00000059758	CDK17	7.40717	13.3608	7.58378	9.45058		ENSG00000059915	PSD	1.24109	45.5629	55.3217	34.0419		ENSG00000177119	ANO6	26.6263	27.7597	615.942	223.443
	ENSG00000059378	PARP12	15.5256	13.8833	14.1918	14.5335		ENSG00000059769	DNAJC25	6.85025	9.39749	79.4728	31.9068		ENSG00000060069	CTDP1	31.5562	76.3296	10.2355	39.3738		ENSG00000146833	TRIM4	39.3972	621.864	7.34537	222.869
	ENSG00000059573	ALDH18A1	97.9477	101.321	95.4812	98.25		ENSG00000059804	SLC2A3	63.5344	10.1089	32.071	35.2381		ENSG00000060237	WNK1	56.5755	48.6659	96.7311	67.3242		ENSG00000204261	PSMB8-AS1	16.8392	584.552	66.4979	222.63
	ENSG00000059588	TARBP1	13.9477	15.4123	16.3442	15.2347		ENSG00000059915	PSD	1.71612	7.97476	51.1651	20.2853		ENSG00000060339	CCAR1	81.1543	44.1936	60.6406	61.9962		ENSG00000143321	HDGF	599.177	29.137	39.0808	222.465
	ENSG00000059691	GATB	16.5286	17.5886	18.1288	17.4153		ENSG00000060069	CTDP1	33.5093	65.3172	93.6693	64.1653		ENSG00000060491	OGFR	41.0662	5.19212	13.568	19.9421		ENSG00000092445	TYRO3	24.8084	614.776	25.9699	221.851
	ENSG00000059728	MXD1	13.8004	12.331	13.6494	13.2603		ENSG00000060237	WNK1	61.3384	32.1259	44.8693	46.1112		ENSG00000060558	GNA15	43.0085	56.2325	24.8341	41.3583		ENSG00000104549	SQLE	51.1772	328.322	283.987	221.162
	ENSG00000059758	CDK17	10.8955	11.0168	12.1101	11.3408		ENSG00000060339	CCAR1	87.7996	56.0913	40.0306	61.3072		ENSG00000060642	PIGV	4.53501	9.11501	1.4543	5.03477		ENSG00000092148	HECTD1	50.1522	32.0279	579.755	220.645
	ENSG00000059769	DNAJC25	9.97724	10.2385	9.75043	9.98871		ENSG00000060491	OGFR	41.3062	105.559	3.99722	50.2873		ENSG00000060688	SNRNP40	61.5793	93.2701	2.56623	52.4719		ENSG00000150991	UBC	596.039	19.8191	44.6664	220.175
	ENSG00000059804	SLC2A3	36.0295	37.525	35.2176	36.2574		ENSG00000060558	GNA15	40.0355	48.9427	1.67627	30.2182		ENSG00000060749	QSER1	8.67915	54.6402	47.5258	36.9484		ENSG00000123066	MED13L	37.1109	50.7951	572.086	219.997
	ENSG00000059915	PSD	2.17912	2.13477	1.82743	2.04711		ENSG00000060642	PIGV	3.49211	40.3426	59.2563	34.3637		ENSG00000060762	MPC1	94.4736	13.4726	57.8345	55.2603		ENSG00000225031	EIF4BP7	1.96023	2.7281	654.078	219.589
	ENSG00000060069	CTDP1	40.0306	37.3737	36.85	38.0848		ENSG00000060656	PTPRU	1.67352	4.61245	8.69904	4.995		ENSG00000060971	ACAA1	43.6008	20.167	53.6263	39.1313		ENSG00000110955	ATP5F1B	577.032	52.8279	26.9546	218.938
	ENSG00000060237	WNK1	89.0738	85.6094	79.521	84.7347		ENSG00000060688	SNRNP40	53.1681	1.31493	85.54	46.6743		ENSG00000060982	BCAT1	15.2074	1.54979	7.11673	7.95796		ENSG00000177370	TIMM22	11.0449	630.386	15.242	218.891
	ENSG00000060339	CCAR1	63.9387	64.3397	65.4647	64.581		ENSG00000060749	QSER1	9.70353	57.8873	45.2277	37.6062		ENSG00000061273	HDAC7	27.6434	49.6813	1.35071	26.2251		ENSG00000135390	ATP5MC2	603.408	16.9099	36.0063	218.775
	ENSG00000060491	OGFR	65.2184	56.7267	53.8559	58.6003		ENSG00000060762	MPC1	81.1998	9.64488	13.9016	34.9154		ENSG00000061656	SPAG4	1.96219	48.335	52.0266	34.1079		ENSG00000084754	HADHA	478.688	117.736	59.2471	218.557
	ENSG00000060558	GNA15	46.5686	47.2766	45.6916	46.5123		ENSG00000060971	ACAA1	45.8888	81.7951	13.7452	47.143		ENSG00000061794	MRPS35	44.6202	43.1513	8.63264	32.1347		ENSG00000014641	MDH1	198.241	205.752	251.49	218.494
	ENSG00000060642	PIGV	7.08012	7.35312	6.51298	6.98207		ENSG00000060982	BCAT1	13.8017	45.4789	1.6876	20.3227		ENSG00000061936	SFSWAP	49.3104	6.00795	183.265	79.5278		ENSG00000150907	FOXO1	3.28073	26.8183	624.309	218.136
	ENSG00000060656	PTPRU	1.40182	1.9371	1.07206	1.47033		ENSG00000061273	HDAC7	24.582	13.4093	48.1061	28.6991		ENSG00000061938	TNK2	45.6426	51.1102	186.802	94.5184		ENSG00000225630	MTND2P28	627.515	12.7459	11.3131	217.191
	ENSG00000060688	SNRNP40	66.8435	78.8628	79.7469	75.1511		ENSG00000061656	SPAG4	1.36429	22.2782	49.1028	24.2484		ENSG00000061987	MON2	9.75028	9.77913	29.197	16.2421		ENSG00000144199	FAHD2B	23.5638	8.13648	618.303	216.668
	ENSG00000060749	QSER1	12.1067	12.8034	12.425	12.445		ENSG00000061794	MRPS35	46.957	1.75739	44.3222	31.0122		ENSG00000062194	GPBP1	53.5711	177.822	25.3904	85.5945		ENSG00000147465	STAR	30.3275	615.974	3.70052	216.667
	ENSG00000060762	MPC1	127.2	123.476	127.347	126.007		ENSG00000061936	SFSWAP	51.8496	46.6239	7.60068	35.3581		ENSG00000062282	DGAT2	9.44547	193.276	18.5169	73.746		ENSG00000168876	ANKRD49	33.0656	109.733	506.436	216.411
	ENSG00000060971	ACAA1	47.0272	43.9441	45.6012	45.5241		ENSG00000061938	TNK2	46.7685	46.4686	50.3727	47.8699		ENSG00000062485	CS	188.356	29.7692	8.69632	75.6071		ENSG00000147059	SPIN2A	1.69997	12.5733	634.627	216.3
	ENSG00000060982	BCAT1	29.0139	28.7629	28.6928	28.8232		ENSG00000061987	MON2	8.4355	44.8726	8.04951	20.4525		ENSG00000062582	MRPS24	177.332	24.706	85.5117	95.8498		ENSG00000163945	UVSSA	6.45564	2.2833	639.419	216.053
	ENSG00000061273	HDAC7	28.6623	25.4879	28.3161	27.4888		ENSG00000062194	GPBP1	57.1974	7.28593	174.763	79.7488		ENSG00000062598	ELMO2	34.2344	18.3747	481.897	178.169		ENSG00000092841	MYL6	570.305	34.5056	41.0301	215.28
	ENSG00000061337	LZTS1	2.86279	2.27093	2.65158	2.5951		ENSG00000062282	DGAT2	8.82724	50.4801	146.629	68.6455		ENSG00000062650	WAPL	25.2381	7.15253	2.26126	11.5506		ENSG00000104763	ASAH1	594.765	26.3812	24.5548	215.234
	ENSG00000061656	SPAG4	2.16816	1.99526	2.1299	2.09777		ENSG00000062485	CS	171.421	7.98873	30.8114	70.0736		ENSG00000062716	VMP1	19.9884	87.6519	8.63063	38.757		ENSG00000163848	ZNF148	11.1771	515.374	117.4	214.65
	ENSG00000061794	MRPS35	75.6582	79.2567	78.9388	77.9512		ENSG00000062582	MRPS24	156.073	171.249	25.7022	117.675		ENSG00000062725	APPBP2	7.1651	510.02	12.7793	176.655		ENSG00000166575	TMEM135	7.15149	19.3975	616.707	214.419
	ENSG00000061936	SFSWAP	54.6707	52.6106	53.2526	53.5113		ENSG00000062598	ELMO2	31.9095	147.633	19.0537	66.1988		ENSG00000062822	POLD1	75.7947	6.91051	5811.69	1964.8		ENSG00000163362	INAVA	10.5807	162.953	468.866	214.133
	ENSG00000061938	TNK2	42.2769	37.1227	38.5093	39.303		ENSG00000062650	WAPL	27.8974	29.3442	10.1993	22.4803		ENSG00000063046	EIF4B	514.413	14.5001	22.3796	183.764		ENSG00000164742	ADCY1	3.94753	313.282	319.738	212.323
	ENSG00000061987	MON2	10.1808	12.3573	11.7975	11.4452		ENSG00000062716	VMP1	20.6804	21.3526	71.1325	37.7219		ENSG00000063169	BICRA	5.51283	5851.33	58.4422	1971.76		ENSG00000204472	AIF1	374.871	254.877	6.64067	212.13
	ENSG00000062194	GPBP1	52.7486	53.4468	50.6551	52.2835		ENSG00000062725	APPBP2	8.91715	19.7435	489.784	172.815		ENSG00000063176	SPHK2	12.3875	18.1239	238.738	89.7499		ENSG00000146859	TMEM140	14.6909	72.0886	546.062	210.947
	ENSG00000062282	DGAT2	22.1919	19.5973	21.3152	21.0348		ENSG00000062822	POLD1	77.2401	9.15845	6.63968	31.0128		ENSG00000063177	RPL18	5618.94	40.6627	104.659	1921.42		ENSG00000086730	LAT2	406.495	1.69817	223.203	210.465
	ENSG00000062485	CS	214.027	225.448	200.96	213.478		ENSG00000063046	EIF4B	482.628	74.2415	11.9584	189.609		ENSG00000063180	CA11	19.0994	245.873	27.023	97.3318		ENSG00000163840	DTX3L	12.8479	93.028	523.609	209.828
	ENSG00000062582	MRPS24	252.163	250.956	256.146	253.088		ENSG00000063127	SLC6A16	1.38759	496.169	5558.72	2018.76		ENSG00000063241	ISOC2	55.6109	96.5789	21.333	57.8409		ENSG00000136830	NIBAN2	26.0422	584.378	18.9879	209.803
	ENSG00000062598	ELMO2	38.3368	41.7562	41.4764	40.5231		ENSG00000063169	BICRA	8.52734	6.63623	20.7526	11.9721		ENSG00000063244	U2AF2	243.898	26.5046	8.64542	93.0161		ENSG00000128272	ATF4	520.609	67.1349	41.0487	209.597
	ENSG00000062650	WAPL	33.9039	34.9557	34.4949	34.4515		ENSG00000063176	SPHK2	9.74245	11.2899	49.1206	23.3843		ENSG00000063245	EPN1	83.3388	20.4911	8.95181	37.5939		ENSG00000169564	PCBP1	522.736	47.593	56.7942	209.041
	ENSG00000062716	VMP1	26.9334	28.4709	26.1727	27.1923		ENSG00000063177	RPL18	5488.81	5455.36	222.419	3722.2		ENSG00000063322	MED29	27.0776	7.57783	3.5395	12.7317		ENSG00000067560	RHOA	565.966	55.7464	4.03317	208.582
	ENSG00000062725	APPBP2	9.82358	11.8808	9.88132	10.5286		ENSG00000063180	CA11	19.6526	21.3396	87.1641	42.7188		ENSG00000063438	AHRR	26.6023	9.19833	2.74558	12.8487		ENSG00000087460	GNAS	592.599	13.1395	19.4924	208.41
	ENSG00000062822	POLD1	114.69	106.631	109.396	110.239		ENSG00000063241	ISOC2	31.6506	49.041	24.2937	34.9951		ENSG00000063587	ZNF275	9.41423	4.09553	45.2746	19.5948		ENSG00000158710	TAGLN2	467.126	89.8921	66.7582	207.925
	ENSG00000063046	EIF4B	471.281	571.083	491.063	511.142		ENSG00000063244	U2AF2	234.562	230.979	21.4637	162.335		ENSG00000063601	MTMR1	8.75827	3.59529	72.7887	28.3808		ENSG00000115541	HSPE1	462.701	48.686	112.285	207.891
	ENSG00000063169	BICRA	9.02974	6.81202	8.11654	7.9861		ENSG00000063245	EPN1	104.87	100.839	8.69251	71.4672		ENSG00000063660	GPC1	3.53535	40.9468	24.4718	22.9846		ENSG00000114126	TFDP2	14.033	519.098	89.4767	207.536
	ENSG00000063176	SPHK2	15.171	15.1321	15.4964	15.2665		ENSG00000063322	MED29	23.6589	24.1625	9.0162	18.9459		ENSG00000063761	ADCK1	4.69834	72.4649	33.6808	36.948		ENSG00000109971	HSPA8	526.867	40.083	54.3603	207.103
	ENSG00000063177	RPL18	3894.93	3831.53	3875.05	3867.17		ENSG00000063438	AHRR	21.4565	21.6559	3.3078	15.4734		ENSG00000063854	HAGH	30.8778	27.0136	45.127	34.3394		ENSG00000105173	CCNE1	6.42735	254.491	359.315	206.744
	ENSG00000063180	CA11	24.8455	21.825	21.4913	22.7206		ENSG00000063587	ZNF275	8.3238	9.14387	3.06081	6.84283		ENSG00000063978	RNF4	73.1589	32.3213	1.35749	35.6126		ENSG00000172081	MOB3A	43.4963	3.32753	572.81	206.545
	ENSG00000063241	ISOC2	85.4541	63.2023	86.774	78.4768		ENSG00000063601	MTMR1	8.76682	9.68046	34.5573	17.6682		ENSG00000064012	CASP8	28.6639	39.9198	16.2342	28.2726		ENSG00000146729	NIPSNAP2	46.2507	509.848	63.4491	206.516
	ENSG00000063244	U2AF2	257.502	226.553	244.794	242.949		ENSG00000063660	GPC1	3.16142	2.68407	73.49	26.4452		ENSG00000064102	INTS13	33.6253	1.68291	49.5692	28.2925		ENSG00000155368	DBI	585.875	2.4504	30.7492	206.358
	ENSG00000063245	EPN1	144.503	140.755	133.181	139.479		ENSG00000063761	ADCK1	3.75428	4.23269	26.4353	11.4741		ENSG00000064115	TM7SF3	48.7111	15.697	2.59506	22.3344		ENSG00000135272	MDFIC	6.3835	608.375	4.25557	206.338
	ENSG00000063322	MED29	37.3139	38.0516	39.4425	38.2693		ENSG00000063854	HAGH	40.6655	27.8502	31.1648	33.2268		ENSG00000064201	TSPAN32	15.4121	48.8981	17.7572	27.3558		ENSG00000213639	PPP1CB	58.3287	27.9829	529.746	205.353
	ENSG00000063438	AHRR	15.3819	17.7347	17.5027	16.8731		ENSG00000063978	RNF4	69.4193	71.5294	46.8055	62.5847		ENSG00000064225	ST3GAL6	45.3827	2.86223	6.45963	18.2349		ENSG00000117632	STMN1	417.83	105.544	91.6492	205.008
	ENSG00000063587	ZNF275	15.5387	14.2319	14.9048	14.8918		ENSG00000064012	CASP8	24.5462	26.4764	1.44629	17.4896		ENSG00000064309	CDON	3.08619	18.1799	47.7113	22.9925		ENSG00000231312	MAP4K3-DT	2.40244	1.90419	610.15	204.819
	ENSG00000063601	MTMR1	14.5241	13.1829	13.2444	13.6504		ENSG00000064102	INTS13	33.1096	34.0276	13.8372	26.9914		ENSG00000064313	TAF2	19.1685	6.0063	17.7248	14.2998		ENSG00000172757	CFL1	569.241	1.80084	43.3389	204.794
	ENSG00000063660	GPC1	6.29577	4.95048	5.50334	5.5832		ENSG00000064115	TM7SF3	47.911	46.938	34.4159	43.0883		ENSG00000064393	HIPK2	6.61772	48.8959	61.2045	38.906		ENSG00000087302	RTRAF	28.6642	573.897	10.4688	204.343
	ENSG00000063761	ADCK1	5.14569	5.37997	3.98433	4.83666		ENSG00000064199	SPA17	1.33398	1.35469	2.54843	1.7457		ENSG00000064419	TNPO3	43.8157	22.7931	24.7527	30.4538		ENSG00000213316	LTC4S	4.63319	55.7509	551.144	203.843
	ENSG00000063854	HAGH	53.7204	41.8702	39.7671	45.1192		ENSG00000064201	TSPAN32	13.2094	14.544	19.9207	15.8914		ENSG00000064489	BORCS8-MEF2B	24.1481	78.7215	9.96113	37.6102		ENSG00000241106	HLA-DOB	3.06062	580.185	25.9687	203.071
	ENSG00000063978	RNF4	92.205	93.315	94.8806	93.4669		ENSG00000064225	ST3GAL6	42.2112	42.4485	8.32514	30.995		ENSG00000064490	RFXANK	65.52	30.3933	35.3862	43.7665		ENSG00000176022	B3GALT6	18.4816	93.4439	493.812	201.913
	ENSG00000064012	CASP8	35.5182	37.3935	36.0458	36.3192		ENSG00000064309	CDON	2.74165	3.212	45.0573	17.0036		ENSG00000064545	TMEM161A	25.2318	21.4928	85.2548	43.9931		ENSG00000130559	CAMSAP1	21.977	281.762	301.987	201.909
	ENSG00000064102	INTS13	49.1693	50.9311	57.172	52.4241		ENSG00000064313	TAF2	18.0916	19.763	15.2561	17.7036		ENSG00000064547	LPAR2	25.0714	40.0108	2.32524	22.4691		ENSG00000144381	HSPD1	549.586	2.95006	52.3722	201.636
	ENSG00000064115	TM7SF3	62.6295	65.9238	63.5687	64.0406		ENSG00000064393	HIPK2	6.71328	5.36625	61.3602	24.4799		ENSG00000064601	CTSA	42.0171	84.9651	2.27151	43.0846		ENSG00000213719	CLIC1	544.297	38.2721	21.3949	201.321
	ENSG00000064199	SPA17	1.58936	1.63683	1.6666	1.63093		ENSG00000064419	TNPO3	45.1374	34.9618	25.6097	35.2363		ENSG00000064607	SUGP2	86.4784	2.77585	115.5	68.2515		ENSG00000115053	NCL	560.279	37.0082	5.92685	201.071
	ENSG00000064201	TSPAN32	18.8196	20.922	19.4675	19.7364		ENSG00000064489	BORCS8-MEF2B	16.6037	15.9793	9.16993	13.9176		ENSG00000064651	SLC12A2	1.34767	101.428	22.322	41.6992		ENSG00000205670	SMIM11	13.1892	111.187	478.598	200.991
	ENSG00000064225	ST3GAL6	53.5453	63.7613	60.8652	59.3906		ENSG00000064490	RFXANK	55.3482	53.3751	32.2767	47		ENSG00000064666	CNN2	109.654	24.2558	14.354	49.4212		ENSG00000233010	RPEP4	2.81716	596.461	2.87899	200.719
	ENSG00000064309	CDON	3.49853	3.54021	3.85197	3.63024		ENSG00000064545	TMEM161A	23.8161	21.6391	77.9272	41.1274		ENSG00000064687	ABCA7	21.785	13.4081	35.6025	23.5985		ENSG00000104774	MAN2B1	329.376	188.254	83.4034	200.344
	ENSG00000064313	TAF2	29.4025	29.6956	29.2725	29.4569		ENSG00000064547	LPAR2	14.2655	20.8297	1.56105	12.2188		ENSG00000064703	DDX20	17.0079	35.399	9.40476	20.6039		ENSG00000104918	RETN	325.262	237.483	38.0915	200.279
	ENSG00000064393	HIPK2	9.46612	9.17801	9.38058	9.34157		ENSG00000064601	CTSA	32.9315	34.968	104.143	57.3475		ENSG00000064726	BTBD1	36.4484	8.10573	28.1317	24.2286		ENSG00000143772	ITPKB	9.36669	186.982	404.161	200.17
	ENSG00000064419	TNPO3	57.3194	62.1803	51.6986	57.0661		ENSG00000064607	SUGP2	91.0206	87.4813	23.1148	67.2056		ENSG00000064763	FAR2	8.71524	1.15386	17.8219	9.23033		ENSG00000109762	SNX25	3.07635	92.9395	504.082	200.032
	ENSG00000064489	BORCS8-MEF2B	22.3421	20.8827	17.9537	20.3928		ENSG00000064651	SLC12A2	1.47344	2.29546	15.9163	6.56173		ENSG00000064932	SBNO2	18.3865	25.6491	58.9722	34.3359		ENSG00000118503	TNFAIP3	8.2646	137.908	453.658	199.943
	ENSG00000064490	RFXANK	89.88	84.2179	92.6721	88.9233		ENSG00000064666	CNN2	100.087	97.2658	37.1727	78.1751		ENSG00000064933	PMS1	19.5583	28.0542	24.4294	24.014		ENSG00000002586	CD99	272.83	292.918	32.6951	199.481
	ENSG00000064545	TMEM161A	42.9664	39.6978	35.6276	39.4306		ENSG00000064687	ABCA7	23.7385	22.3486	7.81488	17.9673		ENSG00000064961	HMG20B	54.0261	55.9269	13.2362	41.0631		ENSG00000130734	ATG4D	29.3777	9.06822	559.145	199.197
	ENSG00000064547	LPAR2	18.6601	10.3093	15.0491	14.6728		ENSG00000064703	DDX20	10.8051	14.8003	20.3175	15.3077		ENSG00000064995	TAF11	23.1816	35.5117	95.4748	51.3894		ENSG00000166582	CENPV	22.325	508.24	64.9262	198.497
	ENSG00000064601	CTSA	43.0188	39.3557	39.656	40.6768		ENSG00000064726	BTBD1	36.5474	36.6752	19.4132	30.8786		ENSG00000064999	ANKS1A	11.6567	13.6128	47.048	24.1058		ENSG00000136732	GYPC	557.28	9.56838	26.2286	197.692
	ENSG00000064607	SUGP2	113.834	116.952	114.25	115.012		ENSG00000064763	FAR2	7.79008	7.60938	41.3476	18.9157		ENSG00000065000	AP3D1	90.706	82.3536	24.5313	65.8636		ENSG00000213261	EEF1B2P6	2.30047	582.785	6.45155	197.179
	ENSG00000064651	SLC12A2	3.66809	3.33365	3.64896	3.55023		ENSG00000064932	SBNO2	25.0623	19.0881	40.4041	28.1848		ENSG00000065029	ZNF76	60.6424	51.5204	7.50355	39.8888		ENSG00000104783	KCNN4	61.4357	30.8261	499.086	197.116
	ENSG00000064666	CNN2	133.207	138.574	130.967	134.249		ENSG00000064933	PMS1	19.9569	19.1813	11.3706	16.8363		ENSG00000065057	NTHL1	22.1867	25.1797	17.6418	21.6694		ENSG00000169919	GUSB	200.777	171.625	218.568	196.99
	ENSG00000064687	ABCA7	28.0912	29.2526	29.5105	28.9514		ENSG00000064961	HMG20B	45.1536	44.9669	84.3137	58.1447		ENSG00000065060	BLTP3A	8.03919	7.81478	161.896	59.25		ENSG00000173598	NUDT4	24.7004	51.6683	512.682	196.35
	ENSG00000064703	DDX20	23.5548	23.7635	17.4121	21.5768		ENSG00000064995	TAF11	30.6963	40.009	45.0456	38.5836		ENSG00000065135	GNAI3	18.3183	20.0716	62.0418	33.4772		ENSG00000104825	NFKBIB	37.9999	507.45	43.2812	196.244
	ENSG00000064726	BTBD1	48.326	45.9813	47.7815	47.363		ENSG00000064999	ANKS1A	12.5552	12.1752	18.9043	14.5449		ENSG00000065150	IPO5	167.23	159.374	4.81719	110.474		ENSG00000127922	SEM1	566.869	7.41437	14.093	196.126
	ENSG00000064763	FAR2	18.6019	19.146	17.3742	18.3741		ENSG00000065000	AP3D1	86.0858	84.5992	7.61248	59.4325		ENSG00000065154	OAT	68.552	68.083	11.4029	49.346		ENSG00000213442	RPL18AP3	575.524	1.96068	9.41596	195.634
	ENSG00000064932	SBNO2	30.4816	30.6412	29.9418	30.3549		ENSG00000065029	ZNF76	44.9627	46.9663	18.8054	36.9115		ENSG00000065183	WDR3	6.83227	7.01245	21.4668	11.7705		ENSG00000136938	ANP32B	556.583	16.9067	11.5599	195.017
	ENSG00000064933	PMS1	35.6275	36.727	35.048	35.8008		ENSG00000065057	NTHL1	18.2355	18.231	164.889	67.1185		ENSG00000065243	PKN2	10.6402	8.96342	18.0806	12.5614		ENSG00000111679	PTPN6	215.555	196.104	172.456	194.705
	ENSG00000064961	HMG20B	70.285	56.6754	65.1646	64.0417		ENSG00000065060	BLTP3A	7.53576	8.16327	63.1891	26.296		ENSG00000065268	WDR18	19.5784	18.6832	12.3061	16.8559		ENSG00000136504	KAT7	11.8341	544.689	26.5467	194.357
	ENSG00000064995	TAF11	60.3191	40.7826	56.4003	52.5006		ENSG00000065135	GNAI3	17.1804	18.8637	5.75547	13.9332		ENSG00000065308	TRAM2	20.752	17.8968	14.8804	17.8431		ENSG00000169371	SNUPN	15.9519	18.0225	547.568	193.847
	ENSG00000064999	ANKS1A	17.37	17.5313	19.2659	18.0557		ENSG00000065150	IPO5	165.993	165.748	12.1641	114.635		ENSG00000065320	NTN1	1.19226	1.18178	16.5753	6.31644		ENSG00000161800	RACGAP1	63.4882	50.2916	467.192	193.657
	ENSG00000065000	AP3D1	112.832	112.759	106.729	110.773		ENSG00000065154	OAT	59.2574	63.5988	14.2384	45.6982		ENSG00000065328	MCM10	10.261	10.7262	118.275	46.4209		ENSG00000114353	GNAI2	493.227	80.2604	6.49709	193.328
	ENSG00000065029	ZNF76	56.2214	56.3216	54.4999	55.681		ENSG00000065183	WDR3	6.00559	5.80348	18.2797	10.0296		ENSG00000065357	DGKA	14.9492	17.1184	6.38063	12.8161		ENSG00000108651	UTP6	27.9096	65.7894	485.202	192.967
	ENSG00000065057	NTHL1	29.6088	26.5537	26.0446	27.4024		ENSG00000065243	PKN2	11.4726	10.746	10.0276	10.7487		ENSG00000065413	ANKRD44	15.6483	15.5786	18.8409	16.6893		ENSG00000155252	PI4K2A	6.93881	27.4578	544.448	192.948
	ENSG00000065060	BLTP3A	15.0297	15.3902	14.8502	15.09		ENSG00000065268	WDR18	13.4518	14.518	17.6201	15.1966		ENSG00000065427	KARS1	131.235	126.323	19.9235	92.4941		ENSG00000119522	DENND1A	34.3433	478.34	63.6902	192.124
	ENSG00000065135	GNAI3	28.129	27.9051	27.637	27.8904		ENSG00000065308	TRAM2	19.0803	19.3141	14.5769	17.6571		ENSG00000065457	ADAT1	5.857	5.44278	319.046	110.115		ENSG00000009307	CSDE1	256.032	261.391	58.3352	191.919
	ENSG00000065150	IPO5	247.965	257.318	252.583	252.622		ENSG00000065328	MCM10	9.4432	10.3444	120.786	46.858		ENSG00000065485	PDIA5	23.7521	17.1957	18.7344	19.8941		ENSG00000076944	STXBP2	473.456	47.3304	52.2024	190.996
	ENSG00000065154	OAT	94.9114	99.0119	95.8763	96.5999		ENSG00000065357	DGKA	16.2248	15.2412	4.25412	11.9067		ENSG00000065491	TBC1D22B	20.8881	21.7306	146.055	62.8913		ENSG00000105281	SLC1A5	239.487	240.249	93.0448	190.927
	ENSG00000065183	WDR3	13.5655	14.3884	14.0387	13.9975		ENSG00000065413	ANKRD44	15.3033	16.0022	16.1305	15.812		ENSG00000065518	NDUFB4	296.862	334.498	10.7461	214.035		ENSG00000136875	PRPF4	27.663	4.87398	539.903	190.813
	ENSG00000065243	PKN2	14.6277	15.064	12.5948	14.0955		ENSG00000065427	KARS1	122.18	120.79	17.0896	86.6866		ENSG00000065526	SPEN	25.8803	20.5031	19.5671	21.9835		ENSG00000114861	FOXP1	28.0544	539.979	3.66696	190.567
	ENSG00000065268	WDR18	42.6163	37.9978	36.7286	39.1142		ENSG00000065457	ADAT1	5.6246	5.2955	318.011	109.644		ENSG00000065534	MYLK	1.21283	1.42459	38.7445	13.794		ENSG00000292348	CD99	272.83	292.918	5.21524	190.321
	ENSG00000065308	TRAM2	25.7363	26.9285	26.6596	26.4415		ENSG00000065485	PDIA5	15.0767	19.7476	18.7774	17.8672		ENSG00000065548	ZC3H15	135.295	151.651	4.3466	97.0977		ENSG00000104823	ECH1	303.067	48.4539	217.667	189.729
	ENSG00000065320	NTN1	1.10011	18.013	1.3919	6.835		ENSG00000065491	TBC1D22B	19.0732	18.7546	154.846	64.2245		ENSG00000065559	MAP2K4	9.938	11.8988	3.24836	8.36171		ENSG00000154518	ATP5MC3	465.832	76.3552	25.5702	189.252
	ENSG00000065328	MCM10	18.6726	27.7269	18.5673	21.6556		ENSG00000065518	NDUFB4	302.871	175.88	11.1872	163.313		ENSG00000065600	PACC1	19.4685	21.547	3.42186	14.8124		ENSG00000196741	LINC01560	5.11705	35.677	526.769	189.188
	ENSG00000065357	DGKA	25.8965	21.5443	26.322	24.5876		ENSG00000065526	SPEN	22.9627	23.2479	12.5669	19.5925		ENSG00000065613	SLK	36.7419	34.3876	5.71718	25.6155		ENSG00000140043	PTGR2	4.81771	152.798	409.326	188.981
	ENSG00000065413	ANKRD44	22.0247	200.177	20.2905	80.8307		ENSG00000065548	ZC3H15	155.224	1.11089	39.1129	65.1494		ENSG00000065615	CYB5R4	4.41159	4.74026	6.4334	5.19508		ENSG00000178982	EIF3K	528.951	29.4184	8.47175	188.947
	ENSG00000065427	KARS1	171.492	10.0726	169.553	117.039		ENSG00000065559	MAP2K4	10.5476	155.899	4.69312	57.0465		ENSG00000065621	GSTO2	2.08312	3.0402	86.7635	30.6289		ENSG00000169413	RNASE6	8.06869	537.465	21.0032	188.846
	ENSG00000065457	ADAT1	10.9872	22.5768	11.1442	14.9028		ENSG00000065600	PACC1	20.0223	12.1485	3.20351	11.7915		ENSG00000065665	SEC61A2	7.00984	7.44526	46.4514	20.3022		ENSG00000130714	POMT1	22.8172	528.264	15.4175	188.833
	ENSG00000065485	PDIA5	18.9692	23.6725	20.2499	20.9639		ENSG00000065613	SLK	37.611	19.2614	6.74447	21.2056		ENSG00000065675	PRKCQ	5.92126	5.23875	37.8851	16.3484		ENSG00000163041	H3-3A	351.816	92.1677	121.64	188.541
	ENSG00000065491	TBC1D22B	23.1429	342.444	24.5609	130.049		ENSG00000065615	CYB5R4	4.58354	43.1686	6.98139	18.2445		ENSG00000065802	ASB1	6.99376	7.75624	62.1294	25.6265		ENSG00000185838	GNB1L	13.2261	12.2168	540.012	188.485
	ENSG00000065518	NDUFB4	334.692	29.0189	339.27	234.327		ENSG00000065621	GSTO2	2.49092	4.73923	1.30484	2.845		ENSG00000065809	FAM107B	95.6857	84.3114	8.75509	62.9174		ENSG00000204371	EHMT2	108.642	242.806	213.752	188.4
	ENSG00000065526	SPEN	27.2496	1.17417	28.2179	18.8805		ENSG00000065665	SEC61A2	5.74675	2.16101	6.88941	4.93239		ENSG00000065882	TBC1D1	54.2435	54.4062	975.942	361.531		ENSG00000104903	LYL1	170.897	118.561	275.014	188.157
	ENSG00000065534	MYLK	1.68981	218.591	224.744	148.342		ENSG00000065675	PRKCQ	5.97096	5.83098	83.8762	31.8927		ENSG00000065883	CDK13	42.8275	51.0075	23.6506	39.1619		ENSG00000178741	COX5A	127.304	4.77252	431.896	187.991
	ENSG00000065548	ZC3H15	226.034	14.7936	14.428	85.0852		ENSG00000065802	ASB1	6.4791	7.01468	54.3537	22.6158		ENSG00000065911	MTHFD2	65.0517	61.6014	45.2508	57.3013		ENSG00000099194	SCD	352.562	33.3444	176.351	187.419
	ENSG00000065559	MAP2K4	15.7165	31.6697	32.2625	26.5496		ENSG00000065809	FAM107B	81.9589	1.16316	39.6506	40.9242		ENSG00000065970	FOXJ2	11.4742	10.1674	14.3442	11.9953		ENSG00000077380	DYNC1I2	533.14	25.4745	3.58408	187.4
	ENSG00000065600	PACC1	21.3757	54.1406	55.4048	43.6404		ENSG00000065882	TBC1D1	48.9253	7.41744	61.8201	39.3876		ENSG00000065978	YBX1	1014.2	883.016	27.4825	641.566		ENSG00000204305	AGER	24.4892	411.457	120.971	185.639
	ENSG00000065613	SLK	56.2604	5.68932	6.4121	22.7873		ENSG00000065883	CDK13	42.9074	85.2401	11.1152	46.4209		ENSG00000066027	PPP2R5A	26.1737	23.2465	29.823	26.4144		ENSG00000086589	RBM22	42.774	412.424	101.623	185.607
	ENSG00000065615	CYB5R4	5.82728	2.97796	2.41394	3.73973		ENSG00000065911	MTHFD2	62.0125	44.2239	912.291	339.509		ENSG00000066044	ELAVL1	44.9907	43.3303	25.0599	37.7937		ENSG00000240972	MIF	526.643	27.5235	2.04229	185.403
	ENSG00000065621	GSTO2	3.58548	7.96426	8.76601	6.77191		ENSG00000065970	FOXJ2	10.2839	39.4764	26.8577	25.5393		ENSG00000066084	DIP2B	14.2229	14.4588	1.39956	10.0271		ENSG00000130811	EIF3G	538.396	1.95279	14.7897	185.046
	ENSG00000065665	SEC61A2	6.76817	7.82876	8.29059	7.62917		ENSG00000065978	YBX1	886.099	60.3968	41.202	329.232		ENSG00000066117	SMARCD1	35.135	34.0121	3.74104	24.296		ENSG00000008517	IL32	201.415	293.326	59.4472	184.729
	ENSG00000065675	PRKCQ	7.70783	16.3277	1.2087	8.41473		ENSG00000066027	PPP2R5A	25.7652	11.403	14.896	17.3547		ENSG00000066135	KDM4A	33.5367	33.0542	10.0461	25.5456		ENSG00000106003	LFNG	5.39183	5.79191	542.169	184.451
	ENSG00000065717	TLE2	2.41312	190.031	15.1106	69.185		ENSG00000066044	ELAVL1	40.3553	887.008	24.3325	317.232		ENSG00000066136	NFYC	24.6734	29.1484	54.9735	36.2651		ENSG00000104714	ERICH1	93.271	262.616	197.346	184.411
	ENSG00000065802	ASB1	15.4514	72.6775	190.127	92.7518		ENSG00000066084	DIP2B	14.358	26.2224	30.8657	23.8154		ENSG00000066230	SLC9A3	4.4998	1.18387	206.409	70.6976		ENSG00000127955	GNAI1	1.54378	545.921	5.27906	184.248
	ENSG00000065809	FAM107B	188.302	48.629	71.0573	102.663		ENSG00000066117	SMARCD1	29.8395	40.8883	27.0081	32.5786		ENSG00000066279	ASPM	10.8882	2.31581	99.6363	37.6134		ENSG00000147155	EBP	217.457	89.5656	244.344	183.789
	ENSG00000065882	TBC1D1	72.841	179.42	50.1692	100.81		ENSG00000066135	KDM4A	29.2991	14.7125	2.35148	15.4544		ENSG00000066322	ELOVL1	50.1991	8.77205	17.7841	25.5851		ENSG00000114125	RNF7	31.5206	10.6329	509.138	183.764
	ENSG00000065883	CDK13	52.787	15.1926	181.813	83.2641		ENSG00000066136	NFYC	25.6042	29.5026	11.6643	22.257		ENSG00000066336	SPI1	157.999	52.1822	8.95156	73.0443		ENSG00000115816	CEBPZ	61.944	360.936	128.203	183.694
	ENSG00000065911	MTHFD2	179.509	994.137	14.1307	395.926		ENSG00000066185	ZMYND12	1.48205	29.6882	53.5144	28.2282		ENSG00000066379	POLR1H	111.648	201.731	23.8021	112.394		ENSG00000102007	PLP2	499.538	8.1647	43.3372	183.68
	ENSG00000065970	FOXJ2	14.854	32.6142	974.795	340.755		ENSG00000066230	SLC9A3	7.77714	24.5375	181.191	71.1684		ENSG00000066422	ZBTB11	15.8836	106.676	9.383	43.981		ENSG00000127527	EPS15L1	60.654	483.167	5.62809	183.15
	ENSG00000065978	YBX1	987.439	57.5761	34.72	359.912		ENSG00000066279	ASPM	11.2566	1.29422	91.703	34.7513		ENSG00000066427	ATXN3	10.2297	15.0752	3.77206	9.69233		ENSG00000123178	SPRYD7	15.1868	9.128	524.711	183.009
	ENSG00000066027	PPP2R5A	34.2049	21.0111	55.4289	36.8816		ENSG00000066322	ELOVL1	44.8605	8.38799	12.633	21.9605		ENSG00000066455	GOLGA5	24.7838	11.348	16.4667	17.5328		ENSG00000155090	KLF10	20.4799	521.154	7.0003	182.878
	ENSG00000066044	ELAVL1	55.1366	51.6415	19.8765	42.2182		ENSG00000066336	SPI1	180.129	11.6849	9.7918	67.2018		ENSG00000066557	LRRC40	10.4682	25.7847	20.138	18.797		ENSG00000130309	COLGALT1	133.921	2.52741	411.541	182.663
	ENSG00000066084	DIP2B	20.0433	48.8022	52.6919	40.5124		ENSG00000066379	POLR1H	90.3319	53.3776	24.1239	55.9445		ENSG00000066583	ISOC1	4.44089	12.3898	12.1383	9.65632		ENSG00000136603	SKIL	1.51757	42.9756	502.645	182.379
	ENSG00000066117	SMARCD1	51.5989	44.5779	45.9123	47.3631		ENSG00000066422	ZBTB11	16.7335	177.332	10.7692	68.2782		ENSG00000066651	TRMT11	13.1026	3.28259	7.81704	8.06742		ENSG00000172232	AZU1	510.392	7.83235	28.5785	182.268
	ENSG00000066135	KDM4A	48.9212	1.28221	41.6839	30.6291		ENSG00000066427	ATXN3	11.6256	91.0347	3.78403	35.4814		ENSG00000066654	THUMPD1	21.9391	17.8354	23.6986	21.1577		ENSG00000114904	NEK4	14.1391	2.01002	528.987	181.712
	ENSG00000066136	NFYC	41.1421	6.26626	8.62703	18.6785		ENSG00000066455	GOLGA5	26.2439	18.5432	16.963	20.5833		ENSG00000066697	MSANTD3	12.4767	21.5132	3.96612	12.652		ENSG00000173715	C11orf80	4.16471	508.125	31.1673	181.152
	ENSG00000066185	ZMYND12	1.66825	12.3354	13.365	9.12289		ENSG00000066557	LRRC40	9.46212	12.1789	22.8742	14.8384		ENSG00000066739	ATG2B	7.04429	11.2926	20.2841	12.8737		ENSG00000147065	MSN	519.27	18.919	2.53839	180.242
	ENSG00000066230	SLC9A3	5.68909	3.45178	3.09493	4.0786		ENSG00000066583	ISOC1	3.36171	25.0296	13.3939	13.9284		ENSG00000066777	ARFGEF1	22.3864	5.74038	137.079	55.0687		ENSG00000108774	RAB5C	163.2	57.0026	320.327	180.177
	ENSG00000066279	ASPM	12.5114	59.9682	65.2707	45.9168		ENSG00000066651	TRMT11	15.0417	8.84958	6.52301	10.1381		ENSG00000066827	ZFAT	6.63153	25.1994	14.9743	15.6017		ENSG00000196605	ZNF846	2.36902	392.918	145.082	180.123
	ENSG00000066294	CD84	3.69729	230.568	240.935	158.4		ENSG00000066654	THUMPD1	22.1024	4.8175	23.007	16.6423		ENSG00000066855	MTFR1	24.0601	5.65934	9.20132	12.9736		ENSG00000076604	TRAF4	15.1615	431.249	93.7889	180.066
	ENSG00000066322	ELOVL1	56.1224	134.46	139.715	110.099		ENSG00000066697	MSANTD3	10.4063	15.6392	5.87282	10.6394		ENSG00000066923	STAG3	156.289	25.8461	117.888	100.008		ENSG00000143436	MRPL9	180.677	254.467	104.761	179.968
	ENSG00000066336	SPI1	264.446	22.391	20.0258	102.287		ENSG00000066739	ATG2B	6.87599	22.5008	23.4164	17.5977		ENSG00000066926	FECH	17.3715	147.768	72.4504	79.1965		ENSG00000163931	TKT	534.47	2.20267	2.75614	179.809
	ENSG00000066379	POLR1H	131.129	13.3152	15.783	53.4091		ENSG00000066777	ARFGEF1	24.1338	11.9958	130.516	55.5484		ENSG00000066933	MYO9A	10.6821	16.5456	87.9729	38.4002		ENSG00000102103	PQBP1	247.874	56.2269	234.717	179.606
	ENSG00000066422	ZBTB11	20.9797	32.9406	33.6866	29.2023		ENSG00000066827	ZFAT	5.86946	6.58836	14.1398	8.86588		ENSG00000067057	PFKP	110.414	9.16471	41.346	53.6414		ENSG00000204370	SDHD	100.877	16.9319	420.635	179.481
	ENSG00000066427	ATXN3	14.4971	20.7909	19.7324	18.3402		ENSG00000066855	MTFR1	21.4342	23.6069	8.86869	17.9699		ENSG00000067064	IDI1	67.6887	115.057	3.49948	62.0818		ENSG00000126870	DYNC2I1	42.2091	18.8507	476.727	179.262
	ENSG00000066455	GOLGA5	32.4042	9.1502	9.26173	16.9387		ENSG00000066923	STAG3	127.291	5.84936	109.528	80.8894		ENSG00000067066	SP100	77.9677	76.8949	91.3661	82.0762		ENSG00000119537	KDSR	45.738	13.0447	478.768	179.183
	ENSG00000066557	LRRC40	18.5852	1.31353	1.1025	7.0004		ENSG00000066926	FECH	12.8838	23.3372	73.1821	36.4677		ENSG00000067082	KLF6	36.4802	85.122	75.6	65.7341		ENSG00000104490	NCALD	1.80923	30.4157	504.029	178.751
	ENSG00000066583	ISOC1	8.70178	25.4614	26.8875	20.3502		ENSG00000066933	MYO9A	8.54215	130.277	81.4286	73.416		ENSG00000067141	NEO1	4.89959	37.5106	2.35836	14.9229		ENSG00000088325	TPX2	335.43	174.668	25.9088	178.669
	ENSG00000066629	EML1	1.47961	27.8756	29.9049	19.7534		ENSG00000067057	PFKP	100.409	15.1813	38.6181	51.4027		ENSG00000067167	TRAM1	92.0545	1.57407	3.89392	32.5075		ENSG00000126432	PRDX5	331.008	198.841	4.91249	178.254
	ENSG00000066651	TRMT11	26.0726	16.1345	14.6514	18.9528		ENSG00000067064	IDI1	68.2334	9.20492	1.43228	26.2902		ENSG00000067182	TNFRSF1A	84.5447	3.7216	1024.28	370.847		ENSG00000198712	MT-CO2	484.235	13.4212	36.5646	178.074
	ENSG00000066654	THUMPD1	29.5742	6.04318	6.875	14.1641		ENSG00000067066	SP100	97.9464	108.057	3.62412	69.8758		ENSG00000067208	EVI5	2.15458	105.077	15.0384	40.7566		ENSG00000115446	UNC50	40.2935	480.927	12.337	177.852
	ENSG00000066697	MSANTD3	15.215	36.196	34.7447	28.7185		ENSG00000067082	KLF6	34.6289	71.2099	95.4757	67.1048		ENSG00000067221	STOML1	2.71522	87.3513	22.8317	37.6327		ENSG00000198142	SOWAHC	1.7525	493.622	35.5724	176.982
	ENSG00000066739	ATG2B	7.61159	6.33349	6.49401	6.81303		ENSG00000067113	PLPP1	1.61024	102.614	74.4338	59.5528		ENSG00000067225	PKM	1049.68	2.96997	12.409	355.019		ENSG00000240509	RPL34P18	6.01639	520.777	3.45424	176.749
	ENSG00000066777	ARFGEF1	31.2154	35.5087	31.8993	32.8745		ENSG00000067141	NEO1	3.83983	36.1996	3.52943	14.523		ENSG00000067248	DHX29	15.4949	2.84385	13.5024	10.6137		ENSG00000198408	OGA	53.237	243.27	233.618	176.708
	ENSG00000066827	ZFAT	7.20586	188.147	190.212	128.522		ENSG00000067167	TRAM1	93.2445	3.61546	3.57227	33.4774		ENSG00000067334	DNTTIP2	27.3544	997.078	4.90414	343.112		ENSG00000130159	ECSIT	64.1341	97.0108	367.314	176.153
	ENSG00000066855	MTFR1	31.0306	26.5481	16.8372	24.8053		ENSG00000067182	TNFRSF1A	75.8676	96.1741	911.357	361.133		ENSG00000067365	METTL22	18.4594	14.621	629.948	221.009		ENSG00000163466	ARPC2	408.152	104.347	15.7136	176.071
	ENSG00000066923	STAG3	188.256	10.9236	9.70366	69.6277		ENSG00000067208	EVI5	3.05695	71.8923	17.1313	30.6935		ENSG00000067369	TP53BP1	11.5971	26.5023	22.0184	20.0392		ENSG00000101972	STAG2	48.9774	448.983	29.5625	175.841
	ENSG00000066926	FECH	21.3985	119.141	120.659	87.066		ENSG00000067221	STOML1	3.74728	2.88401	28.7843	11.8052		ENSG00000067533	RRP15	4.7999	12.6257	4.83224	7.41928		ENSG00000115839	RAB3GAP1	44.6847	99.7719	383.03	175.829
	ENSG00000066933	MYO9A	11.3129	78.7641	83.1102	57.7291		ENSG00000067225	PKM	917.79	2.97851	13.3864	311.385		ENSG00000067560	RHOA	570.344	12.0891	59.6314	214.022		ENSG00000139921	TMX1	38.5872	440.5	48.3235	175.804
	ENSG00000067057	PFKP	125.497	98.4884	99.466	107.817		ENSG00000067248	DHX29	16.5388	928.49	10.8231	318.617		ENSG00000067596	DHX8	34.6941	4.94065	55.7993	31.8114		ENSG00000112308	C6orf62	59.0816	174.881	293.274	175.746
	ENSG00000067064	IDI1	81.4368	38.159	38.4227	52.6728		ENSG00000067334	DNTTIP2	26.2245	18.1077	5.04557	16.4593		ENSG00000067606	PRKCZ	4.36885	630.592	14.4463	216.469		ENSG00000109790	KLHL5	13.9444	503.819	8.31891	175.361
	ENSG00000067066	SP100	94.5174	1.79335	1.81479	32.7085		ENSG00000067365	METTL22	12.6473	29.8343	624.343	222.275		ENSG00000067704	IARS2	59.6308	23.5837	5.29186	29.5021		ENSG00000144021	CIAO1	63.276	458.05	3.13638	174.821
	ENSG00000067082	KLF6	36.6396	4.53309	4.46916	15.214		ENSG00000067369	TP53BP1	11.5254	10.7328	22.8178	15.0253		ENSG00000067829	IDH3G	54.6904	5.61257	28.7501	29.6843		ENSG00000128040	SPINK2	2.06816	10.1581	511.194	174.473
	ENSG00000067113	PLPP1	1.49449	110.827	111.98	74.7669		ENSG00000067533	RRP15	5.22284	11.5658	6.52435	7.77101		ENSG00000067836	ROGDI	14.9307	60.726	32.8555	36.1707		ENSG00000112335	SNX3	172.995	327.594	22.8086	174.466
	ENSG00000067141	NEO1	4.38885	114.13	129.65	82.7229		ENSG00000067560	RHOA	234.363	6.05286	59.816	100.077		ENSG00000067842	ATP2B3	4.55408	57.3947	13.5295	25.1594		ENSG00000099331	MYO9B	164.169	197.971	157.745	173.295
	ENSG00000067167	TRAM1	107.073	3.41316	2.84035	37.7755		ENSG00000067596	DHX8	31.1443	639.593	45.9241	238.887		ENSG00000067900	ROCK1	20.9103	20.0787	6.48275	15.8239		ENSG00000119655	NPC2	481.125	32.8349	5.88468	173.282
	ENSG00000067182	TNFRSF1A	133.82	7.81693	6.70535	49.4473		ENSG00000067606	PRKCZ	6.5866	31.8177	13.198	17.2008		ENSG00000067955	CBFB	31.3244	4.16842	148.715	61.4026		ENSG00000167721	TSR1	22.8198	226.94	267.555	172.438
	ENSG00000067208	EVI5	4.00235	798.742	782.851	528.532		ENSG00000067704	IARS2	55.9892	6.63142	5.01685	22.5458		ENSG00000067992	PDK3	11.9492	20.814	2.59709	11.7868		ENSG00000158473	CD1D	1.91096	36.3806	478.951	172.414
	ENSG00000067221	STOML1	7.38859	21.046	19.5673	16.0006		ENSG00000067829	IDH3G	48.0712	58.7116	30.2014	45.6614		ENSG00000068001	HYAL2	6.04296	35.4669	3.66404	15.058		ENSG00000023191	RNH1	230.153	25.2498	261.467	172.29
	ENSG00000067225	PKM	780.64	28.5446	28.2393	279.141		ENSG00000067836	ROGDI	11.6206	45.8813	33.0133	30.1718		ENSG00000068028	RASSF1	150.94	10.7153	56.7956	72.8169		ENSG00000204308	RNF5	119.175	323.764	73.6823	172.207
	ENSG00000067248	DHX29	20.3709	17.0581	17.5697	18.3329		ENSG00000067842	ATP2B3	3.83348	12.254	13.4946	9.86071		ENSG00000068097	HEATR6	3.58567	9.37668	13.1941	8.71883		ENSG00000110851	PRDM4	14.244	249.444	252.419	172.036
	ENSG00000067334	DNTTIP2	29.5797	16.8092	16.8784	21.0891		ENSG00000067900	ROCK1	29.3345	3.81638	5.91153	13.0208		ENSG00000068120	COASY	52.9498	144.194	17.6703	71.6047		ENSG00000117543	DPH5	38.2678	25.697	451.764	171.91
	ENSG00000067365	METTL22	18.0967	9.15752	8.47095	11.9084		ENSG00000067955	CBFB	29.6825	30.9311	134.801	65.1381		ENSG00000068137	PLEKHH3	10.123	3.86036	59.3292	24.4375		ENSG00000178951	ZBTB7A	26.9136	486.2	2.23092	171.781
	ENSG00000067369	TP53BP1	16.9486	781.889	752.001	516.946		ENSG00000067992	PDK3	12.2259	33.4007	1.96511	15.8639		ENSG00000068305	MEF2A	13.6875	52.4334	77.8686	47.9965		ENSG00000172175	MALT1	8.34503	497.655	9.21962	171.74
	ENSG00000067533	RRP15	8.66497	44.3929	41.2195	31.4258		ENSG00000068001	HYAL2	5.85634	12.2681	4.96342	7.69594		ENSG00000068308	OTUD5	58.1753	10.9231	15.298	28.1322		ENSG00000239856	RN7SL225P	2.3851	4.62849	507.537	171.517
	ENSG00000067560	RHOA	775.504	6.57464	5.13135	262.403		ENSG00000068028	RASSF1	72.8812	4.68818	51.3955	42.9883		ENSG00000068323	TFE3	79.8964	11.9409	26.1732	39.3368		ENSG00000115461	IGFBP5	5.91515	4.77176	502.088	170.925
	ENSG00000067596	DHX8	41.3297	80.6227	82.3834	68.112		ENSG00000068079	IFI35	1.36366	65.5906	9.98672	25.647		ENSG00000068354	TBC1D25	18.5764	54.8211	18.3274	30.5749		ENSG00000106211	HSPB1	482.496	9.82827	19.9886	170.771
	ENSG00000067606	PRKCZ	5.49091	54.0471	57.0909	38.8763		ENSG00000068097	HEATR6	4.04868	1.6159	13.2322	6.29894		ENSG00000068366	ACSL4	24.1368	78.6641	46.363	49.7213		ENSG00000010295	IFFO1	33.5189	118.72	358.625	170.288
	ENSG00000067704	IARS2	78.796	25.9883	25.0144	43.2662		ENSG00000068120	COASY	49.1582	4.88981	47.5612	33.8697		ENSG00000068383	INPP5A	20.9008	15.1676	58.9014	31.6566		ENSG00000136699	SMPD4	75.083	29.6586	405.538	170.093
	ENSG00000067829	IDH3G	52.8493	4.29679	4.92801	20.6914		ENSG00000068137	PLEKHH3	12.4299	51.6779	83.0843	49.064		ENSG00000068394	GPKOW	49.8904	26.229	45.1204	40.4133		ENSG00000116688	MFN2	71.1934	5.36485	431.963	169.507
	ENSG00000067836	ROGDI	28.2557	36.099	34.0388	32.7978		ENSG00000068305	MEF2A	13.5717	12.338	13.7796	13.2297		ENSG00000068400	GRIPAP1	54.4133	19.5137	71.6171	48.5147		ENSG00000179010	MRFAP1	404.567	82.6339	20.1906	169.13
	ENSG00000067842	ATP2B3	4.2012	47.5716	46.8683	32.8804		ENSG00000068308	OTUD5	43.2728	14.0317	26.6305	27.9783		ENSG00000068438	FTSJ1	49.0005	42.4087	64.5937	52.0009		ENSG00000116670	MAD2L2	91.3568	412.194	3.4447	168.999
	ENSG00000067900	ROCK1	36.6764	11.3262	10.8071	19.6032		ENSG00000068323	TFE3	80.6711	57.4984	18.5852	52.2516		ENSG00000068489	PRR11	69.1468	54.5703	7.84433	43.8538		ENSG00000205758	CRYZL1	13.6994	475.242	17.5183	168.82
	ENSG00000067955	CBFB	47.2627	12.2826	10.4346	23.3267		ENSG00000068354	TBC1D25	14.0582	77.9697	38.4323	43.4867		ENSG00000068650	ATP11A	51.7204	49.1106	120.25	73.6938		ENSG00000106682	EIF4H	380.307	110.108	15.9523	168.789
	ENSG00000067992	PDK3	10.9022	188.963	186.508	128.791		ENSG00000068366	ACSL4	26.7211	13.7208	59.9364	33.4595		ENSG00000068654	POLR1A	8.85558	69.4914	51.4202	43.2557		ENSG00000134250	NOTCH2	25.6443	449.501	30.953	168.7
	ENSG00000068001	HYAL2	15.9849	1.28483	1.57705	6.28226		ENSG00000068383	INPP5A	19.2223	27.7675	45.5155	30.8351		ENSG00000068697	LAPTM4A	130.699	73.0544	80.1197	94.6243		ENSG00000014123	UFL1	14.5496	268.182	223.121	168.618
	ENSG00000068028	RASSF1	186.555	7.99094	7.42818	67.3248		ENSG00000068394	GPKOW	40.8272	19.5736	74.121	44.8406		ENSG00000068724	TTC7A	50.0376	8.7865	8.50883	22.4443		ENSG00000100731	PCNX1	20.1859	212.191	270.877	167.751
	ENSG00000068079	IFI35	1.40665	65.8717	68.1829	45.1537		ENSG00000068400	GRIPAP1	59.6789	40.6893	61.6566	54.0082		ENSG00000068745	IP6K2	73.1915	110.017	26.0168	69.7418		ENSG00000146701	MDH2	394.102	13.0825	93.0941	166.76
	ENSG00000068097	HEATR6	8.37378	12.9889	13.6728	11.6785		ENSG00000068438	FTSJ1	45.8258	56.3439	8.53077	36.9002		ENSG00000068784	SRBD1	7.70179	50.6188	46.9379	35.0862		ENSG00000136628	EPRS1	96.5168	397.134	5.64108	166.431
	ENSG00000068120	COASY	70.2146	19.9635	17.1209	35.7664		ENSG00000068489	PRR11	68.2964	45.3726	119.419	77.696		ENSG00000068796	KIF2A	25.5829	77.8046	24.6711	42.6862		ENSG00000026297	RNASET2	69.5432	355.771	73.8903	166.402
	ENSG00000068137	PLEKHH3	15.5732	61.557	60.9077	46.0126		ENSG00000068650	ATP11A	54.9049	67.4746	46.0988	56.1595		ENSG00000068831	RASGRP2	41.6059	6.71379	6.98238	18.434		ENSG00000118454	ANKRD13C	8.69138	461.664	27.8617	166.072
	ENSG00000068305	MEF2A	19.5291	67.5183	69.2581	52.1018		ENSG00000068654	POLR1A	9.04849	64.0809	73.4234	48.8509		ENSG00000068878	PSME4	28.5579	24.3441	75.461	42.7877		ENSG00000122299	ZC3H7A	46.7128	392.858	58.6279	166.066
	ENSG00000068308	OTUD5	63.6377	21.1954	17.8713	34.2348		ENSG00000068697	LAPTM4A	116.757	8.87983	8.71514	44.7839		ENSG00000068885	IFT80	5.95077	43.7775	48.441	32.7231		ENSG00000091732	ZC3HC1	19.5621	98.786	379.712	166.02
	ENSG00000068323	TFE3	71.4973	41.0111	39.687	50.7318		ENSG00000068724	TTC7A	47.9004	111.616	25.236	61.5843		ENSG00000068903	SIRT2	91.0894	25.1032	8.28513	41.4926		ENSG00000110696	C11orf58	79.9865	199.451	218.51	165.983
	ENSG00000068354	TBC1D25	20.3392	28.6672	27.488	25.4981		ENSG00000068745	IP6K2	73.2066	45.2429	38.0937	52.1811		ENSG00000068912	ERLEC1	57.2959	7.48599	6.2013	23.6611		ENSG00000169045	HNRNPH1	406.828	71.6264	19.2639	165.906
	ENSG00000068366	ACSL4	39.9389	60.801	58.951	53.2303		ENSG00000068784	SRBD1	5.92212	77.9059	26.4791	36.769		ENSG00000068971	PPP2R5B	8.54941	91.1761	18.8203	39.5153		ENSG00000213626	LBH	1.9635	493.809	1.71245	165.828
	ENSG00000068383	INPP5A	26.6557	87.1034	82.95	65.5697		ENSG00000068796	KIF2A	25.6804	7.7457	8.57297	13.9997		ENSG00000069011	PITX1	3.72126	53.736	97.9337	51.797		ENSG00000106245	BUD31	175.04	70.8618	250.925	165.609
	ENSG00000068394	GPKOW	58.9443	70.6765	75.6373	68.4194		ENSG00000068831	RASGRP2	37.7076	25.4839	81.323	48.1715		ENSG00000069248	NUP133	18.3134	9.04539	44.1608	23.8399		ENSG00000196656	-	431.427	62.9487	2.33938	165.572
	ENSG00000068400	GRIPAP1	86.0071	87.9327	85.632	86.524		ENSG00000068878	PSME4	26.3985	38.6081	54.2169	39.7412		ENSG00000069275	NUCKS1	100.992	1.82512	43.4082	48.7417		ENSG00000176340	COX8A	437.128	44.0606	15.0134	165.401
	ENSG00000068438	FTSJ1	71.8187	91.2894	86.0966	83.0682		ENSG00000068885	IFT80	7.74622	26.9687	7.16146	13.9588		ENSG00000069329	VPS35	40.4689	21.3341	17.564	26.4557		ENSG00000104613	INTS10	96.9738	73.7742	325.36	165.369
	ENSG00000068489	PRR11	85.0757	15.0459	15.003	38.3749		ENSG00000068903	SIRT2	52.8073	6.91899	4.20538	21.3106		ENSG00000069345	DNAJA2	44.3322	94.0836	330.246	156.221		ENSG00000086544	ITPKC	12.1117	23.2936	459.356	164.92
	ENSG00000068650	ATP11A	89.075	116.291	115.001	106.789		ENSG00000068912	ERLEC1	52.3106	82.9221	22.5492	52.594		ENSG00000069399	BCL3	14.9302	39.9818	7.13029	20.6807		ENSG00000178700	DHFR2	5.51451	12.5881	475.915	164.672
	ENSG00000068654	POLR1A	16.6951	52.5689	54.8669	41.3769		ENSG00000068971	PPP2R5B	7.95256	54.077	100.668	54.2325		ENSG00000069424	KCNAB2	343.966	47.7693	27.5452	139.76		ENSG00000089280	FUS	368.621	16.0783	103.073	162.591
	ENSG00000068697	LAPTM4A	112.284	92.9139	91.1312	98.7765		ENSG00000068976	PYGM	1.10936	7.46482	39.9174	16.1639		ENSG00000069493	CLEC2D	9.60535	13.131	7.29295	10.0098		ENSG00000108828	VAT1	455.17	2.70144	29.7496	162.54
	ENSG00000068724	TTC7A	57.0622	11.6565	10.718	26.4789		ENSG00000069011	PITX1	4.27952	3.69474	47.7129	18.5624		ENSG00000069509	FUNDC1	26.3522	345.692	76.7436	149.596		ENSG00000051180	RAD51	20.7001	60.5549	406.264	162.506
	ENSG00000068745	IP6K2	86.2673	50.1162	48.5642	61.6492		ENSG00000069248	NUP133	20.6685	20.7153	14.1546	18.5128		ENSG00000069702	TGFBR3	3.58596	10.9561	8.40813	7.65008		ENSG00000101901	ALG13	7.37474	39.1666	439.947	162.163
	ENSG00000068784	SRBD1	11.6065	61.3248	58.5085	43.8133		ENSG00000069275	NUCKS1	99.0599	102.635	323.178	174.958		ENSG00000069764	PLA2G10	1.18345	31.3073	8.57986	13.6902		ENSG00000196850	PPTC7	20.5422	452.662	12.4123	161.872
	ENSG00000068796	KIF2A	45.6876	44.2416	42.8504	44.2599		ENSG00000069329	VPS35	37.3301	39.2312	9.76858	28.7766		ENSG00000069849	ATP1B3	79.6478	1.48802	15.6129	32.2496		ENSG00000166435	XRRA1	8.09321	96.7719	380.421	161.762
	ENSG00000068831	RASGRP2	64.0008	12.5082	11.988	29.499		ENSG00000069345	DNAJA2	45.4547	45.7007	26.8167	39.324		ENSG00000069869	NEDD4	6.24335	5.30879	14.0222	8.52479		ENSG00000178980	SELENOW	73.05	332.062	79.4547	161.522
	ENSG00000068878	PSME4	42.4054	118.638	119.166	93.4032		ENSG00000069399	BCL3	14.6333	12.49	6.67501	11.2661		ENSG00000069943	PIGB	10.781	1.67312	42.7658	18.4066		ENSG00000126247	CAPNS1	185.951	72.1841	225.879	161.338
	ENSG00000068885	IFT80	10.4972	63.3862	64.1001	45.9945		ENSG00000069424	KCNAB2	314.563	311.123	1.15461	208.947		ENSG00000069956	MAPK6	18.3951	80.802	55.9465	51.7145		ENSG00000169020	ATP5ME	442.543	17.892	23.2956	161.243
	ENSG00000068903	SIRT2	114.824	11.0556	10.4265	45.4354		ENSG00000069493	CLEC2D	10.0487	11.5533	79.6718	33.758		ENSG00000069966	GNB5	15.9138	7.85741	34.7587	19.51		ENSG00000031698	SARS1	143.385	338.171	1.75241	161.103
	ENSG00000068912	ERLEC1	58.4107	7.32931	7.86153	24.5338		ENSG00000069509	FUNDC1	25.7535	28.4708	8.04923	20.7578		ENSG00000069974	RAB27A	39.3243	6.94185	27.5569	24.6077		ENSG00000127184	COX7C	349	25.7892	108.367	161.052
	ENSG00000068971	PPP2R5B	11.5728	1.01344	31.3972	14.6612		ENSG00000069702	TGFBR3	5.29594	5.12905	6.93099	5.78533		ENSG00000069998	HDHD5	49.1007	14.6364	15.0311	26.2561		ENSG00000161960	EIF4A1	429.068	6.29979	47.4609	160.943
	ENSG00000069011	PITX1	8.56541	32.4172	139.985	60.3226		ENSG00000069764	PLA2G10	1.49873	1.78318	16.8062	6.69604		ENSG00000070010	UFD1	37.9885	12.1368	330.09	126.739		ENSG00000105968	H2AZ2	184.818	278.742	19.1512	160.904
	ENSG00000069248	NUP133	30.5499	142.863	54.1642	75.8591		ENSG00000069849	ATP1B3	86.0237	81.765	12.2535	60.0141		ENSG00000070047	PHRF1	26.1203	46.293	1.68789	24.7004		ENSG00000139631	CSAD	5.34314	139.981	336.537	160.62
	ENSG00000069275	NUCKS1	135.814	57.7167	56.2974	83.2761		ENSG00000069869	NEDD4	7.64964	7.77964	43.5909	19.6734		ENSG00000070061	ELP1	16.0588	56.6661	12.0423	28.2557		ENSG00000171443	ZNF524	33.6668	44.9202	402.611	160.399
	ENSG00000069329	VPS35	55.583	56.6544	17.9226	43.3867		ENSG00000069943	PIGB	8.6944	6.54428	43.9919	19.7435		ENSG00000070081	NUCB2	307.214	44.6975	20.8464	124.253		ENSG00000158457	TSPAN33	17.0246	454.033	10.015	160.358
	ENSG00000069345	DNAJA2	56.3605	16.7639	320.394	131.173		ENSG00000069956	MAPK6	14.2933	17.0704	39.2191	23.5276		ENSG00000070182	SPTB	3.67263	23.043	8.38209	11.6992		ENSG00000122882	ECD	16.1775	428.87	35.4069	160.151
	ENSG00000069399	BCL3	16.4415	304.291	5.27518	108.669		ENSG00000069966	GNB5	13.0053	14.5566	23.0775	16.8798		ENSG00000070190	DAPP1	10.0438	14.7037	10.6425	11.7966		ENSG00000207721	MIR186	4.94441	16.2936	459.119	160.119
	ENSG00000069424	KCNAB2	334.311	5.4877	39.5147	126.438		ENSG00000069974	RAB27A	42.0268	41.9132	15.6526	33.1975		ENSG00000070214	SLC44A1	21.1633	301.485	11.1642	111.271		ENSG00000236675	MTX1P1	19.1313	5.8395	455.358	160.11
	ENSG00000069493	CLEC2D	6.04257	35.0629	5.53864	15.548		ENSG00000069998	HDHD5	47.5537	41.235	319.294	136.027		ENSG00000070269	TMEM260	7.41501	2.62303	22.1317	10.7232		ENSG00000123144	TRIR	453.29	3.00038	23.4766	159.923
	ENSG00000069509	FUNDC1	36.1553	6.13343	110.788	51.0257		ENSG00000070010	UFD1	35.9285	28.5102	2.58142	22.3401		ENSG00000070366	SMG6	17.4152	10.5006	13.6456	13.8538		ENSG00000163479	SSR2	365.741	36.2738	77.5507	159.855
	ENSG00000069702	TGFBR3	5.50922	105.585	13.2999	41.4647		ENSG00000070047	PHRF1	24.3841	23.6739	10.1731	19.4104		ENSG00000070367	EXOC5	12.0354	28.3678	29.1337	23.179		ENSG00000176209	SMIM19	10.8448	407.226	61.2617	159.777
	ENSG00000069849	ATP1B3	113.617	14.4097	11.9009	46.6426		ENSG00000070061	ELP1	17.179	16.3058	19.951	17.8119		ENSG00000070371	CLTCL1	26.0199	9.51183	36.2523	23.928		ENSG00000121691	CAT	140.14	324.926	11.6012	158.889
	ENSG00000069869	NEDD4	14.3817	12.5498	32.4834	19.805		ENSG00000070081	NUCB2	315.418	316.777	10.7099	214.302		ENSG00000070404	FSTL3	18.6504	13.0273	12.6262	14.768		ENSG00000143753	DEGS1	36.1883	126.271	313.842	158.767
	ENSG00000069943	PIGB	10.7194	33.1474	18.4533	20.7734		ENSG00000070182	SPTB	2.78542	2.33594	13.5067	6.20935		ENSG00000070413	DGCR2	30.0156	10.1431	21.1567	20.4385		ENSG00000204267	TAP2	19.407	2.25649	454.26	158.641
	ENSG00000069956	MAPK6	32.5581	20.6755	72.5152	41.9163		ENSG00000070190	DAPP1	10.9458	11.0687	11.9181	11.3109		ENSG00000070423	RNF126	32.3363	22.5905	42.517	32.4813		ENSG00000166136	NDUFB8	372.421	48.79	53.6853	158.299
	ENSG00000069966	GNB5	21.6457	69.5921	48.2342	46.4907		ENSG00000070214	SLC44A1	19.7284	20.0922	19.483	19.7679		ENSG00000070444	MNT	12.9234	15.8421	39.585	22.7835		ENSG00000196502	SULT1A1	23.7378	28.0907	422.852	158.227
	ENSG00000069974	RAB27A	69.7509	44.7656	37.1644	50.5603		ENSG00000070269	TMEM260	9.68922	9.06739	13.6094	10.7887		ENSG00000070476	ZXDC	19.5155	28.4493	28.9039	25.6229		ENSG00000118640	VAMP8	440.817	11.9955	21.5298	158.114
	ENSG00000069998	HDHD5	52.1413	39.492	27.0949	39.576		ENSG00000070366	SMG6	13.2842	12.5827	30.9043	18.9237		ENSG00000070495	JMJD6	55.0794	37.9693	14.5481	35.8656		ENSG00000173064	HECTD4	13.7445	178.507	280.549	157.6
	ENSG00000070010	UFD1	36.8789	26.2232	23.6083	28.9035		ENSG00000070367	EXOC5	11.1943	11.9929	31.392	18.1931		ENSG00000070501	POLB	38.5377	12.772	42.9255	31.4118		ENSG00000002822	MAD1L1	85.7652	89.8271	293.678	156.423
	ENSG00000070047	PHRF1	29.6806	25.4508	382.171	145.768		ENSG00000070371	CLTCL1	21.4658	27.1827	12.2736	20.3074		ENSG00000070540	WIPI1	33.2108	23.0226	64.2287	40.154		ENSG00000168887	C2orf68	24.7188	27.3509	415.942	156.004
	ENSG00000070061	ELP1	25.0394	377.525	6.80325	136.456		ENSG00000070404	FSTL3	14.1191	16.4869	21.6364	17.4141		ENSG00000070610	GBA2	15.3208	71.572	5.43985	30.7775		ENSG00000160932	LY6E	128.721	16.8908	322.052	155.888
	ENSG00000070081	NUCB2	370.725	6.39438	7.37301	128.164		ENSG00000070413	DGCR2	30.2048	29.1471	65.6292	41.6604		ENSG00000070614	NDST1	39.8577	49.2005	2968.6	1019.22		ENSG00000235174	RPL39P3	459.18	4.99544	2.63518	155.604
	ENSG00000070182	SPTB	5.5258	9.00925	31.1994	15.2448		ENSG00000070423	RNF126	32.817	28.1927	41.264	34.0913		ENSG00000070669	ASNS	55.4283	33.3295	37.2389	41.9989		ENSG00000143493	INTS7	20.5924	6.11774	439.696	155.469
	ENSG00000070190	DAPP1	7.69789	19.4361	9.42115	12.1851		ENSG00000070444	MNT	12.9879	13.3885	37.0881	21.1548		ENSG00000070718	AP3M2	10.2016	17.5249	75.0834	34.27		ENSG00000110934	BIN2	112.647	349.549	2.60981	154.935
	ENSG00000070214	SLC44A1	18.1316	10.4015	12.4256	13.6529		ENSG00000070476	ZXDC	17.5675	17.3016	18.5064	17.7918		ENSG00000070756	PABPC1	2944.08	34.0212	11.9469	996.683		ENSG00000100325	ASCC2	39.9581	349.201	75.0781	154.746
	ENSG00000070269	TMEM260	12.0175	12.4322	17.8885	14.1127		ENSG00000070495	JMJD6	49.7943	49.6883	34.7516	44.7447		ENSG00000070761	CFAP20	43.4846	73.4492	57.4563	58.13		ENSG00000126775	ATG14	6.3854	418.506	38.58	154.49
	ENSG00000070366	SMG6	13.3785	16.2291	24.2182	17.9419		ENSG00000070501	POLB	43.5547	47.8772	56.9113	49.4477		ENSG00000070770	CSNK2A2	54.2598	7.33251	110.624	57.4055		ENSG00000003056	M6PR	190.525	259.439	13.3047	154.423
	ENSG00000070367	EXOC5	27.53	24.1452	23.3906	25.0219		ENSG00000070540	WIPI1	31.748	34.7781	8.31804	24.948		ENSG00000070785	EIF2B3	12.6089	2994.22	10.0599	1005.63		ENSG00000105197	TIMM50	46.1462	344.837	71.4748	154.153
	ENSG00000070371	CLTCL1	25.4323	20.959	33.4046	26.5986		ENSG00000070610	GBA2	17.5024	18.7096	2328.2	788.137		ENSG00000070814	TCOF1	57.2842	1.21956	15.2807	24.5948		ENSG00000234964	FABP5P7	15.7595	443.94	1.8753	153.858
	ENSG00000070404	FSTL3	25.7497	31.9532	52.9534	36.8854		ENSG00000070614	NDST1	35.7528	33.9263	39.3973	36.3588		ENSG00000070831	CDC42	86.5746	48.3376	9.53443	48.1489		ENSG00000210196	MT-TP	442.621	9.76265	8.08894	153.491
	ENSG00000070413	DGCR2	32.0905	38.6495	19.1996	29.9799		ENSG00000070669	ASNS	54.4655	62.0648	76.2494	64.2599		ENSG00000070882	OSBPL3	11.514	67.7097	67.27	48.8312		ENSG00000092199	HNRNPC	443.518	12.0791	4.7175	153.438
	ENSG00000070423	RNF126	62.4905	17.9957	22.224	34.2368		ENSG00000070718	AP3M2	7.70177	7.31991	11.2272	8.74961		ENSG00000070950	RAD18	17.8115	9.20914	63.1569	30.0592		ENSG00000008128	CDK11A	143.585	157.426	159.269	153.427
	ENSG00000070444	MNT	18.6817	23.6219	41.5765	27.9601		ENSG00000070756	PABPC1	2321.72	2560.56	53.4824	1645.25		ENSG00000070961	ATP2B1	10.3022	55.8885	10.0509	25.4138		ENSG00000089177	KIF16B	5.76789	228.437	224.805	153.003
	ENSG00000070476	ZXDC	28.3313	38.8287	55.2274	40.7958		ENSG00000070761	CFAP20	40.8502	37.8006	80.2419	52.9643		ENSG00000071051	NCK2	70.1187	83.3467	4980.52	1711.33		ENSG00000177105	RHOG	113.574	342.734	2.21876	152.842
	ENSG00000070495	JMJD6	41.649	60.3367	32.9892	44.9916		ENSG00000070770	CSNK2A2	76.6445	76.5821	10.9538	54.7268		ENSG00000071054	MAP4K4	70.7386	11.2335	206.267	96.0799		ENSG00000089195	TRMT6	22.4027	407.245	28.6536	152.767
	ENSG00000070501	POLB	54.6027	37.5047	25.3077	39.1384		ENSG00000070785	EIF2B3	11.1745	9.68926	15.6315	12.1651		ENSG00000071073	MGAT4A	11.559	16.5983	13.5515	13.9029		ENSG00000234420	ZNF37BP	3.47835	2.91582	451.425	152.606
	ENSG00000070540	WIPI1	36.0811	25.3929	47.8979	36.4573		ENSG00000070814	TCOF1	51.987	51.7179	8.79513	37.5		ENSG00000071082	RPL31	4962.13	8.73016	1.63541	1657.5		ENSG00000206503	HLA-A	443.096	6.3823	8.14922	152.542
	ENSG00000070610	GBA2	25.5557	46.5866	115.711	62.6178		ENSG00000070831	CDC42	84.2788	93.2954	69.2485	82.2742		ENSG00000071127	WDR1	168.673	65.9019	13.3697	82.6482		ENSG00000133048	CHI3L1	99.0514	330.219	27.7848	152.352
	ENSG00000070614	NDST1	50.101	115.199	13.3006	59.5336		ENSG00000070882	OSBPL3	10.7757	9.96251	53.0127	24.5836		ENSG00000071189	SNX13	12.6625	61.3091	6.18612	26.7192		ENSG00000100300	TSPO	117.544	30.0896	308.671	152.101
	ENSG00000070669	ASNS	50.1221	13.3793	1893.74	652.414		ENSG00000070950	RAD18	16.3017	17.1539	10.9047	14.7868		ENSG00000071205	ARHGAP10	2.2593	10.3032	22.3787	11.6471		ENSG00000198089	SFI1	22.9357	2.11356	431.006	152.018
	ENSG00000070718	AP3M2	12.8255	1948.23	67.3404	676.131		ENSG00000070961	ATP2B1	9.16003	9.46914	5476.46	1831.7		ENSG00000071242	RPS6KA2	14.0868	4953.44	130.866	1699.46		ENSG00000105401	CDC37	298.455	52.5271	104.159	151.714
	ENSG00000070756	PABPC1	1866.7	68.7913	73.7495	669.747		ENSG00000071051	NCK2	70.8397	68.344	187.366	108.85		ENSG00000071243	ING3	9.05584	212.53	30.9807	84.1887		ENSG00000066379	POLR1H	112.401	157.932	184.325	151.552
	ENSG00000070761	CFAP20	71.9132	85.8476	25.676	61.1456		ENSG00000071054	MAP4K4	55.9109	59.7948	11.6437	42.4498		ENSG00000071246	VASH1	19.9908	12.1073	20.4759	17.5247		ENSG00000123064	DDX54	42.8958	25.3526	386.392	151.547
	ENSG00000070770	CSNK2A2	74.0792	27.4233	71.3576	57.6201		ENSG00000071073	MGAT4A	10.1067	11.4427	2.38647	7.97864		ENSG00000071462	BUD23	128.299	3.23713	113.207	81.5811		ENSG00000135838	NPL	3.74213	342.789	107.953	151.495
	ENSG00000070785	EIF2B3	21.6895	72.0368	116.101	69.9425		ENSG00000071082	RPL31	5407.73	5100.53	12.6249	3506.96		ENSG00000071537	SEL1L	30.6183	11.8834	75.3589	39.2869		ENSG00000104863	LIN7B	10.6559	327.059	115.726	151.147
	ENSG00000070814	TCOF1	75.7507	124.082	16.9157	72.2496		ENSG00000071127	WDR1	182.691	183.916	7.94515	124.851		ENSG00000071539	TRIP13	19.454	8.92608	12.2413	13.5404		ENSG00000166794	PPIB	394.766	31.7667	26.7898	151.107
	ENSG00000070831	CDC42	136.163	18.6732	25.1331	59.99		ENSG00000071189	SNX13	12.4322	13.4041	21.0927	15.643		ENSG00000071553	ATP6AP1	114.205	22.55	165.612	100.789		ENSG00000160633	SAFB	143.337	300.578	9.21028	151.042
	ENSG00000070882	OSBPL3	17.4679	25.3783	15.5921	19.4794		ENSG00000071205	ARHGAP10	2.39738	2.41678	102.988	35.934		ENSG00000071564	TCF3	85.8277	123.687	28.9316	79.4822		ENSG00000198520	ARMH1	225.86	192.18	34.3981	150.813
	ENSG00000070950	RAD18	25.3638	14.6806	80.5749	40.2065		ENSG00000071242	RPS6KA2	12.2879	11.9452	30.2357	18.1563		ENSG00000071575	TRIB2	13.5099	27.3535	40.4635	27.109		ENSG00000204356	NELFE	92.85	136.104	222.285	150.413
	ENSG00000070961	ATP2B1	15.8571	69.9802	101.582	62.4731		ENSG00000071243	ING3	8.85299	8.06395	16.5021	11.1397		ENSG00000071626	DAZAP1	136.64	19.2681	138.645	98.1843		ENSG00000136810	TXN	426.94	9.09573	13.6828	149.906
	ENSG00000071051	NCK2	85.466	111.11	9.51815	68.6981		ENSG00000071246	VASH1	21.4885	21.4978	96.883	46.6231		ENSG00000071655	MBD3	50.1421	109.184	36.1471	65.1578		ENSG00000137073	UBAP2	35.5734	92.3954	321.701	149.89
	ENSG00000071054	MAP4K4	102.2	10.9183	3154.95	1089.36		ENSG00000071462	BUD23	108.075	110.39	62.1871	93.5509		ENSG00000071794	HLTF	38.7069	77.9037	129.867	82.1594		ENSG00000146535	GNA12	29.0114	60.9796	359.382	149.791
	ENSG00000071073	MGAT4A	9.3405	3139.11	313.69	1154.05		ENSG00000071537	SEL1L	30.4134	32.2321	12.0792	24.9082		ENSG00000071859	FAM50A	142.073	13.6246	57.3293	71.009		ENSG00000236365	EIF3MP1	2.92596	2.46581	443.358	149.583
	ENSG00000071082	RPL31	3140.26	322.241	18.326	1160.28		ENSG00000071539	TRIP13	18.4431	17.8287	137.141	57.8041		ENSG00000071889	FAM3A	22.5919	165.233	51.689	79.8379		ENSG00000176953	NFATC2IP	52.8005	111.245	283.422	149.156
	ENSG00000071127	WDR1	249.209	18.6456	3.30593	90.387		ENSG00000071553	ATP6AP1	107.815	99.3201	39.2913	82.1422		ENSG00000071894	CPSF1	121.529	41.4098	75.5731	79.5038		ENSG00000163191	S100A11	280.405	99.6923	66.3839	148.827
	ENSG00000071189	SNX13	18.1475	3.99475	23.894	15.3454		ENSG00000071564	TCF3	62.0147	60.1897	39.2839	53.8295		ENSG00000071967	CYBRD1	59.6982	42.8594	56.0087	52.8554		ENSG00000185900	POMK	5.2674	432.821	7.84082	148.643
	ENSG00000071205	ARHGAP10	2.89614	23.8173	14.7088	13.8074		ENSG00000071575	TRIB2	12.3779	12.7163	134.578	53.2242		ENSG00000071994	PDCD2	51.5598	148.878	26.4847	75.641		ENSG00000143612	C1orf43	407.784	24.9795	10.9775	147.914
	ENSG00000071242	RPS6KA2	23.0017	17.5167	22.0289	20.8491		ENSG00000071626	DAZAP1	110.413	131.417	29.9743	90.6016		ENSG00000072042	RDH11	73.9809	33.3095	158.251	88.5137		ENSG00000092068	SLC7A8	2.8128	414.863	25.8165	147.831
	ENSG00000071243	ING3	15.0389	22.5978	174.038	70.5583		ENSG00000071655	MBD3	39.0216	39.0149	101.628	59.8882		ENSG00000072062	PRKACA	60.0474	122.308	11.4572	64.6042		ENSG00000105364	MRPL4	96.788	276.202	70.2767	147.755
	ENSG00000071246	VASH1	22.4593	172.348	47.071	80.6259		ENSG00000071794	HLTF	39.5651	39.5279	66.2994	48.4641		ENSG00000072071	ADGRL1	23.3741	66.9256	22.1242	37.4746		ENSG00000005844	ITGAL	216.643	203.258	22.964	147.622
	ENSG00000071462	BUD23	168.561	48.9101	37.2975	84.9228		ENSG00000071859	FAM50A	141.963	142.605	50.0522	111.54		ENSG00000072110	ACTN1	157.045	55.4667	28.288	80.2666		ENSG00000181789	COPG1	113.704	87.272	241.054	147.343
	ENSG00000071537	SEL1L	46.5548	37.6791	110.948	65.0606		ENSG00000071889	FAM3A	28.5696	33.1914	76.1631	45.9747		ENSG00000072121	ZFYVE26	14.9168	71.72	30.6636	39.1002		ENSG00000100599	RIN3	37.0929	196.822	206.912	146.942
	ENSG00000071539	TRIP13	39.6744	110.687	95.6464	82.0024		ENSG00000071894	CPSF1	109.18	109.007	58.2169	92.1348		ENSG00000072135	PTPN18	26.4731	54.0509	4.83156	28.4518		ENSG00000165119	HNRNPK	428.52	7.28385	4.8679	146.891
	ENSG00000071553	ATP6AP1	109.254	91.4733	25.2991	75.3423		ENSG00000071967	CYBRD1	62.4058	65.8715	26.1882	51.4885		ENSG00000072274	TFRC	33.989	24.3295	5.76168	21.3601		ENSG00000197253	TPSB2	285.216	26.4371	128.472	146.708
	ENSG00000071564	TCF3	103.582	24.8689	241.332	123.261		ENSG00000071994	PDCD2	48.9915	46.4983	160.405	85.2983		ENSG00000072310	SREBF1	31.7403	177.462	12.4882	73.8968		ENSG00000106560	GIMAP2	10.8049	418.37	10.827	146.667
	ENSG00000071575	TRIB2	25.1372	248.475	46.1952	106.602		ENSG00000072042	RDH11	72.3458	73.6271	12.8092	52.9274		ENSG00000072364	AFF4	6.63589	14.055	1.3411	7.34401		ENSG00000101182	PSMA7	306.949	23.5919	108.74	146.427
	ENSG00000071626	DAZAP1	184.735	50.8065	66.0317	100.524		ENSG00000072062	PRKACA	47.6275	52.2858	25.6283	41.8472		ENSG00000072401	UBE2D1	6.16371	17.7971	66.4857	30.1488		ENSG00000171940	ZNF217	16.0708	53.981	369.024	146.358
	ENSG00000071655	MBD3	52.5825	68.8736	155.749	92.4018		ENSG00000072071	ADGRL1	26.7052	23.112	30.8928	26.9033		ENSG00000072415	PALS1	11.8929	33.7693	195.853	80.5052		ENSG00000104231	ZFAND1	33.1505	322.193	83.5928	146.312
	ENSG00000071794	HLTF	67.1232	159.778	38.5812	88.494		ENSG00000072110	ACTN1	171.45	156.198	24.2462	117.298		ENSG00000072422	RHOBTB1	2.58308	36.1964	32.1531	23.6442		ENSG00000105374	NKG7	286.537	78.7788	72.4077	145.908
	ENSG00000071859	FAM50A	151.599	37.5389	126.295	105.144		ENSG00000072121	ZFYVE26	13.6678	13.1114	7.14952	11.3096		ENSG00000072501	SMC1A	73.2519	6.07845	36.3558	38.562		ENSG00000125869	LAMP5	161.55	272.598	2.73138	145.626
	ENSG00000071889	FAM3A	47.0502	131.384	56.0223	78.1522		ENSG00000072135	PTPN18	20.5562	21.4869	8.30895	16.784		ENSG00000072506	HSD17B10	175.82	8.31331	34.914	73.0158		ENSG00000106462	EZH2	22.2722	9.48701	404.127	145.295
	ENSG00000071894	CPSF1	135.261	55.959	77.078	89.4328		ENSG00000072274	TFRC	29.8755	29.7778	13.1314	24.2616		ENSG00000072518	MARK2	26.8947	11.2646	11.3899	16.5164		ENSG00000167283	ATP5MG	160.873	3.5708	270.955	145.133
	ENSG00000071967	CYBRD1	51.4957	82.3769	86.1479	73.3402		ENSG00000072310	SREBF1	25.8866	23.2894	1.6904	16.9555		ENSG00000072571	HMMR	37.3015	65.8529	69.5964	57.5836		ENSG00000164548	TRA2A	90.133	338.174	7.03908	145.115
	ENSG00000071994	PDCD2	82.3567	85.2147	66.8924	78.1546		ENSG00000072364	AFF4	6.08526	7.14314	47.6993	20.3092		ENSG00000072736	NFATC3	34.4444	187.147	84.4834	102.025		ENSG00000177971	IMP3	41.7468	391.554	1.71302	145.005
	ENSG00000072042	RDH11	81.8855	61.699	41.6995	61.7613		ENSG00000072401	UBE2D1	7.23155	8.29167	166.619	60.7142		ENSG00000072756	TRNT1	12.1359	31.1771	28.8058	24.0396		ENSG00000164941	INTS8	23.5171	393.069	17.8555	144.814
	ENSG00000072062	PRKACA	62.8632	42.994	216.456	107.438		ENSG00000072415	PALS1	13.1726	12.7041	27.7964	17.891		ENSG00000072778	ACADVL	71.8481	34.0993	63.4409	56.4628		ENSG00000111880	RNGTT	9.71937	196.505	225.426	143.883
	ENSG00000072071	ADGRL1	40.4967	208.586	13.9304	87.6711		ENSG00000072422	RHOBTB1	1.29382	1.80129	41.1577	14.7509		ENSG00000072786	STK10	84.5524	36.0023	17.1291	45.8946		ENSG00000140264	SERF2	413.474	6.95258	10.9073	143.778
	ENSG00000072110	ACTN1	238.379	16.2186	28.457	94.3514		ENSG00000072501	SMC1A	66.8332	69.2269	31.1532	55.7378		ENSG00000072803	FBXW11	27.4293	11.6136	37.9888	25.6773		ENSG00000123143	PKN1	336.514	33.1699	61.6266	143.77
	ENSG00000072121	ZFYVE26	13.9737	27.8544	64.9723	35.6001		ENSG00000072506	HSD17B10	170.996	161.702	12.9259	115.208		ENSG00000072818	ACAP1	59.291	66.9246	1.8505	42.6887		ENSG00000143933	CALM2	382.333	9.55014	39.3888	143.757
	ENSG00000072135	PTPN18	31.5977	68.7785	43.6554	48.0105		ENSG00000072518	MARK2	27.0432	30.6128	51.958	36.538		ENSG00000072832	CRMP1	1.25685	76.781	53.584	43.8739		ENSG00000117519	CNN3	3.48164	418.259	9.38038	143.707
	ENSG00000072274	TFRC	65.5259	43.597	10.5189	39.8806		ENSG00000072571	HMMR	39.0594	40.5159	85.4952	55.0235		ENSG00000072849	DERL2	18.6427	29.8858	29.0746	25.8677		ENSG00000106803	SEC61B	113.529	43.7151	273.693	143.646
	ENSG00000072310	SREBF1	51.6818	10.9229	11.0554	24.5533		ENSG00000072736	NFATC3	34.7124	35.4714	26.8571	32.347		ENSG00000072864	NDE1	44.3103	53.5969	19.5178	39.1417		ENSG00000172270	BSG	313.962	51.8134	64.7599	143.512
	ENSG00000072364	AFF4	9.32247	10.3848	15.0079	11.5717		ENSG00000072756	TRNT1	13.7709	13.8373	52.677	26.7617		ENSG00000072952	IRAG1	2.5473	18.6488	72.436	31.2107		ENSG00000130429	ARPC1B	412.115	15.6033	2.67285	143.464
	ENSG00000072401	UBE2D1	11.3935	14.5205	2.86971	9.59455		ENSG00000072778	ACADVL	49.1337	51.3203	15.111	38.5217		ENSG00000072954	TMEM38A	47.9073	35.5747	28.4851	37.3224		ENSG00000104660	LEPROTL1	34.7558	310.433	84.1327	143.107
	ENSG00000072415	PALS1	13.8023	3.22136	116.551	44.5249		ENSG00000072786	STK10	81.6361	84.8823	33.0592	66.5259		ENSG00000072958	AP1M1	52.3956	1.21262	106.488	53.3654		ENSG00000100319	ZMAT5	32.365	29.227	366.855	142.816
	ENSG00000072422	RHOBTB1	3.11568	116.533	229.046	116.231		ENSG00000072803	FBXW11	25.5023	26.7864	1.57513	17.9546		ENSG00000073008	PVR	23.9886	54.6929	25.0737	34.5851		ENSG00000102144	PGK1	289.666	14.8379	122.672	142.392
	ENSG00000072501	SMC1A	116.536	235.495	36.1863	129.406		ENSG00000072818	ACAP1	55.3171	52.8373	50.8681	53.0075		ENSG00000073050	XRCC1	73.3744	44.4893	7.16762	41.6771		ENSG00000104852	SNRNP70	198.585	223.305	4.86627	142.252
	ENSG00000072506	HSD17B10	243.712	38.2692	46.4158	109.466		ENSG00000072849	DERL2	15.7706	14.998	24.5458	18.4382		ENSG00000073060	SCARB1	27.3155	18.2039	2.33268	15.9507		ENSG00000116754	SRSF11	378.833	1.76083	45.6467	142.08
	ENSG00000072518	MARK2	35.8629	49.1136	1.31068	28.7624		ENSG00000072864	NDE1	36.5035	36.6801	18.7807	30.6548		ENSG00000073111	MCM2	104.015	68.4779	11.3136	61.2687		ENSG00000131042	LILRB2	1.56337	230.508	193.923	141.998
	ENSG00000072571	HMMR	47.9315	1.52668	43.2588	30.9057		ENSG00000072952	IRAG1	1.78255	1.64045	64.5686	22.6639		ENSG00000073169	SELENOO	19.9438	32.591	10.8527	21.1292		ENSG00000105323	HNRNPUL1	350.612	71.2419	3.73346	141.862
	ENSG00000072657	TRHDE	1.10131	1.5097	21.5643	8.05842		ENSG00000072954	TMEM38A	49.9004	52.29	23.3756	41.8554		ENSG00000073331	ALPK1	7.35529	102.829	131.545	80.5765		ENSG00000160888	IER2	129.19	284.8	11.5494	141.847
	ENSG00000072736	NFATC3	43.9169	45.0765	75.7944	54.9293		ENSG00000072958	AP1M1	26.2927	39.3472	80.1195	48.5865		ENSG00000073350	LLGL2	3.52398	24.9336	47.1798	25.2124		ENSG00000146282	RARS2	14.2707	355.719	54.6539	141.548
	ENSG00000072756	TRNT1	21.942	23.8396	90.3429	45.3748		ENSG00000073008	PVR	19.1145	19.4001	19.8673	19.4606		ENSG00000073417	PDE8A	14.3996	6.807	9.39891	10.2018		ENSG00000143622	RIT1	31.5016	47.0326	345.697	141.411
	ENSG00000072778	ACADVL	80.7704	77.363	36.725	64.9528		ENSG00000073050	XRCC1	71.0459	67.8761	8.10926	49.0104		ENSG00000073536	NLE1	9.12087	3.5593	20.9815	11.2205		ENSG00000171522	PTGER4	24.7277	364.765	34.2989	141.264
	ENSG00000072786	STK10	89.5377	93.571	53.1049	78.7379		ENSG00000073060	SCARB1	23.247	25.0241	2.69308	16.9881		ENSG00000073578	SDHA	131.787	11.5453	2.78488	48.7059		ENSG00000198258	UBL5	359.017	61.6092	3.13004	141.252
	ENSG00000072803	FBXW11	37.1296	35.2359	22.8621	31.7425		ENSG00000073111	MCM2	86.539	84.0033	10.9329	60.4917		ENSG00000073584	SMARCE1	53.9122	9.47218	1.97528	21.7866		ENSG00000088298	EDEM2	56.8598	327.567	38.9731	141.133
	ENSG00000072818	ACAP1	50.8201	51.1796	43.4185	48.4727		ENSG00000073169	SELENOO	21.8337	19.4641	7.81463	16.3708		ENSG00000073605	GSDMB	11.8031	127.889	24.9291	54.8737		ENSG00000105516	DBP	42.7183	24.8	355.862	141.127
	ENSG00000072849	DERL2	19.8545	21.0028	1.58579	14.1477		ENSG00000073331	ALPK1	7.99622	7.77798	132.05	49.2747		ENSG00000073614	KDM5A	23.1728	68.647	18.436	36.7519		ENSG00000126226	PCID2	54.1059	17.3834	351.777	141.089
	ENSG00000072864	NDE1	44.0038	41.2725	47.5002	44.2588		ENSG00000073350	LLGL2	2.51995	4.18966	56.4772	21.0623		ENSG00000073670	ADAM11	4.06624	11.774	17.0489	10.9631		ENSG00000102172	SMS	291.229	27.531	104.217	140.992
	ENSG00000072952	IRAG1	1.95098	1.92115	85.886	29.9194		ENSG00000073417	PDE8A	11.9994	12.292	11.4837	11.925		ENSG00000073737	DHRS9	1.65488	19.1594	5.86337	8.89254		ENSG00000161681	SHANK1	6.59311	413.175	3.07628	140.948
	ENSG00000072954	TMEM38A	48.2746	47.842	41.3826	45.8331		ENSG00000073536	NLE1	7.03648	8.66224	19.8734	11.8574		ENSG00000073792	IGF2BP2	23.392	2.50811	14.3956	13.4319		ENSG00000237522	NONOP2	5.99976	413.336	3.45082	140.929
	ENSG00000072958	AP1M1	83.1839	60.8992	97.6374	80.5735		ENSG00000073578	SDHA	118.34	134.251	3.62633	85.4056		ENSG00000073803	MAP3K13	22.7468	23.3478	32.1232	26.0726		ENSG00000204272	NBDY	3.33178	68.0285	351.345	140.902
	ENSG00000073008	PVR	40.8561	42.0275	37.3705	40.0847		ENSG00000073584	SMARCE1	54.4455	54.5513	1.21536	36.7374		ENSG00000073849	ST6GAL1	14.8412	19.1138	22.1772	18.7107		ENSG00000168003	SLC3A2	154.336	234.774	33.435	140.848
	ENSG00000073050	XRCC1	96.3939	98.9202	145.626	113.647		ENSG00000073605	GSDMB	10.3809	12.4987	24.0377	15.6391		ENSG00000073910	FRY	10.27	14.4779	97.3731	40.707		ENSG00000128524	ATP6V1F	383.585	25.6884	13.2113	140.828
	ENSG00000073060	SCARB1	43.7424	39.0447	18.2978	33.695		ENSG00000073614	KDM5A	23.1883	21.5752	19.885	21.5495		ENSG00000073921	PICALM	15.6918	4.49748	83.6546	34.6147		ENSG00000123975	CKS2	196.913	223.567	1.90044	140.794
	ENSG00000073111	MCM2	145.662	143.812	7.56678	99.0137		ENSG00000073670	ADAM11	5.38263	3.01423	13.847	7.41462		ENSG00000073969	NSF	34.3467	20.3348	14.8093	23.1636		ENSG00000105352	CEACAM4	6.53537	2.33389	413.374	140.748
	ENSG00000073169	SELENOO	16.8159	16.1562	7.04394	13.3387		ENSG00000073737	DHRS9	1.37741	1.19334	5.75088	2.77388		ENSG00000074054	CLASP1	22.9631	32.964	33.4796	29.8022		ENSG00000062582	MRPS24	163.397	58.4122	199.997	140.602
	ENSG00000073331	ALPK1	6.7345	8.18152	16.1837	10.3666		ENSG00000073792	IGF2BP2	21.9682	24.9708	15.6472	20.8621		ENSG00000074071	MRPS34	77.5011	22.8311	15.2767	38.5363		ENSG00000105327	BBC3	20.3908	128.614	272.663	140.556
	ENSG00000073350	LLGL2	4.21211	3.90671	17.1978	8.43889		ENSG00000073803	MAP3K13	23.7414	22.5305	32.4997	26.2572		ENSG00000074201	CLNS1A	76.0405	92.6649	63.6622	77.4559		ENSG00000162961	DPY30	73.9906	2.5018	344.912	140.468
	ENSG00000073417	PDE8A	16.6369	16.9758	147.55	60.3877		ENSG00000073849	ST6GAL1	14.8343	14.0499	23.9235	17.6026		ENSG00000074266	EED	13.6061	60.3921	42.3172	38.7718		ENSG00000125977	EIF2S2	176.744	173.164	71.0469	140.318
	ENSG00000073536	NLE1	17.3885	17.8373	63.5658	32.9305		ENSG00000073910	FRY	6.26678	7.02236	79.5446	30.9446		ENSG00000074319	TSG101	35.7487	16.3833	26.6257	26.2526		ENSG00000198756	COLGALT2	2.48703	393	25.3295	140.272
	ENSG00000073578	SDHA	139.495	148.62	7.06042	98.3918		ENSG00000073921	PICALM	15.1038	15.8385	55.6242	28.8555		ENSG00000074356	NCBP3	20.6533	40.3769	14.2899	25.1067		ENSG00000128185	DGCR6L	46.6622	5.40815	368.665	140.245
	ENSG00000073584	SMARCE1	61.5832	63.8717	24.6157	50.0235		ENSG00000073969	NSF	28.4573	31.1133	13.8892	24.4866		ENSG00000074370	ATP2A3	62.2167	16.5211	3.67139	27.4697		ENSG00000204439	C6orf47	16.8117	130.55	272.572	139.978
	ENSG00000073605	GSDMB	7.85833	8.02434	3.97123	6.61797		ENSG00000074054	CLASP1	23.519	25.1552	1.23583	16.6367		ENSG00000074416	MGLL	42.8243	70.3138	57.4327	56.8569		ENSG00000143761	ARF1	338.327	70.5797	9.87063	139.592
	ENSG00000073614	KDM5A	24.4983	24.9484	2.77967	17.4088		ENSG00000074071	MRPS34	85.6628	78.8249	35.9297	66.8058		ENSG00000074582	BCS1L	22.1612	34.3278	52.3732	36.2874		ENSG00000121966	CXCR4	362.123	51.5246	4.52424	139.391
	ENSG00000073670	ADAM11	5.96332	3.76036	37.7729	15.8322		ENSG00000074201	CLNS1A	73.6695	73.293	19.2094	55.3906		ENSG00000074603	DPP8	12.8596	24.238	3.18346	13.427		ENSG00000171530	TBCA	350.147	53.1893	14.5527	139.296
	ENSG00000073737	DHRS9	3.27117	2.54523	29.1144	11.6436		ENSG00000074266	EED	12.1805	14.6426	51.3561	26.0597		ENSG00000074621	SLC24A1	3.88155	12.1565	16.0864	10.7081		ENSG00000105607	GCDH	23.3015	63.2095	331.175	139.229
	ENSG00000073792	IGF2BP2	33.8022	39.9981	27.5294	33.7766		ENSG00000074319	TSG101	35.471	1.84716	38.1905	25.1696		ENSG00000074695	LMAN1	55.6028	3.14366	1618.9	559.217		ENSG00000237973	MTCO1P12	380.282	1.55629	35.4988	139.112
	ENSG00000073803	MAP3K13	30.2837	31.1119	4.93056	22.1087		ENSG00000074356	NCBP3	19.2766	36.5952	22.2231	26.0316		ENSG00000074696	HACD3	51.2379	53.2684	108.998	71.168		ENSG00000160255	ITGB2	411.005	4.02318	2.30265	139.11
	ENSG00000073849	ST6GAL1	27.7022	26.7617	25.0161	26.4933		ENSG00000074370	ATP2A3	57.5959	20.3052	15.0455	30.9822		ENSG00000074706	IPCEF1	4.88126	53.0825	11.5679	23.1772		ENSG00000101236	RNF24	45.2855	262.783	108.997	139.022
	ENSG00000073910	FRY	6.47117	6.75192	50.65	21.291		ENSG00000074416	MGLL	36.3659	44.952	5.22446	28.8474		ENSG00000074755	ZZEF1	22.3725	2.68844	23.2266	16.0958		ENSG00000116288	PARK7	256.451	155.863	4.02601	138.78
	ENSG00000073921	PICALM	17.6016	16.3702	30.1919	21.3879		ENSG00000074582	BCS1L	18.4334	36.9235	57.9188	37.7585		ENSG00000074800	ENO1	1667.02	15.3473	10.1845	564.185		ENSG00000162511	LAPTM5	380.226	2.66759	33.4409	138.778
	ENSG00000073969	NSF	50.1805	52.7068	136.771	79.8861		ENSG00000074603	DPP8	14.4158	22.0612	54.2033	30.2268		ENSG00000074842	MYDGF	98.9252	1659.47	1.32606	586.573		ENSG00000159377	PSMB4	366.513	27.9765	21.287	138.592
	ENSG00000074054	CLASP1	29.6855	31.2156	128.052	62.9843		ENSG00000074621	SLC24A1	4.40828	15.2041	3.5743	7.72889		ENSG00000074855	ANO8	6.44465	116.091	18.872	47.1359		ENSG00000215021	PHB2	394.115	12.317	9.19024	138.541
	ENSG00000074071	MRPS34	141.624	120.236	25.229	95.6965		ENSG00000074695	LMAN1	54.5652	3.98641	18.2058	25.5858		ENSG00000074935	TUBE1	20.746	8.28815	5.44371	11.4926		ENSG00000142065	ZFP14	4.97767	51.2767	359.055	138.437
	ENSG00000074201	CLNS1A	96.2335	116.778	1.08589	71.3657		ENSG00000074696	HACD3	50.3809	56.1469	1294.47	466.999		ENSG00000074964	ARHGEF10L	8.45492	20.2045	46.6039	25.0878		ENSG00000130024	PHF10	81.56	323.101	8.19983	137.62
	ENSG00000074266	EED	24.9405	25.3845	53.375	34.5667		ENSG00000074706	IPCEF1	3.74692	54.8512	89.4983	49.3655		ENSG00000075073	TACR2	3.04715	8.92575	30.4195	14.1308		ENSG00000105618	PRPF31	103.097	250.787	58.6555	137.513
	ENSG00000074319	TSG101	49.0522	56.3896	22.1009	42.5142		ENSG00000074755	ZZEF1	17.4127	3.93141	8.06668	9.80359		ENSG00000075089	ACTR6	13.1522	2.77627	19.5507	11.8264		ENSG00000177706	FAM20C	13.9743	40.7191	357.76	137.485
	ENSG00000074356	NCBP3	22.656	22.2	73.2328	39.363		ENSG00000074800	ENO1	1295.14	16.7792	18.7787	443.565		ENSG00000075131	TIPIN	8.6384	11.863	19.0001	13.1672		ENSG00000103495	MAZ	396.598	12.9357	2.89918	137.478
	ENSG00000074370	ATP2A3	87.7049	76.7802	49.1256	71.2036		ENSG00000074842	MYDGF	100.918	1291.31	11.3322	467.854		ENSG00000075142	SRI	56.1718	7.57739	11.4138	25.0543		ENSG00000143870	PDIA6	340.403	21.9315	49.9307	137.422
	ENSG00000074416	MGLL	47.6666	47.1206	27.2374	40.6749		ENSG00000074855	ANO8	9.17687	85.3343	1.35504	31.9554		ENSG00000075151	EIF4G3	32.9222	51.3688	90.4349	58.242		ENSG00000143674	MAP3K21	4.28486	342.665	65.0649	137.338
	ENSG00000074582	BCS1L	33.0105	34.9047	21.9224	29.9459		ENSG00000074935	TUBE1	16.5012	7.88938	2.9545	9.11504		ENSG00000075188	NUP37	16.1905	30.4292	40.9425	29.1874		ENSG00000159200	RCAN1	24.2328	363.92	23.505	137.219
	ENSG00000074603	DPP8	22.2351	22.7145	4.81923	16.5896		ENSG00000074964	ARHGEF10L	11.3882	18.3651	16.1181	15.2905		ENSG00000075218	GTSE1	17.0144	17.5671	75.0703	36.5506		ENSG00000136986	DERL1	44.8601	357.672	8.68794	137.073
	ENSG00000074621	SLC24A1	5.24392	4.85389	77.1963	29.098		ENSG00000074966	TXK	1.13343	9.75001	7.77908	6.22084		ENSG00000075234	TTC38	8.2705	19.7527	41.8131	23.2788		ENSG00000104164	BLOC1S6	35.2437	44.3369	331.397	136.992
	ENSG00000074695	LMAN1	75.7666	77.9638	70.1577	74.6294		ENSG00000075073	TACR2	3.35021	2.67324	40.7235	15.5823		ENSG00000075239	ACAT1	85.5999	11.6944	26.9337	41.4094		ENSG00000188186	LAMTOR4	312.418	8.41872	89.9664	136.934
	ENSG00000074696	HACD3	69.5057	72.216	3.65433	48.4587		ENSG00000075089	ACTR6	13.1607	13.9581	32.8625	19.9938		ENSG00000075240	GRAMD4	37.6282	102.608	2.75225	47.6627		ENSG00000198830	HMGN2	388.226	13.547	6.55817	136.11
	ENSG00000074706	IPCEF1	3.12025	3.78256	21.432	9.44495		ENSG00000075131	TIPIN	5.65103	7.99033	18.3128	10.6514		ENSG00000075292	ZNF638	87.0812	36.2839	6.36963	43.2449		ENSG00000160752	FDPS	295.02	109.098	4.04206	136.053
	ENSG00000074755	ZZEF1	23.5514	22.4338	1546.26	530.748		ENSG00000075142	SRI	44.6584	44.4475	18.4171	35.841		ENSG00000075303	SLC25A40	40.8424	80.243	15.8899	45.6585		ENSG00000196878	LAMB3	2.62889	83.6081	321.595	135.944
	ENSG00000074800	ENO1	1544.15	1571.91	155.164	1090.41		ENSG00000075151	EIF4G3	33.4577	36.2275	10.8602	26.8484		ENSG00000075336	TIMM21	29.8405	46.0663	47.6063	41.171		ENSG00000131779	PEX11B	32.4408	70.7227	304.452	135.872
	ENSG00000074842	MYDGF	175.623	154.039	10.5543	113.405		ENSG00000075188	NUP37	18.3944	19.1589	93.6496	43.7343		ENSG00000075391	RASAL2	2.70636	26.9803	191.269	73.6519		ENSG00000128340	RAC2	350.912	49.7303	6.80207	135.815
	ENSG00000074855	ANO8	11.5408	8.80009	44.5045	21.6151		ENSG00000075218	GTSE1	18.4385	18.6019	33.0391	23.3599		ENSG00000075399	VPS9D1	7.00195	2.52428	32.4806	14.0023		ENSG00000172893	DHCR7	82.6048	37.6079	287.095	135.769
	ENSG00000074935	TUBE1	46.478	43.3167	7.12036	32.305		ENSG00000075234	TTC38	9.26621	8.9785	92.9766	37.0738		ENSG00000075407	ZNF37A	17.8368	5.68399	31.9168	18.4792		ENSG00000130726	TRIM28	283.289	104.776	19.0598	135.708
	ENSG00000074964	ARHGEF10L	7.92599	7.60381	1.91614	5.81532		ENSG00000075239	ACAT1	89.3531	98.2575	48.0453	78.5519		ENSG00000075413	MARK3	46.9159	17.4512	24.0486	29.4719		ENSG00000105568	PPP2R1A	128.13	19.5106	259.054	135.565
	ENSG00000075073	TACR2	2.11571	1.4355	23.4145	8.98857		ENSG00000075240	GRAMD4	34.852	34.8317	22.9312	30.8716		ENSG00000075415	SLC25A3	175.29	49.3588	36.7547	87.1344		ENSG00000198356	GET3	61.6431	2.54618	341.719	135.303
	ENSG00000075089	ACTR6	23.1955	23.023	16.5146	20.911		ENSG00000075292	ZNF638	130.317	93.0315	3.15267	75.5005		ENSG00000075420	FNDC3B	26.7009	174.31	1897.5	699.503		ENSG00000214940	NPIPA8	7.75486	390.701	6.59652	135.017
	ENSG00000075131	TIPIN	16.7158	14.4766	80.9327	37.3751		ENSG00000075303	SLC25A40	44.9292	46.6011	5.49711	32.3425		ENSG00000075426	FOSL2	30.6573	27.8028	20.4381	26.2994		ENSG00000197043	ANXA6	309.383	74.1627	21.3919	134.979
	ENSG00000075142	SRI	81.8542	78.2587	44.0105	68.0411		ENSG00000075336	TIMM21	19.0878	23.1796	18.4352	20.2342		ENSG00000075539	FRYL	19.2041	30.0966	35.0702	28.1236		ENSG00000214941	ZSWIM7	19.1248	2.27074	383.381	134.925
	ENSG00000075151	EIF4G3	46.2332	47.3379	35.448	43.0064		ENSG00000075391	RASAL2	2.706	2.6692	48.3104	17.8952		ENSG00000075568	TMEM131	38.8372	19.1286	16.9414	24.969		ENSG00000030582	GRN	329.532	46.477	28.2534	134.754
	ENSG00000075188	NUP37	31.2941	33.5428	22.3773	29.0714		ENSG00000075399	VPS9D1	5.59599	4.60411	193.43	67.8768		ENSG00000075624	ACTB	1942.96	33.2541	298.589	758.267		ENSG00000136159	NUDT15	10.3855	320.845	72.917	134.716
	ENSG00000075218	GTSE1	22.8514	25.4712	11.9955	20.106		ENSG00000075407	ZNF37A	17.9992	16.503	25.169	19.8904		ENSG00000075651	PLD1	20.5587	1992.28	8.64078	673.827		ENSG00000164603	BMT2	10.6728	99.8176	293.447	134.646
	ENSG00000075234	TTC38	14.6895	12.7764	150.919	59.4616		ENSG00000075413	MARK3	47.873	48.425	24.9779	40.4253		ENSG00000075702	WDR62	38.0303	20.9611	12.8174	23.9363		ENSG00000210135	MT-TN	338.628	61.4546	3.63491	134.573
	ENSG00000075239	ACAT1	149.72	152.166	44.6356	115.507		ENSG00000075415	SLC25A3	179.053	173.084	23.2281	125.122		ENSG00000075711	DLG1	19.1842	35.3005	39.2869	31.2572		ENSG00000163389	POGLUT1	21.2644	379.97	2.22131	134.485
	ENSG00000075240	GRAMD4	45.7904	44.9568	96.2138	62.3203		ENSG00000075420	FNDC3B	26.1868	24.2515	36.6967	29.045		ENSG00000075785	RAB7A	325.793	17.4694	86.7224	143.328		ENSG00000116171	SCP2	90.8635	44.008	268.405	134.425
	ENSG00000075292	ZNF638	109.351	102.561	79.0601	96.9907		ENSG00000075426	FOSL2	26.3895	25.8459	1793.31	615.182		ENSG00000075790	BCAP29	9.78018	315.686	1.85142	109.106		ENSG00000143499	SMYD2	5.54372	137.514	259.905	134.321
	ENSG00000075303	SLC25A40	81.5976	79.5915	32.9253	64.7048		ENSG00000075539	FRYL	13.4905	11.6936	18.5322	14.5721		ENSG00000075826	SEC31B	20.5845	12.3044	84.5224	39.1371		ENSG00000178035	IMPDH2	331.224	4.04143	67.5859	134.284
	ENSG00000075336	TIMM21	32.7651	31.8441	2.96196	22.5237		ENSG00000075568	TMEM131	37.399	39.1949	39.0211	38.5383		ENSG00000075856	SART3	41.8053	15.1813	6.02461	21.0037		ENSG00000149923	PPP4C	221.101	48.1476	132.988	134.079
	ENSG00000075391	RASAL2	3.71593	3.32177	6.45637	4.49802		ENSG00000075618	FSCN1	1.14218	1757.22	21.9176	593.427		ENSG00000075884	ARHGAP15	88.2292	37.418	31.9131	52.5201		ENSG00000172053	QARS1	346.068	7.86896	48.1335	134.023
	ENSG00000075399	VPS9D1	6.32778	6.92553	27.2706	13.508		ENSG00000075624	ACTB	1797.95	20.8537	321.148	713.318		ENSG00000075886	TUBA3D	2.84641	89.7257	94.8944	62.4889		ENSG00000120265	PCMT1	118.355	9.17951	274.428	133.987
	ENSG00000075407	ZNF37A	26.8619	27.8329	64.5427	39.7458		ENSG00000075651	PLD1	18.278	36.6936	8.88317	21.2849		ENSG00000075914	EXOSC7	70.7387	2.8972	68.8915	47.5091		ENSG00000198740	ZNF652	5.27156	22.5049	373.497	133.758
	ENSG00000075413	MARK3	65.0073	64.29	202.543	110.613		ENSG00000075702	WDR62	43.6077	21.1359	16.3519	27.0319		ENSG00000075945	KIFAP3	6.86286	85.2514	11.3695	34.4946		ENSG00000117523	PRRC2C	194.82	41.7776	164.586	133.728
	ENSG00000075415	SLC25A3	212.642	199.127	35.6857	149.151		ENSG00000075711	DLG1	19.5743	303.964	35.6267	119.722		ENSG00000075975	MKRN2	28.0181	6.97066	58.0468	31.0119		ENSG00000159202	UBE2Z	42.771	4.24677	353.389	133.469
	ENSG00000075420	FNDC3B	36.223	38.506	41.732	38.8203		ENSG00000075785	RAB7A	295.093	12.02	91.8979	133.003		ENSG00000076003	MCM6	90.8532	25.8653	48.6784	55.1323		ENSG00000166598	HSP90B1	346.489	50.0422	3.39154	133.308
	ENSG00000075426	FOSL2	41.6752	40.6235	17.4252	33.2413		ENSG00000075790	BCAP29	7.8141	16.6016	2.91173	9.10915		ENSG00000076043	REXO2	75.5603	88.1378	48.5761	70.7581		ENSG00000122481	RWDD3	9.04547	13.3683	377.311	133.242
	ENSG00000075539	FRYL	16.0113	16.3001	42.8469	25.0528		ENSG00000075826	SEC31B	16.9004	36.9223	72.5104	42.111		ENSG00000076053	RBM7	13.28	73.9733	15.2588	34.1707		ENSG00000142507	PSMB6	117.394	37.8532	243.739	132.996
	ENSG00000075568	TMEM131	44.3397	45.6405	2873.39	987.79		ENSG00000075856	SART3	34.7564	95.946	7.1531	45.9519		ENSG00000076108	BAZ2A	49.8715	13.7671	16.4626	26.7004		ENSG00000164944	VIRMA	20.6084	5.58269	372.55	132.914
	ENSG00000075618	FSCN1	1.01992	1.0248	22.502	8.18224		ENSG00000075884	ARHGAP15	93.8951	3.01331	27.5271	41.4785		ENSG00000076201	PTPN23	44.1856	49.7891	1.861	31.9452		ENSG00000208036	MIR106B	7.85827	378.168	12.065	132.697
	ENSG00000075624	ACTB	2884.28	2849.78	51.5532	1928.54		ENSG00000075886	TUBA3D	3.30194	74.1389	80.8146	52.7518		ENSG00000076242	MLH1	45.2739	38.9307	77.1116	53.772		ENSG00000089639	GMIP	30.8527	157.941	208.686	132.494
	ENSG00000075651	PLD1	27.9616	30.8925	29.78	29.5447		ENSG00000075914	EXOSC7	72.9829	7.16247	64.8196	48.3216		ENSG00000076248	UNG	14.7661	43.3693	52.014	36.7165		ENSG00000101126	ADNP	32.5792	84.6029	279.32	132.167
	ENSG00000075702	WDR62	49.0118	47.8564	337.115	144.661		ENSG00000075945	KIFAP3	7.48957	27.2381	13.1551	15.9609		ENSG00000076321	KLHL20	16.5172	14.0401	7.82446	12.7939		ENSG00000167325	RRM1	59.1206	276.086	61.1012	132.103
	ENSG00000075711	DLG1	25.7604	29.2797	25.3781	26.8061		ENSG00000075975	MKRN2	27.6439	83.1115	52.9237	54.5597		ENSG00000076382	SPAG5	82.4299	14.8852	4.97213	34.0958		ENSG00000166479	TMX3	31.6892	10.4315	354.184	132.102
	ENSG00000075785	RAB7A	352.151	357.311	17.9586	242.474		ENSG00000076003	MCM6	79.0782	62.2451	41.7611	61.0282		ENSG00000076513	ANKRD13A	45.5537	1.24506	13.9137	20.2375		ENSG00000106400	ZNHIT1	258.319	118.455	17.907	131.56
	ENSG00000075790	BCAP29	18.1229	16.5397	58.9388	31.2005		ENSG00000076043	REXO2	65.1581	12.9903	47.6678	41.9387		ENSG00000076554	TPD52	9.55964	75.5106	11.602	32.2241		ENSG00000057608	GDI2	195.584	3.1819	195.857	131.541
	ENSG00000075826	SEC31B	15.1946	17.6194	150.036	60.9502		ENSG00000076053	RBM7	12.9376	53.1714	11.3551	25.8213		ENSG00000076555	ACACB	7.19969	58.0352	21.1995	28.8115		ENSG00000132341	RAN	187.602	204.553	2.30005	131.485
	ENSG00000075856	SART3	53.5049	57.1286	2.06255	37.5654		ENSG00000076108	BAZ2A	50.8651	39.8315	14.0467	34.9144		ENSG00000076604	TRAF4	15.4785	8.43326	31.6456	18.5191		ENSG00000102096	PIM2	21.9497	267.647	104.744	131.447
	ENSG00000075884	ARHGAP15	143.32	150.851	107.2	133.79		ENSG00000076201	PTPN23	43.7013	45.831	1.36885	30.3004		ENSG00000076641	PAG1	11.4177	3.71319	105.098	40.0764		ENSG00000143437	ARNT	36.1719	34.5994	323.396	131.389
	ENSG00000075886	TUBA3D	1.93769	1.94024	9.69308	4.52367		ENSG00000076242	MLH1	45.6841	10.7698	82.2666	46.2402		ENSG00000076650	GPATCH1	21.2269	18.7302	88.9278	42.9617		ENSG00000110944	IL23A	21.6031	24.3004	348.153	131.352
	ENSG00000075914	EXOSC7	115.839	116.725	42.3778	91.6474		ENSG00000076248	UNG	13.0367	15.5545	51.36	26.6504		ENSG00000076662	ICAM3	19.5906	12.9104	198.744	77.0815		ENSG00000140153	WDR20	10.6687	115.993	266.885	131.182
	ENSG00000075945	KIFAP3	9.20398	8.91451	165.62	61.2461		ENSG00000076321	KLHL20	14.8545	83.7905	8.67014	35.7717		ENSG00000076685	NT5C2	112.8	23.0668	548.548	228.138		ENSG00000136286	MYO1G	297.076	30.6288	65.5833	131.096
	ENSG00000075975	MKRN2	45.1234	44.5938	101.241	63.6527		ENSG00000076382	SPAG5	81.4077	56.7209	3.88229	47.337		ENSG00000076770	MBNL3	5.10867	26.9851	48.8153	26.9697		ENSG00000130303	BST2	334.133	45.3371	13.799	131.09
	ENSG00000076003	MCM6	162.615	167.299	14.7555	114.89		ENSG00000076513	ANKRD13A	53.566	7.899	13.6923	25.0525		ENSG00000076924	XAB2	91.1249	123.773	128.601	114.5		ENSG00000145912	NHP2	153.541	23.3717	216.341	131.084
	ENSG00000076043	REXO2	97.942	91.9278	63.5135	84.4611		ENSG00000076554	TPD52	7.95091	3.9057	11.419	7.75854		ENSG00000076928	ARHGEF1	190.657	3.60225	174.751	123.003		ENSG00000184216	IRAK1	174.465	216.259	2.39244	131.039
	ENSG00000076053	RBM7	12.6451	14.3325	50.5605	25.8461		ENSG00000076555	ACACB	6.72287	11.6417	22.9431	13.7692		ENSG00000076944	STXBP2	535.751	95.7171	69.2687	233.579		ENSG00000131238	PPT1	247.33	2.55481	143.22	131.035
	ENSG00000076108	BAZ2A	63.4916	64.3203	63.3985	63.7368		ENSG00000076604	TRAF4	14.4303	10.8206	25.1242	16.7917		ENSG00000076984	MAP2K7	29.834	187.003	39.2425	85.3599		ENSG00000107262	BAG1	125.095	80.735	187.201	131.01
	ENSG00000076201	PTPN23	57.3342	52.4258	22.8479	44.2026		ENSG00000076641	PAG1	11.7056	22.8448	110.016	48.1889		ENSG00000077044	DGKD	128.732	537.971	68.0063	244.903		ENSG00000166908	PIP4K2C	6.92388	132.618	252.868	130.803
	ENSG00000076242	MLH1	67.7397	67.8077	1.21421	45.5872		ENSG00000076650	GPATCH1	19.2058	24.6927	3.40296	15.7672		ENSG00000077097	TOP2B	166.428	47.6959	8.05528	74.0596		ENSG00000130755	GMFG	335.714	2.45659	54.0252	130.732
	ENSG00000076248	UNG	21.9378	23.5187	20.1031	21.8532		ENSG00000076662	ICAM3	22.779	112.593	86.9447	74.1056		ENSG00000077147	TM9SF3	63.1211	109.99	15.0604	62.7238		ENSG00000115956	PLEK	351.31	3.22475	37.6446	130.726
	ENSG00000076321	KLHL20	18.7495	19.8544	93.7725	44.1255		ENSG00000076685	NT5C2	105.796	2.27086	189.046	99.0378		ENSG00000077150	NFKB2	40.5252	153.4	39.2012	77.7087		ENSG00000180228	PRKRA	53.4271	74.4781	263.023	130.309
	ENSG00000076382	SPAG5	97.2418	100.449	78.1595	91.95		ENSG00000076770	MBNL3	3.60245	84.7698	563.376	217.249		ENSG00000077152	UBE2T	68.2692	66.239	36.4673	56.9918		ENSG00000172594	SMPDL3A	3.4741	29.9932	357.064	130.177
	ENSG00000076513	ANKRD13A	78.4007	80.3351	11.2931	56.6763		ENSG00000076924	XAB2	86.9887	186.381	41.7232	105.031		ENSG00000077157	PPP1R12B	5.79223	37.3009	27.8147	23.636		ENSG00000172340	SUCLG2	43.0004	322.984	24.1624	130.049
	ENSG00000076554	TPD52	13.0925	11.4903	8.41773	11.0002		ENSG00000076928	ARHGEF1	185.03	515.873	110.266	270.39		ENSG00000077232	DNAJC10	18.7676	60.613	121.675	67.0187		ENSG00000161011	SQSTM1	312.232	62.2566	15.342	129.944
	ENSG00000076555	ACACB	6.6571	7.98603	21.7603	12.1345		ENSG00000076944	STXBP2	591.865	41.6278	162.507	265.333		ENSG00000077235	GTF3C1	42.4242	6.34349	2.45333	17.0737		ENSG00000104419	NDRG1	304.279	58.0998	27.2227	129.867
	ENSG00000076604	TRAF4	24.1834	25.0597	21.1887	23.4773		ENSG00000076984	MAP2K7	43.7581	109.185	69.5671	74.1701		ENSG00000077238	IL4R	33.47	17.3524	86.6246	45.8156		ENSG00000280800	-	167.076	194.811	26.419	129.435
	ENSG00000076641	PAG1	21.7973	22.6721	24.9333	23.1342		ENSG00000077044	DGKD	120.247	169.626	37.7802	109.218		ENSG00000077254	USP33	32.4006	36.4495	238.38	102.41		ENSG00000105669	COPE	306.989	49.91	31.3532	129.417
	ENSG00000076650	GPATCH1	23.3245	25.0694	16.9314	21.7751		ENSG00000077097	TOP2B	156.007	75.6298	62.174	97.9369		ENSG00000077312	SNRPA	120.47	36.9914	44.9943	67.4851		ENSG00000143390	RFX5	34.4154	287.575	65.4813	129.157
	ENSG00000076662	ICAM3	17.9138	16.7527	130.612	55.0929		ENSG00000077147	TM9SF3	70.1458	35.0938	5.53939	36.9263		ENSG00000077327	SPAG6	1.30536	36.7299	120.672	52.9025		ENSG00000119203	CPSF3	93.2565	35.8917	258.127	129.092
	ENSG00000076685	NT5C2	125.681	131.545	5.17596	87.4673		ENSG00000077150	NFKB2	33.473	56.964	18.2601	36.2324		ENSG00000077348	EXOSC5	84.8802	128.557	13.5705	75.6693		ENSG00000228474	OST4	316.998	2.7441	66.9376	128.893
	ENSG00000076770	MBNL3	5.30587	4.65938	93.5152	34.4935		ENSG00000077152	UBE2T	57.5152	5.28423	38.6478	33.8158		ENSG00000077380	DYNC1I2	256.282	75.085	35.6246	122.331		ENSG00000103356	EARS2	22.086	334.718	29.869	128.891
	ENSG00000076924	XAB2	96.8435	92.5654	231.553	140.321		ENSG00000077157	PPP1R12B	4.65349	16.6223	37.9521	19.7426		ENSG00000077420	APBB1IP	42.984	255.917	19.9371	106.279		ENSG00000100348	TXN2	81.0181	299.528	5.99307	128.847
	ENSG00000076928	ARHGEF1	242.681	230.765	500.235	324.561		ENSG00000077232	DNAJC10	16.3846	38.3644	31.9066	28.8852		ENSG00000077454	LRCH4	153.253	45.0248	115.102	104.46		ENSG00000233984	RPSAP14	2.79165	20.2835	363.368	128.814
	ENSG00000076944	STXBP2	486.09	476.681	49.5975	337.456		ENSG00000077235	GTF3C1	38.405	32.9363	115.149	62.1635		ENSG00000077458	FAM76B	19.7453	114.929	7.16222	47.2788		ENSG00000143641	GALNT2	83.9044	294.811	7.55052	128.755
	ENSG00000076984	MAP2K7	53.8829	53.0828	124.581	77.1821		ENSG00000077238	IL4R	37.7063	32.151	43.525	37.7941		ENSG00000077463	SIRT6	31.0102	14.7831	21.7618	22.5184		ENSG00000122877	EGR2	1.62809	349.712	34.7713	128.704
	ENSG00000077044	DGKD	132.258	118.24	274.404	174.967		ENSG00000077254	USP33	34.8867	108.988	281.779	141.884		ENSG00000077514	POLD3	21.257	41.5845	12.1536	24.9984		ENSG00000126012	KDM5C	73.8767	125.588	186.613	128.692
	ENSG00000077097	TOP2B	270.64	287.424	86.3147	214.793		ENSG00000077312	SNRPA	111.687	1.53582	39.7149	50.9792		ENSG00000077549	CAPZB	163.034	18.8329	59.5559	80.4743		ENSG00000051128	HOMER3	346.302	14.3098	25.3324	128.648
	ENSG00000077147	TM9SF3	86.9686	89.6175	32.1969	69.5943		ENSG00000077327	SPAG6	2.16881	38.3871	142.417	60.9909		ENSG00000077585	GPR137B	4.27317	143.302	8.44212	52.0057		ENSG00000099290	WASHC2A	31.6672	181.673	172.275	128.538
	ENSG00000077150	NFKB2	32.9729	32.2732	104.855	56.7004		ENSG00000077348	EXOSC5	43.3835	272.856	15.7785	110.673		ENSG00000077684	JADE1	24.7282	3.89907	2.72465	10.4506		ENSG00000105058	FAM32A	178.468	204.137	3.00767	128.538
	ENSG00000077152	UBE2T	100.067	111.176	7.56112	72.9348		ENSG00000077380	DYNC1I2	270.465	44.0039	28.8484	114.439		ENSG00000077713	SLC25A43	14.6682	23.1249	9.40644	15.7332		ENSG00000168538	TRAPPC11	24.5448	318.859	42.0328	128.479
	ENSG00000077157	PPP1R12B	6.96351	7.31307	24.9883	13.0883		ENSG00000077420	APBB1IP	44.5487	146.482	19.404	70.1449		ENSG00000077721	UBE2A	59.8217	15.496	156.148	77.1551		ENSG00000135940	COX5B	354.391	11.7261	19.008	128.375
	ENSG00000077232	DNAJC10	23.1602	26.0879	48.7613	32.6698		ENSG00000077454	LRCH4	104.35	16.939	179.478	100.256		ENSG00000077782	FGFR1	4.79696	56.2719	4.41557	21.8281		ENSG00000166483	WEE1	16.6695	365.466	2.96464	128.367
	ENSG00000077235	GTF3C1	47.4893	48.5946	35.7133	43.9324		ENSG00000077458	FAM76B	16.5286	26.8516	4.67927	16.0198		ENSG00000077800	FKBP6	2.30225	10.8414	57.1994	23.4477		ENSG00000119335	SET	275.294	3.56741	105.555	128.139
	ENSG00000077238	IL4R	37.2657	38.6003	43.7595	39.8752		ENSG00000077463	SIRT6	29.1057	19.6331	21.2531	23.3306		ENSG00000077935	SMC1B	11.6601	1.86393	28.9432	14.1558		ENSG00000187605	TET3	16.5391	31.6399	336.128	128.102
	ENSG00000077254	USP33	46.6231	45.2086	141.027	77.6196		ENSG00000077514	POLD3	19.278	104.562	13.1784	45.6727		ENSG00000077984	CST7	165.07	9.93792	15.9392	63.6491		ENSG00000172009	THOP1	32.4619	346.762	4.8876	128.037
	ENSG00000077312	SNRPA	179.901	174.521	1.74326	118.722		ENSG00000077549	CAPZB	172.292	4.86207	54.1575	77.1037		ENSG00000078043	PIAS2	5.30536	158.694	46.818	70.2725		ENSG00000084112	SSH1	11.6928	185.796	186.62	128.036
	ENSG00000077327	SPAG6	1.95636	2.12216	88.7431	30.9405		ENSG00000077585	GPR137B	5.50887	22.1772	5.67069	11.1189		ENSG00000078061	ARAF	52.977	5.33259	7.69319	22.0009		ENSG00000126091	ST3GAL3	22.8374	358.181	2.42857	127.816
	ENSG00000077348	EXOSC5	108.634	106.209	265.749	160.197		ENSG00000077684	JADE1	22.2304	14.621	2.14136	12.9976		ENSG00000078070	MCCC1	34.9266	57.1151	4.45157	32.1644		ENSG00000070047	PHRF1	30.0285	332.298	20.9944	127.774
	ENSG00000077380	DYNC1I2	275.366	290.24	52.1215	205.909		ENSG00000077713	SLC25A43	14.3077	61.6588	11.9707	29.3124		ENSG00000078124	ACER3	19.3948	29.6557	3.22045	17.4236		ENSG00000126457	PRMT1	232.63	143.908	5.66412	127.401
	ENSG00000077420	APBB1IP	57.7061	55.9391	223.941	112.529		ENSG00000077721	UBE2A	46.633	4.02439	141.826	64.1612		ENSG00000078140	UBE2K	45.8543	16.0908	7.77502	23.24		ENSG00000147123	NDUFB11	162.28	3.21829	215.313	126.937
	ENSG00000077454	LRCH4	187.346	234.628	25.2539	149.076		ENSG00000077782	FGFR1	5.05063	11.6333	5.06588	7.24994		ENSG00000078142	PIK3C3	11.1491	43.1827	7.79357	20.7084		ENSG00000099341	PSMD8	118.104	221.66	40.4834	126.749
	ENSG00000077458	FAM76B	21.948	22.9933	33.6493	26.1969		ENSG00000077800	FKBP6	3.01756	145.178	49.0177	65.7378		ENSG00000078177	N4BP2	4.97684	9.29373	57.9368	24.0691		ENSG00000130595	TNNT3	1.67701	232.265	145.851	126.598
	ENSG00000077463	SIRT6	37.8552	37.3504	30.5186	35.2414		ENSG00000077935	SMC1B	11.7921	4.63476	30.774	15.7336		ENSG00000078237	TIGAR	3.51675	3.49149	200.237	69.0818		ENSG00000141965	FEM1A	10.9474	364.861	3.76961	126.526
	ENSG00000077514	POLD3	31.702	33.2285	205.064	89.9982		ENSG00000077984	CST7	149.164	50.2087	17.5602	72.3109		ENSG00000078246	TULP3	8.62143	3.67745	67.314	26.5376		ENSG00000015475	BID	19.5559	187.068	172.625	126.417
	ENSG00000077549	CAPZB	125.518	121.157	7.36639	84.6804		ENSG00000078043	PIAS2	5.16372	31.4834	48.7316	28.4595		ENSG00000078269	SYNJ2	9.01881	9.96968	41.2628	20.0838		ENSG00000121775	TMEM39B	16.3368	13.7746	349.072	126.394
	ENSG00000077585	GPR137B	5.58333	5.43068	32.4533	14.4891		ENSG00000078061	ARAF	48.2849	17.244	11.5921	25.707		ENSG00000078304	PPP2R5C	69.9012	9.6993	18.1204	32.5736		ENSG00000130204	TOMM40	90.7157	40.6229	247.746	126.362
	ENSG00000077684	JADE1	33.9203	29.9439	19.9081	27.9241		ENSG00000078070	MCCC1	30.5593	47.5046	4.418	27.494		ENSG00000078369	GNB1	210.942	71.0588	111.908	131.303		ENSG00000165943	MOAP1	25.8366	15.8644	336.988	126.23
	ENSG00000077713	SLC25A43	22.0017	21.0803	63.9669	35.683		ENSG00000078124	ACER3	17.6546	10.0493	3.01391	10.2393		ENSG00000078399	HOXA9	62.674	209.427	159.58	143.894		ENSG00000104499	GML	2.86417	33.0516	342.625	126.18
	ENSG00000077721	UBE2A	75.4362	80.1635	9.57466	55.0581		ENSG00000078140	UBE2K	47.0289	4.3705	7.85298	19.7508		ENSG00000078403	MLLT10	26.3207	70.9913	93.1944	63.5021		ENSG00000180628	PCGF5	13.1594	310.216	55.0799	126.152
	ENSG00000077782	FGFR1	8.13309	8.65069	17.1812	11.3216		ENSG00000078142	PIK3C3	10.8173	3.27633	8.50215	7.53193		ENSG00000078487	ZCWPW1	15.7475	41.9452	3.94706	20.5466		ENSG00000101290	CDS2	18.5944	131.752	228.063	126.136
	ENSG00000077800	FKBP6	3.97844	17.5834	201.182	74.2478		ENSG00000078177	N4BP2	4.33614	7.62897	59.131	23.6987		ENSG00000078618	NRDC	120.782	17.3373	16.5486	51.556		ENSG00000088888	MAVS	40.5953	257.871	79.7312	126.066
	ENSG00000077935	SMC1B	16.458	185.532	6.14107	69.3771		ENSG00000078237	TIGAR	3.19908	8.16368	195.152	68.8384		ENSG00000078668	VDAC3	146.938	113.19	22.7034	94.2773		ENSG00000130653	PNPLA7	1.97392	328.95	47.244	126.056
	ENSG00000077984	CST7	197.567	5.90606	71.4125	91.6286		ENSG00000078246	TULP3	8.11251	74.2954	61.2577	47.8885		ENSG00000078674	PCM1	104.329	141.771	2.65468	82.9183		ENSG00000090372	STRN4	96.8132	96.3154	185.026	126.051
	ENSG00000078043	PIAS2	6.24123	73.4558	42.8222	40.8397		ENSG00000078269	SYNJ2	8.73793	200.721	40.7487	83.4025		ENSG00000078687	TNRC6C	5.93163	99.217	161.45	88.8664		ENSG00000234665	LERFS	1.80998	373.422	2.77018	126.001
	ENSG00000078061	ARAF	73.8239	43.5594	25.6458	47.6763		ENSG00000078304	PPP2R5C	71.0291	58.6573	18.3034	49.3299		ENSG00000078699	CBFA2T2	14.821	4.50115	2.99165	7.43792		ENSG00000103319	EEF2K	15.0223	29.7861	332.601	125.803
	ENSG00000078070	MCCC1	44.9582	25.8715	67.0559	45.9619		ENSG00000078369	GNB1	187.784	37.9788	114.192	113.318		ENSG00000078747	ITCH	21.7694	14.911	38.8123	25.1642		ENSG00000118515	SGK1	4.87037	231.473	140.587	125.644
	ENSG00000078124	ACER3	23.7631	68.5136	11.204	34.4936		ENSG00000078399	HOXA9	66.2495	17.9681	121.32	68.5126		ENSG00000078804	TP53INP2	1.27065	19.329	8.81856	9.80606		ENSG00000122566	HNRNPA2B1	362.727	3.98096	10.1329	125.614
	ENSG00000078140	UBE2K	65.5244	10.4849	8.28098	28.0968		ENSG00000078403	MLLT10	33.8666	114.709	100.674	83.083		ENSG00000078808	SDF4	135.347	3.31701	25.2043	54.6229		ENSG00000137161	CNPY3	323.222	39.8483	13.6452	125.572
	ENSG00000078142	PIK3C3	9.23895	7.56111	4.98054	7.2602		ENSG00000078487	ZCWPW1	16.3621	105.225	4.54405	42.0436		ENSG00000078900	TP73	2.23565	161.696	12.2133	58.7149		ENSG00000163468	CCT3	263.286	23.4298	89.9379	125.551
	ENSG00000078177	N4BP2	7.53369	4.98991	11.9463	8.15664		ENSG00000078618	NRDC	116.612	104.596	16.7699	79.326		ENSG00000078902	TOLLIP	40.0842	2.85436	5.74662	16.2284		ENSG00000087995	METTL2A	19.8121	10.1021	345.437	125.117
	ENSG00000078237	TIGAR	4.91282	12.136	14.9427	10.6638		ENSG00000078668	VDAC3	144.679	5.01023	21.1959	56.9616		ENSG00000078967	UBE2D4	11.7542	39.5439	121.1	57.466		ENSG00000105325	FZR1	19.1328	297.324	58.5748	125.01
	ENSG00000078246	TULP3	11.4921	13.5354	83.0919	36.0398		ENSG00000078674	PCM1	103.629	15.6197	2.54562	40.5979		ENSG00000079134	THOC1	32.2175	9.59724	3.14054	14.9851		ENSG00000112514	CUTA	339.482	17.5899	17.8986	124.99
	ENSG00000078269	SYNJ2	14.3318	103.737	261.827	126.632		ENSG00000078687	TNRC6C	5.98675	18.9153	125.028	49.9767		ENSG00000079150	FKBP7	10.1278	21.3753	22.8971	18.1334		ENSG00000096968	JAK2	7.19656	339.8	27.9588	124.985
	ENSG00000078304	PPP2R5C	74.4514	265.391	106.581	148.808		ENSG00000078699	CBFA2T2	16.1383	2.81155	2.12883	7.02624		ENSG00000079215	SLC1A3	6.18434	10.5332	2.06247	6.26001		ENSG00000104833	TUBB4A	2.36278	1.75234	370.433	124.849
	ENSG00000078319	PMS2P1	1.27877	102.902	41.1469	48.4426		ENSG00000078747	ITCH	16.0117	134.71	34.7373	61.8197		ENSG00000079246	XRCC5	117.912	8.02845	27.9066	51.2822		ENSG00000130724	CHMP2A	134.837	216.743	21.2308	124.27
	ENSG00000078369	GNB1	208.908	47.4678	17.8405	91.4054		ENSG00000078804	TP53INP2	2.5784	2.77064	11.4828	5.61062		ENSG00000079263	SP140	3.43768	119.641	35.3615	52.8135		ENSG00000113269	RNF130	216.57	43.3897	112.581	124.18
	ENSG00000078399	HOXA9	109.445	18.0783	164.977	97.5001		ENSG00000078808	SDF4	141.979	35.8723	26.648	68.1664		ENSG00000079277	MKNK1	25.6282	1.71674	4.52253	10.6225		ENSG00000002834	LASP1	143.889	141.53	87.0091	124.143
	ENSG00000078403	MLLT10	46.2175	176.914	132.59	118.574		ENSG00000078900	TP73	2.48716	10.3685	10.4667	7.7741		ENSG00000079308	TNS1	1.68378	27.5181	6.08192	11.7613		ENSG00000182087	TMEM259	89.8485	261.485	20.9336	124.089
	ENSG00000078487	ZCWPW1	17.7968	176.385	134.879	109.687		ENSG00000078902	TOLLIP	35.3214	26.2986	6.99408	22.8714		ENSG00000079313	REXO1	24.8523	1.55815	9.84582	12.0854		ENSG00000131732	ZCCHC9	37.1655	328.232	6.36561	123.921
	ENSG00000078618	NRDC	170.239	139.379	6.02883	105.216		ENSG00000078967	UBE2D4	10.0592	14.225	116.691	46.9917		ENSG00000079332	SAR1A	31.7151	30.1739	28.1181	30.0024		ENSG00000100823	APEX1	229.545	138.799	3.35883	123.901
	ENSG00000078668	VDAC3	180.244	6.39046	13.7253	66.7864		ENSG00000079134	THOC1	26.5449	6.38949	3.69595	12.2101		ENSG00000079335	CDC14A	4.66762	31.5619	265.892	100.707		ENSG00000088038	CNOT3	68.184	128.608	174.841	123.878
	ENSG00000078674	PCM1	136.966	14.6833	28.2785	59.9759		ENSG00000079150	FKBP7	12.7677	118.845	21.6284	51.0803		ENSG00000079337	RAPGEF3	4.96881	4.36532	60.2708	23.2016		ENSG00000187688	TRPV2	18.0987	324.863	28.1728	123.712
	ENSG00000078687	TNRC6C	5.87498	30.15	4.63418	13.5531		ENSG00000079215	SLC1A3	6.45497	2.35465	1.40534	3.40499		ENSG00000079387	SENP1	9.71978	5.33005	134.592	49.8808		ENSG00000162929	SANBR	6.92337	360.513	3.26901	123.569
	ENSG00000078699	CBFA2T2	15.6156	5.58864	128.35	49.8513		ENSG00000079246	XRCC5	117.185	22.7505	26.0343	55.3232		ENSG00000079432	CIC	34.5933	8.19947	100.275	47.6892		ENSG00000115234	SNX17	62.5736	147.023	160.39	123.329
	ENSG00000078747	ITCH	19.9692	132.918	4.52633	52.4711		ENSG00000079263	SP140	2.86858	1.34088	33.4634	12.5576		ENSG00000079459	FDFT1	284.571	37.8485	74.2238	132.214		ENSG00000139684	ESD	353.542	8.4746	7.89047	123.302
	ENSG00000078804	TP53INP2	4.49991	3.99837	45.7967	18.0983		ENSG00000079277	MKNK1	24.1069	24.0318	4.0712	17.4033		ENSG00000079462	PAFAH1B3	56.5589	265.03	182.247	167.945		ENSG00000116350	SRSF4	138.851	38.674	191.799	123.108
	ENSG00000078808	SDF4	149.006	20.1947	13.6205	60.9404		ENSG00000079308	TNS1	1.27358	35.7711	5.73184	14.2588		ENSG00000079616	KIF22	140.1	71.8912	7.50251	73.1646		ENSG00000087087	SRRT	238.339	31.4103	99.2226	122.991
	ENSG00000078900	TP73	4.84887	12.4404	35.0063	17.4318		ENSG00000079313	REXO1	28.7487	4.60453	9.08933	14.1475		ENSG00000079739	PGM1	107.879	134.365	5.72055	82.655		ENSG00000162378	ZYG11B	5.76457	354.938	7.6884	122.797
	ENSG00000078902	TOLLIP	48.673	31.3169	12.8398	30.9432		ENSG00000079332	SAR1A	33.8087	5.84184	26.6287	22.0931		ENSG00000079785	DDX1	77.0547	1.57049	106.414	61.6797		ENSG00000105639	JAK3	21.6197	333.403	13.2936	122.772
	ENSG00000078967	UBE2D4	14.8565	11.877	9.12566	11.953		ENSG00000079335	CDC14A	4.06347	7.40037	239.039	83.5009		ENSG00000079805	DNM2	165.734	104.354	4.48404	91.524		ENSG00000111642	CHD4	158.194	8.06889	201.681	122.648
	ENSG00000079134	THOC1	36.3919	11.7557	190.753	79.6336		ENSG00000079337	RAPGEF3	6.00805	28.3263	43.4453	25.9265		ENSG00000079950	STX7	7.64766	73.3197	16.7849	32.5841		ENSG00000100764	PSMC1	90.5379	241.239	36.0696	122.615
	ENSG00000079150	FKBP7	10.1608	191.289	4.38563	68.6119		ENSG00000079387	SENP1	9.06436	182.08	123.424	104.856		ENSG00000079974	RABL2B	6.85672	158.018	6.53662	57.1371		ENSG00000112531	QKI	26.3617	63.877	277.37	122.536
	ENSG00000079215	SLC1A3	10.982	4.84983	31.4893	15.7737		ENSG00000079432	CIC	28.5126	47.5681	94.1548	56.7452		ENSG00000079999	KEAP1	115.688	7.25129	1.14498	41.3613		ENSG00000168439	STIP1	265.476	90.1041	11.3663	122.316
	ENSG00000079246	XRCC5	197.113	32.0074	2.49219	77.204		ENSG00000079459	FDFT1	221.55	126.005	77.9313	141.829		ENSG00000080031	PTPRH	5.81011	4.64792	15.6081	8.68872		ENSG00000143815	LBR	66.383	125.519	175	122.3
	ENSG00000079263	SP140	3.95612	3.30984	32.6191	13.295		ENSG00000079462	PAFAH1B3	54.7012	100.332	156.196	103.743		ENSG00000080189	SLC35C2	20.4942	112.777	6.99794	46.7563		ENSG00000104979	C19orf53	174.031	105.183	87.2302	122.148
	ENSG00000079277	MKNK1	32.3045	32.8167	44.8386	36.6532		ENSG00000079616	KIF22	123.917	80.0618	8.85961	70.9463		ENSG00000080200	CRYBG3	7.97005	7.97703	43.0854	19.6775		ENSG00000240494	RPS12P28	3.49698	3.9966	358.719	122.071
	ENSG00000079308	TNS1	2.66858	14.7478	6.61404	8.01014		ENSG00000079739	PGM1	94.8313	164.259	6.56173	88.5507		ENSG00000080345	RIF1	15.0798	16.9875	2.8353	11.6342		ENSG00000013810	TACC3	205.449	85.5517	75.1886	122.063
	ENSG00000079313	REXO1	35.1428	6.95254	4.43782	15.511		ENSG00000079785	DDX1	80.7387	8.09573	70.5352	53.1232		ENSG00000080371	RAB21	10.7117	6.40059	21.7325	12.9483		ENSG00000146963	LUC7L2	60.1609	36.201	269.816	122.059
	ENSG00000079332	SAR1A	43.1489	5.09647	15.0534	21.0996		ENSG00000079805	DNM2	160.249	6.41671	8.09247	58.2528		ENSG00000080503	SMARCA2	40.6089	13.1425	25.3059	26.3524		ENSG00000111641	NOP2	60.8689	190.52	113.935	121.775
	ENSG00000079335	CDC14A	6.92209	15.3461	45.7709	22.6797		ENSG00000079950	STX7	9.80408	97.9126	15.3251	41.0139		ENSG00000080546	SESN1	5.01052	7.02661	6.33875	6.1253		ENSG00000136197	C7orf25	7.57595	3.858	353.365	121.6
	ENSG00000079337	RAPGEF3	4.82691	45.0016	244.837	98.2219		ENSG00000079974	RABL2B	6.79944	6.0259	7.49909	6.77481		ENSG00000080603	SRCAP	26.8211	39.8129	12.1621	26.2654		ENSG00000143256	PFDN2	209.398	67.6161	87.5859	121.533
	ENSG00000079387	SENP1	14.1542	244.974	84.5938	114.574		ENSG00000079999	KEAP1	102.403	12.2241	1.58151	38.7361		ENSG00000080608	PUM3	23.3626	2.37656	25.2189	16.986		ENSG00000185753	CXorf38	22.0525	138.428	204.008	121.496
	ENSG00000079432	CIC	47.7075	87.9059	151.448	95.6872		ENSG00000080031	PTPRH	7.07226	7.3171	15.1866	9.85867		ENSG00000080709	KCNN2	5.82282	9.92823	49.6336	21.7949		ENSG00000142227	EMP3	329.95	21.5229	12.4721	121.315
	ENSG00000079459	FDFT1	235.286	158.489	1.45991	131.745		ENSG00000080189	SLC35C2	15.1366	1.98587	9.20632	8.77627		ENSG00000080802	CNOT4	12.739	25.5398	64.584	34.2876		ENSG00000162391	FAM151A	1.84933	9.69553	351.844	121.13
	ENSG00000079462	PAFAH1B3	81.263	1.20878	114.427	65.633		ENSG00000080200	CRYBG3	6.87356	15.7439	40.3115	20.9763		ENSG00000080815	PSEN1	23.9167	5.18183	1.53872	10.2124		ENSG00000087074	PPP1R15A	227.884	121.34	14.0552	121.093
	ENSG00000079616	KIF22	147.006	114.006	117.555	126.189		ENSG00000080298	RFX3	1.3783	11.1886	3.98876	5.51856		ENSG00000080819	CPOX	48.8809	11.7538	646.193	235.609		ENSG00000169714	CNBP	243.074	53.776	66.2497	121.033
	ENSG00000079691	CARMIL1	1.28391	105.907	220.014	109.068		ENSG00000080345	RIF1	14.1119	41.8557	4.65391	20.2072		ENSG00000080822	CLDND1	68.5024	24.9861	11.0688	34.8524		ENSG00000087053	MTMR2	3.6743	245.142	113.836	120.884
	ENSG00000079739	PGM1	112.4	224.521	11.1927	116.038		ENSG00000080371	RAB21	10.2752	3.50807	24.6462	12.8098		ENSG00000080824	HSP90AA1	672.167	48.9434	16.2419	245.784		ENSG00000204435	CSNK2B	218.006	136.53	7.89099	120.809
	ENSG00000079785	DDX1	119.956	12.7257	10.0137	47.5653		ENSG00000080503	SMARCA2	41.8461	6.73313	5.63857	18.0726		ENSG00000080839	RBL1	9.68375	70.8543	41.9903	40.8428		ENSG00000247596	TWF2	151.786	106.713	103.542	120.681
	ENSG00000079805	DNM2	211.832	12.0838	129.252	117.723		ENSG00000080546	SESN1	3.40333	25.2459	13.2076	13.9523		ENSG00000080845	DLGAP4	13.6969	1.37507	6.52577	7.19926		ENSG00000168090	COPS6	220.567	55.9753	85.4285	120.657
	ENSG00000079950	STX7	10.0951	132.518	7.34833	49.987		ENSG00000080603	SRCAP	4.74684	5.82899	25.9647	12.1802		ENSG00000080986	NDC80	45.9173	652.624	12.0369	236.859		ENSG00000116221	MRPL37	101.734	133.326	126.909	120.657
	ENSG00000079974	RABL2B	9.81084	7.75506	19.7176	12.4278		ENSG00000080608	PUM3	25.3314	12.7286	48.6253	28.8951		ENSG00000081014	AP4E1	6.47336	10.7774	2.564	6.60493		ENSG00000127995	CASD1	4.58062	320.915	36.1678	120.555
	ENSG00000079999	KEAP1	132.284	26.1473	10.0908	56.1741		ENSG00000080709	KCNN2	5.89288	25.0766	64.7326	31.9007		ENSG00000081019	RSBN1	14.5678	15.76	20.1029	16.8103		ENSG00000099797	TECR	233.445	4.12304	123.315	120.294
	ENSG00000080031	PTPRH	8.56215	10.531	1.52291	6.87202		ENSG00000080802	CNOT4	12.0682	43.368	652.215	235.884		ENSG00000081026	MAGI3	2.31922	35.275	181.47	73.0214		ENSG00000102034	ELF4	26.6128	21.4918	312.678	120.261
	ENSG00000080189	SLC35C2	26.3986	2.6113	27.4074	18.8058		ENSG00000080815	PSEN1	20.9778	50.7699	10.5529	27.4335		ENSG00000081087	OSTM1	20.0198	6.00153	4.8645	10.2953		ENSG00000107581	EIF3A	193.448	31.4891	135.609	120.182
	ENSG00000080200	CRYBG3	9.76561	27.839	10.2174	15.9407		ENSG00000080819	CPOX	42.4258	740.05	13.4378	265.305		ENSG00000081154	PCNP	199.549	17.3638	1.15116	72.6878		ENSG00000133069	TMCC2	3.00677	30.2624	326.758	120.009
	ENSG00000080298	RFX3	1.91803	11.904	45.7612	19.8611		ENSG00000080822	CLDND1	54.9155	10.34	44.042	36.4325		ENSG00000081177	EXD2	6.56056	1.95636	40.0725	16.1965		ENSG00000168490	PHYHIP	1.53645	22.6414	335.658	119.945
	ENSG00000080345	RIF1	26.0579	47.2505	3.75413	25.6875		ENSG00000080824	HSP90AA1	718.887	12.1964	6.79916	245.961		ENSG00000081181	ARG2	1.68022	20.2183	14.4823	12.1269		ENSG00000105982	RNF32	1.67197	133.005	225.044	119.907
	ENSG00000080371	RAB21	9.81119	3.92752	9.35708	7.6986		ENSG00000080839	RBL1	10.7613	46.5252	11.7974	23.028		ENSG00000081189	MEF2C	1.8981	174.428	30.4602	68.9289		ENSG00000129559	NEDD8	244.043	40.5591	74.6768	119.76
	ENSG00000080503	SMARCA2	47.0187	16.6051	53.7848	39.1362		ENSG00000080845	DLGAP4	13.5907	6.45162	2.20143	7.41459		ENSG00000081237	PTPRC	43.6187	4.95688	4.41892	17.6648		ENSG00000031081	ARHGAP31	2.19475	24.4223	332.582	119.733
	ENSG00000080546	SESN1	5.01588	55.9257	12.8412	24.5943		ENSG00000080986	NDC80	42.124	10.7863	19.0291	23.9798		ENSG00000081307	UBA5	14.5543	2.27716	13.8545	10.2287		ENSG00000135845	PIGC	38.2101	5.97126	314.896	119.692
	ENSG00000080603	SRCAP	11.7658	14.5462	14.1817	13.4979		ENSG00000081014	AP4E1	6.56108	2.45898	178.472	62.4972		ENSG00000081320	STK17B	30.2461	2.43404	3.34563	12.0086		ENSG00000133226	SRRM1	284.419	24.4142	50.2293	119.688
	ENSG00000080608	PUM3	51.5433	14.1497	28.1174	31.2702		ENSG00000081019	RSBN1	11.91	19.0079	5.95066	12.2895		ENSG00000081386	ZNF510	5.09106	41.6266	35.7612	27.4929		ENSG00000180340	FZD2	14.2422	14.6651	329.633	119.513
	ENSG00000080709	KCNN2	11.8833	30.8412	50.1441	30.9562		ENSG00000081026	MAGI3	2.06171	170.92	2.20633	58.3959		ENSG00000081665	ZNF506	15.3577	17.1704	22.8179	18.4487		ENSG00000104765	BNIP3L	62.096	265.566	30.8256	119.496
	ENSG00000080802	CNOT4	14.862	50.1143	82.0608	49.0124		ENSG00000081087	OSTM1	19.1635	7.26824	2.04487	9.4922		ENSG00000081692	JMJD4	2.10278	30.2414	22.8382	18.3941		ENSG00000100353	EIF3D	343.603	11.2598	3.28162	119.381
	ENSG00000080815	PSEN1	31.5835	88.3836	1.78764	40.5849		ENSG00000081154	PCNP	172.687	1.9062	42.366	72.3198		ENSG00000081721	DUSP12	35.3871	5.09847	30.26	23.5818		ENSG00000203667	COX20	23.5428	164.108	170.291	119.314
	ENSG00000080819	CPOX	61.0598	1.66711	477.118	179.948		ENSG00000081177	EXD2	5.99611	1.94275	15.6079	7.84893		ENSG00000081760	AACS	19.9551	17.2724	14.3168	17.1814		ENSG00000003756	RBM5	179.58	164.821	13.4435	119.282
	ENSG00000080822	CLDND1	80.1828	485.941	21.5861	195.903		ENSG00000081181	ARG2	3.10992	43.4294	29.0634	25.2009		ENSG00000081791	DELE1	22.93	2.52099	33.1318	19.5276		ENSG00000104946	TBC1D17	36.5167	285.042	35.8024	119.12
	ENSG00000080823	MOK	1.71838	22.0375	24.2621	16.006		ENSG00000081189	MEF2C	1.33907	13.8787	5.80495	7.00758		ENSG00000081870	IFT25	27.7068	33.9876	27.0591	29.5845		ENSG00000071553	ATP6AP1	78.2567	174.038	105.036	119.11
	ENSG00000080824	HSP90AA1	468.882	23.8165	54.1276	182.275		ENSG00000081237	PTPRC	42.4719	29.3453	16.4438	29.4203		ENSG00000081913	PHLPP1	15.0042	21.0125	25.204	20.4069		ENSG00000128045	RASL11B	1.66705	343.681	11.9373	119.095
	ENSG00000080839	RBL1	20.5501	53.1115	8.5802	27.4139		ENSG00000081307	UBA5	15.7351	5.39712	1.22895	7.45373		ENSG00000082014	SMARCD3	29.6816	22.9755	12.8665	21.8412		ENSG00000197471	SPN	238.27	86.8915	32.0614	119.074
	ENSG00000080845	DLGAP4	22.3718	8.38707	10.3553	13.7047		ENSG00000081320	STK17B	29.0724	15.5068	37.3127	27.2973		ENSG00000082068	WDR70	24.4306	35.5888	44.0944	34.7046		ENSG00000105063	PPP6R1	264.137	4.66163	88.1335	118.977
	ENSG00000080986	NDC80	51.9661	9.67991	2.73676	21.4609		ENSG00000081386	ZNF510	5.86092	37.9643	19.207	21.0108		ENSG00000082074	FYB1	29.1647	14.5447	1.26914	14.9929		ENSG00000170248	PDCD6IP	82.2127	227.228	47.4563	118.966
	ENSG00000081014	AP4E1	8.67163	2.88232	2.13108	4.56168		ENSG00000081665	ZNF506	14.7254	19.0896	16.4988	16.7713		ENSG00000082146	STRADB	13.926	30.6155	26.7304	23.7573		ENSG00000172354	GNB2	309.362	8.86746	38.5189	118.916
	ENSG00000081019	RSBN1	14.2624	1.27532	32.2197	15.9192		ENSG00000081692	JMJD4	1.29458	18.7991	25.3534	15.149		ENSG00000082153	BZW1	42.9449	20.5237	16.5897	26.6861		ENSG00000178623	GPR35	18.4036	53.6969	284.392	118.831
	ENSG00000081026	MAGI3	3.06075	33.0257	220.717	85.6012		ENSG00000081721	DUSP12	36.5519	25.9425	12.1965	24.8969		ENSG00000082212	ME2	27.0915	27.1292	6.98466	20.4018		ENSG00000166439	RNF169	10.0735	340.578	5.44644	118.699
	ENSG00000081041	CXCL2	1.8304	230.61	6.9112	79.7839		ENSG00000081760	AACS	18.9714	12.5537	29.0102	20.1785		ENSG00000082213	C5orf22	16.5689	14.8477	3.72463	11.7138		ENSG00000125107	CNOT1	51.0326	204.604	100.395	118.677
	ENSG00000081087	OSTM1	33.6566	6.09365	3.51622	14.4222		ENSG00000081791	DELE1	19.4367	26.556	23.18	23.0575		ENSG00000082258	CCNT2	13.3365	48.7915	16.2787	26.1355		ENSG00000132002	DNAJB1	322.991	12.5242	20.1187	118.544
	ENSG00000081154	PCNP	217.872	3.27134	1.89597	74.3463		ENSG00000081870	IFT25	24.6616	25.7879	29.7288	26.7261		ENSG00000082269	FAM135A	6.46307	1.83176	3.15432	3.81638		ENSG00000282572	FAM157D	1.5917	343.316	10.6738	118.527
	ENSG00000081177	EXD2	6.69766	2.70989	61.6111	23.6729		ENSG00000081913	PHLPP1	12.9741	29.7058	12.7429	18.4743		ENSG00000082397	EPB41L3	23.8195	31.7921	16.6671	24.0929		ENSG00000134440	NARS1	143.54	185.792	26.084	118.472
	ENSG00000081181	ARG2	3.85697	60.1751	21.7824	28.6048		ENSG00000082014	SMARCD3	29.2015	12.3007	56.1669	32.5564		ENSG00000082512	TRAF5	3.44798	18.4169	6.65472	9.50653		ENSG00000130638	ATXN10	20.2627	27.7795	307.025	118.356
	ENSG00000081189	MEF2C	2.10867	22.0747	38.2575	20.8136		ENSG00000082068	WDR70	20.7221	50.4179	1.86106	24.3337		ENSG00000082515	MRPL22	19.1532	8.11098	1.53466	9.5996		ENSG00000105701	FKBP8	318.674	24.2328	11.9901	118.299
	ENSG00000081237	PTPRC	58.2843	38.7699	6.97249	34.6756		ENSG00000082074	FYB1	30.96	1.59666	33.8341	22.1302		ENSG00000082516	GEMIN5	6.92134	6.01392	55.1148	22.6833		ENSG00000069493	CLEC2D	5.18577	22.6867	326.457	118.11
	ENSG00000081307	UBA5	22.421	6.23903	15.3972	14.6857		ENSG00000082146	STRADB	11.4928	31.8646	18.5867	20.648		ENSG00000082556	OPRK1	1.58577	17.9152	24.2937	14.5982		ENSG00000204389	HSPA1A	333.028	19.0101	2.24032	118.093
	ENSG00000081320	STK17B	38.916	17.9974	6.17972	21.031		ENSG00000082153	BZW1	53.5531	19.3951	14.5942	29.1808		ENSG00000082641	NFE2L1	56.9158	3.5756	8.7463	23.0792		ENSG00000130684	ZNF337	5.55269	36.2886	312.276	118.039
	ENSG00000081377	CDC14B	1.14677	7.19406	51.632	19.991		ENSG00000082196	C1QTNF3	1.35668	12.8708	6.54745	6.92497		ENSG00000082701	GSK3B	24.7314	12.9237	73.3991	37.0181		ENSG00000088832	FKBP1A	143.717	7.87569	202.407	118
	ENSG00000081386	ZNF510	6.91534	52.5927	24.9233	28.1438		ENSG00000082212	ME2	26.844	6.05712	18.7833	17.2281		ENSG00000082805	ERC1	8.69506	6.31847	39.4466	18.1534		ENSG00000173744	AGFG1	26.9155	44.0242	282.952	117.964
	ENSG00000081665	ZNF506	16.8317	24.6833	32.1881	24.5677		ENSG00000082213	C5orf22	18.2995	19.5834	3.61722	13.8334		ENSG00000082898	XPO1	83.3471	1.63606	19.319	34.7674		ENSG00000204592	HLA-E	297.834	12.3557	43.678	117.956
	ENSG00000081692	JMJD4	7.59148	32.9988	31.7288	24.1064		ENSG00000082258	CCNT2	12.5946	3.65239	21.6232	12.6234		ENSG00000082996	RNF13	45.3224	44.2842	3.69106	31.0992		ENSG00000247982	LINC00926	187.157	163.649	2.89358	117.9
	ENSG00000081721	DUSP12	51.3751	33.9984	12.8019	32.7251		ENSG00000082269	FAM135A	7.60094	14.8712	6.67263	9.71492		ENSG00000083093	PALB2	18.057	26.3726	19.9937	21.4744		ENSG00000196975	ANXA4	49.0541	291.225	13.2359	117.838
	ENSG00000081760	AACS	25.9504	12.9411	31.4536	23.4484		ENSG00000082397	EPB41L3	19.4931	6.77684	1.65356	9.30785		ENSG00000083097	DOP1A	3.48827	8.09784	7.18424	6.25678		ENSG00000179262	RAD23A	286.706	64.7333	1.58598	117.675
	ENSG00000081791	DELE1	32.0855	29.1394	29.225	30.15		ENSG00000082512	TRAF5	3.26321	1.95384	45.6981	16.9717		ENSG00000083099	LYRM2	16.2571	91.5005	30.5721	46.1099		ENSG00000101997	CCDC22	70.6295	25.5733	256.387	117.53
	ENSG00000081870	IFT25	34.9248	31.0617	21.032	29.0061		ENSG00000082515	MRPL22	17.3568	22.141	25.5405	21.6794		ENSG00000083123	BCKDHB	5.62911	37.5656	11.8745	18.3564		ENSG00000152256	PDK1	139.227	198.99	13.6536	117.29
	ENSG00000081913	PHLPP1	14.7419	22.5271	21.1682	19.4791		ENSG00000082516	GEMIN5	6.2748	24.623	9.19355	13.3638		ENSG00000083168	KAT6A	17.4402	18.8478	20.5991	18.9624		ENSG00000124702	KLHDC3	127.299	216.901	7.66732	117.289
	ENSG00000082014	SMARCD3	33.2183	17.9898	73.8848	41.6977		ENSG00000082556	OPRK1	1.75545	9.46427	85.1497	32.1231		ENSG00000083223	TUT7	11.4752	5.96875	57.3737	24.9392		ENSG00000069399	BCL3	18.9327	291.856	40.388	117.059
	ENSG00000082068	WDR70	29.967	73.6497	1.01725	34.878		ENSG00000082641	NFE2L1	46.8116	71.8828	43.2131	53.9692		ENSG00000083312	TNPO1	22.8457	17.2657	6.07803	15.3965		ENSG00000063244	U2AF2	240.28	15.032	95.4683	116.927
	ENSG00000082074	FYB1	21.858	1.45162	36.3038	19.8711		ENSG00000082701	GSK3B	24.0458	47.4596	21.2531	30.9195		ENSG00000083444	PLOD1	58.553	8.18926	39.2057	35.316		ENSG00000185989	RASA3	114.251	19.26	217.156	116.889
	ENSG00000082146	STRADB	19.9634	77.7878	27.4628	41.738		ENSG00000082805	ERC1	10.0742	20.5775	4.81024	11.8206		ENSG00000083454	P2RX5	4.71834	26.0206	19.9866	16.9085		ENSG00000179168	GGN	7.47193	305.435	37.6159	116.841
	ENSG00000082153	BZW1	69.9902	29.3148	15.5006	38.2686		ENSG00000082898	XPO1	68.7258	6.84228	16.7268	30.7649		ENSG00000083457	ITGAE	34.6168	12.7963	17.1554	21.5228		ENSG00000069424	KCNAB2	320.05	5.51151	24.7359	116.766
	ENSG00000082196	C1QTNF3	1.09987	14.1957	11.6413	8.97898		ENSG00000082996	RNF13	41.1286	22.0791	8.57199	23.9266		ENSG00000083520	DIS3	19.6371	19.3244	10.9473	16.6363		ENSG00000084234	APLP2	334.051	8.72735	7.36858	116.716
	ENSG00000082212	ME2	38.7313	11.2694	19.7296	23.2434		ENSG00000083093	PALB2	19.9866	8.04386	30.7114	19.5806		ENSG00000083535	PIBF1	16.7352	56.5442	16.0497	29.7764		ENSG00000062485	CS	188.058	7.28081	154.518	116.619
	ENSG00000082213	C5orf22	26.6931	19.3725	6.10761	17.3911		ENSG00000083097	DOP1A	5.38442	32.566	14.3101	17.4202		ENSG00000083544	TDRD3	11.6065	5.59667	29.8517	15.685		ENSG00000183019	MCEMP1	184.894	162.958	1.62782	116.493
	ENSG00000082258	CCNT2	10.2384	5.37784	29.3474	14.9879		ENSG00000083099	LYRM2	19.1358	15.8091	19.7414	18.2288		ENSG00000083635	NUFIP1	13.3705	32.2217	8.42469	18.0056		ENSG00000102030	NAA10	53.4178	5.52024	289.985	116.308
	ENSG00000082269	FAM135A	12.4969	33.6896	13.6817	19.9561		ENSG00000083123	BCKDHB	6.29031	21.6888	51.2155	26.3982		ENSG00000083642	PDS5B	28.4724	20.3419	15.013	21.2758		ENSG00000102100	SLC35A2	24.1265	279.25	45.2519	116.209
	ENSG00000082397	EPB41L3	19.6673	14.433	2.33998	12.1468		ENSG00000083168	KAT6A	25.9127	47.0808	2.34505	25.1128		ENSG00000083720	OXCT1	9.31675	21.661	9.76859	13.5821		ENSG00000163319	MRPS18C	32.9313	146.804	168.701	116.146
	ENSG00000082512	TRAF5	4.72236	2.21838	92.0607	33.0005		ENSG00000083223	TUT7	14.6534	3.9954	38.1453	18.9314		ENSG00000083750	RRAGB	10.9991	10.7588	28.4795	16.7458		ENSG00000184428	TOP1MT	193.494	90.3492	64.0255	115.956
	ENSG00000082515	MRPL22	27.5268	71.6563	35.5199	44.901		ENSG00000083312	TNPO1	22.2269	37.3982	19.2707	26.2986		ENSG00000083799	CYLD	11.1716	12.2297	4.75116	9.38417		ENSG00000173272	MZT2A	225.561	51.85	70.4292	115.947
	ENSG00000082516	GEMIN5	12.8119	37.9053	14.9978	21.905		ENSG00000083444	PLOD1	47.6837	20.6973	21.3783	29.9198		ENSG00000083807	SLC27A5	22.7764	26.6161	2.28658	17.2263		ENSG00000172262	ZNF131	33.1927	15.5434	298.784	115.84
	ENSG00000082556	OPRK1	2.20076	14.9135	113.223	43.4459		ENSG00000083454	P2RX5	4.22455	20.8999	10.8752	11.9999		ENSG00000083812	ZNF324	6.13697	10.3149	2.73533	6.39574		ENSG00000101150	TPD52L2	53.8046	282.089	11.6025	115.832
	ENSG00000082641	NFE2L1	69.032	129.89	48.8131	82.5783		ENSG00000083457	ITGAE	43.1255	12.0166	13.9639	23.0353		ENSG00000083817	ZNF416	3.43073	17.8783	6.38973	9.23292		ENSG00000116161	CACYBP	83.1493	256.841	7.15703	115.716
	ENSG00000082701	GSK3B	36.4264	46.6067	28.0799	37.0377		ENSG00000083520	DIS3	20.0055	14.4022	24.0617	19.4898		ENSG00000083828	ZNF586	1.53445	10.9798	4434.14	1482.22		ENSG00000071626	DAZAP1	126.921	159.043	60.9015	115.622
	ENSG00000082805	ERC1	15.4894	28.2852	7.75441	17.1764		ENSG00000083535	PIBF1	20.0754	24.2794	9.05885	17.8046		ENSG00000083838	ZNF446	4.29946	22.7749	49.3744	25.4829		ENSG00000105245	NUMBL	25.4392	75.724	245.278	115.48
	ENSG00000082898	XPO1	134.825	8.31232	30.5222	57.8865		ENSG00000083544	TDRD3	11.0506	9.73067	17.3133	12.6982		ENSG00000083845	RPS5	4571.34	3.47468	37.6727	1537.5		ENSG00000165502	RPL36AL	319.594	13.3937	13.3358	115.441
	ENSG00000082996	RNF13	48.7506	32.7377	14.6995	32.0626		ENSG00000083635	NUFIP1	12.7386	16.6042	10.5175	13.2868		ENSG00000083896	YTHDC1	52.6881	1.69945	52.6186	35.6687		ENSG00000084623	EIF3I	152.946	93.5207	99.8458	115.437
	ENSG00000083093	PALB2	26.8743	14.8528	47.4312	29.7194		ENSG00000083642	PDS5B	24.3934	10.1185	19.8841	18.132		ENSG00000083937	CHMP2B	34.3097	2.02962	22.186	19.5084		ENSG00000167863	ATP5PD	261.95	60.5103	23.737	115.399
	ENSG00000083097	DOP1A	6.99906	48.4902	15.3625	23.6173		ENSG00000083720	OXCT1	8.56778	19.5955	6.09996	11.4211		ENSG00000084070	SMAP2	52.2777	6.26784	23.3672	27.3042		ENSG00000149761	NUDT22	16.6321	97.3028	232.034	115.323
	ENSG00000083099	LYRM2	29.3445	15.1469	45.4729	29.9881		ENSG00000083750	RRAGB	14.1719	4.57381	3.78985	7.51187		ENSG00000084072	PPIE	20.0097	4680.38	105.032	1601.81		ENSG00000105329	TGFB1	171.283	111.676	62.7688	115.242
	ENSG00000083123	BCKDHB	12.565	46.3423	54.1323	37.6799		ENSG00000083799	CYLD	11.3665	3.25259	2.03548	5.55152		ENSG00000084073	ZMPSTE24	22.4297	40.9059	41.5526	34.9627		ENSG00000165996	HACD1	6.53897	298.133	40.4707	115.048
	ENSG00000083168	KAT6A	47.3533	49.5445	8.15793	35.0186		ENSG00000083807	SLC27A5	17.2365	2.93946	6.11798	8.76465		ENSG00000084090	STARD7	101.684	37.6092	12.1891	50.494		ENSG00000104643	MTMR9	6.18999	27.1929	311.389	114.924
	ENSG00000083223	TUT7	14.7639	9.08229	52.0047	25.2836		ENSG00000083812	ZNF324	3.60921	5.03032	4220.62	1409.75		ENSG00000084092	NOA1	35.3407	52.9873	10.4897	32.9392		ENSG00000237550	-	338.713	2.99525	2.77251	114.827
	ENSG00000083312	TNPO1	46.1196	49.1297	35.8745	43.7079		ENSG00000083817	ZNF416	3.50969	4025.13	50.453	1359.7		ENSG00000084093	REST	14.1829	20.6561	12.0833	15.6408		ENSG00000283341	-	2.21997	339.998	1.73589	114.651
	ENSG00000083444	PLOD1	49.6628	36.905	27.8408	38.1362		ENSG00000083828	ZNF586	2.42895	49.3063	38.9361	30.2238		ENSG00000084110	HAL	13.11	23.4311	1117.77	384.769		ENSG00000100201	DDX17	136.091	141.24	66.2354	114.522
	ENSG00000083454	P2RX5	10.1627	29.5548	13.8623	17.8599		ENSG00000083838	ZNF446	7.28673	40.7886	54.3961	34.1571		ENSG00000084112	SSH1	11.1592	99.6887	334.787	148.545		ENSG00000167522	ANKRD11	100.481	237.829	5.16365	114.491
	ENSG00000083457	ITGAE	43.2279	15.1959	22.6256	27.0165		ENSG00000083845	RPS5	4170.71	56.057	24.5209	1417.1		ENSG00000084207	GSTP1	1131.14	40.029	7.81792	392.997		ENSG00000197147	LRRC8B	1.66429	280.087	61.7001	114.484
	ENSG00000083520	DIS3	30.2933	21.2268	35.9377	29.1526		ENSG00000083896	YTHDC1	40.0421	23.0443	24.613	29.2331		ENSG00000084234	APLP2	352.938	13.4086	41.4505	135.933		ENSG00000100345	MYH9	298.501	32.4232	12.4628	114.462
	ENSG00000083535	PIBF1	27.9502	40.4135	17.082	28.4819		ENSG00000083937	CHMP2B	38.033	25.1755	98.3885	53.8657		ENSG00000084444	FAM234B	5.80933	10.6246	180.109	65.5144		ENSG00000100726	TELO2	24.5068	62.9839	255.841	114.444
	ENSG00000083544	TDRD3	13.3597	17.3028	17.4423	16.0349		ENSG00000084070	SMAP2	52.6669	101.132	39.9795	64.5927		ENSG00000084463	WBP11	41.6463	11.4224	31.4925	28.1871		ENSG00000181788	SIAH2	55.9091	111.729	175.613	114.417
	ENSG00000083635	NUFIP1	21.646	18.1579	13.4711	17.7583		ENSG00000084072	PPIE	22.4629	35.9292	14.025	24.139		ENSG00000084623	EIF3I	183.818	1141.44	7.76073	444.34		ENSG00000180879	SSR4	291.731	17.1597	33.901	114.264
	ENSG00000083642	PDS5B	29.4143	15.0073	30.0325	24.818		ENSG00000084073	ZMPSTE24	23.0566	13.7422	11.0657	15.9548		ENSG00000084652	TXLNA	37.3169	346.429	26.3167	136.688		ENSG00000232442	MHENCR	16.0042	7.65251	319.126	114.261
	ENSG00000083720	OXCT1	15.8596	37.2763	3.7697	18.9685		ENSG00000084090	STARD7	101.501	9.31989	9.93828	40.253		ENSG00000084676	NCOA1	10.6825	5.84801	7.51793	8.01614		ENSG00000126759	CFP	19.637	302.696	20.3585	114.231
	ENSG00000083750	RRAGB	17.0333	4.51479	8.79947	10.1158		ENSG00000084092	NOA1	39.6252	11.9609	1071.52	374.369		ENSG00000084693	AGBL5	25.3532	42.2223	122.243	63.2729		ENSG00000196372	ASB13	35.9789	201.013	105.695	114.229
	ENSG00000083799	CYLD	13.9734	8.99836	1.98056	8.31744		ENSG00000084093	REST	13.968	1059.62	317.48	463.69		ENSG00000084731	KIF3C	8.17901	166.69	486.096	220.322		ENSG00000196365	LONP1	180.597	158.658	2.72476	113.993
	ENSG00000083807	SLC27A5	32.4592	1.36327	5.29211	13.0382		ENSG00000084110	HAL	10.3669	317.413	6.22609	111.335		ENSG00000084733	RAB10	113.655	36.4548	4.66657	51.5921		ENSG00000170502	NUDT9	11.7716	212.006	118.162	113.98
	ENSG00000083812	ZNF324	5.74369	4.38943	3148.16	1052.76		ENSG00000084112	SSH1	11.9563	5.95417	44.5847	20.8317		ENSG00000084754	HADHA	555.09	8.86735	76.0997	213.352		ENSG00000127022	CANX	216.215	110.119	15.0343	113.789
	ENSG00000083817	ZNF416	9.12247	3208.43	55.2684	1090.94		ENSG00000084207	GSTP1	1104.55	43.1186	163.682	437.116		ENSG00000084764	MAPRE3	6.77079	26.8781	96.6692	43.4394		ENSG00000079308	TNS1	3.60774	66.8184	270.702	113.709
	ENSG00000083828	ZNF586	1.50334	60.3098	46.9938	36.269		ENSG00000084234	APLP2	322.255	166.409	32.0822	173.582		ENSG00000084774	CAD	76.8578	6.89741	9.82663	31.194		ENSG00000164924	YWHAZ	321.272	15.2123	4.24342	113.576
	ENSG00000083838	ZNF446	5.49407	52.0442	67.0138	41.5174		ENSG00000084444	FAM234B	6.40989	31.4651	9.2224	15.6991		ENSG00000085117	CD82	89.8924	115.706	52.526	86.0416		ENSG00000128915	ICE2	11.5896	113.295	215.779	113.554
	ENSG00000083845	RPS5	3232.99	64.2834	31.8698	1109.71		ENSG00000084463	WBP11	43.5205	9.82184	22.5012	25.2812		ENSG00000085185	BCORL1	9.6438	507.697	48.5444	188.628		ENSG00000149136	SSRP1	255.601	70.5039	14.3907	113.498
	ENSG00000083896	YTHDC1	40.6336	24.3071	37.8642	34.2683		ENSG00000084623	EIF3I	158.782	23.8785	6.99089	63.2171		ENSG00000085224	ATRX	43.9432	5.62628	5.75323	18.4409		ENSG00000126934	MAP2K2	201.879	130.345	8.04229	113.422
	ENSG00000083937	CHMP2B	53.4022	32.6159	156.924	80.9808		ENSG00000084652	TXLNA	32.6563	8.96562	109.622	50.4145		ENSG00000085231	AK6	47.7385	73.4407	19.458	46.879		ENSG00000111897	SERINC1	64.3561	129.807	145.918	113.36
	ENSG00000084070	SMAP2	68.3225	151.786	52.7179	90.942		ENSG00000084676	NCOA1	10.1285	115.512	531.315	218.985		ENSG00000085274	MYNN	4.90177	101.808	17.0228	41.2442		ENSG00000197081	IGF2R	112.746	215.37	11.9221	113.346
	ENSG00000084072	PPIE	27.5941	52.567	20.4665	33.5425		ENSG00000084693	AGBL5	22.3779	544.855	6.48133	191.238		ENSG00000085365	SCAMP1	19.2509	7.89417	6.77752	11.3075		ENSG00000234851	RPL23AP42	335.839	2.21217	1.66796	113.24
	ENSG00000084073	ZMPSTE24	38.0545	19.0002	7.69923	21.5846		ENSG00000084731	KIF3C	8.84373	5.54603	69.9635	28.1177		ENSG00000085377	PREP	12.3503	42.2219	20.5415	25.0379		ENSG00000068028	RASSF1	151.49	50.3589	137.703	113.184
	ENSG00000084090	STARD7	158.034	8.54917	12.3825	59.6552		ENSG00000084733	RAB10	112.962	69.1199	92.6701	91.5839		ENSG00000085382	HACE1	7.02361	24.8531	11.7119	14.5295		ENSG00000178921	PFAS	26.4989	269.563	43.3588	113.14
	ENSG00000084092	NOA1	53.7743	12.2277	1326.56	464.186		ENSG00000084754	HADHA	473.374	83.9608	7.50872	188.281		ENSG00000085415	SEH1L	19.2525	4.61665	45.303	23.0574		ENSG00000070061	ELP1	13.1788	2.72385	323.283	113.062
	ENSG00000084093	REST	18.6956	1321.57	405.077	581.78		ENSG00000084764	MAPRE3	5.71663	7.35049	48.0077	20.3583		ENSG00000085433	WDR47	11.2474	19.0394	5.56896	11.9519		ENSG00000111775	COX6A1	315.674	13.2613	10.1426	113.026
	ENSG00000084110	HAL	7.96678	407.785	6.99711	140.916		ENSG00000084774	CAD	71.3791	50.683	33.3299	51.7973		ENSG00000085449	WDFY1	45.362	11.8878	27.6459	28.2986		ENSG00000173218	VANGL1	10.9115	281.732	45.5807	112.741
	ENSG00000084112	SSH1	10.6701	8.26866	58.8865	25.9418		ENSG00000085117	CD82	88.3391	60.4053	4.61946	51.1213		ENSG00000085465	OVGP1	8.89786	6.13477	24.4318	13.1548		ENSG00000004455	AK2	126.289	165.968	45.9008	112.719
	ENSG00000084207	GSTP1	1329.04	60.5594	202.824	530.808		ENSG00000085185	BCORL1	7.64358	4.37512	20.4883	10.8357		ENSG00000085491	SLC25A24	28.1113	19.8244	14.9834	20.973		ENSG00000172171	TEFM	16.0784	4.93714	316.693	112.57
	ENSG00000084234	APLP2	406.214	218.661	60.1229	228.333		ENSG00000085224	ATRX	48.0069	18.0515	12.5366	26.1983		ENSG00000085511	MAP3K4	29.1558	10.8437	10.6104	16.87		ENSG00000103363	ELOB	150.154	128.254	58.935	112.448
	ENSG00000084444	FAM234B	8.62816	61.6488	15.4602	28.5791		ENSG00000085231	AK6	54.3709	12.4439	5.79911	24.2046		ENSG00000085514	PILRA	18.0859	44.6275	21.9424	28.2186		ENSG00000139505	MTMR6	13.064	311.527	12.6218	112.404
	ENSG00000084463	WBP11	58.5863	15.368	37.0537	37.0027		ENSG00000085274	MYNN	4.1834	6.38141	20.5343	10.3664		ENSG00000085644	ZNF213	7.33164	8.11495	24.4466	13.2977		ENSG00000104671	DCTN6	42.5064	285.822	8.58438	112.304
	ENSG00000084623	EIF3I	210.804	44.8428	12.8498	89.4988		ENSG00000085365	SCAMP1	18.7	18.6298	11.6764	16.3354		ENSG00000085719	CPNE3	27.375	30.8435	45.3752	34.5313		ENSG00000108953	YWHAE	314.476	17.7806	4.61463	112.291
	ENSG00000084652	TXLNA	60.31	13.0532	165.625	79.6627		ENSG00000085377	PREP	11.0444	10.8861	42.5268	21.4858		ENSG00000085721	RRN3	29.7333	26.6019	24.9885	27.1079		ENSG00000065000	AP3D1	151.629	40.1169	144.879	112.208
	ENSG00000084676	NCOA1	16.0959	170.485	531.298	239.293		ENSG00000085382	HACE1	6.75387	41.6892	8.6664	19.0365		ENSG00000085760	MTIF2	45.0685	23.5273	24.3718	30.9892		ENSG00000130703	OSBPL2	25.7145	12.2311	298.302	112.083
	ENSG00000084693	AGBL5	34.1332	482.471	7.25155	174.619		ENSG00000085415	SEH1L	19.3738	9.66037	18.3008	15.7783		ENSG00000085788	DDHD2	29.8407	7.97544	30.8287	22.8816		ENSG00000092621	PHGDH	256.85	10.5913	68.787	112.076
	ENSG00000084731	KIF3C	9.90827	7.53855	93.4142	36.9537		ENSG00000085433	WDR47	10.4243	29.3519	28.0986	22.6249		ENSG00000085832	EPS15	25.6908	23.4372	73.1236	40.7505		ENSG00000213977	TAX1BP3	12.6131	157.588	165.983	112.061
	ENSG00000084733	RAB10	167.261	95.6013	80.3613	114.408		ENSG00000085449	WDFY1	39.5285	28.919	21.1853	29.8776		ENSG00000085840	ORC1	29.1356	23.7826	49.5116	34.1433		ENSG00000077097	TOP2B	166.216	121.493	48.3948	112.035
	ENSG00000084754	HADHA	521.297	79.1665	8.70443	203.056		ENSG00000085465	OVGP1	8.72148	20.1544	8.80948	12.5618		ENSG00000085871	MGST2	64.4964	44.754	18.0226	42.4243		ENSG00000251537	-	1.55872	324.318	9.25654	111.711
	ENSG00000084764	MAPRE3	6.77542	8.3121	49.673	21.5868		ENSG00000085491	SLC25A24	19.5751	8.8952	22.9603	17.1435		ENSG00000085872	CHERP	50.9558	26.8188	17.8986	31.891		ENSG00000100591	AHSA1	157.675	7.67413	169.404	111.584
	ENSG00000084774	CAD	96.3722	53.5519	79.5644	76.4961		ENSG00000085511	MAP3K4	27.0359	26.575	24.667	26.0926		ENSG00000085978	ATG16L1	17.6375	21.8287	14.2201	17.8954		ENSG00000110958	PTGES3	261.08	33.0264	40.6251	111.577
	ENSG00000085117	CD82	83.8839	75.5297	8.63214	56.0153		ENSG00000085514	PILRA	16.9248	25.2825	49.3356	30.5143		ENSG00000085982	USP40	18.7706	22.5495	19.0575	20.1259		ENSG00000075568	TMEM131	39.7756	280.559	14.3129	111.549
	ENSG00000085185	BCORL1	7.91536	7.4145	26.3952	13.9084		ENSG00000085644	ZNF213	8.50153	48.7841	23.047	26.7775		ENSG00000085998	POMGNT1	12.1045	95.0262	23.1355	43.4221		ENSG00000196290	NIF3L1	21.3972	29.3005	283.726	111.475
	ENSG00000085224	ATRX	51.0484	25.721	20.4218	32.3971		ENSG00000085719	CPNE3	24.316	28.3762	24.6579	25.7834		ENSG00000085999	RAD54L	17.8803	34.831	125.313	59.3415		ENSG00000187840	EIF4EBP1	324.017	2.61322	7.76761	111.466
	ENSG00000085231	AK6	51.1375	20.0011	9.65084	26.9298		ENSG00000085721	RRN3	23.7355	24.1919	27.247	25.0581		ENSG00000086015	MAST2	28.4547	16.9068	36.5786	27.3134		ENSG00000137845	ADAM10	18.5769	144.641	171.048	111.422
	ENSG00000085274	MYNN	6.94926	7.42077	35.6011	16.657		ENSG00000085760	MTIF2	48.9904	20.3465	55.1585	41.4985		ENSG00000086061	DNAJA1	118.605	27.655	49.5695	65.2765		ENSG00000115760	BIRC6	36.1347	153.509	144.172	111.272
	ENSG00000085365	SCAMP1	25.6602	39.2481	13.4159	26.108		ENSG00000085788	DDHD2	26.1492	81.9375	48.6126	52.2331		ENSG00000086062	B4GALT1	39.8298	16.2905	25.2758	27.1321		ENSG00000060558	GNA15	55.9243	229.961	47.153	111.013
	ENSG00000085377	PREP	19.0518	13.1939	65.4122	32.5527		ENSG00000085832	EPS15	22.5747	49.7144	17.6632	29.9841		ENSG00000086065	CHMP5	53.6111	18.9703	12.5857	28.389		ENSG00000123136	DDX39A	266.071	46.1313	20.7883	110.997
	ENSG00000085382	HACE1	8.93898	65.1511	4.00141	26.0305		ENSG00000085840	ORC1	24.7146	16.8791	20.3344	20.6427		ENSG00000086102	NFX1	28.5915	25.0608	6.39683	20.0164		ENSG00000187952	HS6ST1P1	2.1176	320.094	10.6744	110.962
	ENSG00000085415	SEH1L	34.3426	4.29956	26.6385	21.7602		ENSG00000085871	MGST2	80.304	20.0831	13.6013	37.9961		ENSG00000086189	DIMT1	12.1473	125.709	58.9089	65.5884		ENSG00000281538	-	2.4056	1.96744	328.504	110.959
	ENSG00000085433	WDR47	12.0665	24.4865	40.732	25.7617		ENSG00000085872	CHERP	48.1912	13.0178	19.4367	26.8819		ENSG00000086200	IPO11	7.06404	37.0438	53.8025	32.6368		ENSG00000169599	NFU1	63.1878	8.75039	260.454	110.797
	ENSG00000085449	WDFY1	64.7848	38.6896	20.4165	41.2969		ENSG00000085978	ATG16L1	16.232	20.5778	26.3211	21.0436		ENSG00000086232	EIF2AK1	60.1233	48.8384	15.7838	41.5818		ENSG00000134248	LAMTOR5	162.669	29.6593	139.994	110.774
	ENSG00000085465	OVGP1	4.72898	19.3927	16.0487	13.3901		ENSG00000085982	USP40	18.2704	25.7815	130.389	58.1469		ENSG00000086288	NME8	2.88986	28.9097	36.1527	22.6508		ENSG00000126709	IFI6	68.075	237.821	26.1692	110.688
	ENSG00000085491	SLC25A24	27.9323	16.3348	35.7833	26.6835		ENSG00000085998	POMGNT1	12.7162	141.228	36.2604	63.4016		ENSG00000086289	EPDR1	47.7728	11.886	35.2791	31.646		ENSG00000178202	POGLUT3	19.9937	60.8938	250.949	110.612
	ENSG00000085511	MAP3K4	39.8836	35.8188	40.7946	38.8323		ENSG00000085999	RAD54L	19.2284	36.2467	50.8627	35.4459		ENSG00000086300	SNX10	14.5521	7.22264	9.86354	10.5461		ENSG00000172260	NEGR1	4.38626	304.691	22.6737	110.584
	ENSG00000085514	PILRA	20.3745	39.6669	70.7157	43.5857		ENSG00000086015	MAST2	25.8735	49.8613	27.9252	34.5533		ENSG00000086475	SEPHS1	35.7956	62.571	56.5695	51.6454		ENSG00000137871	ZNF280D	14.2799	310.395	6.67284	110.449
	ENSG00000085644	ZNF213	17.8618	76.7015	35.9109	43.4914		ENSG00000086061	DNAJA1	139.933	27.4246	11.5581	59.6385		ENSG00000086504	MRPL28	46.4904	2.42922	102.118	50.346		ENSG00000168066	SF1	194.297	123.424	13.5793	110.433
	ENSG00000085719	CPNE3	34.243	36.3295	33.158	34.5769		ENSG00000086062	B4GALT1	36.5007	11.5621	5.68536	17.9161		ENSG00000086544	ITPKC	9.19716	54.2563	6.60647	23.3533		ENSG00000171310	CHST11	26.9197	271.012	33.0504	110.327
	ENSG00000085721	RRN3	40.1589	33.6238	43.9701	39.2509		ENSG00000086065	CHMP5	48.4754	6.99172	62.1153	39.1942		ENSG00000086589	RBM22	50.7105	13.8586	38.0533	34.2075		ENSG00000128463	EMC4	93.0248	54.1759	183.776	110.326
	ENSG00000085760	MTIF2	73.3528	44.8774	89.6314	69.2872		ENSG00000086102	NFX1	26.2657	63.0524	1.80756	30.3752		ENSG00000086598	TMED2	95.3964	38.2141	21.5761	51.7288		ENSG00000104870	FCGRT	250.898	1.80628	78.1816	110.295
	ENSG00000085788	DDHD2	38.6865	80.5137	60.4072	59.8691		ENSG00000086189	DIMT1	9.58372	2.16744	52.6238	21.4583		ENSG00000086619	ERO1B	5.51725	41.3283	469.52	172.122		ENSG00000172977	KAT5	20.2245	273.362	37.2421	110.276
	ENSG00000085832	EPS15	32.488	56.96	22.6953	37.3811		ENSG00000086200	IPO11	6.28765	55.3591	13.2343	24.9603		ENSG00000086666	ZFAND6	40.1877	9.00814	72.0733	40.423		ENSG00000163125	RPRD2	17.2422	278.488	34.9452	110.225
	ENSG00000085840	ORC1	41.9087	25.2224	21.8503	29.6605		ENSG00000086232	EIF2AK1	63.2454	13.4146	32.7756	36.4786		ENSG00000086712	TXLNG	24.2122	46.2619	13.0615	27.8452		ENSG00000130826	DKC1	96.5555	3.2986	230.622	110.159
	ENSG00000085871	MGST2	65.2867	17.624	17.6834	33.5314		ENSG00000086288	NME8	1.59352	34.5229	36.5262	24.2142		ENSG00000086730	LAT2	467.975	111.505	16.4126	198.631		ENSG00000173915	ATP5MK	311.919	6.24058	12.1214	110.094
	ENSG00000085872	CHERP	65.7176	18.7407	28.1128	37.5237		ENSG00000086289	EPDR1	49.7329	36.3313	9.7686	31.9443		ENSG00000086758	HUWE1	76.2574	6.77428	11.2741	31.4353		ENSG00000129158	SERGEF	74.7883	9.43459	246.002	110.075
	ENSG00000085978	ATG16L1	19.169	36.8481	25.8221	27.2797		ENSG00000086300	SNX10	13.9456	9.71026	54.0546	25.9035		ENSG00000086827	ZW10	11.524	39.5229	8.54894	19.8653		ENSG00000204165	CXorf65	6.1774	178.483	145.364	110.008
	ENSG00000085982	USP40	23.3449	25.5669	110.489	53.1337		ENSG00000086475	SEPHS1	34.1803	67.4539	92.6491	64.7611		ENSG00000086848	ALG9	9.32766	21.775	236.9	89.3344		ENSG00000126756	UXT	237.77	2.12707	90.0651	109.987
	ENSG00000085998	POMGNT1	18.1908	109.699	52.5607	60.1501		ENSG00000086504	MRPL28	37.2423	96.7013	5.75188	46.5652		ENSG00000087008	ACOX3	10.6716	448.839	20.5583	160.023		ENSG00000160113	NR2F6	14.8234	47.0421	268.037	109.968
	ENSG00000085999	RAD54L	32.3992	51.8937	61.6331	48.642		ENSG00000086544	ITPKC	9.86126	6.08535	39.8735	18.6067		ENSG00000087053	MTMR2	7.53539	76.7904	8.36831	30.898		ENSG00000100365	NCF4	252.652	48.275	28.9702	109.966
	ENSG00000086015	MAST2	26.3063	61.2806	35.6574	41.0814		ENSG00000086589	RBM22	50.051	40.0762	24.069	38.0654		ENSG00000087074	PPP1R15A	218.5	10.1523	10825.5	3684.71		ENSG00000106367	AP1S1	162.84	128.185	38.6126	109.879
	ENSG00000086061	DNAJA1	104.609	33.0638	20.9082	52.8603		ENSG00000086598	TMED2	93.7915	24.2873	446.201	188.093		ENSG00000087076	HSD17B14	19.1876	13.263	234.368	88.9395		ENSG00000162191	UBXN1	226.7	32.1683	70.7626	109.877
	ENSG00000086062	B4GALT1	51.8474	22.688	12.4183	28.9846		ENSG00000086619	ERO1B	5.92687	453.172	69.7741	176.291		ENSG00000087077	TRIP6	5.53049	7.83872	114.829	42.7329		ENSG00000106948	AKNA	25.9329	300.577	2.98708	109.832
	ENSG00000086065	CHMP5	60.6722	13.3127	76.4208	50.1352		ENSG00000086666	ZFAND6	38.6139	70.7215	14.6907	41.342		ENSG00000087086	FTL	10872.9	8.32952	12.0465	3631.1		ENSG00000126264	HCST	83.1841	167.74	78.4859	109.803
	ENSG00000086102	NFX1	33.5157	76.8941	60.3347	56.9148		ENSG00000086712	TXLNG	23.271	11.5258	14.1727	16.3232		ENSG00000087087	SRRT	245.207	213.614	34.24	164.354		ENSG00000125898	FAM110A	22.563	32.747	274.094	109.801
	ENSG00000086189	DIMT1	22.1024	57.8797	19.6195	33.2005		ENSG00000086730	LAT2	450.024	13.161	7.64576	156.944		ENSG00000087088	BAX	109.689	25.6897	46.8367	60.7383		ENSG00000159685	CHCHD6	33.7839	283.488	12.1322	109.801
	ENSG00000086200	IPO11	13.1562	18.5651	43.9931	25.2381		ENSG00000086758	HUWE1	75.9214	7.04551	7.97538	30.3141		ENSG00000087095	NLK	12.0415	5.69252	27.505	15.0797		ENSG00000104899	AMH	4.07782	169.899	154.767	109.581
	ENSG00000086232	EIF2AK1	76.629	43.2322	42.2535	54.0382		ENSG00000086827	ZW10	13.6178	8.08482	188.998	70.2336		ENSG00000087111	PIGS	34.9759	11271.8	92.3314	3799.69		ENSG00000147274	RBMX	248.126	34.1617	46.4437	109.577
	ENSG00000086289	EPDR1	62.0303	59.4197	11.785	44.4117		ENSG00000086848	ALG9	11.9646	218.659	19.5359	83.3865		ENSG00000087152	ATXN7L3	46.0752	234.71	41.5996	107.462		ENSG00000103490	PYCARD	123.19	137.991	67.0733	109.418
	ENSG00000086300	SNX10	19.0603	12.6701	66.3693	32.6999		ENSG00000087008	ACOX3	7.20516	19.0516	6.23042	10.829		ENSG00000087157	PGS1	27.9885	97.6145	6.9905	44.1979		ENSG00000130707	ASS1	285.088	13.2712	29.5303	109.297
	ENSG00000086475	SEPHS1	43.8063	44.2393	119.42	69.155		ENSG00000087053	MTMR2	8.31321	5.22616	10747.6	3587.03		ENSG00000087191	PSMC5	97.4602	11.8187	24.6078	44.6289		ENSG00000023892	DEF6	97.2882	115.778	114.081	109.049
	ENSG00000086504	MRPL28	53.4414	124.474	7.58011	61.8319		ENSG00000087074	PPP1R15A	83.9888	10599.7	254.997	3646.22		ENSG00000087206	UIMC1	52.5924	30.3394	16.6611	33.1977		ENSG00000071794	HLTF	36.2135	135.063	155.521	108.932
	ENSG00000086544	ITPKC	11.752	7.36098	53.2986	24.1372		ENSG00000087076	HSD17B14	17.0513	243.347	93.0984	117.832		ENSG00000087245	MMP2	8.07215	49.3842	56.0657	37.8407		ENSG00000010671	BTK	49.1252	18.2456	258.944	108.772
	ENSG00000086589	RBM22	61.3849	54.3234	37.445	51.0511		ENSG00000087077	TRIP6	4.99739	85.9304	11.3027	34.0768		ENSG00000087253	LPCAT2	26.4734	24.4753	74.2811	41.7432		ENSG00000182196	ARL6IP4	211.917	51.0585	63.3338	108.77
	ENSG00000086598	TMED2	120.88	37.586	393.708	184.058		ENSG00000087086	FTL	11768.8	10.9865	31.0893	3936.95		ENSG00000087263	OGFOD1	15.4396	92.1312	112.125	73.232		ENSG00000241352	-	4.7848	317.649	2.89825	108.444
	ENSG00000086619	ERO1B	6.92337	401.509	97.7635	168.732		ENSG00000087087	SRRT	244.194	30.0325	40.8704	105.032		ENSG00000087266	SH3BP2	50.0615	45.6541	3.6074	33.1077		ENSG00000075292	ZNF638	73.493	41.4262	210.223	108.381
	ENSG00000086666	ZFAND6	50.1481	101.559	20.4263	57.3778		ENSG00000087088	BAX	86.3172	43.9267	22.9075	51.0505		ENSG00000087269	NOP14	74.7618	7.2592	7.05339	29.6915		ENSG00000101199	ARFGAP1	64.2915	14.2297	246.457	108.326
	ENSG00000086712	TXLNG	35.7714	19.5532	18.1089	24.4778		ENSG00000087095	NLK	10.4807	22.5044	89.9575	40.9808		ENSG00000087274	ADD1	132.508	23.7542	36.5795	64.2804		ENSG00000149636	DSN1	30.5879	133.946	160.182	108.239
	ENSG00000086730	LAT2	387.945	14.2125	17.289	139.816		ENSG00000087111	PIGS	29.5085	88.3062	46.1043	54.6397		ENSG00000087299	L2HGDH	3.22886	14.1554	23.861	13.7484		ENSG00000004478	FKBP4	137.324	3.70563	183.055	108.028
	ENSG00000086758	HUWE1	101.616	16.4616	12.9655	43.6811		ENSG00000087152	ATXN7L3	42.3956	44.3458	7.71008	31.4838		ENSG00000087301	TXNDC16	6.94884	50.8803	204.12	87.3164		ENSG00000065518	NDUFB4	280.412	26.8978	16.6999	108.003
	ENSG00000086827	ZW10	19.4234	15.1819	355.362	129.989		ENSG00000087157	PGS1	24.2686	7.75721	25.1051	19.0436		ENSG00000087302	RTRAF	57.8996	72.3064	7.65678	45.9543		ENSG00000104866	PPP1R37	26.3492	115.062	182.564	107.992
	ENSG00000086848	ALG9	18.637	369.229	17.1622	135.009		ENSG00000087191	PSMC5	90.086	29.3111	14.7876	44.7282		ENSG00000087338	GMCL1	18.4618	78.1774	575.971	224.204		ENSG00000074695	LMAN1	54.5186	129.51	139.768	107.932
	ENSG00000087008	ACOX3	18.8254	17.7641	3.82278	13.4707		ENSG00000087206	UIMC1	42.5315	14.1466	43.1167	33.2649		ENSG00000087365	SF3B2	229.192	3.7308	37.6584	90.1938		ENSG00000197362	ZNF786	2.48454	312.168	8.89123	107.848
	ENSG00000087053	MTMR2	12.9853	3.31156	10400.8	3472.37		ENSG00000087245	MMP2	7.27101	46.5277	71.7199	41.8395		ENSG00000087448	KLHL42	10.2127	6.57691	2.92086	6.57017		ENSG00000107223	EDF1	311.101	2.18125	9.93387	107.739
	ENSG00000087074	PPP1R15A	372.364	11271.4	223.473	3955.74		ENSG00000087253	LPCAT2	25.6711	69.8564	115.032	70.1866		ENSG00000087460	GNAS	648.663	43.2064	10.7552	234.208		ENSG00000004534	RBM6	128.966	54.7648	138.668	107.466
	ENSG00000087076	HSD17B14	15.3518	231.877	92.6004	113.276		ENSG00000087263	OGFOD1	14.6088	118.668	3.65905	45.6451		ENSG00000087470	DNM1L	41.322	21.3182	15.89	26.1767		ENSG00000130513	GDF15	23.7786	284.575	13.5318	107.295
	ENSG00000087077	TRIP6	3.53322	102.029	13.2433	39.602		ENSG00000087266	SH3BP2	47.8718	3.12716	7.72197	19.5737		ENSG00000087494	PTHLH	1.59593	177.664	70.3627	83.2075		ENSG00000171202	TMEM126A	48.7728	2.62998	270.469	107.291
	ENSG00000087086	FTL	11015.2	12.4617	42.8907	3690.17		ENSG00000087269	NOP14	78.1931	7.29887	56.1198	47.2039		ENSG00000087495	PHACTR3	10.3894	11.8506	39.8324	20.6908		ENSG00000099337	KCNK6	27.241	84.7379	209.883	107.287
	ENSG00000087087	SRRT	227.469	44.0247	60.3285	110.607		ENSG00000087274	ADD1	77.4874	48.0626	24.0707	49.8736		ENSG00000087502	ERGIC2	15.2421	467.514	23.3378	168.698		ENSG00000065526	SPEN	21.9337	15.0871	284.159	107.06
	ENSG00000087088	BAX	107.747	61.4657	24.0221	64.4117		ENSG00000087299	L2HGDH	4.24521	23.0436	190.497	72.5952		ENSG00000087586	AURKA	80.6245	42.4125	18.021	47.0193		ENSG00000134686	PHC2	41.7839	132.98	146.386	107.05
	ENSG00000087095	NLK	12.8761	25.2305	121.381	53.1625		ENSG00000087301	TXNDC16	6.70872	191.395	9.17913	69.0943		ENSG00000087842	PIR	56.7	1.66217	7.60689	21.9897		ENSG00000273820	USP27X	5.4702	9.97514	305.318	106.921
	ENSG00000087111	PIGS	44.4274	136.622	35.5502	72.1998		ENSG00000087302	RTRAF	41.9149	11.8558	615.626	223.132		ENSG00000087884	AAMDC	18.2981	9.20566	1.23529	9.57969		ENSG00000154153	RETREG1	29.2321	281.415	10.0146	106.887
	ENSG00000087152	ATXN7L3	59.2271	41.2147	7.81983	36.0872		ENSG00000087338	GMCL1	23.2587	442.271	39.0577	168.196		ENSG00000087903	RFX2	17.1666	15.7676	3.37401	12.1027		ENSG00000100902	PSMA6	155.778	137.1	27.434	106.771
	ENSG00000087157	PGS1	25.3372	7.27194	37.951	23.5201		ENSG00000087365	SF3B2	188.361	39.5956	1.33844	76.4318		ENSG00000087995	METTL2A	9.43796	80.3239	69.1036	52.9551		ENSG00000100380	ST13	235.487	60.3013	24.4499	106.746
	ENSG00000087191	PSMC5	123.689	38.587	25.179	62.485		ENSG00000087448	KLHL42	10.3111	1.93138	8.44137	6.8946		ENSG00000088002	SULT2B1	1.47306	44.2243	4.15748	16.6183		ENSG00000143570	SLC39A1	107.383	92.901	119.581	106.622
	ENSG00000087206	UIMC1	37.344	24.888	59.2662	40.4994		ENSG00000087460	GNAS	440.425	8.47699	15.6031	154.835		ENSG00000088035	ALG6	2.51544	18.4132	54.8817	25.2701		ENSG00000146066	HIGD2A	193.098	33.04	93.5693	106.569
	ENSG00000087245	MMP2	7.25024	61.1385	122.817	63.7351		ENSG00000087470	DNM1L	39.9803	18.2007	74.2164	44.1325		ENSG00000088038	CNOT3	57.0417	17.0475	121.598	65.229		ENSG00000204386	NEU1	47.7072	250.072	21.8915	106.557
	ENSG00000087253	LPCAT2	36.233	120.601	132.774	96.5361		ENSG00000087494	PTHLH	1.74112	79.3974	1.28509	27.4745		ENSG00000088179	PTPN4	4.40664	7.8152	60.4138	24.2119		ENSG00000099326	MZF1	14.4838	38.5938	266.591	106.556
	ENSG00000087263	OGFOD1	23.6627	139.979	7.79771	57.1466		ENSG00000087495	PHACTR3	9.16826	1.4112	48.4226	19.6674		ENSG00000088205	DDX18	62.7208	1.3693	13.1075	25.7325		ENSG00000105404	RABAC1	72.9425	20.6721	225.642	106.419
	ENSG00000087266	SH3BP2	61.3266	8.28227	8.39598	26.0016		ENSG00000087502	ERGIC2	13.7769	47.4471	17.994	26.406		ENSG00000088247	KHSRP	116.007	2.29283	342.392	153.564		ENSG00000004468	CD38	5.23041	175.378	138.628	106.412
	ENSG00000087269	NOP14	120.96	7.71232	54.6428	61.105		ENSG00000087586	AURKA	76.1595	22.791	14.4353	37.7953		ENSG00000088298	EDEM2	63.0245	64.7708	77.5724	68.4559		ENSG00000165637	VDAC2	240.356	42.9745	35.5818	106.304
	ENSG00000087274	ADD1	131.898	61.6463	32.2152	75.2533		ENSG00000087589	CASS4	1.18993	15.5182	9.52904	8.74574		ENSG00000088305	DNMT3B	10.679	3.69109	155.536	56.6355		ENSG00000134690	CDCA8	59.5886	169.534	89.6597	106.261
	ENSG00000087299	L2HGDH	5.864	32.0601	213.408	83.7773		ENSG00000087842	PIR	53.4523	10.1403	2.43463	22.0091		ENSG00000088325	TPX2	368.3	62.7935	25.7479	152.28		ENSG00000178694	NSUN3	7.93885	238.592	72.1381	106.223
	ENSG00000087301	TXNDC16	7.56553	211.135	15.7946	78.1652		ENSG00000087884	AAMDC	18.4015	3.59383	57.8029	26.5994		ENSG00000088356	PDRG1	86.9005	114.705	2.33419	67.9798		ENSG00000119321	FKBP15	12.3068	121.669	184.553	106.176
	ENSG00000087302	RTRAF	62.2135	15.8562	506.037	194.702		ENSG00000087903	RFX2	16.1232	58.5475	4.46007	26.3769		ENSG00000088448	ANKRD10	172.808	70.1907	11.0132	84.6706		ENSG00000185049	NELFA	70.5686	67.8108	179.974	106.118
	ENSG00000087338	GMCL1	34.2505	498.356	57.4901	196.699		ENSG00000087995	METTL2A	8.62098	6.22159	61.2258	25.3561		ENSG00000088451	TGDS	27.9077	12.655	50.6273	30.3967		ENSG00000106028	SSBP1	131.544	44.933	141.626	106.034
	ENSG00000087365	SF3B2	252.019	56.7676	1.31616	103.368		ENSG00000088035	ALG6	3.65165	63.3637	102.467	56.4941		ENSG00000088538	DOCK3	2.17857	343.342	6.87003	117.463		ENSG00000128731	HERC2	50.0513	213.953	54.0737	106.026
	ENSG00000087448	KLHL42	15.8717	15.965	15.251	15.6959		ENSG00000088038	CNOT3	60.3054	129.277	62.2359	83.9396		ENSG00000088543	C3orf18	10.6399	75.4231	26.4438	37.5023		ENSG00000086758	HUWE1	68.7511	229.596	19.6943	106.014
	ENSG00000087460	GNAS	502.962	20.5896	21.3982	181.65		ENSG00000088179	PTPN4	5.03445	61.6027	12.1878	26.275		ENSG00000088682	COQ9	48.7362	166.585	6.31676	73.8795		ENSG00000182054	IDH2	108.603	206.64	2.19269	105.812
	ENSG00000087470	DNM1L	58.484	98.8787	100.082	85.8148		ENSG00000088205	DDX18	64.7679	14.0332	351.88	143.56		ENSG00000088727	KIF9	12.3144	29.1553	20.859	20.7763		ENSG00000078369	GNB1	186.768	3.79416	126.785	105.783
	ENSG00000087494	PTHLH	1.39786	25.8236	24.3969	17.2061		ENSG00000088247	KHSRP	109.483	363.559	72.8424	181.961		ENSG00000088766	CRLS1	20.5973	2.05687	13.6901	12.1148		ENSG00000121892	PDS5A	85.565	56.3532	174.968	105.629
	ENSG00000087495	PHACTR3	15.5926	16.8028	13.0387	15.1447		ENSG00000088298	EDEM2	60.0548	74.4347	161.764	98.751		ENSG00000088808	PPP1R13B	7.68889	15.9162	212.134	78.5796		ENSG00000010610	CD4	300.883	8.64843	7.33808	105.623
	ENSG00000087502	ERGIC2	21.0029	17.6273	19.5955	19.4086		ENSG00000088305	DNMT3B	9.92824	166.18	26.4491	67.5191		ENSG00000088812	ATRN	19.8943	49.4821	90.6295	53.3353		ENSG00000105438	KDELR1	302.299	1.86315	12.6353	105.599
	ENSG00000087586	AURKA	102.061	13.5258	12.6344	42.7402		ENSG00000088325	TPX2	346.863	28.4341	2.5948	125.964		ENSG00000088826	SMOX	16.8518	12.3247	5.56382	11.5801		ENSG00000162032	SPSB3	46.386	265.689	4.53705	105.537
	ENSG00000087842	PIR	24.9109	1.01631	1.58077	9.16932		ENSG00000088356	PDRG1	71.8643	2.36106	8.95636	27.7272		ENSG00000088832	FKBP1A	213.27	15.5336	9.54998	79.4511		ENSG00000156860	FBRS	64.806	2.10135	249.637	105.515
	ENSG00000087884	AAMDC	19.063	5.58572	4.61959	9.7561		ENSG00000088448	ANKRD10	170.5	8.42582	47.7175	75.5479		ENSG00000088833	NSFL1C	65.3564	6.16444	2.76	24.7603		ENSG00000169813	HNRNPF	229.718	6.36186	79.4467	105.176
	ENSG00000087903	RFX2	19.7451	95.1952	92.9502	69.2968		ENSG00000088451	TGDS	29.3101	50.5103	10.8388	30.2197		ENSG00000088836	SLC4A11	1.40135	19.046	43.8362	21.4278		ENSG00000213593	TMX2	82.2054	120.872	112.224	105.101
	ENSG00000087995	METTL2A	12.967	5.68031	5.9981	8.21515		ENSG00000088538	DOCK3	2.51399	9.59292	22.0889	11.3986		ENSG00000088854	DNAAF9	6.12795	12.7528	2.66087	7.18053		ENSG00000065559	MAP2K4	11.2227	156.141	147.883	105.082
	ENSG00000088035	ALG6	4.97288	93.7705	93.0643	63.9359		ENSG00000088543	C3orf18	11.6535	17.3378	3.98856	10.9933		ENSG00000088876	ZNF343	9.67644	216.955	56.4334	94.3549		ENSG00000156802	ATAD2	47.6748	243.111	24.3521	105.046
	ENSG00000088038	CNOT3	100.181	167.369	172.685	146.745		ENSG00000088682	COQ9	49.5256	2.86283	19.1092	23.8325		ENSG00000088881	EBF4	2.19274	68.1174	22.2272	30.8458		ENSG00000136144	RCBTB1	44.624	14.2514	256.249	105.041
	ENSG00000088179	PTPN4	5.73701	59.547	1.07846	22.1208		ENSG00000088727	KIF9	12.4333	19.9027	10.5696	14.3019		ENSG00000088888	MAVS	43.1179	2.03682	182.974	76.0431		ENSG00000122257	RBBP6	66.2151	245.132	3.53858	104.962
	ENSG00000088205	DDX18	92.5668	18.9232	58.165	56.5517		ENSG00000088766	CRLS1	18.6559	10.8411	204.114	77.8703		ENSG00000088899	LZTS3	3.01991	5.94897	129.922	46.2969		ENSG00000144028	SNRNP200	142.703	30.3626	141.755	104.94
	ENSG00000088247	KHSRP	182.983	475.142	16.9393	225.021		ENSG00000088808	PPP1R13B	3.08093	194.167	59.0666	85.4381		ENSG00000088930	XRN2	56.707	10.6328	65.1563	44.1654		ENSG00000138668	HNRNPD	244.422	41.4434	28.629	104.831
	ENSG00000088280	ASAP3	1.21812	98.1052	470.733	190.019		ENSG00000088812	ATRN	19.7055	56.6479	5.74792	27.3671		ENSG00000088970	KIZ	22.8126	2.55062	4257.97	1427.78		ENSG00000112742	TTK	17.9418	232.824	63.6338	104.8
	ENSG00000088298	EDEM2	57.8507	2.68141	97.5981	52.7101		ENSG00000088826	SMOX	12.2674	5.5772	8.43379	8.75945		ENSG00000088986	DYNLL1	201.376	1.28228	17.5715	73.4099		ENSG00000142347	MYO1F	254.98	42.223	17.1724	104.792
	ENSG00000088305	DNMT3B	20.564	192.332	2.69064	71.8621		ENSG00000088832	FKBP1A	201.429	10.325	2.2444	71.3328		ENSG00000088992	TESC	122.134	35.1023	30.6771	62.6379		ENSG00000100767	PAPLN	3.00985	282.478	28.5171	104.668
	ENSG00000088325	TPX2	468.385	42.3957	188.91	233.23		ENSG00000088833	NSFL1C	68.8372	1.77067	42.0759	37.5612		ENSG00000089006	SNX5	57.5128	2.378	32.5795	30.8234		ENSG00000020129	NCDN	7.96018	169.37	136.569	104.633
	ENSG00000088356	PDRG1	96.1545	3.53855	42.0329	47.242		ENSG00000088854	DNAAF9	5.88666	42.4928	3.32424	17.2346		ENSG00000089009	RPL6	4310.58	57.1422	3.11378	1456.95		ENSG00000131876	SNRPA1	86.4916	190.985	36.2699	104.582
	ENSG00000088387	DOCK9	2.23976	12.5187	3.39181	6.05009		ENSG00000088876	ZNF343	8.33987	3.37901	59.4544	23.7244		ENSG00000089022	MAPKAPK5	14.0225	23.5312	63.2634	33.6057		ENSG00000126456	IRF3	89.1877	51.4258	172.977	104.53
	ENSG00000088448	ANKRD10	195.728	56.2042	14.8575	88.93		ENSG00000088881	EBF4	2.70695	61.4639	22.8988	29.0232		ENSG00000089041	P2RX7	36.052	223.723	21.7358	93.837		ENSG00000140319	SRP14	278.821	17.7268	16.8863	104.478
	ENSG00000088451	TGDS	41.4283	20.9166	62.5266	41.6239		ENSG00000088888	MAVS	42.8903	22.4239	199.68	88.3314		ENSG00000089048	ESF1	34.3369	185.141	19.09	79.5226		ENSG00000104859	CLASRP	147.986	111.85	53.2982	104.378
	ENSG00000088538	DOCK3	3.8327	22.7841	17.4216	14.6795		ENSG00000088899	LZTS3	2.79446	187.879	154.079	114.918		ENSG00000089050	RBBP9	1.98578	60.1483	76.291	46.1417		ENSG00000099381	SETD1A	34.9076	198.107	79.993	104.336
	ENSG00000088543	C3orf18	13.8494	4.51698	25.7176	14.6947		ENSG00000088930	XRN2	60.3398	142.019	66.8099	89.7229		ENSG00000089053	ANAPC5	83.3424	4388.25	2.93553	1491.51		ENSG00000122873	CISD1	6.50605	263.668	42.7389	104.304
	ENSG00000088682	COQ9	54.9096	28.2843	4.73537	29.3097		ENSG00000088970	KIZ	21.4566	77.4759	4387.2	1495.38		ENSG00000089057	SLC23A2	21.0872	14.8751	24.8912	20.2845		ENSG00000168385	SEPTIN2	55.5943	18.143	239.141	104.293
	ENSG00000088727	KIF9	18.7543	18.5917	25.5846	20.9768		ENSG00000088986	DYNLL1	176.12	4751.2	15.1881	1647.5		ENSG00000089060	SLC8B1	25.5009	28.4821	3.42846	19.1371		ENSG00000170144	HNRNPA3	164.685	5.5493	142.54	104.258
	ENSG00000088766	CRLS1	22.5493	291.852	18.3066	110.903		ENSG00000088992	TESC	115.033	14.7172	29.0451	52.9318		ENSG00000089063	TMEM230	82.2188	38.6755	3.49928	41.4645		ENSG00000160678	S100A1	2.69072	19.4048	290.527	104.208
	ENSG00000088808	PPP1R13B	3.89381	82.2746	310.808	132.325		ENSG00000089006	SNX5	67.2612	29.1802	40.1218	45.5211		ENSG00000089091	DZANK1	2.48502	3.63911	45.6969	17.2737		ENSG00000143368	SF3B4	78.8489	15.2112	218.39	104.15
	ENSG00000088812	ATRN	26.444	1.32072	94.6606	40.8084		ENSG00000089009	RPL6	4620.11	41.6808	3.52031	1555.1		ENSG00000089094	KDM2B	21.3548	78.4071	5746.25	1948.67		ENSG00000136238	RAC1	235.698	50.8783	25.6051	104.061
	ENSG00000088826	SMOX	19.3707	5.77235	1.78011	8.97439		ENSG00000089022	MAPKAPK5	15.0324	3.74151	78.2134	32.3291		ENSG00000089123	TASP1	3.92176	21.285	16.7662	13.991		ENSG00000130741	EIF2S3	245.889	45.0604	21.1249	104.025
	ENSG00000088832	FKBP1A	301.55	12.8136	5.66684	106.677		ENSG00000089041	P2RX7	28.7397	72.0988	23.4627	41.4338		ENSG00000089127	OAS1	5.36254	22.7408	5.15014	11.0845		ENSG00000159733	ZFYVE28	16.3908	2.59197	292.816	103.933
	ENSG00000088833	NSFL1C	76.453	3.15788	12.941	30.8506		ENSG00000089048	ESF1	42.4722	22.1307	21.9507	28.8512		ENSG00000089154	GCN1	49.9107	88.094	3.50238	47.169		ENSG00000111906	HDDC2	36.4012	141.871	133.521	103.931
	ENSG00000088836	SLC4A11	1.3443	59.3738	5.26182	21.9933		ENSG00000089050	RBBP9	2.87198	21.0853	77.8464	33.9346		ENSG00000089157	RPLP0	5899.1	2.0263	17.2446	1972.79		ENSG00000079277	MKNK1	21.1545	257.436	32.9676	103.853
	ENSG00000088854	DNAAF9	5.82851	2.30184	55.3651	21.1651		ENSG00000089053	ANAPC5	77.5688	82.4275	2.1555	54.0506		ENSG00000089159	PXN	20.2538	24.5654	222.513	89.1106		ENSG00000092098	RNF31	14.7204	23.8812	272.558	103.72
	ENSG00000088876	ZNF343	12.368	86.9029	2.17863	33.8165		ENSG00000089057	SLC23A2	23.6237	2.46225	26.0856	17.3905		ENSG00000089177	KIF16B	4.36896	3.51361	13.4853	7.12264		ENSG00000146830	GIGYF1	88.7595	30.593	191.581	103.645
	ENSG00000088881	EBF4	4.26399	33.5468	87.1686	41.6598		ENSG00000089060	SLC8B1	24.2673	25.4544	3.54555	17.7558		ENSG00000089195	TRMT6	20.1336	4.06727	220.654	81.6183		ENSG00000141959	PFKL	69.0562	80.967	160.695	103.573
	ENSG00000088882	CPXM1	1.40264	330.653	31.8573	121.304		ENSG00000089063	TMEM230	75.0117	2.58009	4.4523	27.348		ENSG00000089220	PEBP1	226.813	44.5364	502.694	258.015		ENSG00000187796	CARD9	23.9894	7.04579	279.606	103.547
	ENSG00000088888	MAVS	54.8161	164.479	326.902	182.066		ENSG00000089091	DZANK1	3.27988	5.86928	44.118	17.7557		ENSG00000089234	BRAP	13.0753	5920.65	153.445	2029.06		ENSG00000128266	GNAZ	1.67985	10.1501	298.801	103.544
	ENSG00000088899	LZTS3	2.23599	90.2582	166.098	86.1973		ENSG00000089094	KDM2B	23.3986	42.4478	5745.5	1937.12		ENSG00000089248	ERP29	213.453	21.4118	729.443	321.436		ENSG00000164713	BRI3	293.297	7.66896	9.24396	103.403
	ENSG00000088930	XRN2	86.5634	3295.81	98.4778	1160.28		ENSG00000089123	TASP1	3.0668	5704.11	18.4523	1908.54		ENSG00000089280	FUS	375.886	2.04843	10.1784	129.371		ENSG00000107833	NPM3	168.722	31.279	110.204	103.402
	ENSG00000088970	KIZ	32.3299	16.8906	3376.44	1141.89		ENSG00000089127	OAS1	4.23313	16.8253	1.65712	7.57187		ENSG00000089289	IGBP1	135.88	4.22739	57.9054	66.0044		ENSG00000148459	PDSS1	6.57615	235.751	67.4544	103.261
	ENSG00000088986	DYNLL1	319.806	41.7879	23.6605	128.418		ENSG00000089154	GCN1	42.1183	1.3355	4.22776	15.8938		ENSG00000089327	FXYD5	908.003	18.7329	18.3144	315.017		ENSG00000179918	SEPHS2	100.015	33.5284	176.175	103.239
	ENSG00000088992	TESC	183.327	46.6542	41.945	90.6422		ENSG00000089157	RPLP0	5737.86	4.70203	21.4214	1921.33		ENSG00000089335	ZNF302	9.14655	230.725	217.707	152.526		ENSG00000078304	PPP2R5C	65.5199	112.719	131.165	103.135
	ENSG00000089006	SNX5	85.9694	7.39962	47.1022	46.8237		ENSG00000089159	PXN	19.5106	23.2793	224.938	89.2426		ENSG00000089351	GRAMD1A	49.4631	12.2269	24.3723	28.6874		ENSG00000264281	-	283.211	23.229	2.83109	103.09
	ENSG00000089009	RPL6	3231.3	115.158	7.84676	1118.1		ENSG00000089163	SIRT4	2.06837	217.57	13.8345	77.8242		ENSG00000089486	CDIP1	16.0507	204.243	9.62593	76.64		ENSG00000271361	HTATSF1P2	7.24814	3.04238	298.778	103.023
	ENSG00000089022	MAPKAPK5	20.6056	27.4698	106.929	51.6682		ENSG00000089177	KIF16B	4.62899	13.3629	224.992	80.9947		ENSG00000089597	GANAB	215.847	482.595	48.5141	248.985		ENSG00000112578	BYSL	26.5793	255.567	26.7557	102.967
	ENSG00000089041	P2RX7	40.9502	28.999	29.5506	33.1666		ENSG00000089195	TRMT6	21.4404	225.863	529.409	258.904		ENSG00000089639	GMIP	21.1018	151.685	147.489	106.759		ENSG00000156858	PRR14	74.9935	204.956	28.9227	102.958
	ENSG00000089048	ESF1	44.8523	128.183	26.5743	66.5366		ENSG00000089220	PEBP1	221.549	530.459	151.583	301.197		ENSG00000089682	RBM41	8.70066	954.462	1.36086	321.508		ENSG00000146410	MTFR2	23.2135	255.549	29.9847	102.916
	ENSG00000089050	RBBP9	6.10078	5.80023	127.086	46.3292		ENSG00000089234	BRAP	14.7665	159.082	869.438	347.762		ENSG00000089685	BIRC5	51.6964	7.85536	63.294	40.9486		ENSG00000106266	SNX8	16.1334	282.335	10.2109	102.893
	ENSG00000089053	ANAPC5	104.905	30.6359	4.54263	46.6946		ENSG00000089248	ERP29	226.517	861.107	9.50492	365.71		ENSG00000089693	MLF2	145.714	59.2938	2.8337	69.2806		ENSG00000006576	PHTF2	18.5409	209.001	81.0538	102.865
	ENSG00000089057	SLC23A2	27.5638	3.7699	29.9854	20.4397		ENSG00000089280	FUS	522.876	8.55832	52.942	194.792		ENSG00000089723	OTUB2	2.08871	22.0706	8.66379	10.941		ENSG00000241837	ATP5PO	302.392	2.57043	3.28831	102.75
	ENSG00000089060	SLC8B1	25.5379	2.97403	4.57503	11.029		ENSG00000089289	IGBP1	158.917	50.5094	16.4779	75.3015		ENSG00000089737	DDX24	73.7299	230.296	75.4809	126.502		ENSG00000168918	INPP5D	220.428	76.0311	11.7147	102.725
	ENSG00000089063	TMEM230	124.934	54.821	2.75105	60.8354		ENSG00000089327	FXYD5	827.965	16.8394	208.358	351.054		ENSG00000089775	ZBTB25	1.8023	22.0311	7.75733	10.5303		ENSG00000132485	ZRANB2	65.0443	219.817	23.3081	102.723
	ENSG00000089091	DZANK1	5.57316	4567.11	48.5884	1540.43		ENSG00000089335	ZNF302	9.17009	209.173	17.1003	78.4811		ENSG00000089818	NECAP1	8.72138	8.19723	26.0433	14.3206		ENSG00000182199	SHMT2	267.888	32.3225	7.63941	102.617
	ENSG00000089094	KDM2B	32.0273	21.2529	4472.86	1508.71		ENSG00000089351	GRAMD1A	52.3821	17.1654	11.0157	26.8544		ENSG00000089820	ARHGAP4	61.5695	53.3692	16.657	43.8652		ENSG00000028310	BRD9	252.598	26.8533	28.3961	102.616
	ENSG00000089123	TASP1	3.85572	1.17351	21.6852	8.90482		ENSG00000089486	CDIP1	16.2035	9.81189	48.1076	24.7077		ENSG00000089876	DHX32	6.93695	132.46	54.4487	64.6153		ENSG00000125868	DSTN	24.8999	188.379	94.5373	102.605
	ENSG00000089127	OAS1	3.17853	7.41138	1.82119	4.13703		ENSG00000089597	GANAB	200.059	48.3835	142.238	130.227		ENSG00000089902	RCOR1	24.2146	1.40353	213.358	79.6587		ENSG00000214078	CPNE1	149.346	2.27949	155.979	102.535
	ENSG00000089154	GCN1	50.6972	51.6975	6.98824	36.461		ENSG00000089639	GMIP	18.121	120.568	1.55916	46.7495		ENSG00000089916	GPATCH2L	17.4392	61.0756	6.36555	28.2934		ENSG00000130304	SLC27A1	12.314	13.872	281.322	102.503
	ENSG00000089157	RPLP0	4424.26	238.979	51.7106	1571.65		ENSG00000089682	RBM41	9.45223	1.29101	61.2665	24.0032		ENSG00000090006	LTBP4	47.6124	3.19188	46.4372	32.4138		ENSG00000116478	HDAC1	162.943	9.20858	135.269	102.473
	ENSG00000089159	PXN	20.5836	16.8947	247.137	94.8718		ENSG00000089685	BIRC5	49.6832	63.2093	3.51431	38.8023		ENSG00000090013	BLVRB	214.065	9.21694	87.026	103.436		ENSG00000070081	NUCB2	302.655	1.86899	2.80585	102.443
	ENSG00000089163	SIRT4	1.0949	173.769	17.8499	64.2379		ENSG00000089693	MLF2	125.318	2.0789	8.47677	45.2911		ENSG00000090020	SLC9A1	12.2364	67.9225	35.0719	38.4102		ENSG00000168961	LGALS9	109.227	193.155	4.72782	102.37
	ENSG00000089177	KIF16B	6.72355	475.216	179.827	220.589		ENSG00000089723	OTUB2	1.3275	8.74831	63.555	24.5436		ENSG00000090054	SPTLC1	46.1153	7.66502	31.2371	28.3391		ENSG00000272068	BCAN-AS1	14.5167	288.65	3.69154	102.286
	ENSG00000089195	TRMT6	51.0857	131.129	496.178	226.131		ENSG00000089737	DDX24	63.1698	68.8927	7.12738	46.3966		ENSG00000090060	PAPOLA	91.8665	25.9577	53.3863	57.0701		ENSG00000067064	IDI1	74.6212	108.929	123.223	102.258
	ENSG00000089220	PEBP1	247.018	636.634	135.517	339.723		ENSG00000089775	ZBTB25	2.76627	6.30679	28.3606	12.4779		ENSG00000090061	CCNK	38.4288	14.1593	11.7546	21.4476		ENSG00000130332	LSM7	255.764	2.25943	48.7384	102.254
	ENSG00000089234	BRAP	16.8397	12.5493	644.752	224.714		ENSG00000089818	NECAP1	10.1478	26.3956	15.9167	17.4867		ENSG00000090097	PCBP4	44.9262	67.0776	87.1829	66.3956		ENSG00000075539	FRYL	16.4247	18.7782	271.285	102.163
	ENSG00000089248	ERP29	170.801	65.5557	11.5679	82.6415		ENSG00000089820	ARHGAP4	57.3919	17.2359	56.9012	43.843		ENSG00000090238	YPEL3	50.9944	232.959	122.505	135.486		ENSG00000105879	CBLL1	14.5344	8.96303	282.786	102.094
	ENSG00000089280	FUS	499.412	31.9891	66.5063	199.302		ENSG00000089876	DHX32	6.65362	51.6967	198.806	85.7189		ENSG00000090263	MRPS33	18.9736	7.72408	57.8971	28.1983		ENSG00000173207	CKS1B	297.829	1.88037	6.57237	102.094
	ENSG00000089289	IGBP1	113.743	195.255	31.7132	113.57		ENSG00000089902	RCOR1	27.0629	183.815	8.55771	73.1452		ENSG00000090266	NDUFB2	76.7421	42.531	78.1888	65.8207		ENSG00000169062	UPF3A	162.183	80.3466	63.5968	102.042
	ENSG00000089327	FXYD5	620.844	30.8629	275.448	309.052		ENSG00000089916	GPATCH2L	15.8601	8.0757	43.6109	22.5156		ENSG00000090273	NUDC	121.404	85.1081	90.3833	98.9653		ENSG00000156273	BACH1	16.2684	18.3282	271.417	102.005
	ENSG00000089335	ZNF302	12.0963	8.7452	35.706	18.8492		ENSG00000090006	LTBP4	54.3678	45.133	90.3645	63.2884		ENSG00000090316	MAEA	56.0318	32.8633	8.2325	32.3759		ENSG00000089597	GANAB	218.787	2.26161	84.7776	101.942
	ENSG00000089351	GRAMD1A	67.0128	56.1245	9.33798	44.1584		ENSG00000090013	BLVRB	205.394	87.3103	37.8014	110.169		ENSG00000090339	ICAM1	81.939	38.5243	159.236	93.233		ENSG00000168653	NDUFS5	299.503	4.62567	1.59701	101.909
	ENSG00000089486	CDIP1	11.5613	177.776	55.4266	81.588		ENSG00000090020	SLC9A1	8.09576	33.4304	36.8448	26.1237		ENSG00000090372	STRN4	78.2203	52.1133	23.3908	51.2415		ENSG00000008394	MGST1	141.941	146.497	17.2453	101.895
	ENSG00000089597	GANAB	257.84	3.75972	205.594	155.731		ENSG00000090054	SPTLC1	41.7556	28.4096	46.9472	39.0375		ENSG00000090376	IRAK3	10.0002	15.095	21.0798	15.3917		ENSG00000120688	WBP4	14.9409	171.529	119.209	101.893
	ENSG00000089639	GMIP	36.8677	69.1549	3.99762	36.6734		ENSG00000090060	PAPOLA	86.7226	46.9739	12.7509	48.8158		ENSG00000090382	LYZ	166.743	77.6494	44.9345	96.4422		ENSG00000242735	RPSAP26	7.85033	30.3624	267.047	101.753
	ENSG00000089682	RBM41	9.67429	4.60782	72.9676	29.0832		ENSG00000090061	CCNK	33.9943	16.8805	70.0458	40.3069		ENSG00000090432	MUL1	24.438	116.381	90.5138	77.1108		ENSG00000091640	SPAG7	56.8414	235.162	13.2532	101.752
	ENSG00000089685	BIRC5	57.3226	13.15	3.78169	24.7514		ENSG00000090097	PCBP4	38.5091	73.2911	113.957	75.2523		ENSG00000090447	TFAP4	30.6521	55.1812	66.8553	50.8962		ENSG00000165458	INPPL1	75.5071	188.695	41.0381	101.747
	ENSG00000089693	MLF2	194.464	104.364	13.2887	104.039		ENSG00000090238	YPEL3	51.6112	117.873	50.4599	73.3148		ENSG00000090470	PDCD7	48.2122	79.6689	7.28126	45.0541		ENSG00000115128	SF3B6	202.842	14.4844	87.8959	101.741
	ENSG00000089723	OTUB2	3.2753	10.1356	100.192	37.8675		ENSG00000090263	MRPS33	14.2562	52.1896	72.7297	46.3918		ENSG00000090487	SPG21	94.4708	108.32	14.263	72.3513		ENSG00000186073	CDIN1	5.38129	234.871	64.9295	101.727
	ENSG00000089737	DDX24	69.6664	36.5813	9.95645	38.7347		ENSG00000090266	NDUFB2	65.0708	76.2398	88.8585	76.7231		ENSG00000090520	DNAJB11	65.8288	9.22514	32.9619	36.0053		ENSG00000066926	FECH	11.2953	140.276	153.416	101.662
	ENSG00000089775	ZBTB25	4.54387	20.8205	36.0671	20.4772		ENSG00000090273	NUDC	115.339	89.0422	11.0975	71.8264		ENSG00000090554	FLT3LG	3.838	157.867	2.80633	54.8372		ENSG00000292345	ZBED1	9.45294	1.76204	293.678	101.631
	ENSG00000089818	NECAP1	15.3105	49.607	19.6868	28.2015		ENSG00000090316	MAEA	54.1856	11.5131	148.732	71.4769		ENSG00000090565	RAB11FIP3	14.0919	25.7167	30.3158	23.3748		ENSG00000129244	ATP1B2	1.93314	297.856	4.52995	101.44
	ENSG00000089820	ARHGAP4	117.932	281.747	51.0763	150.252		ENSG00000090339	ICAM1	74.4129	142.071	23.6692	80.0511		ENSG00000090581	GNPTG	27.4968	29.0106	184.546	80.351		ENSG00000143363	PRUNE1	18.1456	81.7562	204.253	101.385
	ENSG00000089876	DHX32	12.1218	12.2002	285.954	103.425		ENSG00000090372	STRN4	79.0446	25.5865	21.4254	42.0188		ENSG00000090612	ZNF268	1.77026	41.5397	11.3851	18.2317		ENSG00000106261	ZKSCAN1	43.2124	257.398	3.41181	101.341
	ENSG00000089902	RCOR1	35.6031	59.3057	11.7252	35.5447		ENSG00000090376	IRAK3	11.1794	20.5876	42.4995	24.7555		ENSG00000090615	GOLGA3	31.4745	109.916	16.862	52.751		ENSG00000147457	CHMP7	26.8293	261.359	15.6105	101.266
	ENSG00000089916	GPATCH2L	19.9707	115.557	62.414	65.9805		ENSG00000090382	LYZ	137.531	43.9234	96.9035	92.7858		ENSG00000090621	PABPC4	200.224	69.4542	54.9643	108.214		ENSG00000196369	SRGAP2B	14.8013	266.381	22.3986	101.194
	ENSG00000090006	LTBP4	56.0992	49.1697	113.809	73.026		ENSG00000090432	MUL1	24.1591	94.7656	66.1724	61.6991		ENSG00000090661	CERS4	8.02743	6.66492	3.353	6.01511		ENSG00000184584	STING1	105.334	72.0438	125.889	101.089
	ENSG00000090013	BLVRB	296.087	42.6909	48.566	129.115		ENSG00000090447	TFAP4	24.1366	42.5023	9.61958	25.4195		ENSG00000090674	MCOLN1	16.9891	14.3601	15.7572	15.7021		ENSG00000105290	APLP1	7.09762	187.309	108.745	101.051
	ENSG00000090020	SLC9A1	12.3283	26.997	41.1354	26.8202		ENSG00000090470	PDCD7	42.8667	9.41672	13.7298	22.0044		ENSG00000090686	USP48	54.6557	29.8591	158.653	81.056		ENSG00000100330	MTMR3	13.5853	5.65353	283.713	100.984
	ENSG00000090054	SPTLC1	59.0957	20.5124	25.4948	35.0343		ENSG00000090487	SPG21	101.325	13.9731	25.1963	46.8313		ENSG00000090776	EFNB1	4.52141	1.93171	36.583	14.3454		ENSG00000077585	GPR137B	4.6483	125.987	172.307	100.981
	ENSG00000090060	PAPOLA	109.489	91.2947	21.6035	74.129		ENSG00000090520	DNAJB11	68.9393	26.5938	1.15482	32.2293		ENSG00000090857	PDPR	16.0368	28.5176	59.5231	34.6925		ENSG00000134882	UBAC2	189.086	31.2035	82.142	100.811
	ENSG00000090061	CCNK	48.3715	159.767	93.5584	100.566		ENSG00000090554	FLT3LG	8.3762	2.14089	27.8134	12.7768		ENSG00000090861	AARS1	168.709	182.665	28.5486	126.641		ENSG00000197062	ZSCAN26	3.66165	16.783	281.853	100.766
	ENSG00000090097	PCBP4	46.2852	69.8919	158.248	91.475		ENSG00000090565	RAB11FIP3	15.3717	27.3603	193.899	78.8769		ENSG00000090863	GLG1	39.5996	12.3992	6.61684	19.5386		ENSG00000137193	PIM1	81.3179	175.174	45.801	100.764
	ENSG00000090238	YPEL3	32.5509	81.8047	72.167	62.1742		ENSG00000090581	GNPTG	25.7213	190.458	10.1428	75.4408		ENSG00000090889	KIF4A	57.2061	20.4545	1.58588	26.4155		ENSG00000101407	TTI1	7.67382	201.423	93.116	100.738
	ENSG00000090263	MRPS33	22.648	133.199	78.6117	78.1529		ENSG00000090612	ZNF268	2.37972	8.81229	16.2815	9.15784		ENSG00000090905	TNRC6A	28.8814	55.5976	3.20332	29.2274		ENSG00000075785	RAB7A	294.076	4.36944	3.59486	100.68
	ENSG00000090266	NDUFB2	93.4627	11.7579	118.466	74.5623		ENSG00000090615	GOLGA3	28.767	14.58	64.1967	35.8479		ENSG00000090924	PLEKHG2	8.81424	3.96173	3.84478	5.54025		ENSG00000106263	EIF3B	133.661	24.6865	143.668	100.672
	ENSG00000090273	NUDC	160.448	166.218	11.2505	112.639		ENSG00000090621	PABPC4	188.03	57.4786	3.44005	82.9829		ENSG00000090932	DLL3	1.17914	19.2182	20.1241	13.5072		ENSG00000104695	PPP2CB	30.7857	24.9387	246.134	100.619
	ENSG00000090316	MAEA	75.6232	31.5402	166.858	91.3405		ENSG00000090661	CERS4	11.2041	2.79694	17.1705	10.3905		ENSG00000090971	NAT14	3.12547	151.803	18.8959	57.9415		ENSG00000023287	RB1CC1	28.4796	243.698	29.5574	100.578
	ENSG00000090339	ICAM1	78.9595	33.6893	30.3297	47.6595		ENSG00000090674	MCOLN1	14.539	16.7578	133.44	54.9123		ENSG00000090975	PITPNM2	3.60856	38.4373	34.8148	25.6202		ENSG00000112695	COX7A2	263.075	21.225	17.365	100.555
	ENSG00000090372	STRN4	132.264	51.6385	35.6261	73.1763		ENSG00000090686	USP48	59.2933	122.751	37.2046	73.0829		ENSG00000090989	EXOC1	18.1225	52.9856	24.607	31.905		ENSG00000133056	PIK3C2B	5.5698	235.952	59.9036	100.475
	ENSG00000090376	IRAK3	12.0943	108.067	50.313	56.8247		ENSG00000090776	EFNB1	3.49252	31.3668	57.179	30.6794		ENSG00000091009	RBM27	17.3288	31.4174	1.96463	16.9036		ENSG00000159140	SON	74.0737	148.411	78.9207	100.469
	ENSG00000090382	LYZ	165.865	98.8036	105.299	123.323		ENSG00000090857	PDPR	17.148	59.2248	25.4942	33.9557		ENSG00000091039	OSBPL8	32.7339	5.72255	8.02683	15.4944		ENSG00000113048	MRPS27	38.2819	192.29	70.7826	100.452
	ENSG00000090432	MUL1	31.2396	9.03225	74.4731	38.2483		ENSG00000090861	AARS1	131.981	29.5688	6.39164	55.9806		ENSG00000091073	DTX2	25.1108	1.30254	29.6214	18.6782		ENSG00000164576	SAP30L	9.88537	286.048	5.36081	100.431
	ENSG00000090447	TFAP4	36.9619	17.8406	10.4673	21.7566		ENSG00000090863	GLG1	36.5003	7.371	1.4565	15.1093		ENSG00000091106	NLRC4	3.26219	1.9226	5.73323	3.63934		ENSG00000106236	NPTX2	1.71214	8.77158	290.615	100.366
	ENSG00000090470	PDCD7	53.0992	26.5192	18.6793	32.7659		ENSG00000090889	KIF4A	58.6692	2.41652	2.0837	21.0565		ENSG00000091127	PUS7	6.58325	4.09841	18.9283	9.86999		ENSG00000148985	PGAP2	13.2874	43.6056	244.061	100.318
	ENSG00000090487	SPG21	107.006	4.20345	22.4471	44.5521		ENSG00000090905	TNRC6A	29.3429	3.97478	4.126	12.4812		ENSG00000091140	DLD	29.0338	17.6086	56.8006	34.481		ENSG00000122218	COPA	114.21	182.878	3.86228	100.317
	ENSG00000090520	DNAJB11	97.3553	43.7522	4.33628	48.4813		ENSG00000090924	PLEKHG2	4.70088	19.3985	19.5276	14.5423		ENSG00000091157	WDR7	9.266	17.4815	39.5991	22.1155		ENSG00000163815	CLEC3B	1.82991	13.5562	285.331	100.239
	ENSG00000090554	FLT3LG	9.42199	208.155	42.9549	86.8439		ENSG00000090932	DLL3	1.11083	19.9806	19.1396	13.4103		ENSG00000091164	TXNL1	23.2963	34.6393	8.37798	22.1045		ENSG00000133704	IPO8	25.751	58.9133	215.758	100.141
	ENSG00000090565	RAB11FIP3	19.5083	13.4368	207.789	80.2446		ENSG00000090971	NAT14	2.75803	35.7717	34.2922	24.274		ENSG00000091317	CMTM6	54.4378	25.0676	40.26	39.9218		ENSG00000173137	ADCK5	7.54364	9.57203	283.204	100.106
	ENSG00000090581	GNPTG	26.1711	16.9573	11.1343	18.0876		ENSG00000090975	PITPNM2	4.26295	28.0158	26.5515	19.6101		ENSG00000091409	ITGA6	36.7849	1.95459	19.6132	19.4509		ENSG00000227598	-	4.93389	2.12965	293.201	100.088
	ENSG00000090612	ZNF268	4.16309	84.396	15.3712	34.6434		ENSG00000090989	EXOC1	17.7447	1.92308	2.43396	7.36726		ENSG00000091428	RAPGEF4	1.65266	5.17316	112.947	39.9242		ENSG00000159461	AMFR	45.5819	188.87	65.7769	100.076
	ENSG00000090615	GOLGA3	42.9976	6.64642	71.2555	40.2998		ENSG00000091009	RBM27	19.5207	5.93783	6.80157	10.7534		ENSG00000091436	MAP3K20	9.38599	32.181	72.557	38.0413		ENSG00000254999	BRK1	294.07	3.12569	2.55714	99.9175
	ENSG00000090621	PABPC4	206.163	17.9527	7.41279	77.1763		ENSG00000091039	OSBPL8	35.9001	31.5594	31.991	33.1502		ENSG00000091483	FH	42.4521	9.47657	4.82516	18.9179		ENSG00000170275	CRTAP	221.331	70.4278	7.99302	99.9172
	ENSG00000090661	CERS4	14.0965	279.18	18.7685	104.015		ENSG00000091073	DTX2	26.7156	8.71919	8.54223	14.659		ENSG00000091490	SEL1L3	23.1156	28.0888	56.7068	35.9704		ENSG00000138166	DUSP5	18.5485	258.795	22.2456	99.8631
	ENSG00000090674	MCOLN1	16.9234	43.0797	288.885	116.296		ENSG00000091106	NLRC4	2.19067	19.9433	19.5729	13.9023		ENSG00000091513	TF	2.00336	54.5341	48.2561	34.9312		ENSG00000112992	NNT	69.2149	25.8435	204.387	99.8153
	ENSG00000090686	USP48	70.1254	77.7155	39.1199	62.3203		ENSG00000091127	PUS7	6.84051	55.1954	54.7873	38.9411		ENSG00000091527	CDV3	115.092	35.167	17.5139	55.9243		ENSG00000107874	CUEDC2	177.962	102.082	19.3443	99.7958
	ENSG00000090776	EFNB1	7.60084	35.4947	73.0797	38.7251		ENSG00000091140	DLD	33.5783	37.0527	35.1251	35.252		ENSG00000091542	ALKBH5	72.9245	8.46309	28.6026	36.6634		ENSG00000115137	DNAJC27	1.97618	200.436	96.8861	99.7662
	ENSG00000090857	PDPR	17.3412	9.2032	32.8719	19.8055		ENSG00000091157	WDR7	8.12839	9.7843	8.81609	8.90959		ENSG00000091592	NLRP1	5.33348	42.2229	194.995	80.8503		ENSG00000106443	PHF14	132.085	75.6434	90.967	99.5652
	ENSG00000090861	AARS1	294.727	1.78334	8.71254	101.741		ENSG00000091164	TXNL1	28.1165	49.3604	49.3777	42.2849		ENSG00000091622	PITPNM3	2.4957	22.0542	30.4393	18.3298		ENSG00000064666	CNN2	110.328	78.2512	110.042	99.5406
	ENSG00000090863	GLG1	41.2522	2.29691	2.32745	15.2922		ENSG00000091317	CMTM6	52.5453	23.9231	21.0824	32.5169		ENSG00000091640	SPAG7	53.2603	1.35717	133.087	62.5682		ENSG00000233276	GPX1	292.869	1.70388	3.981	99.518
	ENSG00000090889	KIF4A	75.7062	5.35622	2.13591	27.7328		ENSG00000091409	ITGA6	34.9491	1.3485	1.32805	12.5419		ENSG00000091651	ORC6	50.8528	106.659	33.8248	63.7788		ENSG00000214535	RPS15AP1	8.92617	65.8415	223.767	99.5114
	ENSG00000090905	TNRC6A	34.6978	26.3447	5.9058	22.3161		ENSG00000091436	MAP3K20	8.87641	114.233	105.827	76.312		ENSG00000091732	ZC3HC1	15.3258	77.5023	3.15268	31.9936		ENSG00000132334	PTPRE	32.0757	100.653	165.714	99.481
	ENSG00000090924	PLEKHG2	10.0008	26.7221	27.2441	21.3223		ENSG00000091483	FH	40.7184	63.5798	63.7431	56.0138		ENSG00000091947	TMEM101	26.6631	8.05727	30.5305	21.7503		ENSG00000115339	GALNT3	8.54698	270.221	19.0204	99.2629
	ENSG00000090932	DLL3	2.58407	57.0082	25.7435	28.4453		ENSG00000091490	SEL1L3	21.5791	3.98978	5.00912	10.1926		ENSG00000092010	PSME1	206.01	2.02375	16.4778	74.8371		ENSG00000105698	USF2	257.656	14.0124	26.0372	99.2352
	ENSG00000090971	NAT14	2.88725	27.5019	57.1722	29.1871		ENSG00000091513	TF	1.49068	1.49021	1.71227	1.56439		ENSG00000092020	PPP2R3C	32.8899	53.5201	22.0461	36.152		ENSG00000140939	NOL3	2.94366	91.2367	203.103	99.0944
	ENSG00000090975	PITPNM2	6.16979	3.82695	24.5484	11.5151		ENSG00000091527	CDV3	107.076	42.3879	41.5662	63.6766		ENSG00000092036	HAUS4	117.597	52.6957	11.3198	60.5375		ENSG00000136158	SPRY2	42.3318	132.174	122.666	99.0572
	ENSG00000090989	EXOC1	26.2675	14.062	4.51612	14.9485		ENSG00000091542	ALKBH5	65.5792	49.3133	53.196	56.0295		ENSG00000092067	CEBPE	30.9289	18.7814	27.7636	25.8246		ENSG00000283498	MIR1244-2	288.561	5.13359	3.26062	98.985
	ENSG00000091009	RBM27	25.5971	57.4807	15.2295	32.7691		ENSG00000091592	NLRP1	3.99346	15.7072	18.4576	12.7194		ENSG00000092068	SLC7A8	4.08782	20.3171	403.167	142.524		ENSG00000120159	CAAP1	13.4938	269.09	14.2171	98.9337
	ENSG00000091039	OSBPL8	58.2622	13.1822	57.5869	43.0104		ENSG00000091640	SPAG7	41.2874	19.7064	17.1364	26.0434		ENSG00000092094	OSGEP	35.9091	215.555	82.1595	111.208		ENSG00000103035	PSMD7	103.318	16.6757	176.798	98.9308
	ENSG00000091073	DTX2	26.3534	27.797	12.1315	22.094		ENSG00000091651	ORC6	49.3626	210.661	202.14	154.055		ENSG00000092098	RNF31	16.9745	31.8915	23.8736	24.2465		ENSG00000139618	BRCA2	5.41721	30.7921	260.393	98.8674
	ENSG00000091106	NLRC4	4.5713	72.1732	29.4002	35.3816		ENSG00000091732	ZC3HC1	14.5399	30.9636	34.1944	26.566		ENSG00000092108	SCFD1	20.938	121.728	16.3336	53		ENSG00000144659	SLC25A38	61.1764	114.396	120.915	98.8289
	ENSG00000091127	PUS7	13.8637	52.5436	71.6172	46.0082		ENSG00000091947	TMEM101	19.9578	127.243	125.331	90.844		ENSG00000092140	G2E3	11.6759	31.4094	2.02539	15.0369		ENSG00000173145	NOC3L	10.3426	281.079	4.81683	98.7461
	ENSG00000091140	DLD	55.7956	1.13581	49.5391	35.4902		ENSG00000092010	PSME1	213.852	28.9291	28.3945	90.3918		ENSG00000092148	HECTD1	30.2588	3.11337	14.2794	15.8839		ENSG00000284135	MIR3654	262.765	6.21784	27.1578	98.7137
	ENSG00000091157	WDR7	11.1257	13.388	13.6999	12.7379		ENSG00000092020	PPP2R3C	26.7731	3.76157	3.26267	11.2658		ENSG00000092199	HNRNPC	418.566	32.5408	26.442	159.183		ENSG00000205220	PSMB10	37.7168	4.26205	253.724	98.5677
	ENSG00000091164	TXNL1	29.8509	62.9473	72.2493	55.0158		ENSG00000092036	HAUS4	131.156	33.0646	35.8543	66.6917		ENSG00000092201	SUPT16H	90.3545	15.7649	12.2923	39.4706		ENSG00000169752	NRG4	3.44668	82.1904	209.908	98.5151
	ENSG00000091317	CMTM6	71.4207	35.8872	32.0529	46.4536		ENSG00000092067	CEBPE	29.1704	13.7095	16.4947	19.7915		ENSG00000092203	TOX4	24.7354	23.5908	14.8357	21.054		ENSG00000264204	AGAP7P	2.03873	9.77216	283.633	98.4814
	ENSG00000091409	ITGA6	47.9531	1.16057	167.525	72.2129		ENSG00000092068	SLC7A8	4.09457	20.3474	19.1824	14.5415		ENSG00000092208	GEMIN2	14.5901	11.4443	3.52182	9.85208		ENSG00000065534	MYLK	1.56707	268.468	25.333	98.4562
	ENSG00000091436	MAP3K20	13.161	164.76	65.0176	80.9795		ENSG00000092094	OSGEP	34.2463	11.2292	12.0913	19.1889		ENSG00000092295	TGM1	1.64499	30.0273	57.1069	29.5931		ENSG00000104915	STX10	129.732	120.992	44.4477	98.3903
	ENSG00000091483	FH	63.478	64.1655	4.51826	44.0539		ENSG00000092098	RNF31	16.1554	33.3791	30.9775	26.8373		ENSG00000092330	TINF2	7.47003	328.628	253.85	196.649		ENSG00000138363	ATIC	74.7135	68.8613	151.51	98.3616
	ENSG00000091490	SEL1L3	32.9763	4.1202	1.98813	13.0282		ENSG00000092108	SCFD1	19.5469	479.88	448.686	316.038		ENSG00000092439	TRPM7	22.5329	82.3923	16.1262	40.3505		ENSG00000134744	TUT4	46.678	106.702	141.505	98.2951
	ENSG00000091527	CDV3	173.336	1.25682	61.9061	78.8331		ENSG00000092140	G2E3	11.3884	60.6847	83.9894	52.0208		ENSG00000092445	TYRO3	13.3874	22.6202	82.7692	39.5923		ENSG00000106399	RPA3	30.8629	186.291	77.6214	98.2585
	ENSG00000091542	ALKBH5	68.1594	62.8959	75.6248	68.8934		ENSG00000092148	HECTD1	31.6274	19.6681	19.3651	23.5535		ENSG00000092470	WDR76	17.715	17.7119	333.579	123.002		ENSG00000119048	UBE2B	22.5628	258.823	13.355	98.2468
	ENSG00000091592	NLRP1	4.11078	73.9216	23.126	33.7195		ENSG00000092199	HNRNPC	394.582	17.417	16.3113	142.77		ENSG00000092529	CAPN3	2.83583	2.68641	4.24065	3.2543		ENSG00000136930	PSMB7	198.91	89.4445	6.32412	98.2261
	ENSG00000091622	PITPNM3	1.47601	24.3979	29.6957	18.5232		ENSG00000092201	SUPT16H	84.3484	1.80885	2.78292	29.6467		ENSG00000092531	SNAP23	49.9542	6.64425	15.1693	23.9226		ENSG00000127334	DYRK2	9.7596	213.239	71.5193	98.1726
	ENSG00000091640	SPAG7	60.4643	28.3859	244.521	111.124		ENSG00000092203	TOX4	20.527	5.76175	9.09236	11.7937		ENSG00000092621	PHGDH	256.712	26.6151	12.534	98.6203		ENSG00000159199	ATP5MC1	54.9564	23.5557	215.89	98.1342
	ENSG00000091651	ORC6	73.6208	243.276	53.1853	123.361		ENSG00000092208	GEMIN2	17.623	29.2732	27.8886	24.9283		ENSG00000092758	COL9A3	14.0583	15.2868	35.2234	21.5228		ENSG00000167196	FBXO22	5.58483	226.215	62.5864	98.1288
	ENSG00000091732	ZC3HC1	22.1675	52.2455	93.718	56.0436		ENSG00000092295	TGM1	2.16625	12.3195	12.6987	9.06149		ENSG00000092820	EZR	87.9975	20.3861	8.95081	39.1115		ENSG00000265165	MIR4307	3.59058	287.978	2.21364	97.9272
	ENSG00000091947	TMEM101	27.9585	88.1378	49.5566	55.2176		ENSG00000092330	TINF2	8.30973	18.2762	18.1269	14.9043		ENSG00000092841	MYL6	555.229	3.03369	39.1882	199.15		ENSG00000182973	CNOT10	37.9306	227.673	28.0932	97.8991
	ENSG00000092010	PSME1	233.91	45.7703	4.15379	94.6115		ENSG00000092439	TRPM7	26.8791	4.2462	2.63347	11.2529		ENSG00000092847	AGO1	4.90696	50.0476	6.28039	20.4117		ENSG00000160948	VPS28	67.4516	10.8809	215.339	97.8906
	ENSG00000092020	PPP2R3C	51.0478	4.29139	50.532	35.2904		ENSG00000092445	TYRO3	13.6377	56.2002	58.516	42.7847		ENSG00000092853	CLSPN	11.4486	263.159	28.6168	101.075		ENSG00000159403	C1R	8.35761	186.64	97.9868	97.6616
	ENSG00000092036	HAUS4	99.2102	49.4557	13.9085	54.1915		ENSG00000092470	WDR76	17.6166	207.88	202.173	142.557		ENSG00000092871	RFFL	13.1811	17.22	18.1059	16.169		ENSG00000057757	PITHD1	51.3468	216.874	24.7195	97.6468
	ENSG00000092067	CEBPE	46.6208	22.2898	33.2867	34.0658		ENSG00000092529	CAPN3	4.31895	11.0228	11.3005	8.88075		ENSG00000092929	UNC13D	38.5479	78.1389	91.0432	69.2433		ENSG00000213024	NUP62	99.1448	11.7434	181.769	97.5524
	ENSG00000092068	SLC7A8	4.93642	35.0919	18.9133	19.6472		ENSG00000092531	SNAP23	54.3385	58.1535	83.0103	65.1674		ENSG00000092931	MFSD11	11.7151	552.209	67.9857	210.636		ENSG00000100813	ACIN1	179.983	41.7388	70.7193	97.4803
	ENSG00000092094	OSGEP	48.8833	18.2878	39.4215	35.5309		ENSG00000092621	PHGDH	212.117	529.347	517.625	419.697		ENSG00000092964	DPYSL2	43.3388	3.70424	2.52964	16.5242		ENSG00000171314	PGAM1	269.38	3.28873	19.5751	97.4145
	ENSG00000092098	RNF31	13.4865	41.2381	545.453	200.059		ENSG00000092758	COL9A3	13.5972	4.38499	4.42461	7.46893		ENSG00000092978	GPATCH2	4.57727	12.778	53.2006	23.5186		ENSG00000139644	TMBIM6	275.338	2.10349	14.1054	97.1822
	ENSG00000092108	SCFD1	33.1748	614.887	128.135	258.732		ENSG00000092820	EZR	83.3191	11.7156	10.5648	35.1998		ENSG00000093000	NUP50	21.694	11.1662	42.223	25.0278		ENSG00000142178	SIK1	1.9519	11.2044	278.278	97.1449
	ENSG00000092140	G2E3	17.6957	135.658	27.8466	60.4001		ENSG00000092841	MYL6	288.378	13.6646	12.5028	104.848		ENSG00000093009	CDC45	15.458	33.2172	41.4422	30.0392		ENSG00000167772	ANGPTL4	6.20796	245.855	39.2105	97.0912
	ENSG00000092148	HECTD1	39.7381	30.2619	26.5719	32.1906		ENSG00000092847	AGO1	4.71974	32.0849	30.3604	22.3884		ENSG00000093010	COMT	74.7592	10.8343	3.9412	29.8449		ENSG00000149930	TAOK2	49.3023	138.696	103.258	97.0854
	ENSG00000092199	HNRNPC	583.727	28.704	1.80853	204.747		ENSG00000092853	CLSPN	12.0802	11.4364	12.5222	12.0129		ENSG00000093072	ADA2	78.0167	36.7535	32.3024	49.0242		ENSG00000105287	PRKD2	27.5061	4.33918	259.023	96.956
	ENSG00000092201	SUPT16H	125.32	1.9709	17.6263	48.3058		ENSG00000092871	RFFL	11.9982	38.6531	40.1562	30.2692		ENSG00000093100	-	4.28586	7.91319	8.08748	6.76218		ENSG00000109861	CTSC	129.023	124.323	37.5174	96.9546
	ENSG00000092203	TOX4	28.5214	19.6212	43.1876	30.4434		ENSG00000092929	UNC13D	31.5817	5.56724	5.87368	14.3409		ENSG00000093144	ECHDC1	52.033	23.3958	18.9758	31.4682		ENSG00000168214	RBPJ	52.774	124.192	113.882	96.9494
	ENSG00000092208	GEMIN2	22.543	1.13026	23.6494	15.7742		ENSG00000092931	MFSD11	12.833	24.1172	21.7871	19.5791		ENSG00000093167	LRRFIP2	44.6034	22.462	23.4563	30.1739		ENSG00000169131	ZNF354A	6.11767	153.855	130.638	96.8701
	ENSG00000092295	TGM1	1.28394	45.0718	31.2923	25.8827		ENSG00000092964	DPYSL2	37.9247	13.0883	12.8357	21.2829		ENSG00000093183	SEC22C	43.1968	87.0583	25.5312	51.9288		ENSG00000105379	ETFB	203.537	64.0982	22.8591	96.8315
	ENSG00000092330	TINF2	12.6035	24.1304	1.03492	12.5896		ENSG00000092978	GPATCH2	5.55509	60.8308	51.6009	39.3289		ENSG00000093217	XYLB	4.84633	68.4588	32.8084	35.3712		ENSG00000110321	EIF4G2	229.5	20.6774	40.2317	96.803
	ENSG00000092439	TRPM7	41.2886	32.5514	67.5795	47.1398		ENSG00000093000	NUP50	24.3017	55.2559	57.1963	45.5846		ENSG00000094631	HDAC6	34.7396	47.1354	11.6034	31.1595		ENSG00000143319	ISG20L2	32.384	172.302	85.5525	96.7462
	ENSG00000092445	TYRO3	24.4865	1.64321	460.639	162.256		ENSG00000093009	CDC45	12.9614	2.68875	2.30153	5.9839		ENSG00000094804	CDC6	8.71363	43.4696	38.9852	30.3895		ENSG00000198727	MT-CYB	222.83	45.9145	21.1528	96.6326
	ENSG00000092470	WDR76	30.0593	68.755	8.89828	35.9042		ENSG00000093010	COMT	50.7085	48.864	50.8951	50.1558		ENSG00000094841	UPRT	18.8911	36.1531	8.96602	21.3367		ENSG00000136146	MED4	58.364	105.456	125.871	96.5637
	ENSG00000092529	CAPN3	1.53631	455.637	102.318	186.497		ENSG00000093072	ADA2	67.8207	45.8256	42.7561	52.1341		ENSG00000094880	CDC23	18.7155	4.4548	119.762	47.6442		ENSG00000008735	MAPK8IP2	3.9644	4.61663	280.986	96.5222
	ENSG00000092531	SNAP23	64.97	8.40798	725.488	266.289		ENSG00000093100	-	2.49802	38.3454	36.261	25.7015		ENSG00000094914	AAAS	26.1319	32.5925	28.1985	28.9743		ENSG00000205581	HMGN1	251.084	1.91041	36.4911	96.4952
	ENSG00000092621	PHGDH	467.831	145.309	7.83177	206.991		ENSG00000093144	ECHDC1	45.9383	3.73993	3.98587	17.888		ENSG00000094916	CBX5	38.087	10.2624	69.5553	39.3016		ENSG00000115866	DARS1	125.482	53.91	109.942	96.4448
	ENSG00000092758	COL9A3	10.0304	712.034	20.2929	247.453		ENSG00000093167	LRRFIP2	46.1899	32.1475	31.3207	36.5527		ENSG00000094975	SUCO	10.7985	23.2646	32.749	22.2707		ENSG00000141428	C18orf21	16.7294	67.2925	204.993	96.3384
	ENSG00000092820	EZR	140.604	8.08063	15.797	54.8273		ENSG00000093183	SEC22C	37.2357	8.78884	9.30517	18.4432		ENSG00000095002	MSH2	35.8039	24.0658	20.0602	26.6433		ENSG00000255233	-	2.31769	284.527	2.16133	96.3353
	ENSG00000092841	MYL6	726.208	19.7871	58.3824	268.126		ENSG00000093217	XYLB	5.31908	18.7343	18.549	14.2008		ENSG00000095015	MAP3K1	9.87662	30.2524	61.2229	33.784		ENSG00000177156	TALDO1	246.233	35.967	6.73475	96.3116
	ENSG00000092847	AGO1	8.01318	13.473	13.8735	11.7865		ENSG00000094631	HDAC6	32.1913	24.5887	25.8588	27.5463		ENSG00000095059	DHPS	109.864	34.5423	29.2628	57.8899		ENSG00000129351	ILF3	249.805	34.3074	4.16999	96.0942
	ENSG00000092853	CLSPN	19.2233	58.55	40.322	39.3651		ENSG00000094804	CDC6	8.26084	23.0136	24.934	18.7361		ENSG00000095066	HOOK2	27.2176	10.3204	13.9228	17.1536		ENSG00000099783	HNRNPM	219.452	21.0937	47.4348	95.9935
	ENSG00000092871	RFFL	14.9396	14.2894	12.1213	13.7835		ENSG00000094841	UPRT	16.829	34.7066	34.375	28.6369		ENSG00000095139	ARCN1	75.932	35.4755	17.1833	42.8636		ENSG00000140105	WARS1	155.3	83.9827	48.6298	95.9709
	ENSG00000092929	UNC13D	56.6675	40.7768	37.0071	44.8171		ENSG00000094880	CDC23	24.597	9.33193	10.5269	14.8186		ENSG00000095209	TMEM38B	36.3028	8.88073	66.8525	37.3453		ENSG00000171490	RSL1D1	152.205	37.8964	97.5061	95.8692
	ENSG00000092931	MFSD11	15.3353	10.8167	38.6139	21.5886		ENSG00000094914	AAAS	23.4293	39.203	35.245	32.6258		ENSG00000095261	PSMD5	20.9184	126.106	7.60284	51.5423		ENSG00000099622	CIRBP	181.118	15.3922	90.8841	95.7981
	ENSG00000092964	DPYSL2	40.6372	37.4611	81.8233	53.3072		ENSG00000094916	CBX5	34.0191	9.48816	9.09647	17.5346		ENSG00000095303	PTGS1	68.8838	35.5898	26.9047	43.7928		ENSG00000198856	OSTC	101.862	85.1028	100.004	95.6561
	ENSG00000092978	GPATCH2	11.2221	40.348	50.6495	34.0732		ENSG00000094975	SUCO	10.3027	103.66	93.3428	69.102		ENSG00000095319	NUP188	34.3064	71.7076	11.9528	39.3223		ENSG00000101294	HM13	260.011	14.9582	11.9162	95.6284
	ENSG00000093000	NUP50	38.6694	97.6878	4.04785	46.8017		ENSG00000095002	MSH2	38.3265	25.9941	24.7054	29.6753		ENSG00000095321	CRAT	16.8746	33.9874	11.8911	20.9177		ENSG00000132646	PCNA	210.407	56.1203	20.3239	95.617
	ENSG00000093009	CDC45	36.4046	46.2232	58.6033	47.077		ENSG00000095015	MAP3K1	9.2134	71.6292	73.401	51.4145		ENSG00000095370	SH2D3C	18.1259	20.5496	1.19674	13.2908		ENSG00000132153	DHX30	68.3977	181.232	37.1734	95.6011
	ENSG00000093010	COMT	88.5825	5.62565	55.1681	49.7921		ENSG00000095059	DHPS	94.1094	37.6038	33.6346	55.1159		ENSG00000095380	NANS	63.7363	66.7003	10.9254	47.1207		ENSG00000160404	TOR2A	9.50829	140.134	136.768	95.4701
	ENSG00000093072	ADA2	44.0203	71.3155	50.475	55.2703		ENSG00000095066	HOOK2	27.2781	21.2818	19.7994	22.7864		ENSG00000095383	TBC1D2	7.76118	27.9846	1.61341	12.4531		ENSG00000087266	SH3BP2	52.4808	7.14247	226.762	95.4618
	ENSG00000093100	-	3.98032	51.8181	12.5756	22.7913		ENSG00000095139	ARCN1	70.8361	65.4692	64.9632	67.0895		ENSG00000095485	CWF19L1	26.1033	12.3807	86.0877	41.5239		ENSG00000073331	ALPK1	5.98221	138.487	141.868	95.4455
	ENSG00000093144	ECHDC1	68.2578	50.6005	39.335	52.7311		ENSG00000095209	TMEM38B	34.0516	28.6277	30.376	31.0184		ENSG00000095564	BTAF1	12.2901	15.7549	9.68249	12.5758		ENSG00000182831	HAPSTR1	16.0331	28.6253	241.613	95.4238
	ENSG00000093167	LRRFIP2	54.3777	11.5177	20.4791	28.7915		ENSG00000095261	PSMD5	21.2927	12.2689	13.6636	15.7417		ENSG00000095574	IKZF5	9.35723	71.7761	52.2341	44.4558		ENSG00000078140	UBE2K	43.9943	51.1178	191.135	95.4157
	ENSG00000093183	SEC22C	49.571	37.2748	27.1773	38.0077		ENSG00000095303	PTGS1	62.2421	16.8366	15.6968	31.5918		ENSG00000095739	BAMBI	13.4879	7.57349	1.32787	7.46308		ENSG00000115649	CNPPD1	27.9874	110.001	148.208	95.3985
	ENSG00000093217	XYLB	11.1632	19.2071	40.853	23.7411		ENSG00000095319	NUP188	29.3782	65.1131	61.8809	52.1241		ENSG00000095787	WAC	83.0216	26.2827	1.95718	37.0872		ENSG00000125730	C3	32.4331	21.4489	232.273	95.385
	ENSG00000094631	HDAC6	38.8081	29.3323	36.0646	34.735		ENSG00000095321	CRAT	13.2252	6.26243	6.51559	8.66774		ENSG00000095794	CREM	5.97422	12.8357	15.7846	11.5315		ENSG00000207389	RNU1-4	3.76157	71.1262	211.223	95.3702
	ENSG00000094804	CDC6	18.1543	41.2007	57.7298	39.0283		ENSG00000095370	SH2D3C	17.7612	24.7113	25.7646	22.7457		ENSG00000095906	NUBP2	52.8083	9.45542	44.513	35.5922		ENSG00000078618	NRDC	104.853	2.28129	178.971	95.3684
	ENSG00000094841	UPRT	28.9813	38.3055	15.9987	27.7618		ENSG00000095380	NANS	61.53	14.0411	12.9648	29.512		ENSG00000095917	TPSD1	1.36303	12.196	16.758	10.1057		ENSG00000243696	-	2.82692	281.404	1.86244	95.3643
	ENSG00000094880	CDC23	38.9684	58.8753	66.0501	54.6313		ENSG00000095383	TBC1D2	6.44374	9.8688	10.4372	8.91657		ENSG00000095932	SMIM24	1.76208	92.5267	36.5378	43.6089		ENSG00000072042	RDH11	71.94	163.469	50.5403	95.3164
	ENSG00000094914	AAAS	37.545	14.0001	10.8838	20.8096		ENSG00000095485	CWF19L1	23.8428	12.1534	1.18031	12.3922		ENSG00000095951	HIVEP1	2.39898	8.0416	22.8761	11.1056		ENSG00000076685	NT5C2	115.352	52.9378	117.572	95.2871
	ENSG00000094916	CBX5	55.935	64.8755	150.06	90.2902		ENSG00000095564	BTAF1	12.8567	1.23223	11.86	8.64963		ENSG00000096060	FKBP5	35.7972	57.0021	4.76699	32.5221		ENSG00000104957	YJU2B	40.9045	26.8524	217.996	95.2511
	ENSG00000094975	SUCO	15.0401	10.5334	28.5232	18.0322		ENSG00000095574	IKZF5	9.84349	87.0617	1.24206	32.7157		ENSG00000096063	SRPK1	39.6527	1.55879	1125.67	388.96		ENSG00000168405	CMAHP	8.20324	255.712	21.5023	95.1392
	ENSG00000095002	MSH2	63.7257	160.448	117.013	113.729		ENSG00000095739	BAMBI	13.026	7.54748	82.6869	34.4201		ENSG00000096070	BRPF3	21.4912	2.18842	31.4728	18.3842		ENSG00000135624	CCT7	253.999	4.19058	27.1091	95.0996
	ENSG00000095015	MAP3K1	10.112	30.1105	48.9023	29.7083		ENSG00000095752	IL11	1.58604	49.4176	11.2483	20.7506		ENSG00000096080	MRPS18A	34.9941	32.9727	11.7577	26.5748		ENSG00000156467	UQCRB	246.39	28.5037	10.2609	95.0514
	ENSG00000095059	DHPS	109.827	119.109	28.0062	85.6472		ENSG00000095787	WAC	85.9518	1.74942	46.5888	44.7633		ENSG00000096092	TMEM14A	19.408	38.5202	4.62303	20.8504		ENSG00000143033	MTF2	20.0738	230.574	34.4931	95.0468
	ENSG00000095066	HOOK2	29.8957	46.6024	62.87	46.456		ENSG00000095794	CREM	12.3472	2.1969	1.93925	5.49444		ENSG00000096093	EFHC1	6.2891	15.7463	12.7101	11.5818		ENSG00000159176	CSRP1	62.9376	216.257	5.82071	95.0051
	ENSG00000095139	ARCN1	119.041	30.3564	49.3175	66.2382		ENSG00000095906	NUBP2	47.2589	33.8337	2.41214	27.8349		ENSG00000096384	HSP90AB1	1196.34	36.5359	162.316	465.063		ENSG00000168159	RNF187	107.151	81.5537	96.308	95.0044
	ENSG00000095209	TMEM38B	46.8756	60.9612	21.204	43.0136		ENSG00000095917	TPSD1	2.12403	41.5691	31.5514	25.0815		ENSG00000096401	CDC5L	31.6235	26.68	4.4687	20.9241		ENSG00000168488	ATXN2L	243.758	17.8751	23.2353	94.9563
	ENSG00000095261	PSMD5	29.0667	47.0433	13.5902	29.9001		ENSG00000095951	HIVEP1	2.5014	16.3877	39.9928	19.6273		ENSG00000096433	ITPR3	12.7707	7.12903	6.94022	8.94666		ENSG00000171365	CLCN5	8.32363	81.5136	194.995	94.9441
	ENSG00000095303	PTGS1	61.756	20.2785	97.5267	59.8538		ENSG00000096060	FKBP5	32.7146	26.9448	17.4213	25.6935		ENSG00000096654	ZNF184	6.87487	1108.27	2.35134	372.498		ENSG00000174996	KLC2	15.2952	140.363	129.051	94.9029
	ENSG00000095319	NUP188	47.0961	13.4295	9.70888	23.4115		ENSG00000096063	SRPK1	42.0792	22.9399	26.6587	30.5593		ENSG00000096717	SIRT1	10.7527	30.4924	27.4039	22.883		ENSG00000163818	LZTFL1	8.96246	254.336	21.3005	94.8663
	ENSG00000095321	CRAT	18.779	94.429	41.2212	51.4764		ENSG00000096070	BRPF3	15.9158	6.28469	25.2698	15.8234		ENSG00000096746	HNRNPH3	142.676	10.1056	31.1672	61.3162		ENSG00000205309	NT5M	15.9953	259.859	8.59271	94.8156
	ENSG00000095370	SH2D3C	13.3175	9.16986	16.1353	12.8742		ENSG00000096080	MRPS18A	30.6888	1129.86	7.42542	389.326		ENSG00000096872	IFT74	4.89702	5.90826	29.3629	13.3894		ENSG00000180817	PPA1	251.927	7.81563	24.6621	94.8017
	ENSG00000095380	NANS	103.123	40.067	14.0274	52.4058		ENSG00000096092	TMEM14A	23.0764	34.1312	1125.28	394.163		ENSG00000096968	JAK2	5.32091	9.33795	16.688	10.4489		ENSG00000160703	NLRX1	7.16748	133.428	143.802	94.7991
	ENSG00000095383	TBC1D2	10.1496	17.4073	8.72115	12.0927		ENSG00000096093	EFHC1	6.91829	10.7097	33.1095	16.9125		ENSG00000096996	IL12RB1	2.45325	175.493	332.816	170.254		ENSG00000117298	ECE1	6.0722	167.796	110.208	94.6921
	ENSG00000095485	CWF19L1	38.109	13.6415	106.023	52.5911		ENSG00000096384	HSP90AB1	1099.13	5.63593	10.1799	371.649		ENSG00000097007	ABL1	23.5293	6.97825	24.6922	18.3999		ENSG00000175309	PHYKPL	27.9043	220.06	35.9453	94.6365
	ENSG00000095564	BTAF1	17.4697	8.85469	12.5143	12.9462		ENSG00000096401	CDC5L	33.0205	11.8607	5.93407	16.9384		ENSG00000097021	ACOT7	25.6816	5.70914	4.35438	11.915		ENSG00000168393	DTYMK	34.7451	166.638	82.5093	94.6307
	ENSG00000095574	IKZF5	14.0776	1.262	55.1069	23.4822		ENSG00000096433	ITPR3	10.1503	181.086	11.0853	67.4406		ENSG00000097033	SH3GLB1	31.3041	2.48914	28.5641	20.7858		ENSG00000178715	-	4.41055	153.909	125.472	94.5972
	ENSG00000095739	BAMBI	9.00067	89.1089	1.69814	33.2692		ENSG00000096654	ZNF184	5.13567	5.23617	181.856	64.0759		ENSG00000097046	CDC7	16.5298	27.2063	26.3418	23.3593		ENSG00000087088	BAX	144.142	105.255	34.3004	94.5658
	ENSG00000095787	WAC	98.627	15.0485	3.17995	38.9518		ENSG00000096717	SIRT1	11.2579	6.05065	5.43363	7.58072		ENSG00000099194	SCD	345.927	29.6082	5.25976	126.932		ENSG00000182544	MFSD5	20.0686	58.4532	205.091	94.5374
	ENSG00000095794	CREM	15.0592	55.1869	48.9503	39.7321		ENSG00000096746	HNRNPH3	179.982	2.32748	5.95029	62.7532		ENSG00000099203	TMED1	31.1928	28.7794	28.8806	29.6176		ENSG00000101084	RAB5IF	144.59	22.724	116.232	94.5156
	ENSG00000095906	NUBP2	59.0463	1.88671	70.6896	43.8742		ENSG00000096872	IFT74	4.71219	21.8115	2.46046	9.66139		ENSG00000099204	ABLIM1	5.92662	17.6818	75.2358	32.9481		ENSG00000148700	ADD3	7.37714	3.88656	272.222	94.4952
	ENSG00000095917	TPSD1	1.97409	2.67518	30.9574	11.8689		ENSG00000096968	JAK2	6.0291	18.8342	21.1308	15.3314		ENSG00000099219	ERMP1	29.5877	338.701	14.5008	127.597		ENSG00000175137	SH3BP5L	28.7376	52.6704	201.762	94.3898
	ENSG00000095951	HIVEP1	2.8742	49.4557	79.813	44.0476		ENSG00000096996	IL12RB1	2.16755	32.5619	19.6905	18.14		ENSG00000099246	RAB18	16.9222	25.2401	14.2162	18.7928		ENSG00000165629	ATP5F1C	190.551	41.3491	51.1311	94.3436
	ENSG00000096060	FKBP5	48.976	71.3087	25.696	48.6602		ENSG00000097007	ABL1	22.1851	18.5358	31.2136	23.9781		ENSG00000099250	NRP1	3.92901	5.59756	150.25	53.259		ENSG00000147586	MRPS28	14.7364	16.478	251.806	94.3401
	ENSG00000096063	SRPK1	68.8505	34.3274	5.07741	36.0851		ENSG00000097021	ACOT7	26.137	1.49433	19.2414	15.6242		ENSG00000099290	WASHC2A	34.0669	30.8979	22.3616	29.1088		ENSG00000010626	LRRC23	7.15717	268.784	6.94811	94.2964
	ENSG00000096070	BRPF3	31.532	82.7401	1336.11	483.46		ENSG00000097033	SH3GLB1	31.2943	303.078	1.41241	111.928		ENSG00000099308	MAST3	47.1762	22.3674	2.34502	23.9629		ENSG00000274641	H2BC17	2.39809	278.821	1.64211	94.2871
	ENSG00000096080	MRPS18A	80.6247	24.4706	42.6837	49.2597		ENSG00000097046	CDC7	18.306	20.6182	303.595	114.173		ENSG00000099326	MZF1	12.2129	4.84897	112.984	43.3485		ENSG00000125810	CD93	211.58	52.1035	18.9461	94.2099
	ENSG00000096092	TMEM14A	25.3711	5.93688	17.2626	16.1902		ENSG00000099139	PCSK5	1.31237	4.38834	21.9639	9.22153		ENSG00000099330	OCEL1	10.7244	27.9216	38.4499	25.6986		ENSG00000167460	TPM4	266.095	4.53129	11.9347	94.187
	ENSG00000096093	EFHC1	5.02613	1344.62	6.80571	452.149		ENSG00000099194	SCD	299.725	32.8107	3.15186	111.896		ENSG00000099331	MYO9B	162.868	80.1208	1.4738	81.4875		ENSG00000169871	TRIM56	78.9585	49.7033	153.755	94.1388
	ENSG00000096384	HSP90AB1	1319.04	44.4865	16.5606	460.03		ENSG00000099203	TMED1	21.0377	22.4655	31.8568	25.12		ENSG00000099337	KCNK6	21.7757	15.6475	32.3605	23.2612		ENSG00000089248	ERP29	217.989	62.1066	2.05672	94.0507
	ENSG00000096401	CDC5L	42.3144	16.5051	212.84	90.5531		ENSG00000099204	ABLIM1	4.93705	4.2391	23.0266	10.7343		ENSG00000099341	PSMD8	162.979	15.2305	37.419	71.8763		ENSG00000135424	ITGA7	38.8272	4.66018	238.654	94.0472
	ENSG00000096433	ITPR3	16.4961	7.59474	8.73309	10.9413		ENSG00000099219	ERMP1	33.9933	31.3283	3.84829	23.0566		ENSG00000099364	FBXL19	33.3239	158.208	175.652	122.395		ENSG00000145494	NDUFS6	242.019	37.2777	2.81191	94.0363
	ENSG00000096654	ZNF184	6.72358	17.8518	6.61085	10.3954		ENSG00000099246	RAB18	27.1344	52.1857	1.45563	26.9252		ENSG00000099377	HSD3B7	2.41845	21.1916	77.8447	33.8182		ENSG00000254854	NECTIN1-DT	2.82737	4.14214	274.995	93.9881
	ENSG00000096717	SIRT1	18.4897	196.117	2.51683	72.3744		ENSG00000099250	NRP1	4.22735	13.0181	30.2734	15.8396		ENSG00000099381	SETD1A	32.4433	2.01886	237.723	90.7283		ENSG00000143314	MRPL24	80.3636	165.754	35.6643	93.9272
	ENSG00000096746	HNRNPH3	194.046	11.4692	34.3973	79.9707		ENSG00000099290	WASHC2A	30.5124	12.5175	50.8386	31.2895		ENSG00000099385	BCL7C	37.0708	164.406	18.6725	73.383		ENSG00000289727	-	3.56569	10.4427	267.558	93.8554
	ENSG00000096872	IFT74	9.13618	6.26597	53.254	22.8854		ENSG00000099308	MAST3	79.438	169.355	11.5714	86.7881		ENSG00000099622	CIRBP	157.709	37.6302	147.641	114.327		ENSG00000158417	EIF5B	184.171	12.6388	84.4	93.7366
	ENSG00000096968	JAK2	5.8829	2.20645	36.1421	14.7438		ENSG00000099326	MZF1	12.9654	21.7561	11.8767	15.5327		ENSG00000099624	ATP5F1D	51.4333	2.51924	229.192	94.3815		ENSG00000143653	SCCPDH	143.9	9.60001	127.677	93.7259
	ENSG00000096996	IL12RB1	2.67748	33.4261	28.1706	21.4247		ENSG00000099330	OCEL1	14.3	1.19204	169.244	61.5788		ENSG00000099783	HNRNPM	209.295	32.5163	55.1643	98.9919		ENSG00000139428	MMAB	8.0811	269.216	3.45416	93.5839
	ENSG00000097007	ABL1	35.975	53.2962	1.29073	30.1873		ENSG00000099331	MYO9B	166.624	96.1165	20.8162	94.5189		ENSG00000099785	MARCHF2	14.6724	43.84	76.5649	45.0258		ENSG00000204469	PRRC2A	248.627	21.8585	10.25	93.5786
	ENSG00000097021	ACOT7	53.6103	34.9282	1.38482	29.9744		ENSG00000099337	KCNK6	23.6252	26.3107	1.26852	17.0681		ENSG00000099795	NDUFB7	119.381	140.018	14.5558	91.3182		ENSG00000141522	ARHGDIA	187.594	33.0574	60.01	93.5537
	ENSG00000097033	SH3GLB1	35.221	27.2201	366.76	143.067		ENSG00000099338	CATSPERG	1.29211	1.77472	113.225	38.7641		ENSG00000099797	TECR	242.067	75.3649	105.905	141.112		ENSG00000143545	RAB13	93.2681	7.7997	179.533	93.5337
	ENSG00000097046	CDC7	27.5571	1.38926	30.5835	19.8433		ENSG00000099341	PSMD8	102.048	32.5995	20.4194	51.6891		ENSG00000099800	TIMM13	47.3022	219.89	41.6912	102.961		ENSG00000138185	ENTPD1	12.9739	259.974	7.52815	93.492
	ENSG00000097096	SYDE2	1.45379	1.47136	9.82138	4.24884		ENSG00000099364	FBXL19	22.6827	27.4549	1.9267	17.3547		ENSG00000099804	CDC34	57.4665	16.5121	15.2362	29.7382		ENSG00000283580	-	2.18572	4.08162	274.059	93.4421
	ENSG00000099139	PCSK5	1.43038	372.876	33.0402	135.782		ENSG00000099377	HSD3B7	2.08487	126.001	30.8069	52.9641		ENSG00000099810	MTAP	14.3265	161.341	94.4585	90.0419		ENSG00000122435	TRMT13	13.9039	38.1665	228.079	93.3831
	ENSG00000099194	SCD	362.349	29.1301	29.3347	140.271		ENSG00000099381	SETD1A	30.9987	76.6715	28.89	45.5201		ENSG00000099817	POLR2E	69.2216	210.125	15.1857	98.1774		ENSG00000172531	PPP1CA	199.954	46.8266	33.0961	93.2923
	ENSG00000099203	TMED1	29.575	9.01826	6.88714	15.1601		ENSG00000099385	BCL7C	26.0774	238.677	123.935	129.563		ENSG00000099821	POLRMT	32.6482	57.265	2.75005	30.8877		ENSG00000092330	TINF2	14.0437	254.357	11.2089	93.2033
	ENSG00000099204	ABLIM1	6.05473	33.0963	30.6569	23.2693		ENSG00000099622	CIRBP	122.726	18.3152	71.8901	70.9772		ENSG00000099849	RASSF7	13.0395	39.9402	39.7663	30.9153		ENSG00000112701	SENP6	27.0144	13.6271	238.766	93.1359
	ENSG00000099219	ERMP1	30.9216	32.1071	65.4009	42.8099		ENSG00000099624	ATP5F1D	83.0973	135.997	269.562	162.885		ENSG00000099860	GADD45B	93.8966	13.9517	11.0545	39.6343		ENSG00000140534	TICRR	10.3938	234.126	34.8048	93.1083
	ENSG00000099246	RAB18	23.0604	7.26376	12.6171	14.3137		ENSG00000099783	HNRNPM	273.685	186.437	16.3914	158.838		ENSG00000099864	PALM	13.5161	83.1556	134.696	77.1224		ENSG00000129007	CALML4	12.1398	256.369	10.7829	93.0971
	ENSG00000099250	NRP1	7.85926	30.7626	14.9359	17.8526		ENSG00000099785	MARCHF2	16.2611	28.5773	143.431	62.7565		ENSG00000099866	MADCAM1	4.05948	40.4373	18.992	21.1629		ENSG00000163902	RPN1	259.777	10.0467	9.27728	93.0338
	ENSG00000099290	WASHC2A	30.9283	62.6661	146.809	80.1344		ENSG00000099795	NDUFB7	133.013	30.7435	199.625	121.127		ENSG00000099875	MKNK2	69.0963	12.2241	11.2022	30.8409		ENSG00000138286	FAM149B1	14.0744	11.8465	253.125	93.0154
	ENSG00000099308	MAST3	64.5407	12.8484	19.9463	32.4451		ENSG00000099797	TECR	190.934	14.4164	33.7036	79.6847		ENSG00000099889	ARVCF	1.19571	102.975	64.2761	56.149		ENSG00000130803	ZNF317	37.381	217.513	23.9104	92.9346
	ENSG00000099326	MZF1	12.8971	10.6301	1.01286	8.18004		ENSG00000099800	TIMM13	36.8652	70.8343	30.6996	46.133		ENSG00000099899	TRMT2A	15.884	15.8197	25.246	18.9832		ENSG00000090013	BLVRB	219.771	51.0421	7.72423	92.8458
	ENSG00000099330	OCEL1	14.9592	144.704	253.956	137.873		ENSG00000099804	CDC34	59.1937	38.1231	12.111	36.4759		ENSG00000099901	RANBP1	121.221	3.4498	39.6578	54.7761		ENSG00000148824	MTG1	9.35609	259.103	10.0631	92.8408
	ENSG00000099331	MYO9B	147.647	21.5799	32.9909	67.4058		ENSG00000099810	MTAP	11.9893	13.8858	80.7095	35.5282		ENSG00000099904	ZDHHC8	15.8381	48.9834	18.0172	27.6129		ENSG00000126214	KLC1	67.9553	184.957	25.3682	92.7602
	ENSG00000099337	KCNK6	20.3481	1.33226	1.49985	7.72673		ENSG00000099817	POLR2E	70.1225	89.9904	33.8702	64.661		ENSG00000099910	KLHL22	10.3251	1.93641	45.6752	19.3122		ENSG00000132475	H3-3B	194.598	44.2366	39.3491	92.7279
	ENSG00000099338	CATSPERG	1.0041	231.123	35.9297	89.3522		ENSG00000099821	POLRMT	36.7374	12.4212	11.0279	20.0622		ENSG00000099917	MED15	68.4325	15.1309	1.48836	28.3506		ENSG00000172366	MCRIP2	48.9287	4.13751	225.082	92.7162
	ENSG00000099341	PSMD8	208.026	44.0611	46.2406	99.4426		ENSG00000099849	RASSF7	13.876	2.18713	86.6772	34.2468		ENSG00000099940	SNAP29	23.3353	145.16	24.3273	64.2742		ENSG00000135506	OS9	251.533	7.1574	19.2344	92.6417
	ENSG00000099364	FBXL19	44.2007	1.63422	176.339	74.0581		ENSG00000099860	GADD45B	88.722	64.4579	11.2181	54.7994		ENSG00000099942	CRKL	44.3841	15.0303	6.56694	21.9938		ENSG00000118600	RXYLT1	3.5975	36.6749	237.393	92.555
	ENSG00000099377	HSD3B7	1.73368	34.1511	102.588	46.1577		ENSG00000099864	PALM	13.6549	1.24203	2.62559	5.84085		ENSG00000099949	LZTR1	17.5184	7.97908	70.3486	31.9487		ENSG00000129103	SUMF2	211.363	53.1423	13.1311	92.5455
	ENSG00000099381	SETD1A	36.1803	44.9101	277.17	119.42		ENSG00000099866	MADCAM1	2.43087	11.5949	59.7622	24.596		ENSG00000099956	SMARCB1	43.6771	71.4191	1.74434	38.9468		ENSG00000141367	CLTC	76.8018	183.504	17.2964	92.534
	ENSG00000099385	BCL7C	49.3647	171.338	16.4478	79.05		ENSG00000099875	MKNK2	46.4016	116.3	1.71497	54.8055		ENSG00000099968	BCL2L13	28.1289	26.7899	33.7532	29.5574		ENSG00000119280	C1orf198	9.791	214.754	53.0318	92.5256
	ENSG00000099622	CIRBP	182.737	93.4852	178.345	151.522		ENSG00000099889	ARVCF	1.37435	15.4312	11.7948	9.53344		ENSG00000099974	DDTL	3.98214	41.3912	12.9804	19.4513		ENSG00000109062	NHERF1	126.146	23.8679	127.558	92.5242
	ENSG00000099624	ATP5F1D	107.148	270.469	181.13	186.249		ENSG00000099899	TRMT2A	10.3946	9.18226	114.525	44.7008		ENSG00000099977	DDT	63.5697	17.2143	73.9656	51.5832		ENSG00000137198	GMPR	22.495	42.1106	212.778	92.4611
	ENSG00000099783	HNRNPM	291.014	17.8632	68.5246	125.801		ENSG00000099901	RANBP1	117.375	58.7047	13.5471	63.2091		ENSG00000099985	OSM	2.01137	56.6086	3.94581	20.8553		ENSG00000100350	FOXRED2	44.8678	9.93082	222.434	92.4109
	ENSG00000099785	MARCHF2	17.3504	176.79	46.7676	80.3028		ENSG00000099904	ZDHHC8	14.0147	27.0476	9.6914	16.9179		ENSG00000099991	CABIN1	33.4135	1.31429	4.7267	13.1515		ENSG00000198720	ANKRD13B	6.32696	268.195	2.65887	92.3935
	ENSG00000099795	NDUFB7	192.443	181.837	23.4518	132.577		ENSG00000099910	KLHL22	9.67259	40.1079	58.9365	36.239		ENSG00000099992	TBC1D10A	11.9389	24.0432	1.5151	12.4991		ENSG00000129347	KRI1	84.8457	7.95438	184.264	92.3548
	ENSG00000099797	TECR	181.293	74.9734	88.7368	115.001		ENSG00000099917	MED15	59.199	12.6209	26.9431	32.921		ENSG00000099995	SF3A1	79.9145	5.25029	14.6211	33.262		ENSG00000143198	MGST3	218.537	53.4119	5.08632	92.345
	ENSG00000099800	TIMM13	54.9685	90.3199	45.8823	63.7236		ENSG00000099940	SNAP29	27.1197	45.5229	38.9203	37.1876		ENSG00000099998	GGT5	3.07615	69.0423	10.5821	27.5668		ENSG00000105186	ANKRD27	101.439	26.5617	148.654	92.2181
	ENSG00000099804	CDC34	93.5025	23.0335	1.21759	39.2512		ENSG00000099942	CRKL	39.7885	23.7632	13.8497	25.8004		ENSG00000099999	RNF215	2.77396	2.99321	3.78219	3.18312		ENSG00000131171	SH3BGRL	199.23	47.2172	30.1841	92.2104
	ENSG00000099810	MTAP	25.1617	89.7321	13.0389	42.6442		ENSG00000099949	LZTR1	14.9245	5.42728	43.8282	21.3933		ENSG00000100003	SEC14L2	5.13977	30.3601	3.44473	12.9815		ENSG00000106105	GARS1	223.666	1.59902	51.1839	92.1497
	ENSG00000099817	POLR2E	82.9683	43.8566	71.6252	66.15		ENSG00000099956	SMARCB1	46.6386	69.4102	23.6359	46.5616		ENSG00000100014	SPECC1L	20.5754	9.49354	61.9115	30.6601		ENSG00000168792	ABHD15	5.87644	46.9875	223.377	92.0804
	ENSG00000099821	POLRMT	47.24	11.8859	16.4527	25.1929		ENSG00000099968	BCL2L13	22.4078	1.74318	4.64861	9.59987		ENSG00000100023	PPIL2	11.5577	73.654	83.648	56.2866		ENSG00000198039	ZNF273	12.1873	20.5096	243.431	92.0426
	ENSG00000099849	RASSF7	14.5539	66.0876	1.55679	27.3994		ENSG00000099974	DDTL	6.29862	29.3858	65.9005	33.8617		ENSG00000100024	UPB1	3.13232	3.4055	38.1122	14.8833		ENSG00000142039	CCDC97	25.5129	245.307	4.95723	91.9257
	ENSG00000099860	GADD45B	62.0321	15.6895	89.4072	55.7096		ENSG00000099977	DDT	66.2425	9.61995	2.1065	25.9896		ENSG00000100027	YPEL1	2.22952	5.78176	34.7415	14.2509		ENSG00000148834	GSTO1	224.957	42.7345	8.03426	91.9085
	ENSG00000099864	PALM	16.3611	1.41828	2.79871	6.85936		ENSG00000099985	OSM	1.78644	71.0559	29.5925	34.1449		ENSG00000100028	SNRPD3	67.3835	1.48403	27.6813	32.1829		ENSG00000159352	PSMD4	215.082	40.1388	20.4454	91.8888
	ENSG00000099875	MKNK2	89.6965	103.545	26.4997	73.2472		ENSG00000099991	CABIN1	31.1894	2.77377	4.73862	12.9006		ENSG00000100029	PES1	81.9267	16.4249	1.14121	33.1643		ENSG00000141968	VAV1	90.1471	182.863	2.38039	91.7969
	ENSG00000099889	ARVCF	2.84862	3.08452	234.632	80.1884		ENSG00000099992	TBC1D10A	8.8259	3.89369	71.2833	28.001		ENSG00000100030	MAPK1	35.2679	10.2093	22.3473	22.6082		ENSG00000126602	TRAP1	64.9816	48.9408	161.446	91.7894
	ENSG00000099899	TRMT2A	22.027	23.9144	23.7513	23.2309		ENSG00000099995	SF3A1	71.8068	1.4513	3.55606	25.6047		ENSG00000100031	GGT1	32.1472	2.31233	26.7918	20.4171		ENSG00000066336	SPI1	184.607	44.3378	46.2292	91.7247
	ENSG00000099901	RANBP1	250.959	212.658	16.9329	160.184		ENSG00000099998	GGT5	2.52839	17.9911	4.97538	8.49829		ENSG00000100034	PPM1F	30.0779	6.11808	10.4839	15.56		ENSG00000100360	IFT27	42.1734	213.316	19.5433	91.6777
	ENSG00000099904	ZDHHC8	20.1969	23.1676	60.6128	34.6591		ENSG00000099999	RNF215	3.61458	11.2705	1.11287	5.33266		ENSG00000100038	TOP3B	29.7898	63.3583	86.0732	59.7404		ENSG00000169957	ZNF768	80.9635	186.028	7.86124	91.6175
	ENSG00000099910	KLHL22	14.8905	12.9574	35.9194	21.2558		ENSG00000100003	SEC14L2	2.17361	2.81498	16.2249	7.07116		ENSG00000100055	CYTH4	25.6341	79.765	42.2722	49.2238		ENSG00000077312	SNRPA	108.506	140.146	26.1365	91.5959
	ENSG00000099917	MED15	62.8732	58.4476	56.685	59.3353		ENSG00000100014	SPECC1L	16.6306	3.857	9.9438	10.1438		ENSG00000100056	ESS2	10.7686	37.1547	8.76687	18.8967		ENSG00000067167	TRAM1	93.16	80.4634	100.823	91.4821
	ENSG00000099940	SNAP29	36.0132	35.359	19.0596	30.1439		ENSG00000100023	PPIL2	11.6143	68.2333	2.1581	27.3352		ENSG00000100060	MFNG	121.424	37.6326	43.047	67.3678		ENSG00000119707	RBM25	202.684	31.5942	40.1169	91.4649
	ENSG00000099942	CRKL	58.6186	59.7652	80.2924	66.2254		ENSG00000100024	UPB1	2.52927	79.4465	3.98028	28.652		ENSG00000100075	SLC25A1	41.9468	23.5947	22.0387	29.1934		ENSG00000124942	AHNAK	44.3874	211.463	18.4525	91.4342
	ENSG00000099949	LZTR1	20.7508	21.6756	1.3362	14.5875		ENSG00000100027	YPEL1	3.17288	33.3935	67.963	34.8431		ENSG00000100077	GRK3	9.80474	24.6366	132.356	55.599		ENSG00000101444	AHCY	222.597	35.1314	16.5208	91.4164
	ENSG00000099956	SMARCB1	96.5413	91.9052	37.4285	75.2917		ENSG00000100028	SNRPD3	67.2529	26.2851	77.1404	56.8928		ENSG00000100083	GGA1	48.4511	19.254	999.534	355.746		ENSG00000106397	PLOD3	268.948	3.38029	1.74502	91.3577
	ENSG00000099958	DERL3	2.61746	1.58522	6.91176	3.70481		ENSG00000100029	PES1	78.8402	26.2058	35.6579	46.9013		ENSG00000100084	HIRA	22.862	9.42571	47.7751	26.6876		ENSG00000115241	PPM1G	187.063	33.2566	53.5352	91.2848
	ENSG00000099968	BCL2L13	35.8317	37.4742	70.1341	47.8133		ENSG00000100030	MAPK1	35.3781	20.3636	28.0803	27.9407		ENSG00000100092	SH3BP1	115.203	2.52423	14.6979	44.1418		ENSG00000138069	RAB1A	170.301	29.2001	74.3317	91.2776
	ENSG00000099974	DDTL	6.34818	6.34846	4.56138	5.75267		ENSG00000100031	GGT1	27.9646	21.5629	27.9245	25.8173		ENSG00000100097	LGALS1	994.742	115.114	8.80554	372.887		ENSG00000076513	ANKRD13A	36.6851	109.504	127.45	91.2131
	ENSG00000099977	DDT	83.3996	69.844	33.4966	62.2467		ENSG00000100034	PPM1F	28.8595	8.96227	17.9106	18.5774		ENSG00000100099	HPS4	60.7549	43.3015	9.98457	38.0136		ENSG00000111206	FOXM1	105.144	29.1696	139.217	91.1768
	ENSG00000099985	OSM	4.16511	4.34818	10.6354	6.38289		ENSG00000100038	TOP3B	19.9144	82.969	19.3915	40.7583		ENSG00000100100	PIK3IP1	13.4259	9.5897	7.14787	10.0545		ENSG00000114956	DGUOK	78.5665	189.555	5.21617	91.1127
	ENSG00000099991	CABIN1	39.1144	35.2799	91.9948	55.463		ENSG00000100055	CYTH4	22.6854	32.3429	9.07582	21.3681		ENSG00000100104	SRRD	7.10464	1.32743	26.8889	11.7737		ENSG00000166595	CIAO2B	87.2416	114.483	71.5814	91.1019
	ENSG00000099992	TBC1D10A	11.6976	10.3785	1.67675	7.91761		ENSG00000100056	ESS2	9.30938	8.83431	88.9396	35.6944		ENSG00000100105	PATZ1	12.8978	44.3082	12.0934	23.0998		ENSG00000138385	SSB	266.129	3.99251	3.14789	91.0897
	ENSG00000099995	SF3A1	91.4695	94.1652	5.06089	63.5652		ENSG00000100060	MFNG	90.4256	38.0716	31.2108	53.236		ENSG00000100106	TRIOBP	10.393	23.2111	3.0473	12.2171		ENSG00000136114	THSD1	7.62126	220.308	45.3271	91.0856
	ENSG00000099998	GGT5	1.87065	1.70042	28.0097	10.5269		ENSG00000100075	SLC25A1	34.9339	14.6554	8.95374	19.5143		ENSG00000100109	TFIP11	34.2749	119.48	1.9323	51.8957		ENSG00000244038	DDOST	261.563	3.19357	8.23792	90.9981
	ENSG00000099999	RNF215	6.3866	6.15518	19.2595	10.6004		ENSG00000100077	GRK3	8.87891	108.532	43.2718	53.5609		ENSG00000100116	GCAT	7.18743	1017.94	22.9325	349.355		ENSG00000117448	AKR1A1	55.8763	8.34595	208.46	90.894
	ENSG00000100003	SEC14L2	1.10535	1.23328	3.54696	1.96186		ENSG00000100083	GGA1	42.4498	864.172	16.5266	307.716		ENSG00000100121	GGTLC2	1.86512	44.6844	1094.25	380.266		ENSG00000150510	FAM124A	2.189	250.835	19.5485	90.8576
	ENSG00000100014	SPECC1L	29.4483	28.6843	3.63944	20.5907		ENSG00000100084	HIRA	21.6516	49.7806	109.965	60.4656		ENSG00000100122	CRYBB1	2.00767	13.7154	76.2208	30.648		ENSG00000115806	GORASP2	82.2044	14.2758	176.013	90.831
	ENSG00000100023	PPIL2	19.0181	20.4113	90.0878	43.1724		ENSG00000100092	SH3BP1	119.35	15.5956	866.322	333.756		ENSG00000100124	ANKRD54	28.108	9.34096	11.6743	16.3744		ENSG00000105185	PDCD5	238.747	11.4286	22.2316	90.8026
	ENSG00000100024	UPB1	4.07233	3.96758	119.305	42.4482		ENSG00000100097	LGALS1	872.317	7.63588	50.6529	310.202		ENSG00000100129	EIF3L	897.637	12.8144	46.5182	318.99		ENSG00000079459	FDFT1	255.361	7.04245	9.58236	90.6621
	ENSG00000100027	YPEL1	5.59893	3.12294	54.1047	20.9422		ENSG00000100099	HPS4	46.3002	12.4642	15.2251	24.6632		ENSG00000100138	SNU13	78.3999	15.6515	2.27225	32.1079		ENSG00000181544	FANCB	3.45798	65.1126	203.126	90.5654
	ENSG00000100028	SNRPD3	92.6919	93.7808	29.4311	71.9679		ENSG00000100100	PIK3IP1	14.6011	12.9542	6.92319	11.4929		ENSG00000100139	MICALL1	10.8002	30.1964	8.76924	16.5886		ENSG00000009954	BAZ1B	133.241	126.674	11.7027	90.539
	ENSG00000100029	PES1	121.326	123.14	31.6744	92.0468		ENSG00000100104	SRRD	6.5257	28.3493	10.8064	15.2271		ENSG00000100142	POLR2F	57.2754	7.93014	1.63822	22.2813		ENSG00000163126	ANKRD23	5.95284	7.01139	258.468	90.4773
	ENSG00000100030	MAPK1	57.1475	56.0537	1.27447	38.1585		ENSG00000100105	PATZ1	11.2947	5.54095	11.9429	9.59287		ENSG00000100147	CCDC134	4.95401	1.97362	25.6552	10.8609		ENSG00000127463	EMC1	38.6017	3.42542	229.366	90.4645
	ENSG00000100031	GGT1	30.7681	29.2509	19.7608	26.5932		ENSG00000100106	TRIOBP	14.1978	2.47082	28.8385	15.169		ENSG00000100150	DEPDC5	9.09055	1.32641	42.7775	17.7315		ENSG00000117408	IPO13	37.9991	211.012	22.1841	90.3983
	ENSG00000100034	PPM1F	32.3917	33.3757	23.4609	29.7428		ENSG00000100109	TFIP11	28.0518	2.20225	5.1114	11.7885		ENSG00000100151	PICK1	2.34213	23.3933	152.408	59.3812		ENSG00000113141	IK	163.467	62.7107	44.8355	90.3377
	ENSG00000100036	SLC35E4	1.31888	1.2409	13.1834	5.24771		ENSG00000100116	GCAT	4.50087	20.2468	2.61734	9.12167		ENSG00000100162	CENPM	18.1983	1046.06	2.63758	355.633		ENSG00000101452	DHX35	7.74308	22.1704	240.921	90.278
	ENSG00000100038	TOP3B	18.6046	21.8337	150.033	63.4905		ENSG00000100121	GGTLC2	1.83646	1142.01	2.88643	382.245		ENSG00000100167	SEPTIN3	43.4064	76.3628	20.8525	46.8739		ENSG00000104805	NUCB1	177.402	4.14791	89.0383	90.1961
	ENSG00000100055	CYTH4	20.5341	22.4741	45.1429	29.3837		ENSG00000100122	CRYBB1	2.99029	71.4992	22.881	32.4568		ENSG00000100201	DDX17	155.876	8.64385	13.6698	59.3964		ENSG00000164611	PTTG1	120.002	48.0021	102.377	90.1268
	ENSG00000100056	ESS2	11.3704	9.91744	12.5146	11.2675		ENSG00000100124	ANKRD54	22.4029	10.4655	1217	416.623		ENSG00000100206	DMC1	2.68353	57.7655	13.4391	24.6294		ENSG00000076928	ARHGEF1	194.401	13.8773	62.0815	90.1198
	ENSG00000100060	MFNG	154.788	156.591	57.9956	123.125		ENSG00000100129	EIF3L	1090.67	50.0868	78.9001	406.552		ENSG00000100207	TCF20	18.3476	2.87016	47.4693	22.8957		ENSG00000131507	NDFIP1	37.767	9.35906	223.233	90.1196
	ENSG00000100075	SLC25A1	47.7633	44.9333	28.2326	40.3097		ENSG00000100138	SNU13	80.5199	4.08997	10.2951	31.635		ENSG00000100209	HSCB	16.3806	5.32666	68.7479	30.1517		ENSG00000125995	ROMO1	59.6877	121.791	88.7948	90.0911
	ENSG00000100077	GRK3	11.8053	12.0509	96.1204	39.9922		ENSG00000100139	MICALL1	10.5959	5.55137	57.6543	24.6005		ENSG00000100211	CBY1	14.8252	1.95753	69.3388	28.7072		ENSG00000251141	MRPS30-DT	5.37791	1.75924	263.048	90.0616
	ENSG00000100083	GGA1	58.6433	56.0186	1109.55	408.072		ENSG00000100142	POLR2F	49.3711	2.49619	4.8016	18.8896		ENSG00000100216	TOMM22	49.7352	18.8443	29.6192	32.7329		ENSG00000134057	CCNB1	88.8562	121.28	59.7645	89.9669
	ENSG00000100084	HIRA	25.7213	31.1674	74.6889	43.8592		ENSG00000100147	CCDC134	2.81002	18.9875	5.08988	8.96246		ENSG00000100219	XBP1	123.216	41.5501	73.5445	79.4368		ENSG00000164402	SEPTIN8	18.3583	179.128	71.8769	89.7877
	ENSG00000100092	SH3BP1	134.391	117.588	7.57228	86.517		ENSG00000100150	DEPDC5	5.38664	39.5646	2.8192	15.9235		ENSG00000100220	RTCB	67.5467	132.045	21.4223	73.6713		ENSG00000146731	CCT6A	200.78	51.701	16.6209	89.7006
	ENSG00000100097	LGALS1	1059.16	1093.74	12.5223	721.809		ENSG00000100151	PICK1	2.35406	145.136	18.7468	55.4124		ENSG00000100221	JOSD1	34.739	5.67624	57.1884	32.5346		ENSG00000166851	PLK1	143.787	121.723	3.55912	89.6898
	ENSG00000100099	HPS4	77.1333	77.4815	13.2608	55.9585		ENSG00000100162	CENPM	19.794	2.70655	42.9222	21.8076		ENSG00000100225	FBXO7	67.3469	23.2467	29.1469	39.9135		ENSG00000105088	OLFM2	2.41808	12.5451	254.097	89.6866
	ENSG00000100100	PIK3IP1	7.0266	7.24351	33.2201	15.8301		ENSG00000100167	SEPTIN3	39.4387	19.1832	144.287	67.6364		ENSG00000100226	GTPBP1	29.2347	13.1711	44.5291	28.9783		ENSG00000003147	ICA1	19.7479	18.9265	230.228	89.6343
	ENSG00000100104	SRRD	12.4	13.537	33.2815	19.7395		ENSG00000100201	DDX17	144.821	12.3677	3.91559	53.7014		ENSG00000100227	POLDIP3	24.6502	12.4686	163.122	66.747		ENSG00000132361	CLUH	33.9128	196.612	38.1624	89.5625
	ENSG00000100105	PATZ1	13.0705	11.5228	14.4885	13.0273		ENSG00000100206	DMC1	2.36298	12.4405	18.975	11.2595		ENSG00000100239	PPP6R2	26.0569	53.7071	43.0262	40.9301		ENSG00000204482	LST1	255.393	9.09262	4.19444	89.5602
	ENSG00000100106	TRIOBP	34.8157	32.1848	2.10672	23.0357		ENSG00000100207	TCF20	19.9887	42.2718	13.901	25.3872		ENSG00000100241	SBF1	43.2838	141.42	13.2858	65.9966		ENSG00000117308	GALE	61.6973	27.123	179.761	89.5272
	ENSG00000100109	TFIP11	35.7038	36.7665	4.01009	25.4935		ENSG00000100209	HSCB	12.801	1.31338	13.6238	9.24604		ENSG00000100242	SUN2	167.16	61.051	34.4163	87.5425		ENSG00000117362	APH1A	200.187	12.0815	56.3069	89.5251
	ENSG00000100116	GCAT	15.3364	16.7163	29.2744	20.4424		ENSG00000100211	CBY1	14.6042	122.987	46.3666	61.3192		ENSG00000100243	CYB5R3	31.9771	14.1192	23.5787	23.225		ENSG00000118816	CCNI	220.486	14.2415	33.8102	89.5125
	ENSG00000100121	GGTLC2	2.89678	2.23344	799.728	268.286		ENSG00000100216	TOMM22	45.7073	64.5292	1.12585	37.1208		ENSG00000100246	DNAL4	14.9478	73.8123	33.5969	40.7857		ENSG00000257103	LSM14A	118.425	146.33	3.39776	89.3841
	ENSG00000100122	CRYBB1	3.30297	4.87807	107.648	38.6096		ENSG00000100219	XBP1	123.947	37.0956	128.44	96.4943		ENSG00000100258	LMF2	30.766	24.3947	4.06489	19.7419		ENSG00000119403	PHF19	214.439	18.2338	35.3187	89.3304
	ENSG00000100124	ANKRD54	26.9821	29.5505	23.3046	26.6124		ENSG00000100220	RTCB	60.6515	67.368	63.9629	63.9941		ENSG00000100263	RHBDD3	27.0001	55.3903	51.7935	44.728		ENSG00000120438	TCP1	242.463	3.48495	22.028	89.3251
	ENSG00000100129	EIF3L	772.318	689.164	71.1337	510.872		ENSG00000100221	JOSD1	31.9286	13.3564	31.3125	25.5325		ENSG00000100266	PACSIN2	35.3778	23.8873	24.8939	28.053		ENSG00000126787	DLGAP5	35.4998	23.4895	208.947	89.3121
	ENSG00000100138	SNU13	107.382	107.684	7.61494	74.2269		ENSG00000100225	FBXO7	71.5997	54.4903	67.0669	64.3856		ENSG00000100271	TTLL1	2.81211	37.8173	62.1018	34.2437		ENSG00000125877	ITPA	66.4189	24.2586	177.237	89.3049
	ENSG00000100139	MICALL1	23.9819	24.27	9.22767	19.1599		ENSG00000100226	GTPBP1	24.0095	24.8064	22.6386	23.8182		ENSG00000100280	AP1B1	51.4421	165.049	23.2778	79.9228		ENSG00000115364	MRPL19	6.45697	5.40292	255.982	89.2806
	ENSG00000100142	POLR2F	63.405	67.0174	2.76299	44.3951		ENSG00000100227	POLDIP3	55.3299	36.877	52.9172	48.3747		ENSG00000100281	HMGXB4	31.6815	45.4981	16.9216	31.367		ENSG00000197258	EIF4BP6	7.41802	74.1041	186.1	89.2073
	ENSG00000100147	CCDC134	4.91113	7.75743	40.7632	17.8106		ENSG00000100239	PPP6R2	25.2873	151.269	24.3315	66.9626		ENSG00000100284	TOM1	59.7506	17.4208	3.01306	26.7282		ENSG00000124772	CPNE5	3.92566	64.1391	199.433	89.1661
	ENSG00000100150	DEPDC5	8.23883	8.22961	57.7235	24.7307		ENSG00000100241	SBF1	36.7141	43.6345	33.0132	37.7873		ENSG00000100288	CHKB	29.6706	40.3403	19.0613	29.6907		ENSG00000089060	SLC8B1	32.2634	4.78013	230.367	89.1368
	ENSG00000100151	PICK1	2.74559	2.68531	193.29	66.2403		ENSG00000100242	SUN2	149	11.7392	143.211	101.317		ENSG00000100292	HMOX1	10.3454	28.522	44.0797	27.649		ENSG00000130244	FAM98C	10.2331	244.851	12.2987	89.1278
	ENSG00000100162	CENPM	45.2279	41.1588	7.39209	31.2596		ENSG00000100243	CYB5R3	37.9896	29.3977	38.2897	35.2257		ENSG00000100294	MCAT	3.06238	32.8719	7.44093	14.4584		ENSG00000134802	SLC43A3	140.509	20.0093	106.77	89.0963
	ENSG00000100167	SEPTIN3	57.6457	60.3065	26.2182	48.0568		ENSG00000100246	DNAL4	13.212	23.2306	13.1497	16.5307		ENSG00000100296	THOC5	22.9519	2.95173	102.96	42.9545		ENSG00000088992	TESC	179.967	24.385	62.8723	89.0748
	ENSG00000100201	DDX17	185.045	191.601	13.3317	129.993		ENSG00000100258	LMF2	30.7973	40.0592	28.8545	33.237		ENSG00000100297	MCM5	40.9303	47.3886	1.41707	29.912		ENSG00000183207	RUVBL2	245.749	18.1528	3.25285	89.0517
	ENSG00000100206	DMC1	7.77119	7.71117	19.6031	11.6952		ENSG00000100263	RHBDD3	26.2243	2.91859	23.3368	17.4932		ENSG00000100299	ARSA	6.90277	24.7052	11.7928	14.4669		ENSG00000114738	MAPKAPK3	190.511	74.1847	2.45235	89.0493
	ENSG00000100207	TCF20	26.7051	26.4047	70.9095	41.3398		ENSG00000100266	PACSIN2	37.1441	46.3296	32.8353	38.7697		ENSG00000100300	TSPO	81.2042	64.137	7.87343	51.0715		ENSG00000173020	GRK2	226.8	1.91323	38.4105	89.0413
	ENSG00000100209	HSCB	13.0848	13.4665	137.085	54.5456		ENSG00000100271	TTLL1	2.40981	23.7199	2.60573	9.57847		ENSG00000100302	RASD2	1.5576	23.019	2.32596	8.96751		ENSG00000122971	ACADS	24.8625	11.978	230.239	89.0264
	ENSG00000100211	CBY1	17.7298	19.0161	97.967	44.9043		ENSG00000100280	AP1B1	47.2117	55.7921	46.2735	49.7591		ENSG00000100304	TTLL12	11.5638	16.9211	7092.07	2373.52		ENSG00000007047	MARK4	28.619	189.43	48.8169	88.9553
	ENSG00000100216	TOMM22	67.5951	71.6028	51.3543	63.5174		ENSG00000100281	HMGXB4	23.7081	28.7001	26.1499	26.186		ENSG00000100307	CBX7	12.3245	2.99956	27.8415	14.3885		ENSG00000100811	YY1	68.3244	34.402	164.12	88.9487
	ENSG00000100219	XBP1	225.264	1.66185	77.3491	101.425		ENSG00000100284	TOM1	55.6838	12.8956	54.8349	41.1381		ENSG00000100311	PDGFB	1.26556	21.081	6.72467	9.69041		ENSG00000115091	ACTR3	120.417	102.109	44.2787	88.9347
	ENSG00000100220	RTCB	102.532	209.224	20.9459	110.901		ENSG00000100288	CHKB	27.2942	2.00597	26.417	18.5724		ENSG00000100316	RPL3	7007.46	42.9453	15.0206	2355.14		ENSG00000049860	HEXB	166.681	37.262	62.8316	88.9249
	ENSG00000100221	JOSD1	54.7984	101.115	69.0685	74.994		ENSG00000100292	HMOX1	13.7491	18.719	17.1147	16.5276		ENSG00000100319	ZMAT5	24.868	7.71909	37.4361	23.3411		ENSG00000181826	RELL1	3.72778	224.517	38.437	88.894
	ENSG00000100225	FBXO7	82.807	55.3281	40.7289	59.6213		ENSG00000100294	MCAT	2.4468	33.3668	2.82063	12.8781		ENSG00000100320	RBFOX2	7.29977	115.211	50.1345	57.5485		ENSG00000115421	PAPOLG	8.94188	56.1588	201.457	88.8524
	ENSG00000100226	GTPBP1	21.205	83.0592	59.007	54.4237		ENSG00000100296	THOC5	22.9823	6.3281	33.4999	20.9368		ENSG00000100321	SYNGR1	20.4754	1.47115	13.0527	11.6664		ENSG00000100220	RTCB	64.3732	165.528	36.5692	88.8235
	ENSG00000100227	POLDIP3	63.8792	22.523	162.555	82.9858		ENSG00000100297	MCM5	30.6868	88.4806	32.2871	50.4848		ENSG00000100324	TAB1	36.4012	14.8583	26.9075	26.0557		ENSG00000145779	TNFAIP8	47.09	192.193	26.8742	88.719
	ENSG00000100239	PPP6R2	40.9855	72.2112	57.7942	56.997		ENSG00000100299	ARSA	6.99385	9.8751	7.42516	8.09804		ENSG00000100325	ASCC2	46.2329	13.4325	307.911	122.525		ENSG00000134086	VHL	101.529	9.4472	155.134	88.7035
	ENSG00000100241	SBF1	62.122	41.9253	14.4378	39.495		ENSG00000100300	TSPO	100.498	12.7385	89.6188	67.6185		ENSG00000100330	MTMR3	16.6202	3.92219	33.2148	17.9191		ENSG00000105619	TFPT	60.0745	181.789	24.2196	88.6944
	ENSG00000100242	SUN2	170.185	59.612	1.57871	77.1252		ENSG00000100304	TTLL12	10.6219	2.05339	1.47925	4.71819		ENSG00000100335	MIEF1	28.8037	6940.49	87.5702	2352.29		ENSG00000131051	RBM39	217.342	43.5135	5.08411	88.6465
	ENSG00000100243	CYB5R3	66.4496	174.315	36.8804	92.5485		ENSG00000100307	CBX7	11.9796	7058.04	9.80676	2359.94		ENSG00000100345	MYH9	319.2	37.0097	36.6805	130.964		ENSG00000112977	DAP	236.213	5.70628	23.9729	88.6307
	ENSG00000100246	DNAL4	13.9194	66.3567	32.8552	37.7104		ENSG00000100311	PDGFB	1.35588	22.7695	14.6588	12.9281		ENSG00000100347	SAMM50	35.4185	6.07676	364.428	135.308		ENSG00000143110	C1orf162	35.5069	81.3946	148.953	88.618
	ENSG00000100258	LMF2	44.4011	12.4387	40.7709	32.5369		ENSG00000100316	RPL3	7044.75	6.08497	1.26568	2350.7		ENSG00000100348	TXN2	79.2218	19.9212	6.5205	35.2212		ENSG00000105254	TBCB	64.3987	21.8386	179.495	88.5773
	ENSG00000100263	RHBDD3	32.4207	1.16262	3.56309	12.3822		ENSG00000100319	ZMAT5	26.5777	17.5219	7077.06	2373.72		ENSG00000100350	FOXRED2	38.789	36.6049	28.3564	34.5834		ENSG00000100714	MTHFD1	78.2458	2.05	185.419	88.5718
	ENSG00000100266	PACSIN2	39.8423	41.9661	65.2263	49.0115		ENSG00000100320	RBFOX2	5.60342	27.4958	25.4517	19.517		ENSG00000100353	EIF3D	382.158	55.9821	50.8689	163.003		ENSG00000104889	RNASEH2A	84.696	53.1554	127.831	88.5609
	ENSG00000100271	TTLL1	4.0055	31.9751	31.9999	22.6601		ENSG00000100321	SYNGR1	15.5291	44.1784	5.12217	21.6099		ENSG00000100354	TNRC6B	4.18924	12.005	90.2257	35.4733		ENSG00000101337	TM9SF4	125.119	120.31	19.6874	88.3721
	ENSG00000100280	AP1B1	67.6575	39.6447	46.4888	51.2637		ENSG00000100324	TAB1	28.9342	12.8543	19.1491	20.3126		ENSG00000100359	SGSM3	36.7099	31.9977	298.625	122.444		ENSG00000173113	TRMT112	190.091	42.3405	32.4761	88.3024
	ENSG00000100281	HMGXB4	34.7369	4.10346	25.6878	21.5094		ENSG00000100325	ASCC2	45.4613	29.5026	28.1069	34.3569		ENSG00000100360	IFT27	44.8849	299.082	13.436	119.134		ENSG00000129317	PUS7L	3.44974	7.78319	253.523	88.2518
	ENSG00000100284	TOM1	47.8372	64.3257	13.7384	41.9671		ENSG00000100330	MTMR3	13.2527	295.137	45.6	117.997		ENSG00000100364	KIAA0930	84.8254	32.2542	9.32786	42.1358		ENSG00000116459	ATP5PB	108.555	107.02	49.0209	88.1987
	ENSG00000100288	CHKB	26.7283	34.4639	5.79606	22.3294		ENSG00000100335	MIEF1	26.0268	29.8787	14.3794	23.4283		ENSG00000100365	NCF4	264.138	82.8424	8.90992	118.63		ENSG00000126500	FLRT1	4.85833	32.4013	227.332	88.1973
	ENSG00000100292	HMOX1	11.2647	49.3885	32.4234	31.0255		ENSG00000100345	MYH9	300.392	77.5676	28.1105	135.357		ENSG00000100368	CSF2RB	12.3458	34.9175	7.99552	18.4196		ENSG00000140525	FANCI	65.891	27.2861	171.364	88.1804
	ENSG00000100294	MCAT	6.47007	28.445	62.7268	32.5473		ENSG00000100347	SAMM50	28.1334	33.3068	292.405	117.948		ENSG00000100372	SLC25A17	9.25201	376.106	227.761	204.373		ENSG00000182606	TRAK1	68.3314	65.4051	130.755	88.1638
	ENSG00000100296	THOC5	38.3928	13.9648	7.53987	19.9658		ENSG00000100348	TXN2	50.5714	352.392	28.832	143.932		ENSG00000100376	FAM118A	8.61532	3.21882	3.79081	5.20832		ENSG00000132581	SDF2	29.758	77.5674	156.778	88.0345
	ENSG00000100297	MCM5	65.931	6.96333	124.149	65.6811		ENSG00000100350	FOXRED2	33.9108	6.89003	76.2409	39.0139		ENSG00000100379	KCTD17	4.5243	37.3547	53.0611	31.6467		ENSG00000078269	SYNJ2	9.361	152.589	102.137	88.029
	ENSG00000100299	ARSA	8.60791	32.7104	1.3966	14.2383		ENSG00000100353	EIF3D	352.335	31.041	33.1523	138.843		ENSG00000100380	ST13	220.94	47.5123	20.5957	96.3492		ENSG00000137970	RPL7P9	181.144	58.5436	24.1501	87.9458
	ENSG00000100300	TSPO	131.078	61.1247	23.5079	71.9035		ENSG00000100354	TNRC6B	7.82074	40.6089	360.407	136.279		ENSG00000100385	IL2RB	2.81544	76.8385	22.5146	34.0562		ENSG00000009413	REV3L	6.86079	8.2829	248.692	87.9452
	ENSG00000100302	RASD2	1.40048	8.33342	15.968	8.5673		ENSG00000100359	SGSM3	27.6845	77.9139	7.96883	37.8557		ENSG00000100387	RBX1	47.614	283.05	57.7949	129.486		ENSG00000174840	PDE12	8.49546	145.85	109.437	87.9274
	ENSG00000100304	TTLL12	24.6195	128.093	2.05879	51.5905		ENSG00000100360	IFT27	45.658	261.158	29.371	112.062		ENSG00000100393	EP300	23.4094	11.0344	25.8774	20.1071		ENSG00000142657	PGD	229.77	20.9745	12.9943	87.9128
	ENSG00000100307	CBX7	14.1896	1.50252	4914.26	1643.32		ENSG00000100364	KIAA0930	81.0222	11.8552	44.0283	45.6352		ENSG00000100395	L3MBTL2	24.4987	9.76158	60.4707	31.577		ENSG00000196998	WDR45	47.6007	4.98757	211.138	87.9087
	ENSG00000100311	PDGFB	2.36386	15.3499	33.5188	17.0775		ENSG00000100365	NCF4	270.122	8.6632	90.7264	123.171		ENSG00000100401	RANGAP1	80.4697	8.24509	106.855	65.1899		ENSG00000105223	PLD3	165.638	74.3149	23.6981	87.8836
	ENSG00000100316	RPL3	4886.49	14.372	11.1782	1637.35		ENSG00000100368	CSF2RB	11.6193	9.18143	238.537	86.4459		ENSG00000100403	ZC3H7B	25.5059	6.38894	5.9374	12.6108		ENSG00000147548	NSD3	56.8328	135.693	70.4493	87.6583
	ENSG00000100319	ZMAT5	33.08	2.27133	24.3681	19.9065		ENSG00000100372	SLC25A17	8.2067	3.82473	11.9711	8.00085		ENSG00000100410	PHF5A	61.2235	217.209	20.914	99.7821		ENSG00000101391	CDK5RAP1	46.4812	197.367	19.0075	87.6186
	ENSG00000100320	RBFOX2	11.7996	4927.1	39.8004	1659.57		ENSG00000100376	FAM118A	8.05709	243.653	10.5611	87.4239		ENSG00000100412	ACO2	105.221	2.01646	31.3367	46.1914		ENSG00000158186	MRAS	6.32891	34.2041	222.273	87.6019
	ENSG00000100321	SYNGR1	23.2862	35.1251	59.4563	39.2892		ENSG00000100379	KCTD17	2.89823	2.02572	8.33524	4.41973		ENSG00000100413	POLR3H	3.70154	53.7866	12.543	23.3437		ENSG00000133243	BTBD2	81.5696	7.78534	173.404	87.5863
	ENSG00000100324	TAB1	39.5935	10.7653	15.5658	21.9749		ENSG00000100380	ST13	232.914	39.6627	4.38011	92.3191		ENSG00000100416	TRMU	22.1008	23.4735	35.7903	27.1215		ENSG00000227666	CYCSP24	2.66388	253.526	6.55913	87.5829
	ENSG00000100325	ASCC2	57.2015	23.7836	49.7075	43.5642		ENSG00000100385	IL2RB	2.35963	24.2137	236.43	87.6679		ENSG00000100417	PMM1	35.2445	18.2083	19.4745	24.3091		ENSG00000168259	DNAJC7	80.384	109.947	72.417	87.5826
	ENSG00000100330	MTMR3	17.3901	40.7975	372.456	143.548		ENSG00000100387	RBX1	41.4603	20.343	2.43712	21.4135		ENSG00000100418	DESI1	13.7394	79.5697	15.0136	36.1075		ENSG00000113569	NUP155	13.8167	246.254	2.61654	87.5625
	ENSG00000100335	MIEF1	50.7929	60.0537	37.105	49.3172		ENSG00000100393	EP300	23.7812	60.8554	44.5119	43.0495		ENSG00000100422	CERK	35.6304	25.9747	65.1686	42.2579		ENSG00000104872	PIH1D1	172.161	37.8025	52.6119	87.5253
	ENSG00000100345	MYH9	387.635	15.693	92.3887	165.239		ENSG00000100395	L3MBTL2	20.8003	23.4875	24.7969	23.0282		ENSG00000100425	BRD1	14.3899	67.9436	56.2019	46.1785		ENSG00000236829	-	11.7257	2.08802	248.566	87.4598
	ENSG00000100347	SAMM50	37.8134	51.0456	67.0259	51.9616		ENSG00000100401	RANGAP1	72.3558	58.3988	19.0029	49.9192		ENSG00000100426	ZBED4	15.017	92.3547	11.7993	39.7237		ENSG00000072958	AP1M1	42.2014	99.2466	120.843	87.4304
	ENSG00000100348	TXN2	92.9632	377.192	382.722	284.293		ENSG00000100403	ZC3H7B	23.8408	97.7755	76.0652	65.8938		ENSG00000100427	MLC1	64.5826	3.54621	33.5664	33.8984		ENSG00000036054	TBC1D23	25.7999	195.006	41.444	87.4166
	ENSG00000100350	FOXRED2	67.4043	38.9809	7.79003	38.0584		ENSG00000100410	PHF5A	58.8775	3.53231	23.2137	28.5412		ENSG00000100429	HDAC10	47.4929	21.3466	36.9342	35.2579		ENSG00000005810	MYCBP2	82.3215	165.8	14.126	87.4157
	ENSG00000100353	EIF3D	381.108	65.0707	44.6841	163.621		ENSG00000100412	ACO2	95.948	17.0604	57.2051	56.7378		ENSG00000100439	ABHD4	13.7778	37.505	39.0312	30.1047		ENSG00000167004	PDIA3	220.305	6.78384	34.8529	87.314
	ENSG00000100354	TNRC6B	7.28785	67.6914	49.2576	41.4123		ENSG00000100413	POLR3H	3.65035	24.8575	98.1439	42.2172		ENSG00000100441	KHNYN	34.0134	13.6095	3222.27	1089.96		ENSG00000166925	TSC22D4	147.594	6.05996	108.252	87.3018
	ENSG00000100359	SGSM3	41.3809	395.026	77.3833	171.263		ENSG00000100416	TRMU	16.2194	10.3689	3.44182	10.01		ENSG00000100442	FKBP3	39.8039	35.2553	35.6499	36.903		ENSG00000115944	COX7A2L	151.26	38.2556	72.3825	87.2994
	ENSG00000100360	IFT27	51.96	7.26368	299.169	119.464		ENSG00000100417	PMM1	29.0381	33.0996	15.5605	25.8994		ENSG00000100445	SDR39U1	35.4359	17.9304	30.6798	28.0154		ENSG00000118363	SPCS2	57.2144	4.04927	200.539	87.2676
	ENSG00000100364	KIAA0930	78.0508	37.5664	15.1239	43.5804		ENSG00000100418	DESI1	11.2365	16.3204	22.7898	16.7822		ENSG00000100448	CTSG	3557.41	13.9002	1.86497	1191.06		ENSG00000130748	TMEM160	4.31409	38.2175	219.114	87.2153
	ENSG00000100365	NCF4	303.741	47.7155	17.2996	122.919		ENSG00000100422	CERK	33.3323	13.6652	9.90196	18.9665		ENSG00000100461	RBM23	34.714	63.6486	7.70214	35.3549		ENSG00000132676	DAP3	153.378	49.9091	58.3413	87.2094
	ENSG00000100368	CSF2RB	16.3867	68.7558	13.7893	32.9773		ENSG00000100425	BRD1	16.9181	59.4048	35.3216	37.2148		ENSG00000100462	PRMT5	34.0395	43.8699	4.33551	27.415		ENSG00000043514	TRIT1	6.93673	252.714	1.95129	87.2005
	ENSG00000100372	SLC25A17	17.5957	294.516	8.83577	106.982		ENSG00000100426	ZBED4	13.1404	41.4895	17.3291	23.9863		ENSG00000100478	AP4S1	1.19828	12.8389	19.5323	11.1898		ENSG00000104960	PTOV1	120.207	40.9197	100.446	87.1912
	ENSG00000100376	FAM118A	14.0898	16.4962	211.653	80.7464		ENSG00000100427	MLC1	58.2067	11.7134	13.0744	27.6648		ENSG00000100479	POLE2	2.0879	32.1701	5.65766	13.3052		ENSG00000232626	-	9.46165	4.82801	247.259	87.1828
	ENSG00000100379	KCTD17	6.81575	17.177	5.51984	9.83754		ENSG00000100429	HDAC10	40.5469	30.7326	57.719	42.9995		ENSG00000100483	VCPKMT	5.02928	41.5766	28.3541	24.9867		ENSG00000135476	ESPL1	14.0281	241.725	5.77324	87.1753
	ENSG00000100380	ST13	206.321	14.4918	58.3627	93.0585		ENSG00000100439	ABHD4	12.4211	38.3917	37.6969	29.5032		ENSG00000100485	SOS2	20.7891	28.815	133.999	61.201		ENSG00000006634	DBF4	36.4558	25.6488	199.354	87.153
	ENSG00000100385	IL2RB	7.35697	6.85591	33.776	15.9963		ENSG00000100441	KHNYN	32.0239	31.487	12.9632	25.4914		ENSG00000100490	CDKL1	1.87335	3424.52	42.8997	1156.43		ENSG00000140598	EFL1	16.0155	9.54036	235.829	87.1281
	ENSG00000100387	RBX1	56.5453	215.292	27.6962	99.8446		ENSG00000100442	FKBP3	38.2322	2863.15	29.7307	977.038		ENSG00000100503	NIN	24.8803	1.14456	7.80087	11.2752		ENSG00000110063	DCPS	10.7023	13.2589	237.268	87.0764
	ENSG00000100393	EP300	35.0604	5.56149	79.4326	40.0182		ENSG00000100445	SDR39U1	33.9502	28.7566	40.9474	34.5514		ENSG00000100504	PYGL	130.256	23.0535	4.19868	52.5028		ENSG00000149428	HYOU1	96.601	111.955	52.3682	86.9747
	ENSG00000100395	L3MBTL2	26.4029	58.4664	42.1802	42.3498		ENSG00000100448	CTSG	2945.72	27.9919	36.2094	1003.31		ENSG00000100519	PSMC6	46.8009	26.6846	54.1668	42.5508		ENSG00000167978	SRRM2	203.775	39.1698	17.9689	86.9713
	ENSG00000100401	RANGAP1	106.474	36.7992	82.3314	75.2014		ENSG00000100461	RBM23	28.1197	1.63627	2993.19	1007.65		ENSG00000100522	GNPNAT1	8.60208	7.36947	24.5086	13.4934		ENSG00000131094	C1QL1	1.95412	10.8578	247.782	86.8645
	ENSG00000100403	ZC3H7B	43.909	31.2277	123.124	66.0869		ENSG00000100462	PRMT5	29.4866	5.89727	34.4942	23.2927		ENSG00000100523	DDHD1	4.64184	5.13961	6.89901	5.56015		ENSG00000108465	CDK5RAP3	79.6513	126.047	54.8918	86.8632
	ENSG00000100410	PHF5A	81.31	75.2713	9.33729	55.3062		ENSG00000100478	AP4S1	1.18791	6.50499	28.3291	12.0073		ENSG00000100526	CDKN3	64.1046	19.8679	56.6962	46.8896		ENSG00000116260	QSOX1	92.1819	25.081	143.261	86.8413
	ENSG00000100412	ACO2	119.887	44.2128	20.1349	61.4115		ENSG00000100479	POLE2	7.57318	22.9922	1.7513	10.7722		ENSG00000100528	CNIH1	37.9469	2.68696	20.969	20.5343		ENSG00000147050	KDM6A	11.2252	215.192	34.0845	86.8337
	ENSG00000100413	POLR3H	8.94136	84.4653	39.2874	44.2314		ENSG00000100483	VCPKMT	4.97513	2.08082	7.08887	4.71494		ENSG00000100532	CGRRF1	7.12404	25.7315	70.9929	34.6161		ENSG00000178719	GRINA	233.502	5.45635	21.5301	86.8296
	ENSG00000100416	TRMU	20.0133	123.15	24.0376	55.7337		ENSG00000100485	SOS2	22.9228	31.9157	5.65825	20.1656		ENSG00000100554	ATP6V1D	65.0732	129.294	40.6369	78.3346		ENSG00000271503	CCL5	256.221	1.91353	2.23295	86.7891
	ENSG00000100417	PMM1	38.985	8.95566	46.4918	31.4775		ENSG00000100490	CDKL1	2.39459	126.812	24.1295	51.1122		ENSG00000100564	PIGH	24.8142	40.8133	52.8692	39.4989		ENSG00000110711	AIP	124.235	77.2472	58.7313	86.7377
	ENSG00000100418	DESI1	25.3251	20.448	20.1135	21.9622		ENSG00000100503	NIN	29.9755	46.4717	2.80932	26.4189		ENSG00000100567	PSMA3	71.822	8.46964	7.26356	29.1851		ENSG00000115935	WIPF1	128.187	100.773	31.233	86.731
	ENSG00000100422	CERK	46.3617	39.7405	21.2742	35.7921		ENSG00000100504	PYGL	123.386	7.53167	27.6935	52.8703		ENSG00000100568	VTI1B	45.2301	5.01122	8.48629	19.5759		ENSG00000167695	TLCD3A	31.8995	9.59779	218.534	86.677
	ENSG00000100425	BRD1	20.4901	25.53	91.0628	45.6943		ENSG00000100505	TRIM9	1.1016	5.36157	117.9	41.4545		ENSG00000100575	TIMM9	45.3222	52.705	12.7685	36.9319		ENSG00000143621	ILF2	198.024	54.7615	7.08387	86.6232
	ENSG00000100426	ZBED4	20.9837	47.7205	34.4703	34.3915		ENSG00000100519	PSMC6	50.5575	62.74	50.3367	54.5447		ENSG00000100577	GSTZ1	4.7259	24.7205	134.747	54.7312		ENSG00000163956	LRPAP1	227.925	12.4332	19.1525	86.5037
	ENSG00000100427	MLC1	94.0859	19.9466	14.9539	42.9955		ENSG00000100522	GNPNAT1	7.66463	27.8806	7.88671	14.4773		ENSG00000100578	KIAA0586	16.5255	5.37869	3.90513	8.6031		ENSG00000146556	WASH2P	2.74746	23.9941	232.58	86.4405
	ENSG00000100429	HDAC10	33.5623	21.0984	44.3837	33.0148		ENSG00000100523	DDHD1	4.67558	8.01057	4.90452	5.86356		ENSG00000100580	TMED8	13.5553	60.4476	52.1518	42.0516		ENSG00000140740	UQCRC2	233.427	5.82726	19.68	86.3116
	ENSG00000100439	ABHD4	15.1307	90.3108	52.3708	52.6041		ENSG00000100526	CDKN3	59.9203	65.4285	57.5438	60.9642		ENSG00000100591	AHSA1	127.859	20.3493	36.3707	61.5262		ENSG00000281181	-	167.119	37.0209	54.728	86.2893
	ENSG00000100441	KHNYN	45.1049	33.27	34.4708	37.6152		ENSG00000100528	CNIH1	25.7907	20.1149	26.2802	24.0619		ENSG00000100592	DAAM1	6.93657	68.6574	1.20696	25.6003		ENSG00000165512	ZNF22	45.0081	112.738	101.105	86.2839
	ENSG00000100442	FKBP3	50.0617	15.8892	3466.8	1177.58		ENSG00000100532	CGRRF1	5.85725	68.9201	6.39625	27.0579		ENSG00000100596	SPTLC2	51.494	34.5343	10.1544	32.0609		ENSG00000125885	MCM8	12.5595	73.3504	172.874	86.2612
	ENSG00000100445	SDR39U1	33.3631	44.3122	28.6863	35.4539		ENSG00000100554	ATP6V1D	44.8537	37.7187	57.6735	46.7486		ENSG00000100599	RIN3	34.0784	48.6645	107.46	63.401		ENSG00000130764	LRRC47	27.6461	173.531	57.4192	86.1987
	ENSG00000100448	CTSG	3460.62	42.2662	55.1373	1186.01		ENSG00000100564	PIGH	23.2147	64.1083	24.0328	37.1186		ENSG00000100601	ALKBH1	13.0172	3.31558	10.5157	8.9495		ENSG00000100216	TOMM22	63.5361	62.7282	132.305	86.1899
	ENSG00000100461	RBM23	30.3858	35.5561	2.62132	22.8544		ENSG00000100567	PSMA3	69.3925	4.73705	71.1498	48.4265		ENSG00000100603	SNW1	101.552	8.80862	39.9398	50.1002		ENSG00000089818	NECAP1	9.25833	234.905	14.3377	86.1669
	ENSG00000100462	PRMT5	55.5589	3434.34	10.7445	1166.88		ENSG00000100568	VTI1B	40.5773	11.0201	38.0256	29.8743		ENSG00000100605	ITPK1	36.0473	11.7965	8.40904	18.7509		ENSG00000087299	L2HGDH	3.168	201.061	54.0421	86.0903
	ENSG00000100478	AP4S1	1.98129	38.8762	10.196	17.0178		ENSG00000100575	TIMM9	55.6094	12.9625	68.9169	45.8296		ENSG00000100612	DHRS7	39.2956	136.148	39.0289	71.4907		ENSG00000115307	AUP1	127.757	56.137	74.3004	86.0648
	ENSG00000100479	POLE2	11.4882	53.9756	25.5119	30.3252		ENSG00000100577	GSTZ1	4.28371	141.97	4.96906	50.4075		ENSG00000100614	PPM1A	10.5593	5.04918	12.83	9.47949		ENSG00000184056	VPS33B	15.8426	34.4665	207.797	86.0355
	ENSG00000100483	VCPKMT	9.83784	2.43349	4.87174	5.71436		ENSG00000100578	KIAA0586	12.4474	4.45446	13.2002	10.034		ENSG00000100628	ASB2	29.0809	48.8621	184.578	87.5069		ENSG00000204463	BAG6	251.399	4.326	2.28598	86.0036
	ENSG00000100485	SOS2	25.8736	11.3431	39.545	25.5872		ENSG00000100580	TMED8	12.4825	56.0162	12.1931	26.8973		ENSG00000100629	CEP128	14.9323	39.3577	24.4025	26.2308		ENSG00000090487	SPG21	99.3768	1.9803	156.64	85.9989
	ENSG00000100490	CDKL1	4.78675	9.93155	188.468	67.7289		ENSG00000100591	AHSA1	130.522	32.6751	132.467	98.5548		ENSG00000100632	ERH	184.263	11.518	10.0397	68.6068		ENSG00000244187	TMEM141	26.9984	1.8513	229.071	85.9734
	ENSG00000100503	NIN	37.4017	26.0878	1.33574	21.6084		ENSG00000100592	DAAM1	4.61122	10.8581	4.68484	6.71807		ENSG00000100644	HIF1A	25.7406	99.3661	224.626	116.578		ENSG00000128708	HAT1	150.634	105.115	1.81557	85.8549
	ENSG00000100504	PYGL	188.197	5.28539	69.1315	87.5381		ENSG00000100596	SPTLC2	52.5966	109.79	53.0187	71.8019		ENSG00000100647	SUSD6	11.3877	39.732	52.8124	34.644		ENSG00000116489	CAPZA1	153.614	95.3504	8.55048	85.8382
	ENSG00000100505	TRIM9	1.40568	38.6901	16.4853	18.8603		ENSG00000100599	RIN3	35.4251	27.0581	35.7862	32.7565		ENSG00000100650	SRSF5	152.891	38.2639	11.1395	67.4314		ENSG00000131037	EPS8L1	9.55683	201.136	46.5178	85.7369
	ENSG00000100519	PSMC6	58.9909	204.801	5.83225	89.8748		ENSG00000100601	ALKBH1	10.7418	40.9515	11.9247	21.206		ENSG00000100664	EIF5	54.9024	11.4488	22.105	29.4854		ENSG00000180198	RCC1	214.154	11.6677	31.3003	85.7075
	ENSG00000100522	GNPNAT1	11.9319	1.19124	85.0026	32.7086		ENSG00000100603	SNW1	103.877	8.40247	108.721	73.6665		ENSG00000100697	DICER1	11.3079	32.1628	45.373	29.6146		ENSG00000109736	MFSD10	149.89	3.84973	103.307	85.6825
	ENSG00000100523	DDHD1	6.01187	79.1852	35.8883	40.3618		ENSG00000100605	ITPK1	36.1971	30.6342	36.0551	34.2955		ENSG00000100711	ZFYVE21	26.0815	12.9658	29.3311	22.7928		ENSG00000169689	CENPX	44.9908	15.5145	196.505	85.6702
	ENSG00000100526	CDKN3	83.3651	17.8543	10.021	37.0801		ENSG00000100612	DHRS7	43.9073	11.5081	46.5551	33.9902		ENSG00000100714	MTHFD1	46.0095	183.403	19.0734	82.8287		ENSG00000170417	TMEM182	8.29365	10.7649	237.538	85.5321
	ENSG00000100528	CNIH1	34.6447	7.29448	80.5512	40.8301		ENSG00000100614	PPM1A	9.70198	182.019	8.73672	66.8193		ENSG00000100722	ZC3H14	25.0906	23.4091	24.4785	24.3261		ENSG00000071462	BUD23	122.532	95.7487	38.0575	85.4459
	ENSG00000100532	CGRRF1	8.37842	102.749	33.4078	48.1785		ENSG00000100628	ASB2	30.913	27.3098	30.0172	29.4133		ENSG00000100726	TELO2	17.5033	10.9616	7.93036	12.1317		ENSG00000147118	ZNF182	16.8383	15.5772	223.755	85.3902
	ENSG00000100554	ATP6V1D	66.8754	38.6409	116.245	73.9203		ENSG00000100629	CEP128	11.0034	9.59792	11.9342	10.8452		ENSG00000100731	PCNX1	24.1619	214.441	34.6717	91.0914		ENSG00000015285	WAS	193.021	30.0517	33.058	85.3768
	ENSG00000100564	PIGH	30.7883	9.62793	57.9266	32.781		ENSG00000100632	ERH	171.239	206.996	178.003	185.413		ENSG00000100744	GSKIP	8.35867	62.7582	53.2594	41.4588		ENSG00000156976	EIF4A2	209.448	43.7017	2.80355	85.3176
	ENSG00000100567	PSMA3	120.043	81.2246	67.4193	89.5625		ENSG00000100644	HIF1A	25.9518	53.6103	26.9596	35.5072		ENSG00000100749	VRK1	44.2406	7.95695	1.39274	17.8634		ENSG00000130544	ZNF557	2.71711	154.417	98.4606	85.1982
	ENSG00000100568	VTI1B	56.3064	33.7845	9.54127	33.2107		ENSG00000100647	SUSD6	10.0167	9.5872	10.4783	10.0274		ENSG00000100764	PSMC1	67.9945	21.333	3.86678	31.0647		ENSG00000102265	TIMP1	207.503	33.5064	14.4625	85.1575
	ENSG00000100575	TIMM9	62.0107	119.938	17.3585	66.4358		ENSG00000100650	SRSF5	205.084	21.9049	209.074	145.354		ENSG00000100767	PAPLN	1.76379	45.0254	37.4696	28.0863		ENSG00000029363	BCLAF1	55.699	195.413	4.12436	85.0787
	ENSG00000100577	GSTZ1	12.3234	59.87	19.9201	30.7045		ENSG00000100664	EIF5	66.5805	41.0725	59.7502	55.8011		ENSG00000100784	RPS6KA5	1.57747	23.9703	4.63035	10.0594		ENSG00000105221	AKT2	82.6052	163.138	9.04732	84.9302
	ENSG00000100578	KIAA0586	17.6134	67.9302	123.208	69.5838		ENSG00000100697	DICER1	8.7323	25.4899	9.02817	14.4168		ENSG00000100796	PPP4R3A	38.0383	19.7675	99.8369	52.5475		ENSG00000141385	AFG3L2	66.9981	6.71469	181.069	84.9272
	ENSG00000100580	TMED8	19.7109	11.0845	6.36997	12.3884		ENSG00000100711	ZFYVE21	23.0887	17.5334	19.2921	19.9714		ENSG00000100802	C14orf93	3.40552	20.6672	73.8578	32.6435		ENSG00000149564	ESAM	2.72051	212.976	38.9887	84.895
	ENSG00000100591	AHSA1	124.356	19.7058	47.5827	63.8816		ENSG00000100714	MTHFD1	40.1156	20.7897	52.1783	37.6945		ENSG00000100804	PSMB5	96.8002	7.98392	205.251	103.345		ENSG00000144118	RALB	119.429	94.2625	40.9132	84.8683
	ENSG00000100592	DAAM1	5.95148	19.8507	30.8069	18.8697		ENSG00000100722	ZC3H14	28.221	8.09589	27.9853	21.4341		ENSG00000100811	YY1	74.0741	48.6268	216.206	112.969		ENSG00000180509	KCNE1	8.94186	238.931	6.66484	84.8459
	ENSG00000100596	SPTLC2	47.0299	126.85	11.9231	61.9343		ENSG00000100726	TELO2	17.6205	44.6934	15.7183	26.0107		ENSG00000100813	ACIN1	179.119	57.0206	7.21038	81.1168		ENSG00000165480	SKA3	21.0858	222.586	10.4648	84.7123
	ENSG00000100599	RIN3	30.1267	6.97438	139.27	58.7903		ENSG00000100731	PCNX1	21.9549	62.1053	21.218	35.0927		ENSG00000100814	CCNB1IP1	208.728	3.84385	219.114	143.895		ENSG00000111321	LTBR	123.603	28.8881	101.619	84.7033
	ENSG00000100601	ALKBH1	13.1476	49.2569	34.3272	32.2439		ENSG00000100744	GSKIP	7.39437	1.72221	7.86683	5.66114		ENSG00000100815	TRIP11	7.03681	3.03848	159.36	56.4783		ENSG00000103174	NAGPA	10.5859	167.818	75.6617	84.6886
	ENSG00000100603	SNW1	138.745	28.8691	60.1997	75.9378		ENSG00000100749	VRK1	31.1608	2.21873	41.8008	25.0601		ENSG00000100823	APEX1	246.544	34.665	3.14823	94.7858		ENSG00000050165	DKK3	2.00023	57.1838	194.755	84.6462
	ENSG00000100605	ITPK1	34.621	11.7639	14.8308	20.4052		ENSG00000100764	PSMC1	56.1878	43.1751	67.2504	55.5378		ENSG00000100836	PABPN1	236.856	3.26968	35.0661	91.7306		ENSG00000140262	TCF12	43.5091	59.3075	151.105	84.6407
	ENSG00000100612	DHRS7	59.4042	141.627	53.305	84.7786		ENSG00000100767	PAPLN	2.71228	4.38407	2.30922	3.13519		ENSG00000100852	ARHGAP5	3.86943	73.9822	40.7853	39.5456		ENSG00000117222	RBBP5	17.0866	35.8106	200.848	84.5817
	ENSG00000100614	PPM1A	14.0781	42.4656	19.4471	25.3303		ENSG00000100784	RPS6KA5	1.74463	94.4289	1.89299	32.6888		ENSG00000100865	CINP	26.2528	76.2078	26.6413	43.034		ENSG00000130402	ACTN4	236.487	4.26109	12.9008	84.5495
	ENSG00000100628	ASB2	56.6536	56.209	262.292	125.052		ENSG00000100796	PPP4R3A	37.6033	75.3343	39.536	50.8245		ENSG00000100883	SRP54	32.3845	178.035	39.2654	83.2282		ENSG00000198771	RCSD1	65.239	10.8466	177.264	84.4499
	ENSG00000100629	CEP128	19.9566	14.8882	38.6101	24.485		ENSG00000100802	C14orf93	3.811	161.476	4.3671	56.5515		ENSG00000100888	CHD8	27.5922	213.957	12.353	84.6341		ENSG00000103275	UBE2I	85.9162	23.942	143.359	84.4056
	ENSG00000100632	ERH	256.815	57.5526	9.78124	108.049		ENSG00000100804	PSMB5	93.2936	204.221	79.8727	125.796		ENSG00000100889	PCK2	34.0005	7.07638	37.493	26.19		ENSG00000114988	LMAN2L	27.1786	15.074	210.771	84.3412
	ENSG00000100644	HIF1A	37.9357	20.2833	335.583	131.267		ENSG00000100811	YY1	76.6295	7.36537	74.4739	52.8229		ENSG00000100890	PRORP	10.6885	226.648	170.594	135.977		ENSG00000185896	LAMP1	214.189	10.9049	27.8165	84.3034
	ENSG00000100647	SUSD6	9.49472	283.447	76.5875	123.177		ENSG00000100813	ACIN1	186.068	202.19	171.233	186.497		ENSG00000100897	DCAF11	37.0956	162.704	51.1595	83.6532		ENSG00000137642	SORL1	62.3582	72.6903	117.83	84.293
	ENSG00000100650	SRSF5	347.551	37.5481	15.4198	133.506		ENSG00000100814	CCNB1IP1	225.534	156.2	224.199	201.978		ENSG00000100902	PSMA6	157.403	2.84615	12.179	57.4762		ENSG00000106066	CPVL	120.416	128.053	4.27056	84.2466
	ENSG00000100664	EIF5	70.0425	9.75591	28.0816	35.96		ENSG00000100815	TRIP11	6.56241	4.54467	7.34076	6.14928		ENSG00000100906	NFKBIA	51.5409	36.8238	113.932	67.4323		ENSG00000146147	MLIP	2.68519	85.8955	164.025	84.202
	ENSG00000100697	DICER1	16.1633	352.318	109.666	159.382		ENSG00000100823	APEX1	189.979	39.4791	198.812	142.757		ENSG00000100908	EMC9	5.85871	45.3176	5.53314	18.9031		ENSG00000101224	CDC25B	56.9027	20.9734	174.655	84.1771
	ENSG00000100711	ZFYVE21	26.0298	73.9943	37.0427	45.6889		ENSG00000100836	PABPN1	140.775	39.0138	155.983	111.924		ENSG00000100911	PSME2	94.4279	30.6806	8.36889	44.4925		ENSG00000042753	AP2S1	239.16	3.2498	9.96126	84.1239
	ENSG00000100714	MTHFD1	89.4831	15.5987	30.7035	45.2618		ENSG00000100852	ARHGAP5	3.72656	25.2703	4.44773	11.1482		ENSG00000100916	BRMS1L	5.39783	39.1946	24.5884	23.0603		ENSG00000101608	MYL12A	201.863	14.9078	35.5004	84.0905
	ENSG00000100722	ZC3H14	36.5637	28.1752	36.491	33.7433		ENSG00000100865	CINP	39.8973	28.4607	33.7629	34.0403		ENSG00000100918	REC8	12.304	10.0051	30.3884	17.5658		ENSG00000152518	ZFP36L2	225.777	14.0963	12.38	84.0843
	ENSG00000100726	TELO2	33.403	83.3962	12.1788	42.9926		ENSG00000100883	SRP54	37.5698	8.55447	43.8049	29.9764		ENSG00000100926	TM9SF1	28.0126	38.4775	85.2661	50.5854		ENSG00000167815	PRDX2	8.03	54.6845	189.425	84.0466
	ENSG00000100731	PCNX1	30.0243	37.7285	68.5516	45.4348		ENSG00000100888	CHD8	23.3715	33.3785	25.5154	27.4218		ENSG00000100934	SEC23A	30.5744	136.168	102.447	89.7296		ENSG00000113649	TCERG1	53.0844	10.9522	188.087	84.0411
	ENSG00000100744	GSKIP	13.134	34.505	86.512	44.717		ENSG00000100889	PCK2	26.0918	157.138	25.6248	69.6182		ENSG00000100938	GMPR2	79.5345	56.6647	17.6058	51.2683		ENSG00000160908	ZNF394	34.0382	215.382	2.69936	84.0399
	ENSG00000100749	VRK1	70.2579	30.1214	3.35121	34.5768		ENSG00000100890	PRORP	9.70105	49.9612	9.40364	23.022		ENSG00000100941	PNN	97.5309	12.7487	58.2068	56.1622		ENSG00000160710	ADAR	106.727	38.8531	106.498	84.0258
	ENSG00000100764	PSMC1	93.1687	12.8118	2.09409	36.0249		ENSG00000100897	DCAF11	33.71	11.0636	31.121	25.2982		ENSG00000100949	RABGGTA	18.801	109.479	36.5584	54.9462		ENSG00000132394	EEFSEC	26.0569	5.27432	220.621	83.9839
	ENSG00000100767	PAPLN	3.82584	61.6336	48.5748	38.0114		ENSG00000100902	PSMA6	152.487	103.75	183.412	146.55		ENSG00000100979	PLTP	55.4167	6.46536	26.2368	29.3729		ENSG00000152455	SUV39H2	13.0281	2.0441	236.735	83.9358
	ENSG00000100784	RPS6KA5	2.09172	83.4465	4.06239	29.8669		ENSG00000100906	NFKBIA	50.709	5.28756	55.4709	37.1558		ENSG00000100982	PCIF1	34.3129	9.99604	60.8387	35.0492		ENSG00000115484	CCT4	216.689	6.17426	28.6651	83.8428
	ENSG00000100796	PPP4R3A	48.5436	3.37609	109.576	53.8318		ENSG00000100908	EMC9	8.94512	13.0384	11.4298	11.1378		ENSG00000100983	GSS	22.4742	20.7509	34.396	25.8737		ENSG00000130520	LSM4	183.293	29.5796	38.6503	83.8408
	ENSG00000100802	C14orf93	4.24331	2.29616	87.9423	31.4939		ENSG00000100911	PSME2	104.646	22.2829	105.035	77.3212		ENSG00000100991	TRPC4AP	43.6757	28.1426	53.7232	41.8471		ENSG00000145365	TIFA	5.26301	3.84565	242.335	83.8145
	ENSG00000100804	PSMB5	121.225	42.1007	196.741	120.022		ENSG00000100916	BRMS1L	4.76353	29.1244	4.53287	12.8069		ENSG00000100994	PYGB	36.3285	70.8795	36.6089	47.939		ENSG00000139998	RAB15	3.1565	238.396	9.64096	83.7311
	ENSG00000100811	YY1	91.4272	4.18924	214.165	103.26		ENSG00000100918	REC8	10.9494	72.2863	12.9325	32.0561		ENSG00000100997	ABHD12	53.9666	97.6318	24.2672	58.6218		ENSG00000089091	DZANK1	6.99664	40.1939	203.818	83.6695
	ENSG00000100813	ACIN1	200.878	123.972	9.51004	111.453		ENSG00000100926	TM9SF1	20.8034	90.3236	19.8697	43.6656		ENSG00000101000	PROCR	31.9858	13.0719	59.5873	34.8817		ENSG00000072415	PALS1	15.9444	173.578	61.4231	83.6487
	ENSG00000100814	CCNB1IP1	199.091	87.1389	264.925	183.718		ENSG00000100934	SEC23A	27.7981	13.3621	28.0895	23.0833		ENSG00000101003	GINS1	22.7184	44.0415	30.631	32.4636		ENSG00000186298	PPP1CC	136.321	17.3632	97.1871	83.6236
	ENSG00000100815	TRIP11	9.01599	215.013	150.685	124.904		ENSG00000100938	GMPR2	84.0833	46.3142	71.4572	67.2849		ENSG00000101019	UQCC1	52.9983	33.0486	4.42188	30.1563		ENSG00000159840	ZYX	206.068	14.3895	30.1147	83.524
	ENSG00000100823	APEX1	210.658	204.569	5.4565	140.228		ENSG00000100941	PNN	87.7904	29.3702	87.9021	68.3542		ENSG00000101040	ZMYND8	28.7619	24.1311	30.833	27.9087		ENSG00000006625	GGCT	209.32	33.7108	7.51344	83.5146
	ENSG00000100836	PABPN1	148.431	9.40613	53.7203	70.5191		ENSG00000100949	RABGGTA	14.745	18.0785	14.145	15.6562		ENSG00000101049	SGK2	3.87869	54.2836	82.3966	46.853		ENSG00000132507	EIF5A	169.506	56.2616	24.6916	83.4863
	ENSG00000100852	ARHGAP5	5.54919	269.419	54.0825	109.684		ENSG00000100979	PLTP	52.5024	55.0064	51.6052	53.038		ENSG00000101052	IFT52	32.754	34.4175	24.9761	30.7159		ENSG00000160072	ATAD3B	16.7448	111.155	122.451	83.45
	ENSG00000100865	CINP	60.9934	128.459	32.587	74.0131		ENSG00000100982	PCIF1	28.3352	31.3979	31.0759	30.2697		ENSG00000101057	MYBL2	82.3994	53.672	156.117	97.3963		ENSG00000111364	DDX55	59.9203	164.396	25.967	83.4279
	ENSG00000100883	SRP54	51.5084	5.71217	73.6252	43.6152		ENSG00000100983	GSS	18.6138	45.2593	18.4339	27.4357		ENSG00000101079	NDRG3	31.1378	30.061	4.09103	21.7633		ENSG00000185187	SIGIRR	37.6382	166.085	46.5513	83.4248
	ENSG00000100888	CHD8	34.1928	51.2726	17.5628	34.3427		ENSG00000100991	TRPC4AP	54.5731	28.613	55.8034	46.3298		ENSG00000101084	RAB5IF	125.133	22.7446	1.62163	49.833		ENSG00000008018	PSMB1	192.407	28.9267	28.468	83.2673
	ENSG00000100889	PCK2	75.4519	62.9371	48.9111	62.4334		ENSG00000100994	PYGB	30.3699	20.0319	29.2158	26.5392		ENSG00000101096	NFATC2	5.0886	49.463	27.3961	27.3159		ENSG00000124767	GLO1	211.404	24.7375	13.5722	83.2378
	ENSG00000100890	PRORP	13.4729	36.034	272.244	107.25		ENSG00000100997	ABHD12	51.0454	55.7221	53.6546	53.474		ENSG00000101104	PABPC1L	2.15669	29.8322	38.0222	23.337		ENSG00000178999	AURKB	144.164	98.4113	7.0865	83.2207
	ENSG00000100897	DCAF11	44.2853	72.9302	50.7323	55.9826		ENSG00000101000	PROCR	27.6096	30.4504	27.285	28.4483		ENSG00000101109	STK4	27.3359	2.68078	35.7431	21.92		ENSG00000131100	ATP6V1E1	159.451	66.3064	23.8359	83.1979
	ENSG00000100902	PSMA6	233.005	17.8821	13.9493	88.2787		ENSG00000101003	GINS1	20.3227	4.41723	18.2336	14.3245		ENSG00000101126	ADNP	37.8455	33.7167	16.8456	29.4692		ENSG00000143156	NME7	3.95901	7.03854	238.538	83.1784
	ENSG00000100906	NFKBIA	51.2073	52.7846	143.408	82.4668		ENSG00000101019	UQCC1	53.8525	30.6963	57.9646	47.5044		ENSG00000101132	PFDN4	32.5884	76.53	27.4633	45.5272		ENSG00000106415	GLCCI1	23.0827	67.4303	158.793	83.102
	ENSG00000100908	EMC9	13.0969	262.494	8.41199	94.6677		ENSG00000101040	ZMYND8	27.2699	60.661	29.4552	39.1287		ENSG00000101138	CSTF1	16.4706	31.2394	61.8782	36.5294		ENSG00000165474	GJB2	3.53553	31.7347	214.031	83.1005
	ENSG00000100911	PSME2	160.919	38.1806	8.39443	69.1647		ENSG00000101049	SGK2	3.92578	28.9452	4.42232	12.4311		ENSG00000101146	RAE1	29.4758	161.852	37.02	76.1159		ENSG00000132383	RPA1	52.3383	11.439	185.29	83.0223
	ENSG00000100916	BRMS1L	9.3193	13.9813	26.164	16.4882		ENSG00000101052	IFT52	31.8191	122.161	33.3984	62.4595		ENSG00000101150	TPD52L2	71.1533	4.47655	31.6488	35.7595		ENSG00000089693	MLF2	148.403	6.69723	93.9497	83.0167
	ENSG00000100918	REC8	6.52466	165.929	45.1601	72.5378		ENSG00000101057	MYBL2	64.4652	5.4777	64.5313	44.8247		ENSG00000101152	DNAJC5	40.1801	1.89916	122.837	54.9722		ENSG00000126773	PCNX4	5.42095	24.8786	218.712	83.0038
	ENSG00000100926	TM9SF1	23.0282	8.96419	68.9091	33.6338		ENSG00000101079	NDRG3	30.1832	2.34834	31.7114	21.4143		ENSG00000101158	NELFCD	36.0022	23.4445	77.903	45.7832		ENSG00000196235	SUPT5H	143.778	103.48	1.64562	82.9678
	ENSG00000100934	SEC23A	45.9173	7.88973	123.263	59.0233		ENSG00000101084	RAB5IF	144.288	24.797	129.422	99.5022		ENSG00000101160	CTSZ	100.119	31.6588	64.9463	65.5746		ENSG00000289701	-	1.65641	241.047	6.17449	82.9594
	ENSG00000100938	GMPR2	75.0214	28.045	21.5963	41.5542		ENSG00000101096	NFATC2	4.94562	39.9378	4.85247	16.5786		ENSG00000101161	PRPF6	79.4974	32.2626	17.7623	43.1741		ENSG00000204178	MACO1	14.4913	120.624	113.755	82.9566
	ENSG00000100941	PNN	118.9	45.4676	50.9768	71.7813		ENSG00000101104	PABPC1L	2.03787	35.8512	2.00071	13.2966		ENSG00000101166	PRELID3B	58.5086	16.0103	267.952	114.157		ENSG00000204344	STK19	14.2525	45.4383	189.168	82.9528
	ENSG00000100949	RABGGTA	23.5452	68.9105	46.366	46.2739		ENSG00000101109	STK4	24.378	15.56	25.6963	21.8781		ENSG00000101181	MTG2	15.3238	28.5651	18.1317	20.6735		ENSG00000147010	SH3KBP1	187.556	52.9627	8.27912	82.9325
	ENSG00000100979	PLTP	55.9519	128.665	28.0503	70.8892		ENSG00000101126	ADNP	22.385	28.735	21.126	24.082		ENSG00000101182	PSMA7	248.667	66.2532	28.5056	114.475		ENSG00000128245	YWHAH	80.0426	165.7	3.00615	82.9162
	ENSG00000100982	PCIF1	47.1675	24.2634	81.6636	51.0315		ENSG00000101132	PFDN4	39.1269	57.7198	35.9091	44.2519		ENSG00000101187	SLCO4A1	18.2167	35.2718	17.9988	23.8291		ENSG00000124571	XPO5	31.1827	199.382	17.9164	82.8271
	ENSG00000100983	GSS	29.8979	62.1955	51.1984	47.7639		ENSG00000101138	CSTF1	14.2917	32.7627	17.4856	21.5134		ENSG00000101189	MRGBP	25.8099	39.7347	19.1512	28.2319		ENSG00000146842	TMEM209	16.6413	229.178	2.63108	82.8168
	ENSG00000100991	TRPC4AP	82.3473	46.9923	53.6107	60.9834		ENSG00000101146	RAE1	28.0305	29.4392	27.2802	28.25		ENSG00000101190	TCFL5	19.3376	140.762	24.6679	61.5892		ENSG00000026508	CD44	125.143	3.02358	120.17	82.7786
	ENSG00000100994	PYGB	51.4232	31.2967	37.9131	40.211		ENSG00000101150	TPD52L2	63.4248	107.629	63.1646	78.0727		ENSG00000101191	DIDO1	19.7366	72.3705	49.3558	47.1543		ENSG00000119596	YLPM1	33.8535	212.24	2.22951	82.7742
	ENSG00000100997	ABHD12	51.9679	79.8674	32.6319	54.8224		ENSG00000101152	DNAJC5	33.6617	77.5211	32.598	47.9269		ENSG00000101193	GID8	28.3398	58.4433	19.6708	35.4846		ENSG00000076662	ICAM3	25.5518	172.39	50.3543	82.7653
	ENSG00000101000	PROCR	39.6754	52.1952	1.24404	31.0382		ENSG00000101158	NELFCD	31.4765	64.5125	34.7581	43.5824		ENSG00000101194	SLC17A9	51.6943	11.1051	2.1501	21.6499		ENSG00000163541	SUCLG1	102.11	4.72369	141.442	82.7583
	ENSG00000101003	GINS1	31.1312	49.2869	49.4145	43.2775		ENSG00000101160	CTSZ	127.872	18.6047	107.478	84.6514		ENSG00000101197	BIRC7	16.4238	277.303	67.3891	120.372		ENSG00000125351	UPF3B	198.171	13.4059	36.6784	82.7519
	ENSG00000101019	UQCC1	48.4827	40.614	28.0357	39.0441		ENSG00000101161	PRPF6	75.6044	237.301	74.4031	129.103		ENSG00000101198	NKAIN4	4.1914	18.3647	1.69019	8.08211		ENSG00000136527	TRA2B	88.7917	88.1759	71.2814	82.7497
	ENSG00000101040	ZMYND8	28.8038	33.1097	2.18144	21.365		ENSG00000101166	PRELID3B	60.0599	14.4977	66.1291	46.8956		ENSG00000101199	ARFGAP1	66.7456	25.046	11.3564	34.3827		ENSG00000133872	SARAF	215.853	26.6812	5.33444	82.6227
	ENSG00000101049	SGK2	2.25426	51.7437	39.2906	31.0962		ENSG00000101181	MTG2	13.0561	23.6372	19.2044	18.6326		ENSG00000101213	PTK6	1.82582	16.2233	44.432	20.8271		ENSG00000133103	COG6	15.1645	5.78007	226.917	82.6204
	ENSG00000101052	IFT52	38.2172	28.9158	147.358	71.497		ENSG00000101182	PSMA7	241.726	18.1012	228.676	162.834		ENSG00000101216	GMEB2	9.35936	17.7592	64.5123	30.5436		ENSG00000067182	TNFRSF1A	82.3899	87.4309	77.9586	82.5931
	ENSG00000101057	MYBL2	148.967	2.29131	1.20431	50.8209		ENSG00000101187	SLCO4A1	14.6662	18.5626	15.4261	16.2183		ENSG00000101220	ADISSP	103.518	27.5337	46.8485	59.3		ENSG00000183255	PTTG1IP	117.093	75.9022	54.6729	82.556
	ENSG00000101076	HNF4A	1.37402	39.5802	40.5311	27.1618		ENSG00000101189	MRGBP	23.8624	24.7714	24.25	24.2946		ENSG00000101224	CDC25B	57.6663	51.8825	18.2333	42.594		ENSG00000112081	SRSF3	214.625	1.96189	31.0377	82.5416
	ENSG00000101079	NDRG3	36.9303	146.963	169.76	117.884		ENSG00000101190	TCFL5	17.4033	46.4656	17.7885	27.2191		ENSG00000101236	RNF24	43.5935	15.2121	11.7781	23.5279		ENSG00000185608	MRPL40	23.6075	14.5193	209.159	82.4285
	ENSG00000101084	RAB5IF	167.866	1.51624	4.60837	57.9969		ENSG00000101191	DIDO1	19.3054	15.0312	18.1707	17.5024		ENSG00000101246	ARFRP1	20.5425	2.53192	109.87	44.3147		ENSG00000160712	IL6R	88.2758	44.508	114.497	82.4268
	ENSG00000101096	NFATC2	4.83252	42.0933	1.47405	16.1333		ENSG00000101193	GID8	27.3693	1.51194	22.6844	17.1885		ENSG00000101247	NDUFAF5	9.40009	72.6744	83.3575	55.144		ENSG00000103249	CLCN7	188.841	44.3669	14.0715	82.4265
	ENSG00000101104	PABPC1L	1.86812	153.311	34.5852	63.2546		ENSG00000101194	SLC17A9	43.3051	57.8372	43.7395	48.2939		ENSG00000101255	TRIB3	102.929	2.25781	48.1995	51.1286		ENSG00000188612	SUMO2	187.484	1.86486	57.8365	82.395
	ENSG00000101109	STK4	36.4899	5.18415	54.7171	32.1304		ENSG00000101197	BIRC7	15.7528	1.84749	12.9556	10.1853		ENSG00000101265	RASSF2	87.6003	8.99666	20.2113	38.9361		ENSG00000205323	SARNP	144.504	96.3476	6.32769	82.3931
	ENSG00000101126	ADNP	17.915	1.84728	44.8056	21.5226		ENSG00000101199	ARFGAP1	59.1989	8.74152	1.24485	23.0618		ENSG00000101266	CSNK2A1	90.3269	98.6207	234.569	141.172		ENSG00000146904	EPHA1	6.00346	226.783	14.2887	82.3583
	ENSG00000101132	PFDN4	44.7821	37.6459	22.9076	35.1119		ENSG00000101213	PTK6	1.99504	81.1821	65.516	49.5644		ENSG00000101290	CDS2	22.03	69.1592	1.83937	31.0095		ENSG00000087365	SF3B2	206.776	3.90217	36.097	82.2583
	ENSG00000101138	CSTF1	21.7386	48.2489	35.2772	35.0883		ENSG00000101216	GMEB2	8.55112	62.6241	2.20676	24.4606		ENSG00000101294	HM13	225.399	44.9815	10.9452	93.7751		ENSG00000146386	ABRACL	178.404	48.2618	20.0372	82.2343
	ENSG00000101146	RAE1	35.47	48.0716	88.546	57.3625		ENSG00000101220	ADISSP	83.8845	45.6005	9.0039	46.163		ENSG00000101306	MYLK2	2.26491	16.4697	26.7749	15.1699		ENSG00000125755	SYMPK	72.1349	171.883	2.39932	82.1392
	ENSG00000101150	TPD52L2	88.1763	23.1069	41.4824	50.9218		ENSG00000101224	CDC25B	64.9308	11.8474	82.9454	53.2412		ENSG00000101307	SIRPB1	13.5364	14.8162	3.33051	10.561		ENSG00000023330	ALAS1	107.466	24.4948	114.188	82.0497
	ENSG00000101152	DNAJC5	42.6689	36.2081	38.7165	39.1979		ENSG00000101236	RNF24	48.5435	12.9933	63.1817	41.5728		ENSG00000101310	SEC23B	31.5555	114.945	180.839	109.113		ENSG00000060339	CCAR1	124.062	5.31292	116.583	81.986
	ENSG00000101158	NELFCD	41.663	88.9305	132.212	87.6019		ENSG00000101246	ARFRP1	14.1016	79.287	47.2848	46.8911		ENSG00000101311	FERMT1	4.56184	78.1236	133.983	72.2228		ENSG00000079387	SENP1	11.1527	162.119	72.522	81.9311
	ENSG00000101160	CTSZ	143.48	40.9977	79.6169	88.0315		ENSG00000101247	NDUFAF5	14.3881	12.8863	13.7553	13.6766		ENSG00000101331	CCM2L	2.00323	71.6295	14.9087	29.5138		ENSG00000128596	CCDC136	149.634	34.3275	61.8107	81.924
	ENSG00000101161	PRPF6	79.4817	40.3903	103.418	74.4301		ENSG00000101255	TRIB3	88.4397	55.2113	12.9882	52.2131		ENSG00000101336	HCK	175.822	17.6944	60.5615	84.6926		ENSG00000066422	ZBTB11	25.8099	117.303	102.583	81.8987
	ENSG00000101166	PRELID3B	98.4166	119.38	22.76	80.1857		ENSG00000101265	RASSF2	77.3677	21.2269	81.6481	60.0809		ENSG00000101337	TM9SF4	136.24	233.218	4.405	124.621		ENSG00000126254	RBM42	123.656	60.4311	61.4633	81.8503
	ENSG00000101181	MTG2	15.1856	80.1439	320.658	138.663		ENSG00000101266	CSNK2A1	62.2393	212.636	14.8667	96.5807		ENSG00000101343	CRNKL1	16.7316	4.75434	14.1279	11.8713		ENSG00000134697	GNL2	86.0503	130.786	28.6556	81.8308
	ENSG00000101182	PSMA7	324.289	104.584	25.7752	151.549		ENSG00000101278	RPS10P5	1.45193	2.99894	52.2685	18.9065		ENSG00000101346	POFUT1	53.702	12.231	1.69778	22.5436		ENSG00000198176	TFDP1	224.058	6.56699	14.7671	81.7974
	ENSG00000101187	SLCO4A1	28.7017	16.5522	33.9395	26.3978		ENSG00000101290	CDS2	21.7122	12.4722	20.5712	18.2519		ENSG00000101347	SAMHD1	3.53139	29.7284	167.459	66.9064		ENSG00000131236	CAP1	213.104	30.1582	1.87922	81.7139
	ENSG00000101189	MRGBP	33.5105	328.17	21.3953	127.692		ENSG00000101294	HM13	221.228	27.4834	225.103	157.938		ENSG00000101350	KIF3B	16.5613	2.39336	10.4084	9.78768		ENSG00000137409	MTCH1	213.324	26.3723	4.98226	81.5597
	ENSG00000101190	TCFL5	21.0117	28.0284	28.5892	25.8764		ENSG00000101306	MYLK2	2.93704	2.73893	2.52708	2.73435		ENSG00000101361	NOP56	177.101	1.69309	136.924	105.239		ENSG00000141458	NPC1	34.9816	42.5274	167.007	81.5054
	ENSG00000101191	DIDO1	28.9667	33.2294	35.5185	32.5715		ENSG00000101307	SIRPB1	13.1006	159.781	12.9424	61.9412		ENSG00000101363	MANBAL	10.0469	191.093	183.83	128.323		ENSG00000114544	SLC41A3	17.5852	24.391	202.411	81.4624
	ENSG00000101193	GID8	39.3194	20.6482	54.3094	38.0923		ENSG00000101310	SEC23B	26.7497	130.804	27.8711	61.8083		ENSG00000101365	IDH3B	127.789	131.907	4.85998	88.1855		ENSG00000005882	PDK2	9.12896	7.27345	227.906	81.4363
	ENSG00000101194	SLC17A9	57.7431	27.6949	28.7192	38.0524		ENSG00000101311	FERMT1	3.16239	17.5821	2.7183	7.82092		ENSG00000101367	MAPRE1	187.792	16.3021	57.3506	87.1483		ENSG00000130529	TRPM4	108.421	106.855	28.8357	81.3703
	ENSG00000101197	BIRC7	29.3573	37.0426	1.88548	22.7618		ENSG00000101331	CCM2L	1.19894	58.9634	1.43414	20.5322		ENSG00000101384	JAG1	4.81786	58.4713	2.04285	21.7774		ENSG00000215252	GOLGA8B	13.4768	146.85	83.4302	81.2525
	ENSG00000101198	NKAIN4	1.76195	56.9531	57.5742	38.7631		ENSG00000101336	HCK	160.747	5.02356	164.58	110.117		ENSG00000101391	CDK5RAP1	55.738	5.16099	11.3224	24.0738		ENSG00000102181	CD99L2	29.1014	212.144	2.47807	81.241
	ENSG00000101199	ARFGAP1	61.6392	26.7832	1.77828	30.0669		ENSG00000101337	TM9SF4	130.782	16.7546	134.359	93.9651		ENSG00000101400	SNTA1	1.32785	16.7428	16.4365	11.5024		ENSG00000171132	PRKCE	9.32295	116.828	117.476	81.2091
	ENSG00000101213	PTK6	1.76993	1.7647	12.8865	5.4737		ENSG00000101343	CRNKL1	14.75	1.37172	14.9652	10.3623		ENSG00000101407	TTI1	9.91016	174.411	17.8892	67.4035		ENSG00000245248	USP2-AS1	5.82505	216.865	20.9314	81.2071
	ENSG00000101216	GMEB2	14.5988	57.1007	133.916	68.5386		ENSG00000101346	POFUT1	54.8492	150.111	59.74	88.2334		ENSG00000101412	E2F1	17.2857	9.04809	3.52586	9.95323		ENSG00000114480	GBE1	102.132	75.7331	65.7246	81.1965
	ENSG00000101220	ADISSP	136.975	2.35271	99.3333	79.5536		ENSG00000101347	SAMHD1	4.24473	10.2694	4.42773	6.31397		ENSG00000101413	RPRD1B	19.9908	138.892	115.123	91.3351		ENSG00000028839	TBPL1	9.14776	21.3646	212.824	81.1121
	ENSG00000101224	CDC25B	96.7585	13.3901	57.8691	56.0059		ENSG00000101350	KIF3B	15.7135	123.086	16.9368	51.9123		ENSG00000101417	PXMP4	4.39057	189.601	176.195	123.396		ENSG00000116560	SFPQ	173.334	31.2838	38.6616	81.093
	ENSG00000101236	RNF24	59.3406	128.67	26.1895	71.3999		ENSG00000101353	MROH8	1.76558	194.68	150.659	115.702		ENSG00000101421	CHMP4B	132.701	5.06432	1.24088	46.3353		ENSG00000166946	CCNDBP1	31.634	110.248	101.324	81.0688
	ENSG00000101246	ARFRP1	31.0477	100.819	15.9898	49.2854		ENSG00000101361	NOP56	151.989	4.35273	10.7461	55.6958		ENSG00000101439	CST3	115.189	58.9167	5.11683	59.7408		ENSG00000185818	NAT8L	7.18841	216.287	19.6223	81.0326
	ENSG00000101247	NDUFAF5	13.1839	57.6939	375.821	148.899		ENSG00000101363	MANBAL	10.7039	53.4306	113.601	59.2453		ENSG00000101442	ACTR5	5.69902	1.21298	197.656	68.1892		ENSG00000131747	TOP2A	230.166	3.19805	9.71953	81.0279
	ENSG00000101255	TRIB3	393.117	26.9209	25.3573	148.465		ENSG00000101365	IDH3B	115.318	1.24047	183.638	100.065		ENSG00000101444	AHCY	223.381	10.5509	11.2195	81.7171		ENSG00000142082	SIRT3	9.90201	29.1108	204.01	81.0076
	ENSG00000101265	RASSF2	113.963	16.265	78.601	69.6098		ENSG00000101367	MAPRE1	189.254	9.49559	4.34478	67.6981		ENSG00000101447	FAM83D	16.2302	14.4311	10.6613	13.7742		ENSG00000160014	CALM3	217.894	15.339	9.53983	80.9242
	ENSG00000101266	CSNK2A1	79.3044	373.768	1.08854	151.387		ENSG00000101384	JAG1	4.58771	11.691	51.4339	22.5708		ENSG00000101452	DHX35	14.2637	17.7499	54.3567	28.7901		ENSG00000162065	TBC1D24	5.45227	14.5202	222.684	80.8854
	ENSG00000101290	CDS2	20.6954	120.142	21.9087	54.2488		ENSG00000101391	CDK5RAP1	56.3223	18.6599	1.49681	25.493		ENSG00000101457	DNTTIP1	63.37	3.74507	18.5733	28.5628		ENSG00000100029	PES1	99.1502	7.81278	135.686	80.8829
	ENSG00000101294	HM13	313.772	80.6821	307.892	234.115		ENSG00000101407	TTI1	10.5871	3.67548	11.015	8.42588		ENSG00000101464	PIGU	21.7732	115.642	2.76477	46.7266		ENSG00000213563	C8orf82	5.92989	117.166	119.433	80.8429
	ENSG00000101306	MYLK2	3.27309	1.13571	2.74328	2.38403		ENSG00000101412	E2F1	12.6152	125.118	13.2296	50.321		ENSG00000101470	TNNC2	2.01644	212.772	13.2138	76.0009		ENSG00000134748	PRPF38A	31.083	8.16191	203.112	80.7855
	ENSG00000101307	SIRPB1	14.2277	22.2458	12.9097	16.461		ENSG00000101413	RPRD1B	17.2712	179.536	17.2452	71.3507		ENSG00000101473	ACOT8	18.9546	5.66826	92.1305	38.9178		ENSG00000113555	PCDH12	1.55692	5.76345	235.02	80.7802
	ENSG00000101310	SEC23B	48.1689	305.266	46.9194	133.452		ENSG00000101417	PXMP4	3.69444	4.26364	3.65592	3.87134		ENSG00000101474	APMAP	91.9617	205.236	20.2295	105.809		ENSG00000164054	SHISA5	143.648	17.0544	81.4849	80.7292
	ENSG00000101311	FERMT1	11.5019	4.01828	12.2278	9.24933		ENSG00000101421	CHMP4B	122.119	192.524	129.176	147.94		ENSG00000101493	ZNF516	19.7741	13.5498	15.1342	16.1527		ENSG00000139197	PEX5	25.1175	25.5433	191.329	80.6632
	ENSG00000101327	PDYN	1.34088	13.7519	2.898	5.99692		ENSG00000101439	CST3	199.386	13.637	57.4765	90.1665		ENSG00000101544	ADNP2	15.8287	10.8845	12.1343	12.9491		ENSG00000076043	REXO2	77.2507	90.4969	74.1182	80.6219
	ENSG00000101331	CCM2L	2.17438	48.4076	247.508	99.3633		ENSG00000101442	ACTR5	3.88438	11.4018	4.10241	6.46286		ENSG00000101546	RBFA	11.6938	57.1297	28.3292	32.3842		ENSG00000110852	CLEC2B	215.198	12.8249	13.8375	80.6201
	ENSG00000101336	HCK	248.145	12.0015	130.604	130.25		ENSG00000101444	AHCY	187.448	48.156	191.64	142.415		ENSG00000101557	USP14	28.6256	21.9406	38.3761	29.6474		ENSG00000125657	TNFSF9	12.6674	216.261	12.8971	80.6084
	ENSG00000101337	TM9SF4	127.597	2.50431	21.5922	50.5644		ENSG00000101447	FAM83D	13.6156	18.3959	14.8821	15.6312		ENSG00000101558	VAPA	73.7771	2.24241	8.25779	28.0924		ENSG00000197157	SND1	210.958	25.6728	5.16562	80.5989
	ENSG00000101343	CRNKL1	20.8345	256.665	98.7097	125.403		ENSG00000101452	DHX35	11.2081	1.92959	12.3971	8.51158		ENSG00000101574	METTL4	9.40117	19.5634	13.8785	14.281		ENSG00000108654	DDX5	140.233	12.1424	89.3253	80.5668
	ENSG00000101346	POFUT1	98.8896	138.322	4.74108	80.6511		ENSG00000101457	DNTTIP1	47.5838	16.6553	49.6979	37.979		ENSG00000101577	LPIN2	14.8694	92.6804	25.8629	44.4709		ENSG00000141480	ARRB2	173.87	42.4744	25.3518	80.5655
	ENSG00000101347	SAMHD1	4.72625	22.6831	26.8841	18.0978		ENSG00000101464	PIGU	16.9688	90.2419	17.9422	41.7176		ENSG00000101596	SMCHD1	28.6272	20.0025	1.66295	16.7642		ENSG00000117614	SYF2	146.114	33.3031	62.1796	80.5321
	ENSG00000101350	KIF3B	27.7667	97.0975	1.54009	42.1348		ENSG00000101470	TNNC2	3.07151	17.9001	3.20484	8.05881		ENSG00000101605	MYOM1	1.76133	14.9986	240.949	85.903		ENSG00000050426	LETMD1	76.6521	156.664	8.14718	80.4876
	ENSG00000101361	NOP56	253.807	5.1464	259.823	172.925		ENSG00000101473	ACOT8	14.6382	11.344	14.9286	13.6369		ENSG00000101608	MYL12A	244.202	11.04	9.71912	88.3202		ENSG00000233016	SNHG7	221.91	4.41602	14.9537	80.4266
	ENSG00000101363	MANBAL	13.3069	28.7619	11.6981	17.9223		ENSG00000101474	APMAP	91.8782	9.73061	84.2919	61.9669		ENSG00000101624	CEP76	7.75445	30.1463	9.41188	15.7709		ENSG00000182117	NOP10	229.81	7.12964	4.27807	80.406
	ENSG00000101365	IDH3B	170.076	1.7692	174.935	115.594		ENSG00000101493	ZNF516	18.7735	33.0573	19.7849	23.8719		ENSG00000101639	CEP192	9.56669	46.8977	16.9674	24.4773		ENSG00000125991	ERGIC3	213.953	9.33958	17.6513	80.3147
	ENSG00000101367	MAPRE1	295.569	266.064	297.707	286.446		ENSG00000101544	ADNP2	13.448	42.1014	12.7661	22.7718		ENSG00000101654	RNMT	13.7212	6.27352	8.08797	9.36089		ENSG00000134014	ELP3	36.7951	93.0196	111.107	80.3072
	ENSG00000101384	JAG1	8.57982	12.4567	7.59161	9.54271		ENSG00000101546	RBFA	10.7595	7.93848	9.06047	9.2528		ENSG00000101665	SMAD7	6.78211	13.9425	2.22557	7.65008		ENSG00000153107	ANAPC1	31.9734	40.0438	168.888	80.3016
	ENSG00000101391	CDK5RAP1	71.8112	165.44	79.8901	105.714		ENSG00000101557	USP14	30.0531	14.125	31.321	25.1663		ENSG00000101695	RNF125	2.17814	27.9042	26.1672	18.7498		ENSG00000160991	ORAI2	11.7179	195.44	33.5574	80.2385
	ENSG00000101400	SNTA1	1.97229	300.953	1.38251	101.436		ENSG00000101558	VAPA	48.3885	31.4729	43.713	41.1914		ENSG00000101745	ANKRD12	33.2472	1.9793	6.06804	13.7649		ENSG00000022840	RNF10	84.0081	78.9545	77.7238	80.2288
	ENSG00000101407	TTI1	15.5665	9.41788	16.2976	13.7607		ENSG00000101574	METTL4	7.29113	1.96311	8.50001	5.91808		ENSG00000101751	POLI	7.39337	244.578	15.2289	89.0668		ENSG00000135972	MRPS9	75.9543	3.19489	161.484	80.2112
	ENSG00000101412	E2F1	26.4728	75.2026	26.7098	42.795		ENSG00000101577	LPIN2	14.7046	223.438	14.5561	84.2329		ENSG00000101752	MIB1	12.8106	9.22244	20.2563	14.0964		ENSG00000166482	MFAP4	90.9417	109.003	40.5806	80.1751
	ENSG00000101413	RPRD1B	26.4412	1.27241	26.1774	17.9637		ENSG00000101596	SMCHD1	29.0891	7.77385	30.0361	22.2997		ENSG00000101773	RBBP8	19.5276	10.6053	35.4727	21.8685		ENSG00000119640	ACYP1	27.5123	6.55714	206.212	80.0938
	ENSG00000101417	PXMP4	4.62725	17.1541	4.46765	8.74967		ENSG00000101605	MYOM1	2.8035	10.353	2.53503	5.2305		ENSG00000101782	RIOK3	34.7774	16.9579	11.6833	21.1395		ENSG00000207508	RNU6-1237P	1.90614	234.854	3.47857	80.0795
	ENSG00000101421	CHMP4B	147.887	25.3654	142.576	105.276		ENSG00000101608	MYL12A	222.094	18.4461	241.499	160.68		ENSG00000101811	CSTF2	14.2858	6.27223	40.6466	20.4016		ENSG00000147677	EIF3H	229.642	6.40784	4.17767	80.0757
	ENSG00000101439	CST3	119.503	28.7777	140.051	96.1104		ENSG00000101624	CEP76	7.99039	6.6105	7.60004	7.40031		ENSG00000101843	PSMD10	35.1646	2.42178	12.4101	16.6655		ENSG00000068650	ATP11A	58.1539	113.781	68.2729	80.0694
	ENSG00000101442	ACTR5	9.19885	5.41435	7.62402	7.41241		ENSG00000101639	CEP192	9.30812	2.06073	10.5166	7.29513		ENSG00000101844	ATG4A	8.61076	29.0847	1.26012	12.9852		ENSG00000245848	CEBPA	220.127	3.18341	16.8506	80.0535
	ENSG00000101444	AHCY	265.759	140.747	170.06	192.189		ENSG00000101654	RNMT	17.6383	36.9172	11.9526	22.1694		ENSG00000101846	STS	1.27963	6.23993	20.2251	9.24823		ENSG00000164889	SLC4A2	90.2739	31.3571	118.498	80.0431
	ENSG00000101447	FAM83D	26.1592	81.8344	24.0122	44.0019		ENSG00000101665	SMAD7	6.74501	6.71552	6.09763	6.51939		ENSG00000101849	TBL1X	23.4585	14.0218	34.6001	24.0268		ENSG00000091409	ITGA6	32.0464	21.6931	186.309	80.0162
	ENSG00000101452	DHX35	17.4544	7.88258	17.4625	14.2665		ENSG00000101695	RNF125	1.84153	15.1995	1.84293	6.29467		ENSG00000101856	PGRMC1	36.0251	19.1686	21.3872	25.527		ENSG00000004779	NDUFAB1	101.493	114.747	23.5358	79.9252
	ENSG00000101457	DNTTIP1	59.1013	178.256	53.4642	96.9404		ENSG00000101745	ANKRD12	38.7595	23.2082	32.699	31.5556		ENSG00000101868	POLA1	19.0161	39.2858	1.57016	19.9574		ENSG00000170540	ARL6IP1	203.121	16.0736	20.4041	79.8661
	ENSG00000101464	PIGU	31.1297	22.4718	31.7138	28.4384		ENSG00000101751	POLI	8.48197	38.1736	8.32614	18.3272		ENSG00000101871	MID1	1.62946	13.313	13.8433	9.59528		ENSG00000101311	FERMT1	3.54326	186.873	49.0282	79.8147
	ENSG00000101470	TNNC2	1.16193	17.9865	34.9377	18.0287		ENSG00000101752	MIB1	14.0209	12.1703	14.4065	13.5325		ENSG00000101882	NKAP	8.29609	40.981	11.2834	20.1868		ENSG00000063322	MED29	22.3515	192.102	24.9518	79.8018
	ENSG00000101473	ACOT8	31.7026	59.0333	92.7054	61.1471		ENSG00000101773	RBBP8	22.0264	38.8488	23.3949	28.0901		ENSG00000101883	RHOXF1	1.28455	8.86429	11.1728	7.10723		ENSG00000077454	LRCH4	155.453	71.8378	11.9843	79.7584
	ENSG00000101474	APMAP	93.1915	32.1558	21.8797	49.0757		ENSG00000101782	RIOK3	40.1205	10.1472	39.6296	29.9658		ENSG00000101888	NXT2	12.8651	20.6148	54.043	29.1743		ENSG00000072506	HSD17B10	172.412	29.8619	36.9624	79.7456
	ENSG00000101493	ZNF516	20.2823	30.1689	27.1282	25.8598		ENSG00000101811	CSTF2	12.7601	1.17875	12.0864	8.67507		ENSG00000101901	ALG13	7.61831	31.7205	10.5206	16.6198		ENSG00000023734	STRAP	99.0724	10.5038	129.248	79.6079
	ENSG00000101544	ADNP2	27.6199	97.5804	18.427	47.8758		ENSG00000101843	PSMD10	38.1655	23.5304	38.3115	33.3358		ENSG00000101911	PRPS2	55.4066	19.5176	4.57525	26.4998		ENSG00000120802	TMPO	98.246	22.0305	118.54	79.6054
	ENSG00000101546	RBFA	17.5033	18.4798	41.7142	25.8991		ENSG00000101844	ATG4A	9.55557	35.8374	10.4567	18.6165		ENSG00000101928	MOSPD1	12.7705	6.86094	25.532	15.0545		ENSG00000115762	PLEKHB2	100.702	120.596	17.5045	79.6009
[truncated: 12,635 more rows]
